# Supplementary material
Source: MDPI journal article supplement (https://www.mdpi.com/2673-7140/3/4/56)
Supplement: s1 [file s1]

Archive with 8 entries (8 files):
- Supplementary Figure S1.pdf
- Supplementary Figure S2.pdf
- Supplementary Figure S3.pdf
- Supplementary Table S1.xlsx
- Supplementary Table S2.xlsx
- Supplementary Table S3.xlsx
- Supplementary Table S4.xlsx
- Supplementary Table S5.xlsx
