# Supplementary material
Source: MDPI journal article supplement (https://www.mdpi.com/2673-7140/3/4/56)

**Supplementary Figure S1A** Volcano plots showing differential gene expression for 394-1-27-12 (resistant) at 12, 24, 72 and 120 hours post inoculation (hpi)

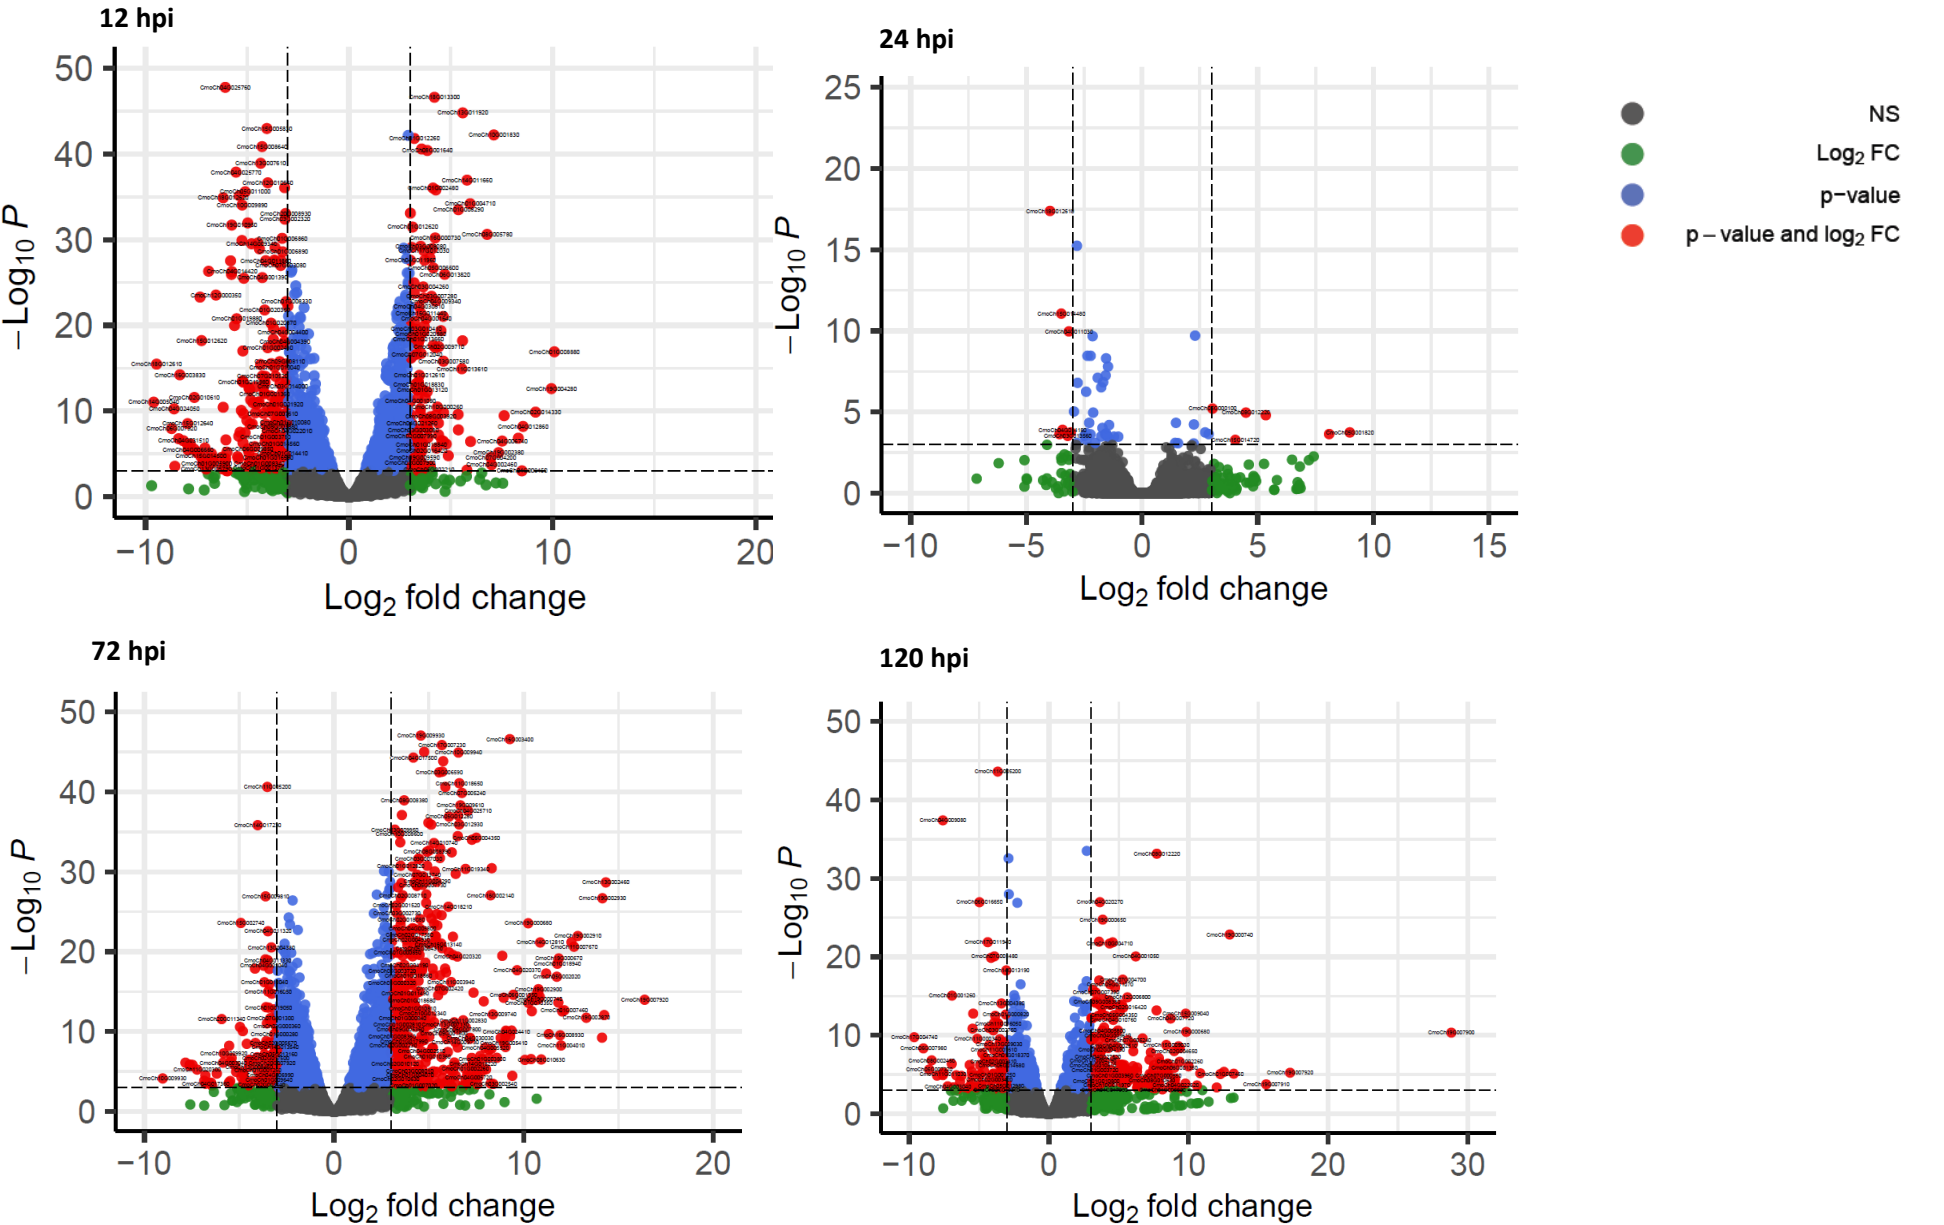

$\log_2$  fold change cutoff, 3; p-value cutoff,  $10e-4$

**Supplementary Figure S1B** Volcano plots showing differential gene expression for Butterbush (susceptible) at 12, 24, 72 and 120 hours post inoculation (hpi)

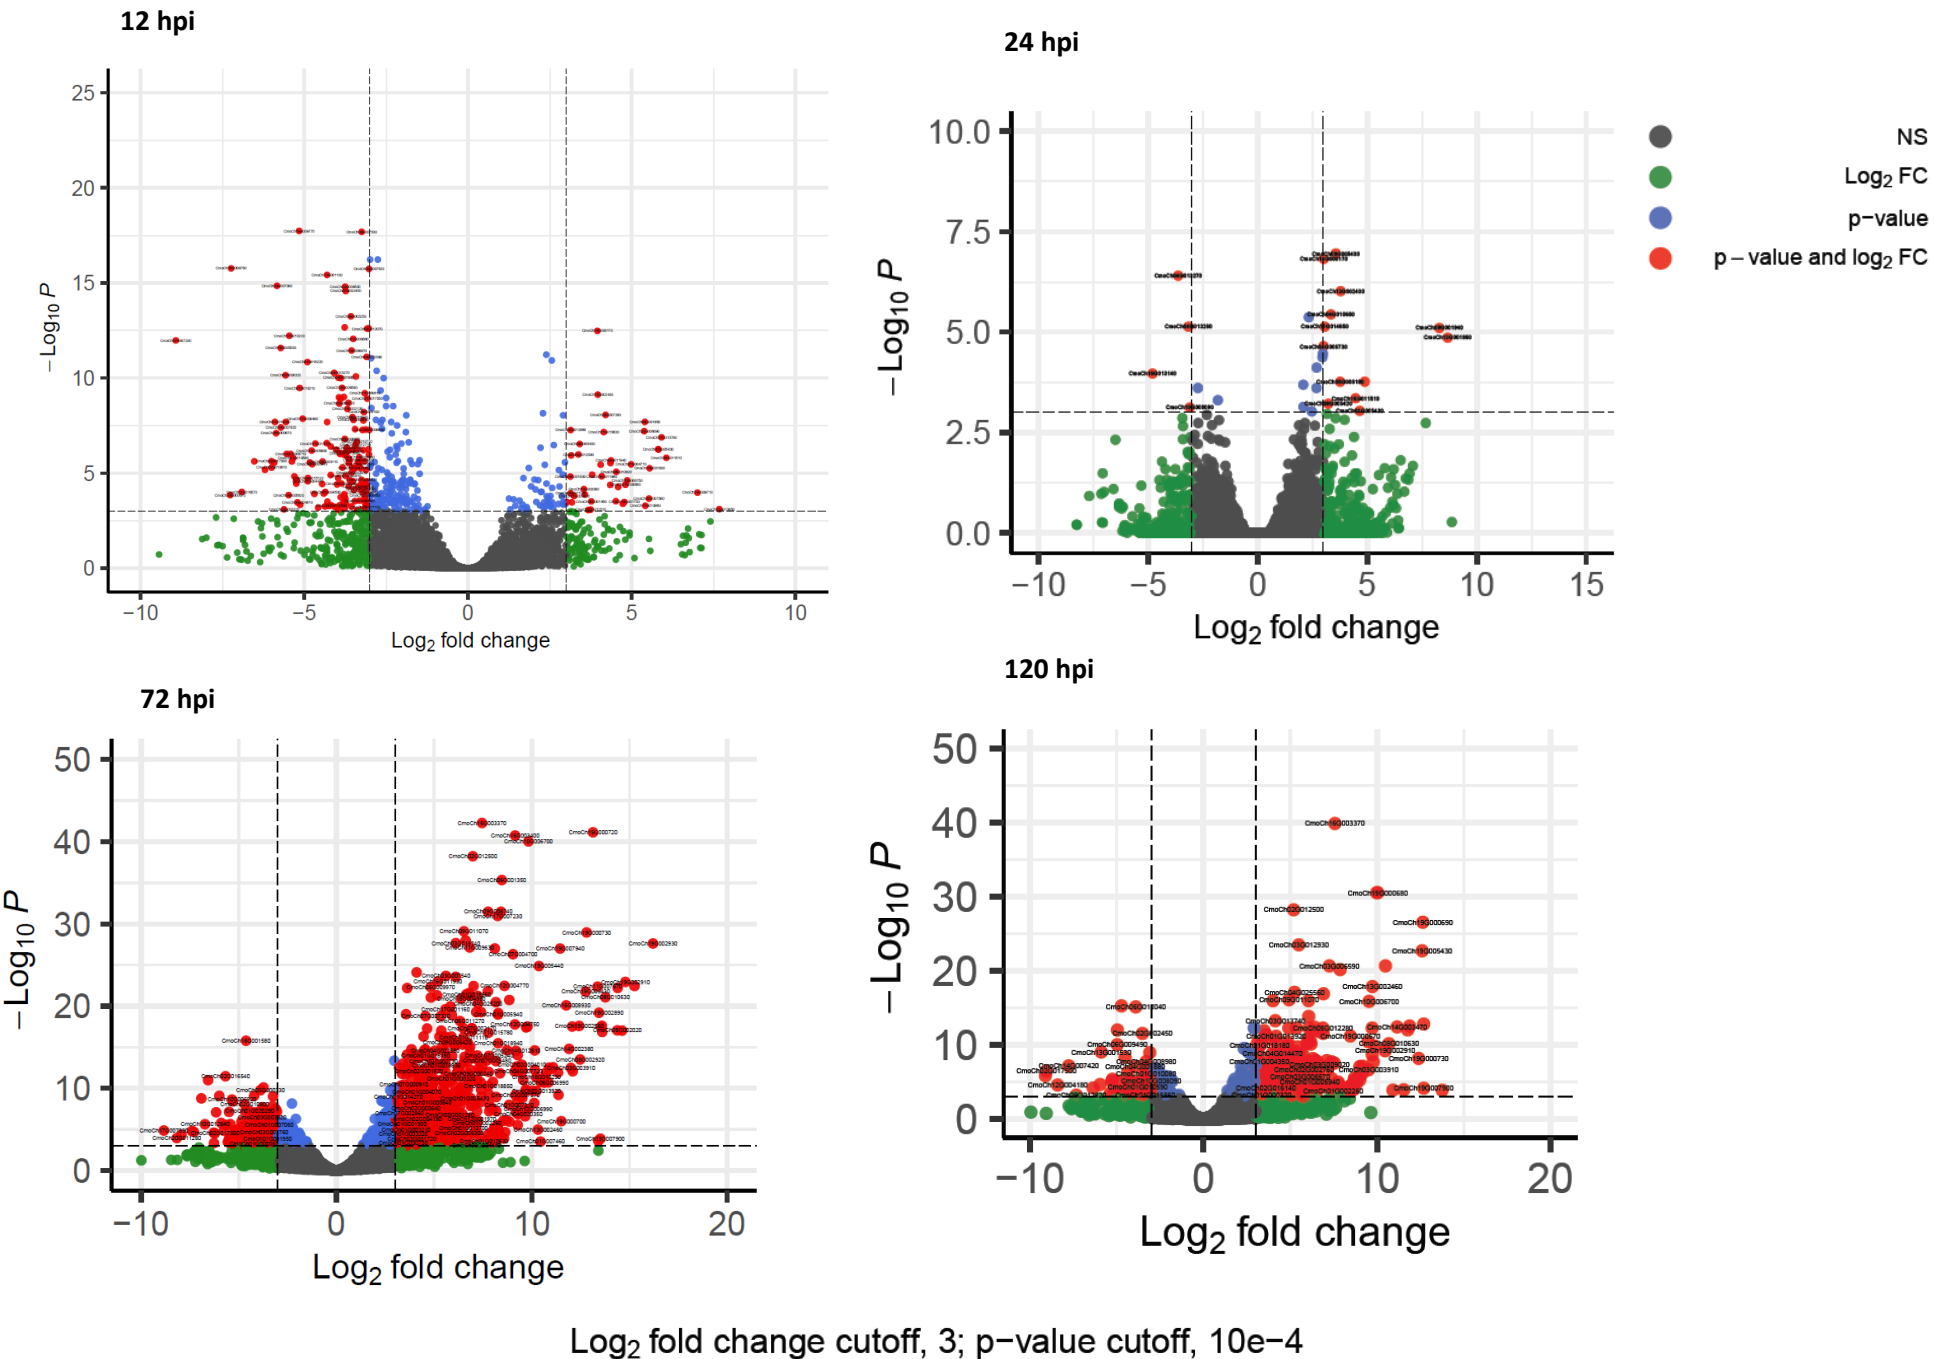

Supplement: s1 [file s1 › Supplementary Figure S1.pdf]
