# Supplementary material
Source: MDPI journal article supplement (https://www.mdpi.com/2673-7140/3/4/56)

**Supplementary Figure S2A** Heat map for the top 25 upregulated and downregulated in 394-1-27-12 (coded as SS30) at 12 hours post inoculation (hpi).

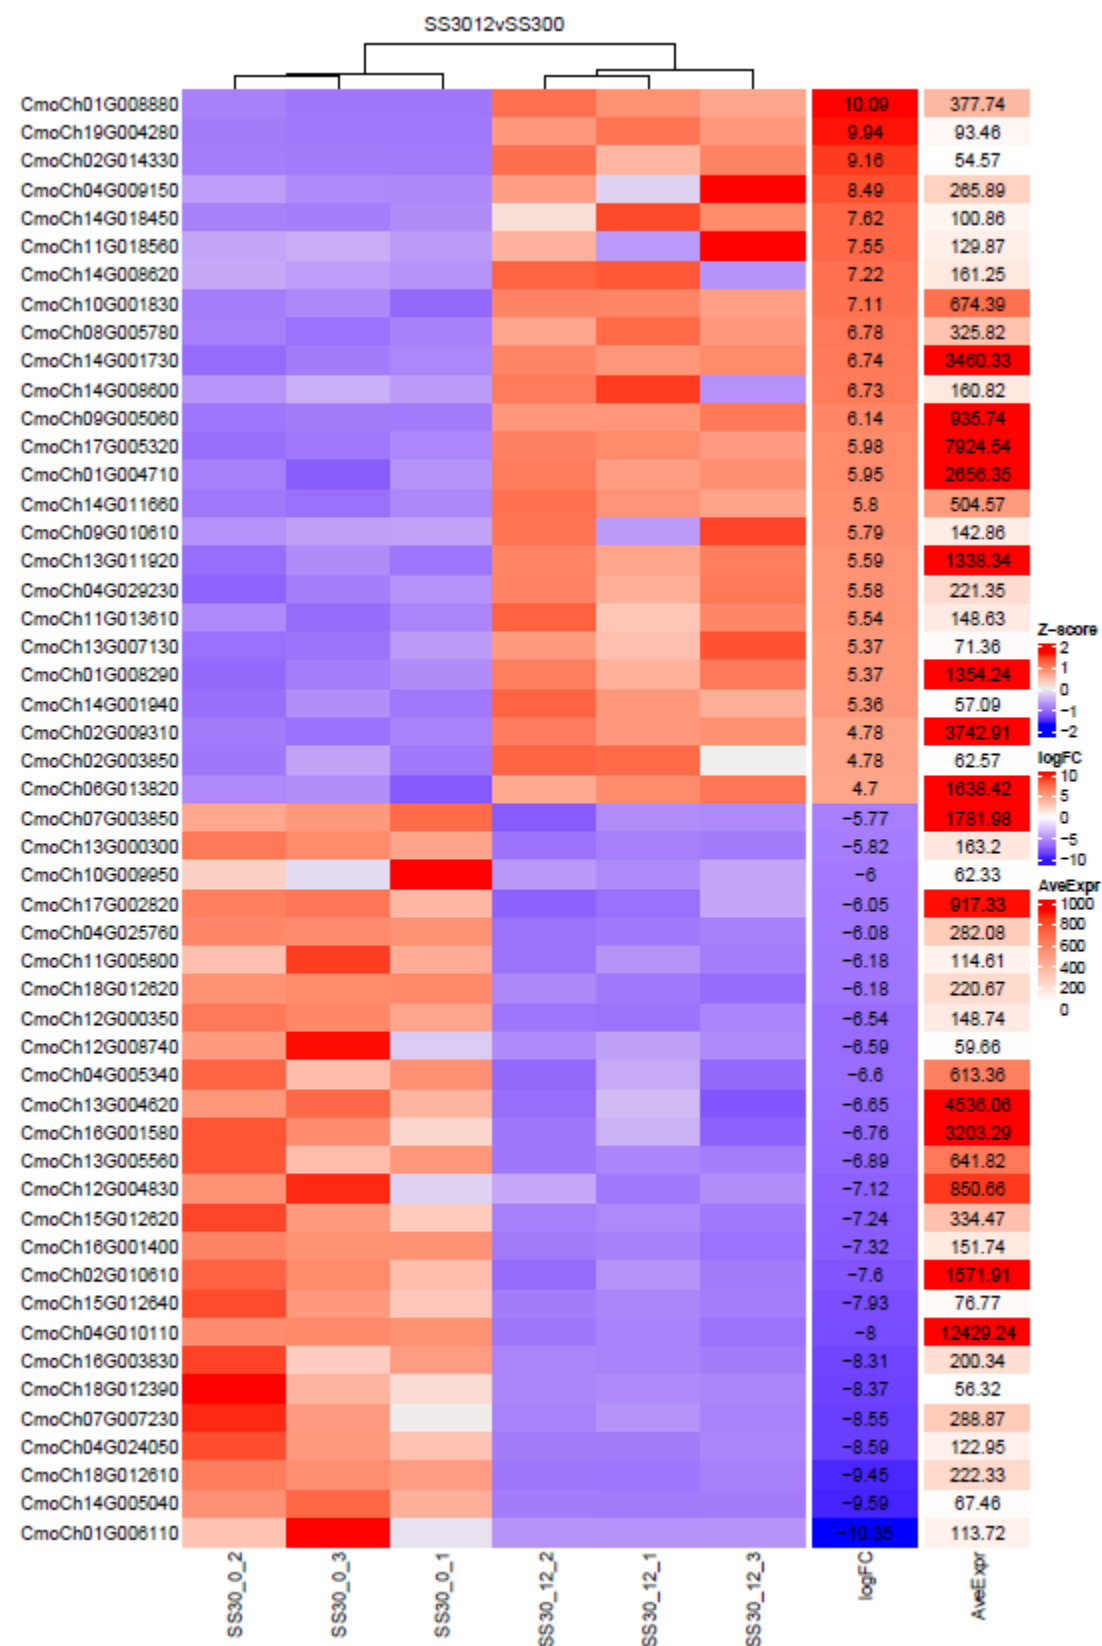

**Supplementary Figure S2B** Heat map for the top 25 upregulated and downregulated in 394-1-27-12 (coded as SS30) at 24 hours post inoculation (hpi).

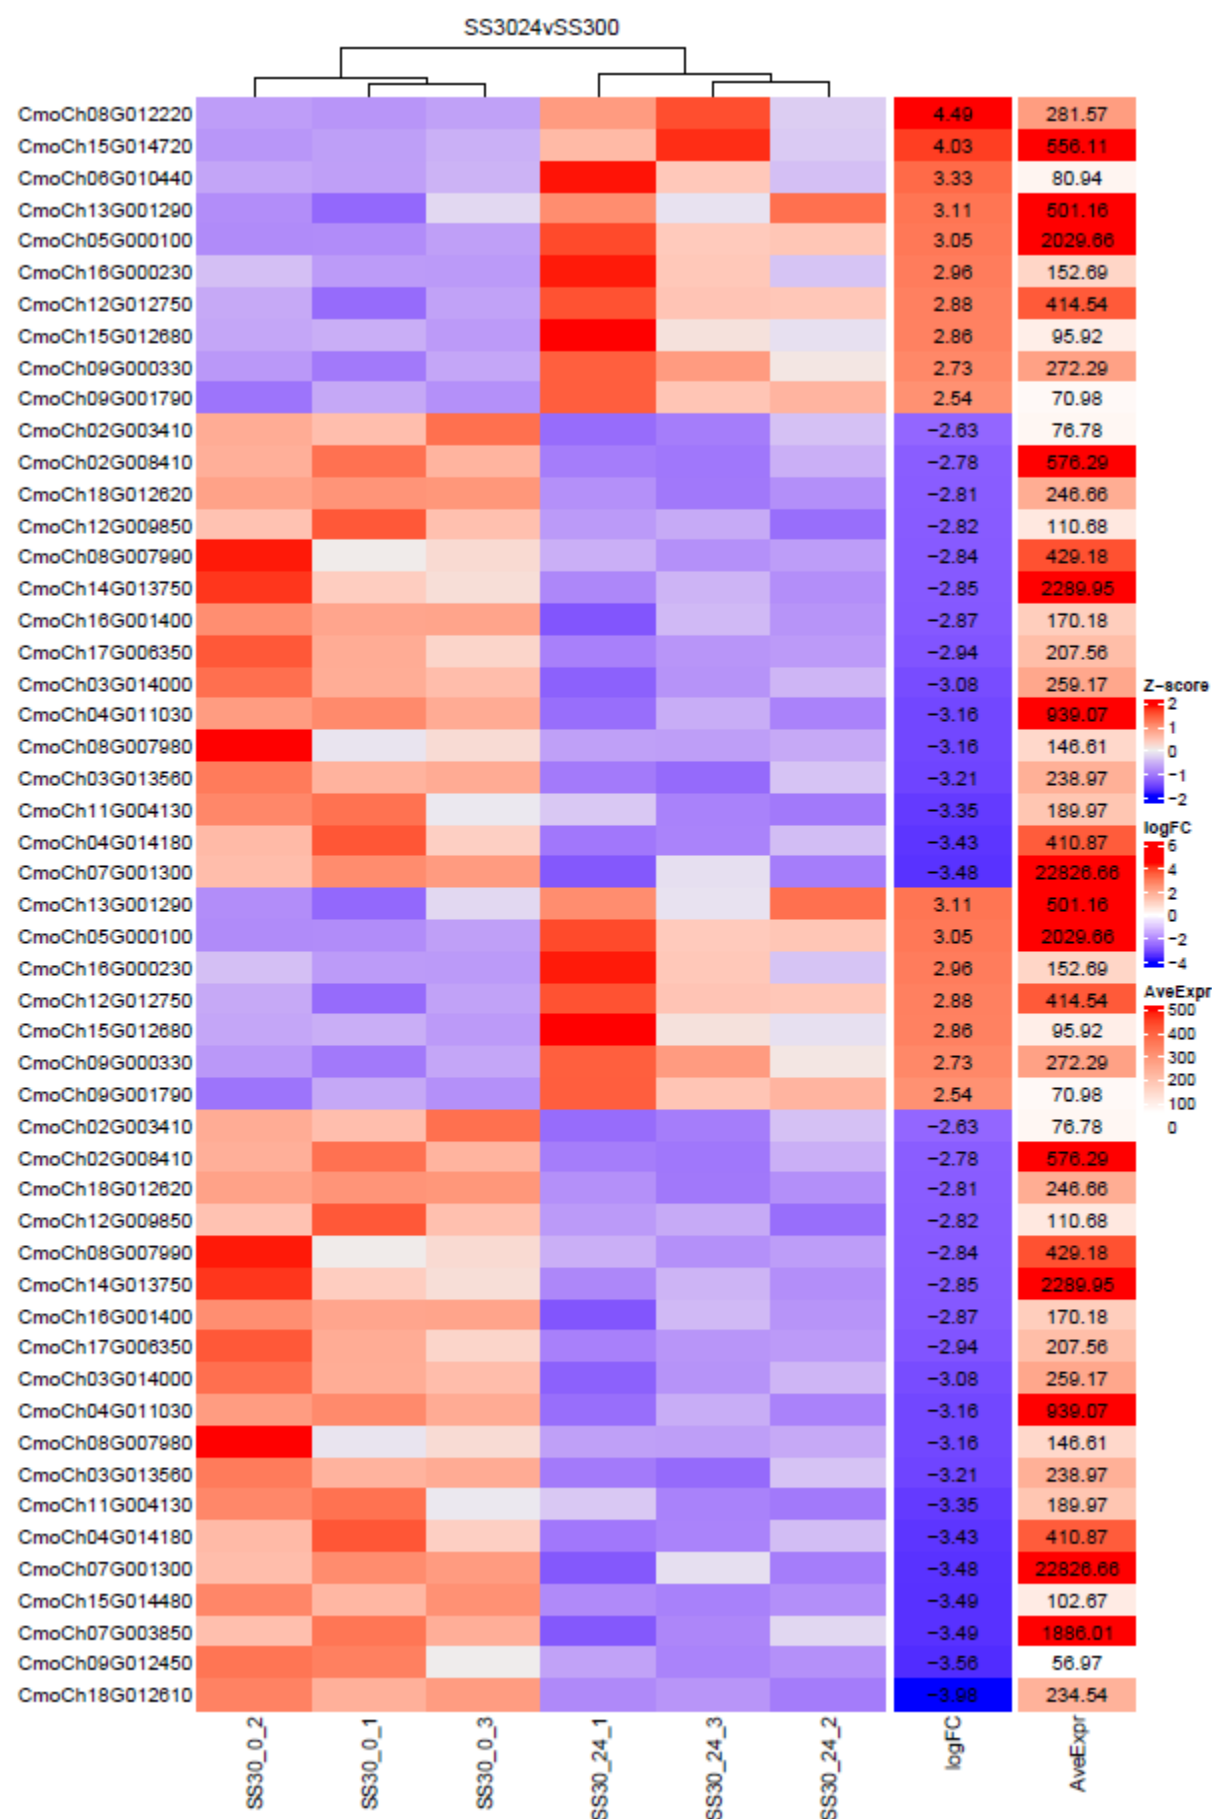

**Supplementary Figure S2C** Heat map for the top 25 upregulated and downregulated in 394-1-27-12 (coded as SS30) at 72 hours post inoculation (hpi).

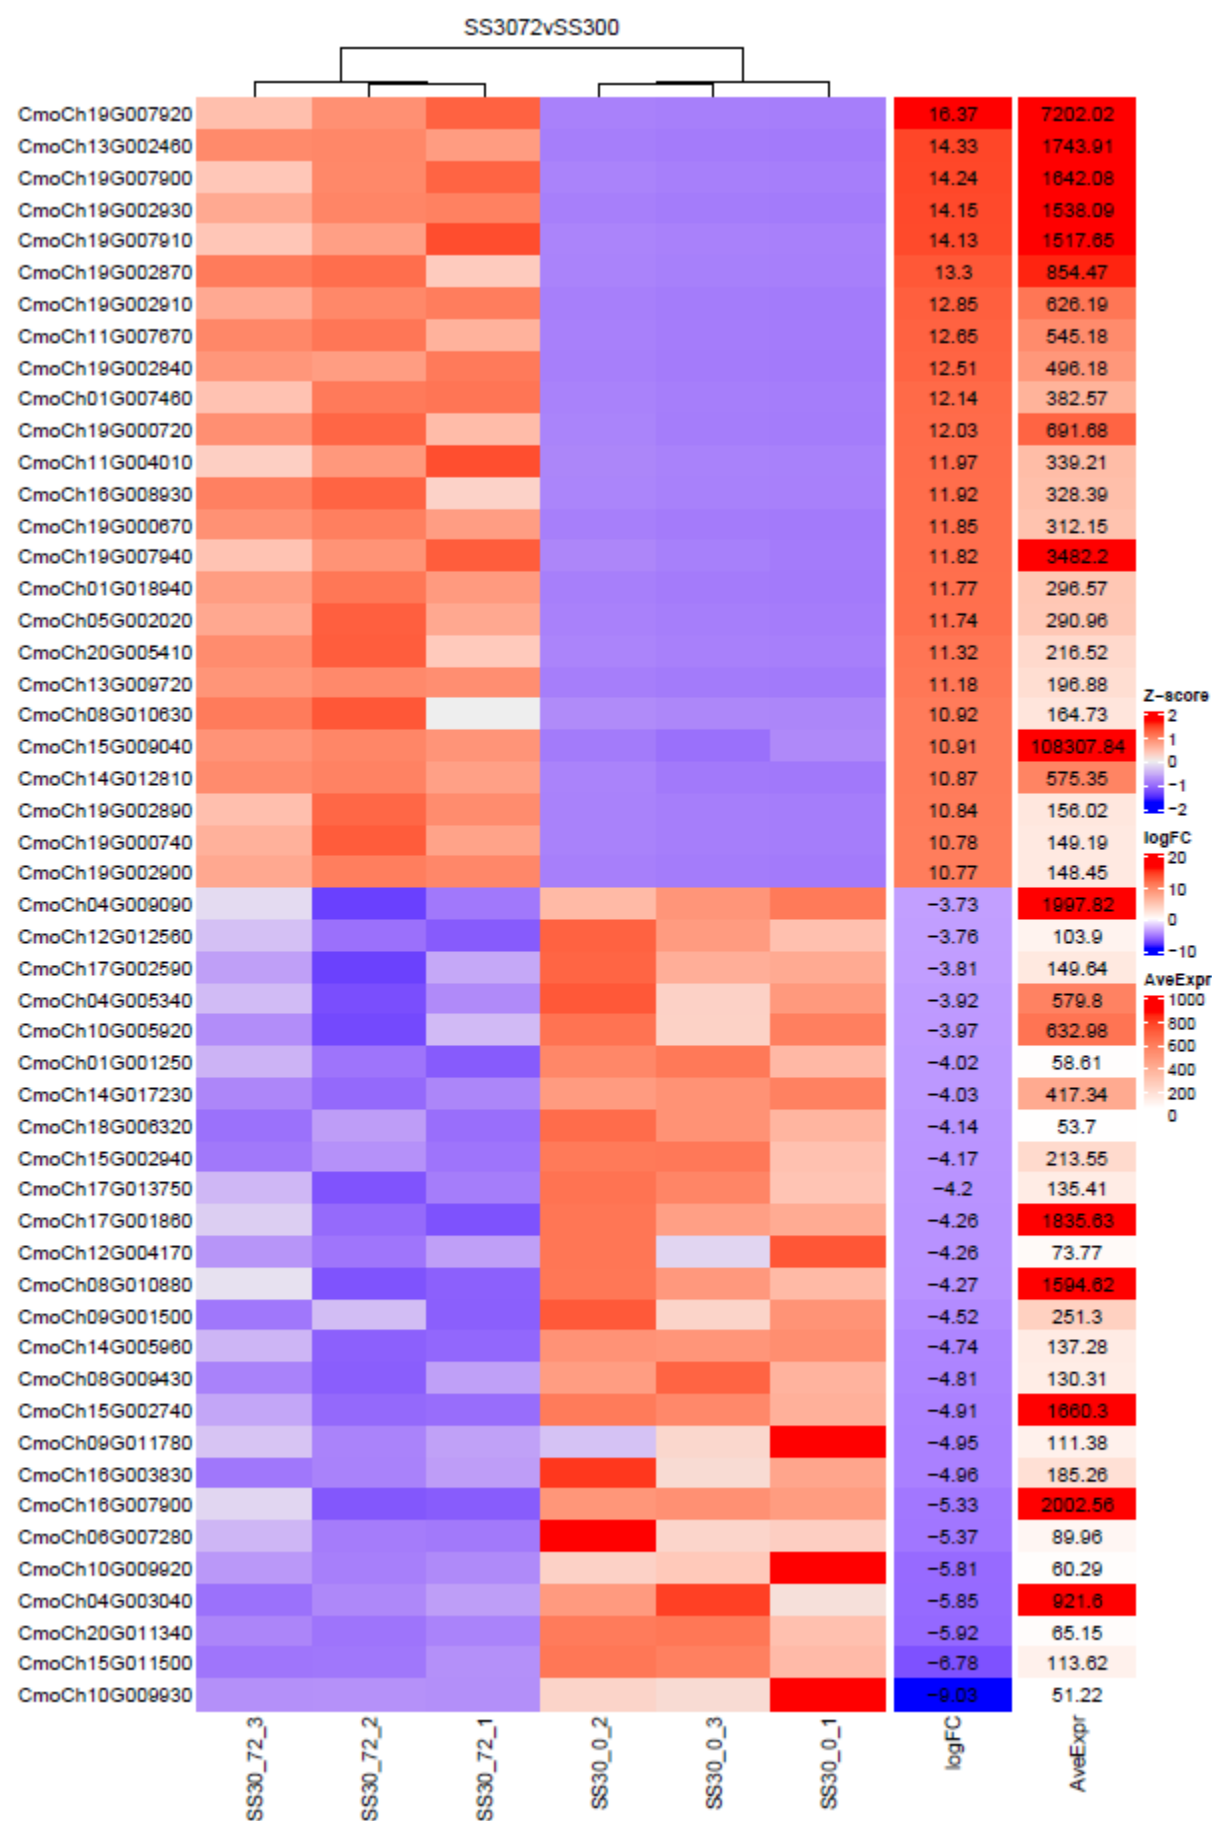

**Supplementary Figure S2D** Heat map for the top 25 upregulated and downregulated in 394-1-27-12 (coded as SS30) at 120 hours post inoculation (hpi).

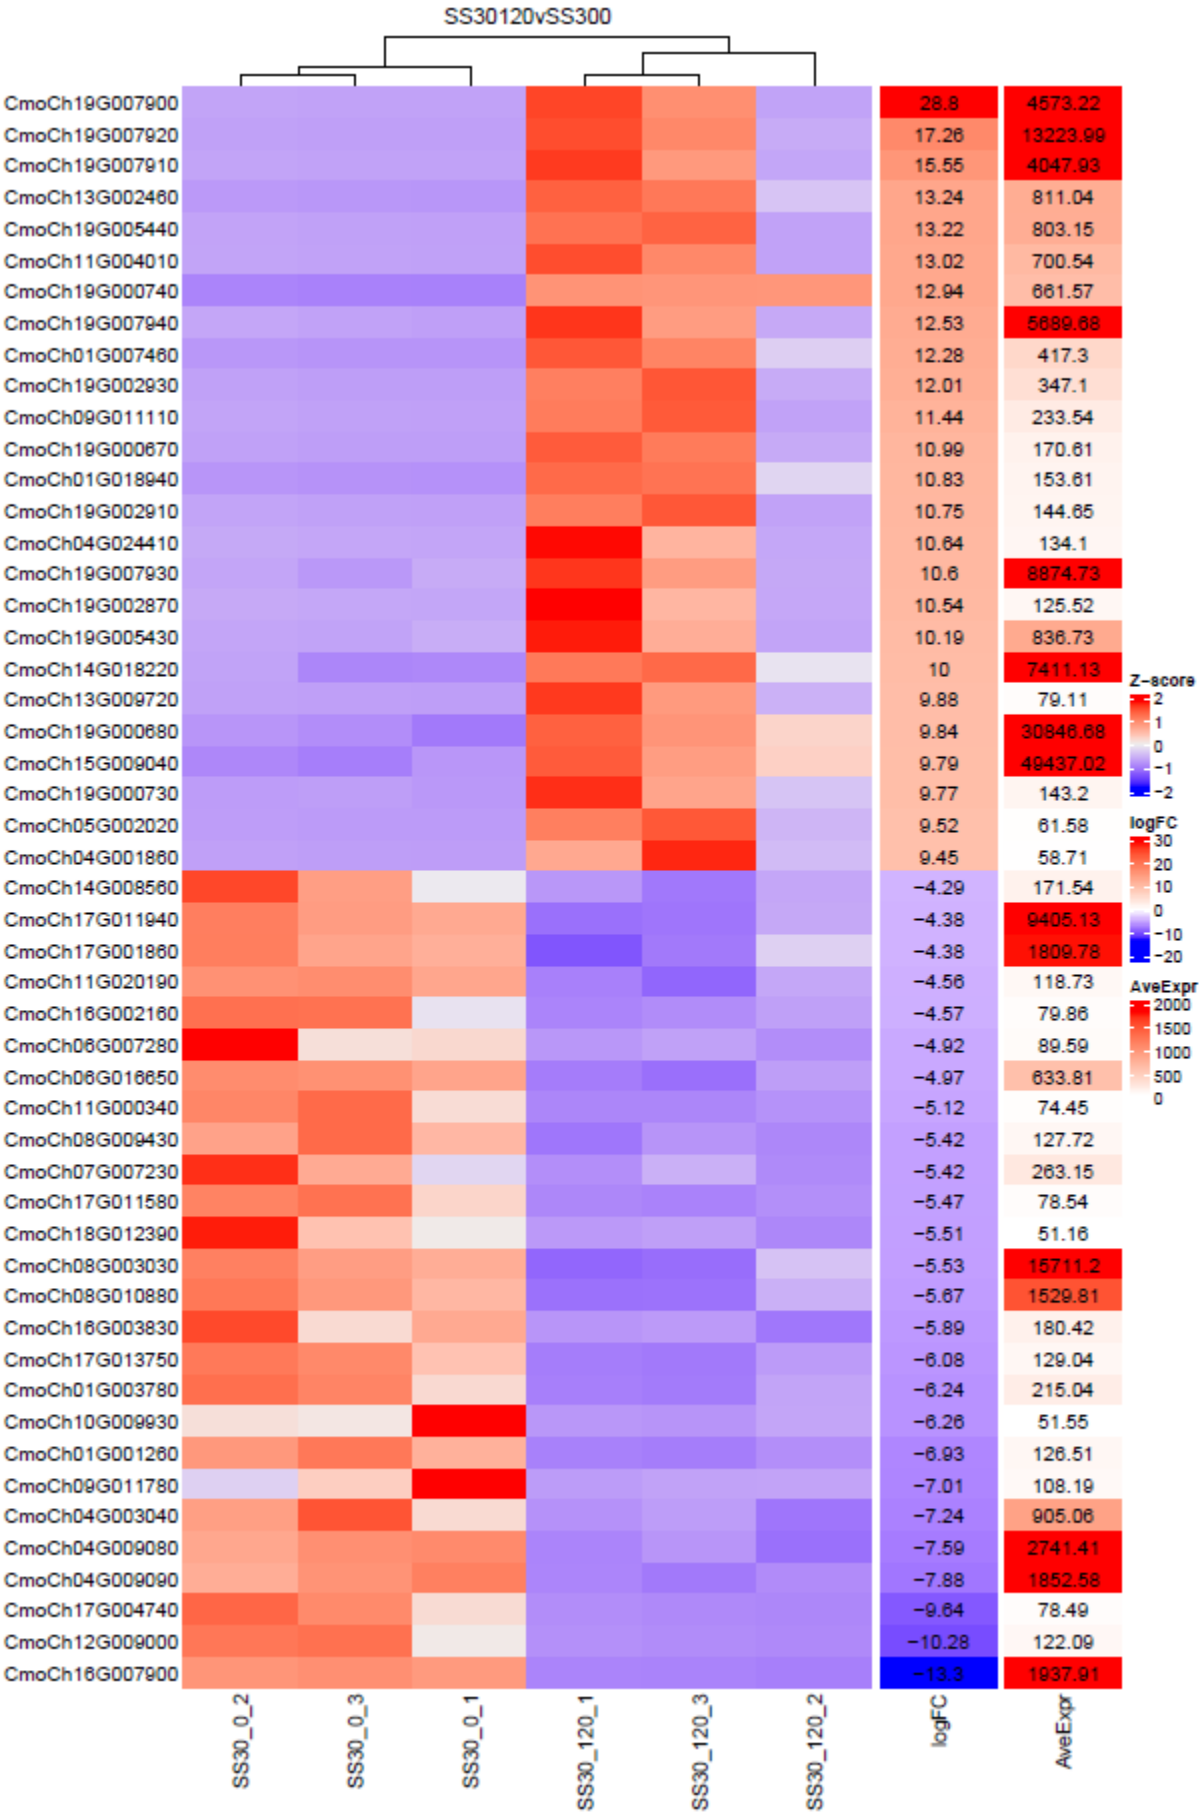

Supplement: s1 [file s1 › Supplementary Figure S2.pdf]
