# Supplementary material
Source: MDPI journal article supplement (https://www.mdpi.com/2673-7140/3/4/56)

**Supplementary Figure S3A** Heat map for the top 25 upregulated and downregulated in Butterbush (coded as BBT) at 12 hours post inoculation (hpi).

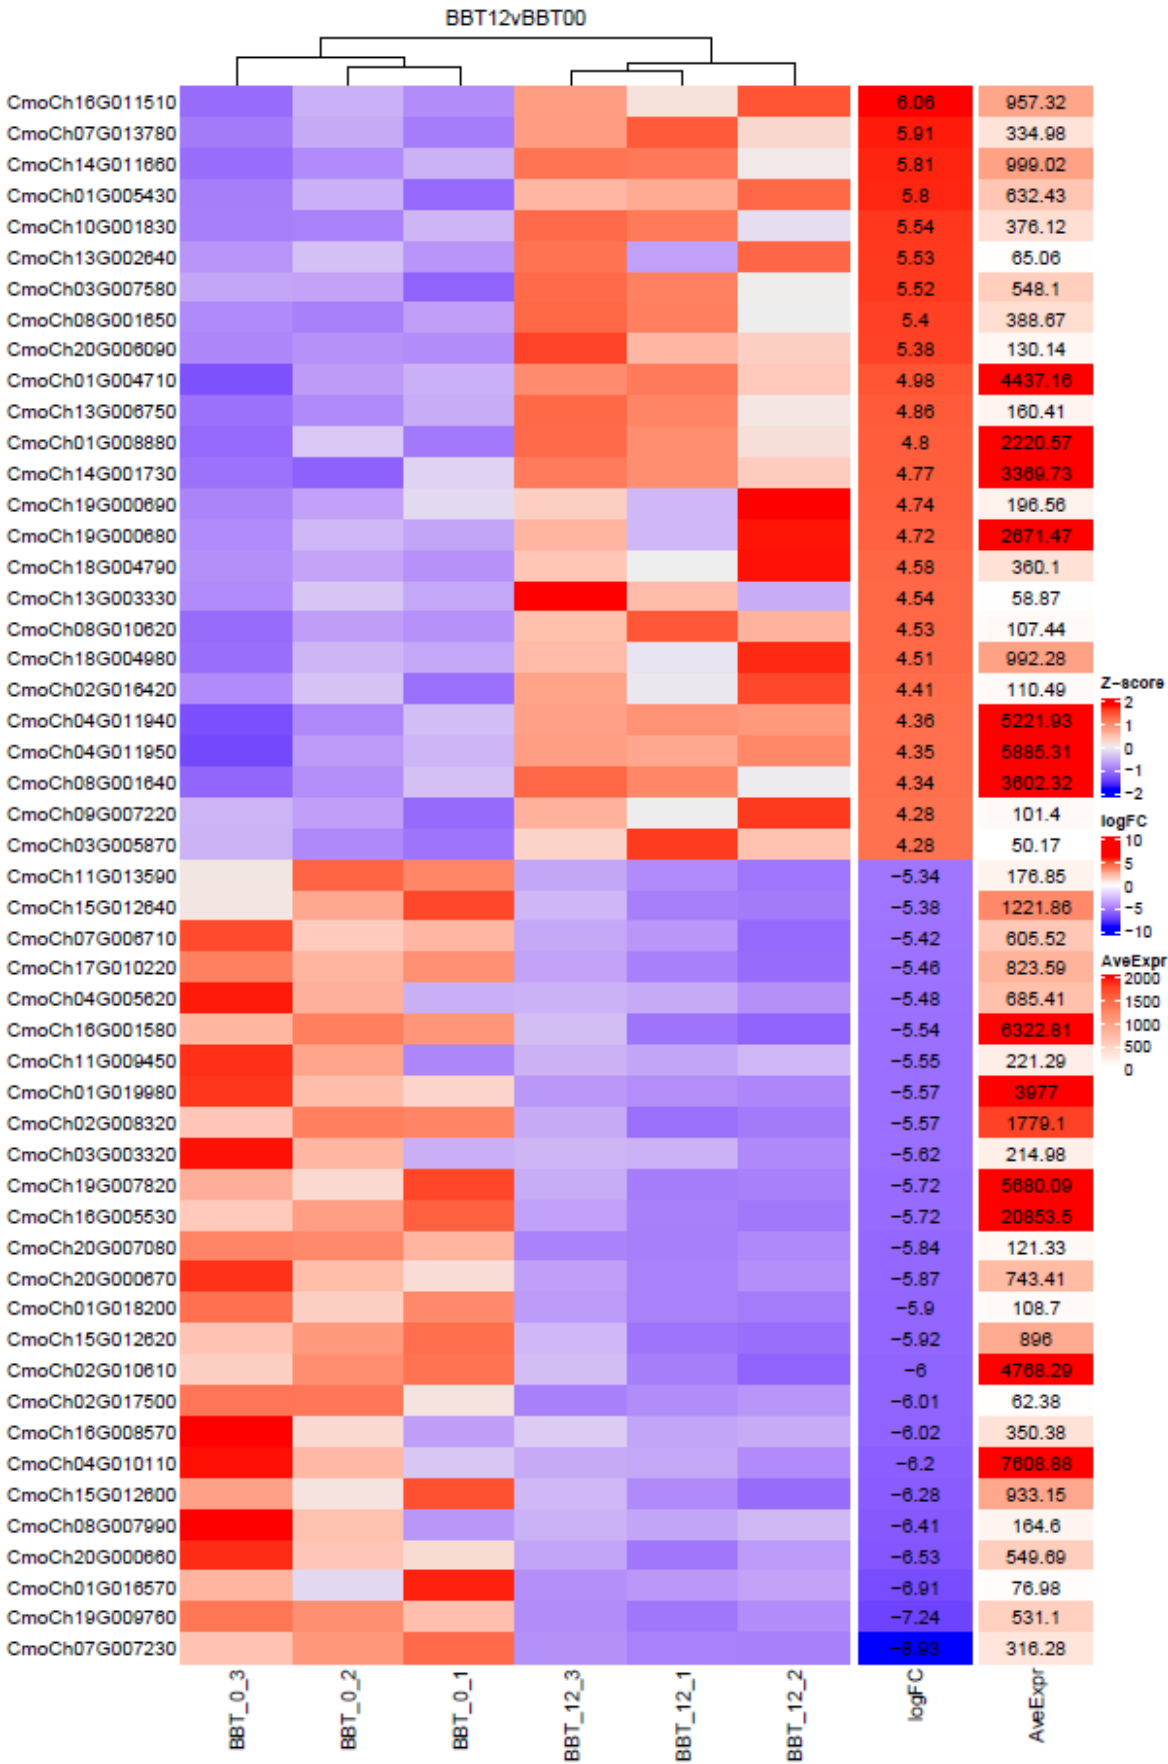

**Supplementary Figure S3B** Heat map for the top 25 upregulated and downregulated in Butterbush (coded as BBT) at 24 hours post inoculation (hpi).

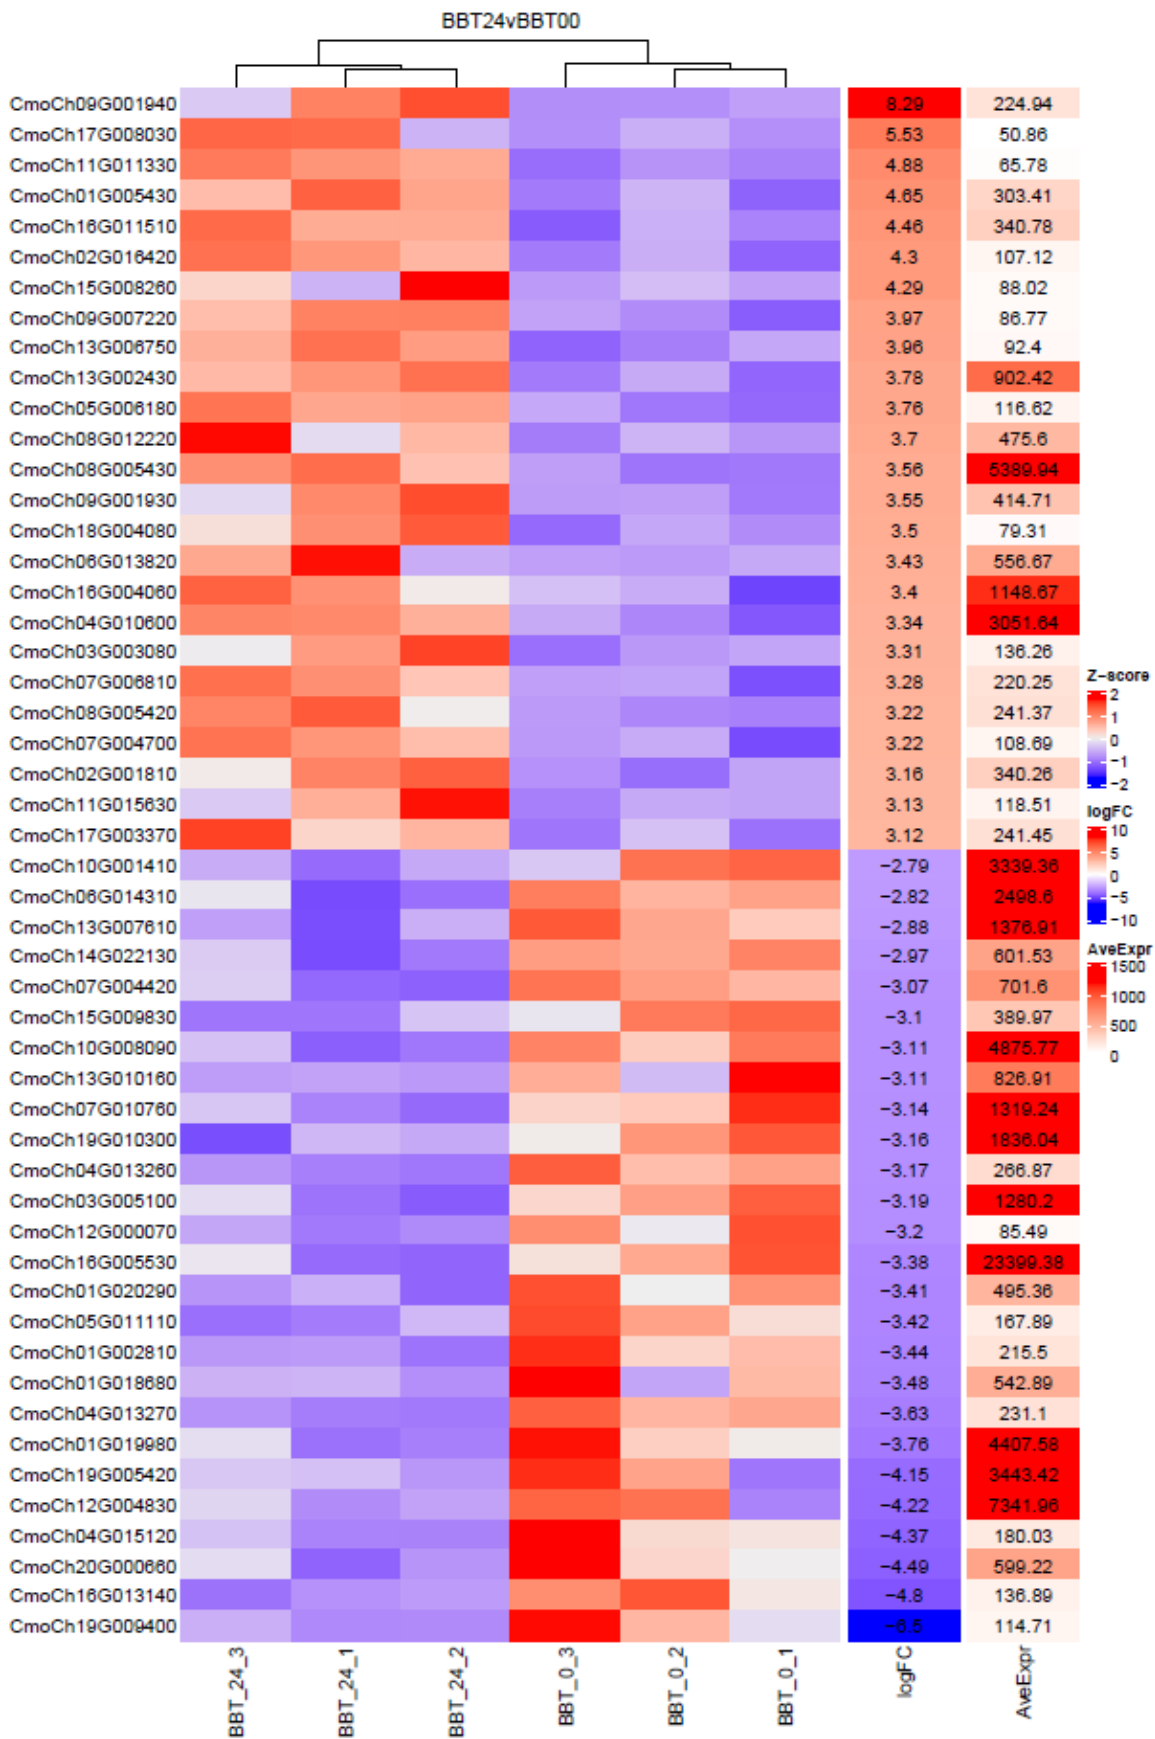

**Supplementary Figure S3C** Heat map for the top 25 upregulated and downregulated in Butterbush (coded as BBT) at 72 hours post inoculation (hpi).

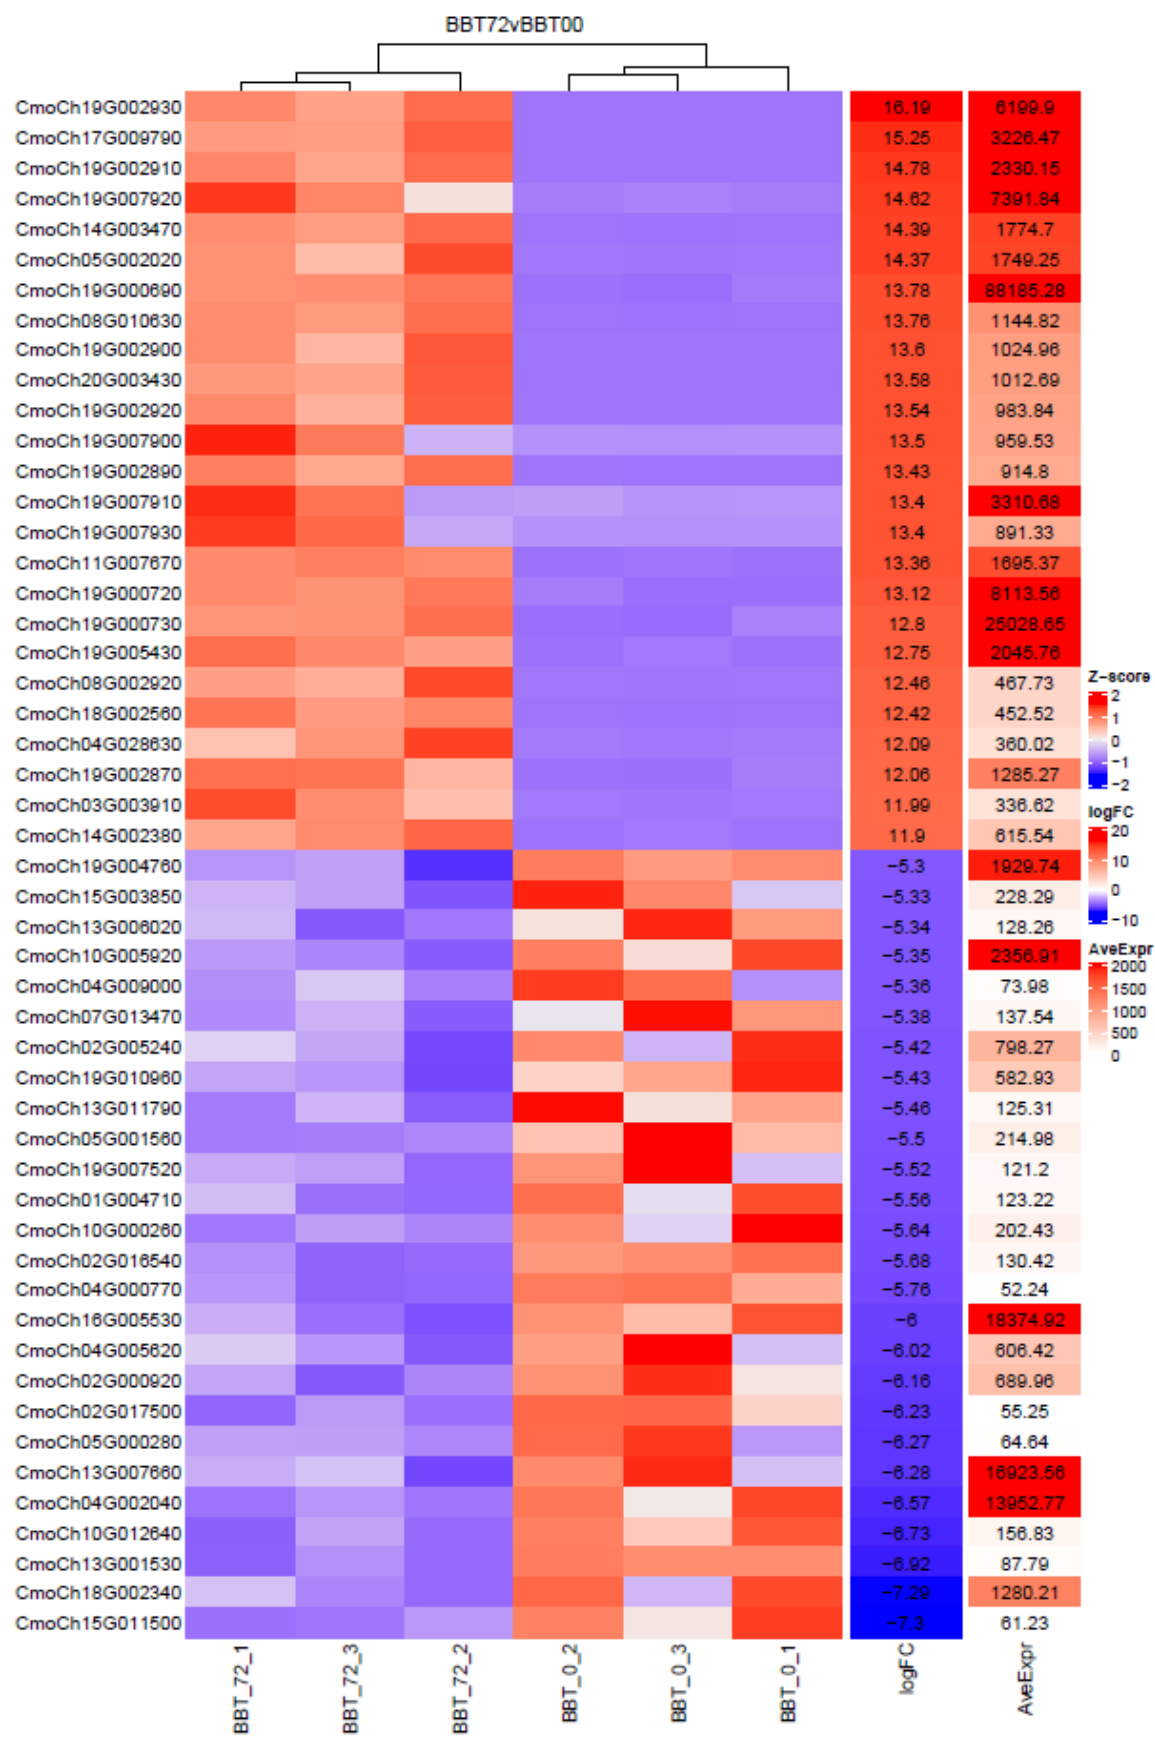

**Supplementary Figure S3D** Heat map for the top 25 upregulated and downregulated in Butterbush (coded as BBT) at 120 hours post inoculation (hpi).

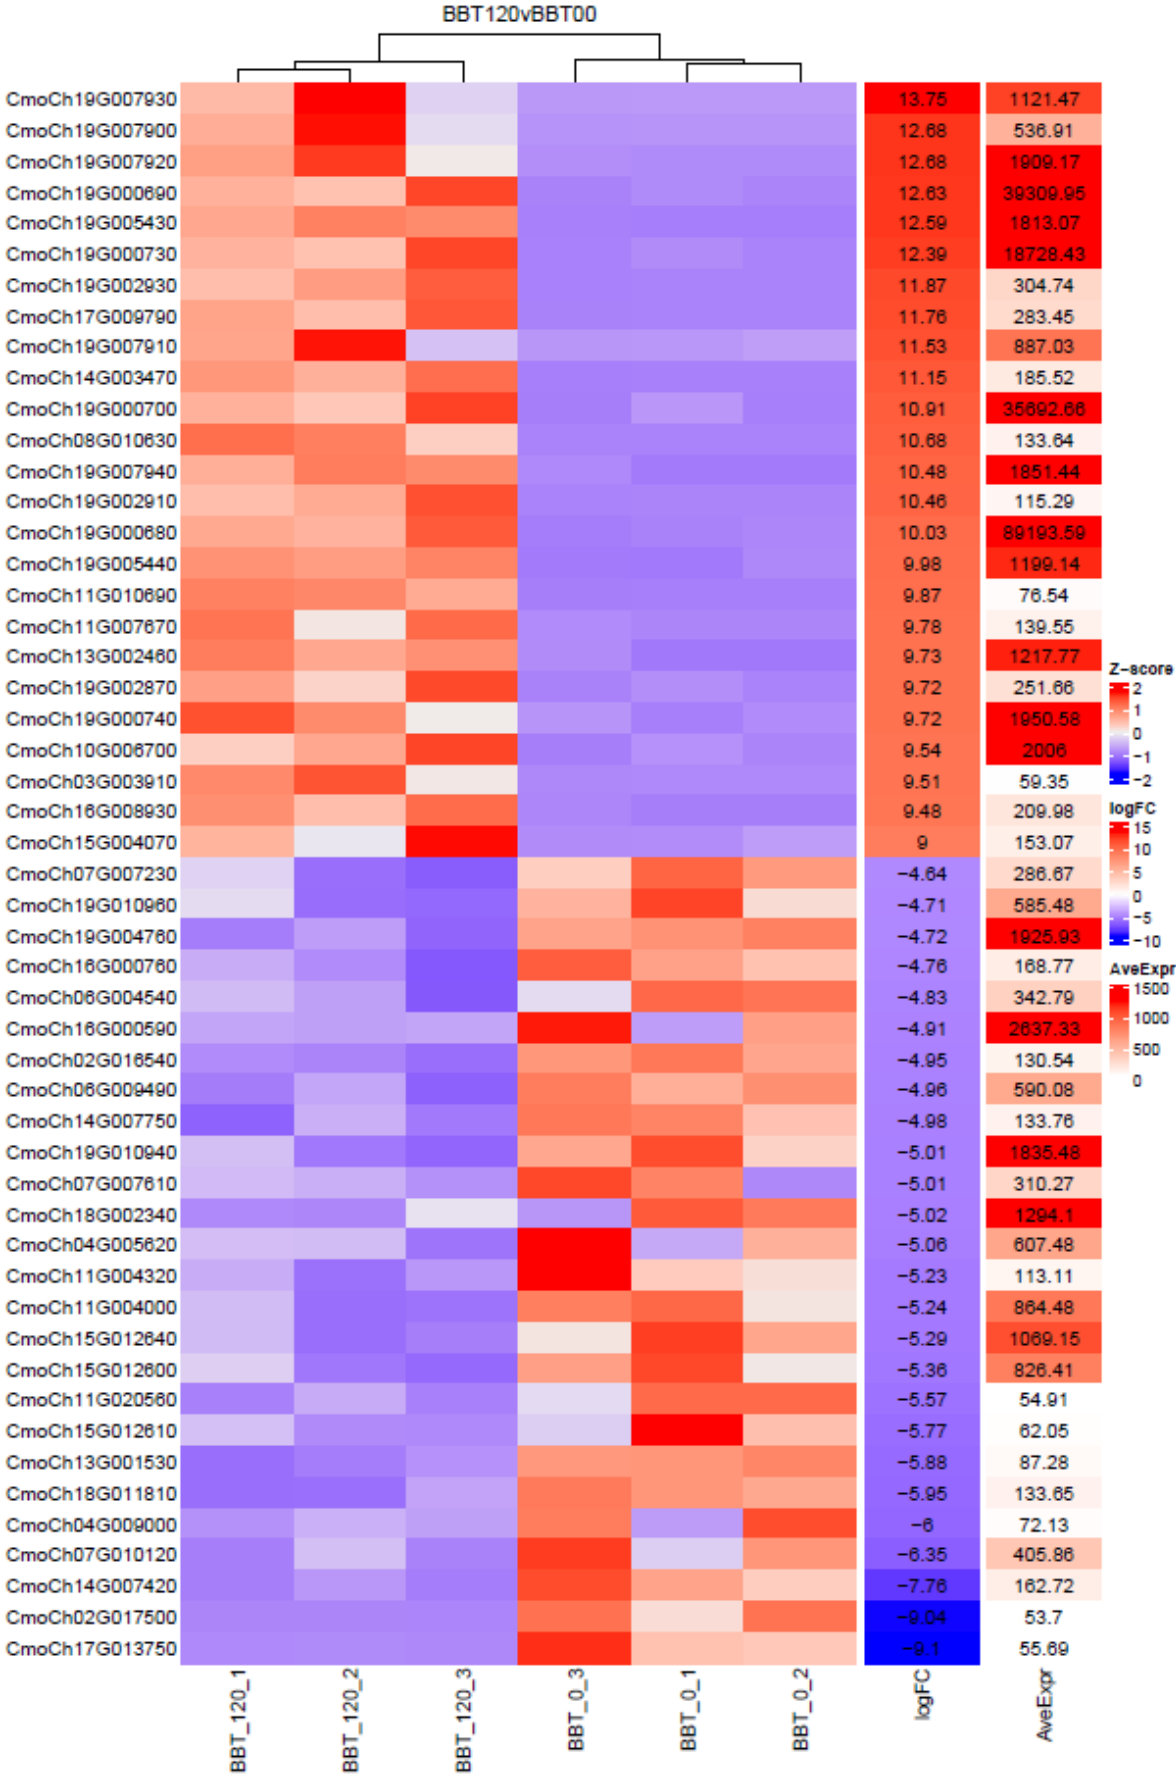

Supplement: s1 [file s1 › Supplementary Figure S3.pdf]
