# Supplementary material
Source: MDPI journal article supplement (https://www.mdpi.com/2673-7140/3/4/56)
Supplement: s1 [file s1 › Supplementary Table S1.xlsx]

## Sheet: QC
Supplementary Table S1 RNA library sequencing statistics, mapping rate and quality scores
Sample name	Raw reads. (Millions)	Clean reads (Millions)	Raw bases(G)	Clean bases(G)	Q20(%)	Q30(%)	GC content(%)
S1	41.8457	41.5968	6.27685	6.20285	97.5471	92.9129	45.6883
S2	41.5416	41.343	6.23124	6.16894	97.7342	93.345	45.3383
S3	41.625	41.4167	6.24376	6.16579	97.5996	93.0199	45.2913
S4	41.2315	41.0752	6.18472	6.11149	97.6722	93.1633	43.5825
S5	39.8741	39.7243	5.98111	5.92861	97.7134	93.2066	44.8726
S6	41.7981	41.5996	6.26971	6.2039	97.7815	93.3994	45.4119
S7	42.5108	42.272	6.37662	6.30419	97.4454	92.6325	45.3397
S8	42.3094	42.0566	6.3464	6.26566	97.568	92.9906	45.2875
S9	42.087	41.8093	6.31305	6.22699	97.5189	92.8546	45.1629
S10	39.4947	39.2462	5.92421	5.87267	97.3321	92.5198	45.2166
S11	42.1352	41.9098	6.32028	6.25235	97.6642	93.1491	45.0378
S12	41.6475	41.4295	6.24713	6.17858	97.5105	92.7976	45.1799
S13	41.3613	41.1606	6.2042	6.14227	97.6891	93.2079	44.8925
S14	46.1163	45.8256	6.91744	6.85948	97.2494	92.3141	45.4082
S15	41.8504	41.6414	6.27756	6.20922	97.5775	92.9757	45.2904
S16	41.6597	41.4759	6.24896	6.1478	97.6995	93.2268	43.4684
S17	41.8887	41.7116	6.28331	6.22871	97.6706	93.1624	44.875
S18	42.1066	41.9006	6.31598	6.24455	97.4849	92.752	45.3895
S19	40.5	38.4
S20	41.1	38.8
S21	44.4435	44.1791	6.66653	6.59343	97.5441	92.9242	45.0944
S22	54.197	53.9047	8.12954	8.04106	97.4576	92.6954	44.6747
S23	44.6743	44.3711	6.70115	6.61392	97.5024	92.8507	45.2306
S24	44.0237	43.7795	6.60356	6.53449	97.596	92.9937	44.643
S25	39.7812	39.5557	5.96718	5.90697	97.4897	92.7856	44.4383
S26	42.6944	42.4131	6.40416	6.32327	97.4394	92.6671	45.1202
S27	40.4524	40.2224	6.06786	6.00177	97.3538	92.45	44.3312
S28	39.7234	39.0749	5.89102	5.80701	97.5283	92.8523	43.9983
S29	41.5429	41.3244	6.23143	6.15136	97.4802	92.7986	45.6937
S30	43.6911	43.4694	6.55366	6.47893	97.4994	92.8404	44.822
	1269.91	1258.69
