# Supplementary material
Source: MDPI journal article supplement (https://www.mdpi.com/2673-7140/3/4/56)
Supplement: s1 [file s1 › Supplementary Table S2.xlsx]

## Sheet: All DEGs
Supplementary Table S2: Differentially expressed genes in 394-1-27-12 (here coded as SS30) and Butterbush (here coded as BBT)
Time Point	Gene ID	log2FoldChange	Gene Description
BBT12VS00	CmoCh07G007230	-8.92653	ethylene-responsive transcription factor ERF109-like
BBT12VS00	CmoCh04G020370	-8.12101	calmodulin-like
BBT12VS00	CmoCh19G008080	-7.99243	Arabidopsis protein of unknown function (DUF241)
BBT12VS00	CmoCh13G010000	-7.69787	Unknown protein
BBT12VS00	CmoCh20G000070	-7.26763	Protein of Unknown Function (DUF239)
BBT12VS00	CmoCh19G009760	-7.23798	Actin cytoskeleton-regulatory complex protein
BBT12VS00	CmoCh01G003940	-7.15788	DELLA protein
BBT12VS00	CmoCh01G016570	-6.91338	RNA-binding protein 38
BBT12VS00	CmoCh19G007780	-6.87269	O-methyltransferase family protein
BBT12VS00	CmoCh02G015610	-6.87266	Phytocyanin domain-containing protein
BBT12VS00	CmoCh11G018650	-6.86928	Calcium-binding EF-hand family protein
BBT12VS00	CmoCh20G000660	-6.53134	Lipoxygenase
BBT12VS00	CmoCh08G007990	-6.41408	FLZ-type domain-containing protein
BBT12VS00	CmoCh01G015430	-6.328	protein PHOX1-like isoform X1
BBT12VS00	CmoCh05G009030	-6.29408	Unknown protein
BBT12VS00	CmoCh15G012600	-6.28262	Unknown protein
BBT12VS00	CmoCh04G010110	-6.20368	Thiamine thiazole synthase, chloroplastic
BBT12VS00	CmoCh16G008570	-6.01516	phytohormone-binding protein-like
BBT12VS00	CmoCh02G017500	-6.00585	Flavin-containing monooxygenase
BBT12VS00	CmoCh02G010610	-6.00264	dehydration-responsive element-binding protein 1E-like
BBT12VS00	CmoCh15G012620	-5.92319	ethylene-responsive transcription factor ERF027-like
BBT12VS00	CmoCh01G018200	-5.90159	Unknown protein
BBT12VS00	CmoCh20G000670	-5.8653	Lipoxygenase
BBT12VS00	CmoCh09G012820	-5.8397	ethylene-responsive transcription factor ERF021-like
BBT12VS00	CmoCh20G007080	-5.83797	amino acid transporter AVT3B-like
BBT12VS00	CmoCh18G012610	-5.82331	Unknown protein
BBT12VS00	CmoCh14G002000	-5.81879	Unknown protein
BBT12VS00	CmoCh16G005530	-5.72382	abscisic acid 8'-hydroxylase 1-like
BBT12VS00	CmoCh19G007820	-5.71835	L-ascorbate oxidase homolog
BBT12VS00	CmoCh03G003320	-5.62224	macrophage migration inhibitory factor homolog
BBT12VS00	CmoCh02G008320	-5.57458	zinc finger protein ZAT11-like
BBT12VS00	CmoCh01G019980	-5.56838	Thioredoxin
BBT12VS00	CmoCh11G009450	-5.54888	Flowering locus T-like 1
BBT12VS00	CmoCh16G001580	-5.54039	dehydration-responsive element-binding protein 1A-like
BBT12VS00	CmoCh19G004060	-5.50541	expansin-like B1
BBT12VS00	CmoCh04G005620	-5.48148	nigrin b-like isoform X1
BBT12VS00	CmoCh17G010220	-5.46159	DUF761 domain-containing protein
BBT12VS00	CmoCh07G006710	-5.42076	Peroxidase
BBT12VS00	CmoCh15G012640	-5.38273	Protein DETOXIFICATION
BBT12VS00	CmoCh11G013590	-5.34269	Ethylene-responsive transcription factor
BBT12VS00	CmoCh16G001500	-5.3194	S-adenosyl-L-methionine-dependent methyltransferases superfamily protein
BBT12VS00	CmoCh05G004170	-5.30749	HCO3- transporter family
BBT12VS00	CmoCh02G003500	-5.29897	auxin-responsive protein SAUR21-like
BBT12VS00	CmoCh07G010120	-5.24939	Plant protein 1589 of unknown function
BBT12VS00	CmoCh11G004000	-5.24481	Xyloglucan endotransglucosylase/hydrolase
BBT12VS00	CmoCh05G001560	-5.23849	Gibberellin-regulated protein
BBT12VS00	CmoCh01G008960	-5.21634	ethylene-responsive transcription factor ERF022-like
BBT12VS00	CmoCh04G024610	-5.21435	ethylene-responsive transcription factor ERF014
BBT12VS00	CmoCh19G010960	-5.17918	Unknown protein
BBT12VS00	CmoCh19G009770	-5.16069	fasciclin-like arabinogalactan protein 21
BBT12VS00	CmoCh01G018210	-5.14539	Cellulose synthase-like protein
BBT12VS00	CmoCh17G001760	-5.13124	transcription factor bHLH92
BBT12VS00	CmoCh17G009490	-5.05265	UPF0496 protein 4-like
BBT12VS00	CmoCh19G009400	-5.04373	S-type anion channel SLAH1-like
BBT12VS00	CmoCh07G007610	-4.90957	HTH-type transcriptional regulator protein ptxE
BBT12VS00	CmoCh01G018220	-4.90808	Unknown protein
BBT12VS00	CmoCh01G004470	-4.89652	Unknown protein
BBT12VS00	CmoCh04G015120	-4.89048	cucumisin-like
BBT12VS00	CmoCh04G005340	-4.84114	ethylene-responsive transcription factor ERF109-like
BBT12VS00	CmoCh13G005560	-4.83256	protein TIFY 5A-like
BBT12VS00	CmoCh06G010490	-4.8183	WRKY domain-containing protein
BBT12VS00	CmoCh20G006300	-4.78512	Unknown protein
BBT12VS00	CmoCh13G005600	-4.78039	protein TIFY 5A-like
BBT12VS00	CmoCh06G005470	-4.76423	fasciclin-like arabinogalactan protein 17
BBT12VS00	CmoCh19G010950	-4.69956	Xyloglucan endotransglucosylase/hydrolase
BBT12VS00	CmoCh19G010930	-4.69556	Xyloglucan endotransglucosylase/hydrolase
BBT12VS00	CmoCh11G013770	-4.66551	CBS domain-containing protein CBSX1, chloroplastic
BBT12VS00	CmoCh11G019340	-4.6601	Wound-responsive family protein
BBT12VS00	CmoCh16G009250	-4.59978	Auxin-responsive GH3 family protein
BBT12VS00	CmoCh11G004320	-4.58003	UDP-glucuronate 4-epimerase 4
BBT12VS00	CmoCh07G003260	-4.53053	1-aminocyclopropane-1-carboxylate oxidase
BBT12VS00	CmoCh13G010010	-4.51436	Arf-GAP domain-containing protein
BBT12VS00	CmoCh03G010670	-4.50687	pollen-specific leucine-rich repeat extensin-like protein 1
BBT12VS00	CmoCh04G013940	-4.45666	sigma factor binding protein 1, chloroplastic-like
BBT12VS00	CmoCh09G003110	-4.44692	Cellulose synthase-like protein
BBT12VS00	CmoCh11G007230	-4.40549	DDE Tnp4 domain-containing protein
BBT12VS00	CmoCh07G010520	-4.37071	Avr9/Cf-9 rapidly elicited protein
BBT12VS00	CmoCh01G004500	-4.36188	Unknown protein
BBT12VS00	CmoCh18G004040	-4.31472	Rho_N domain-containing protein
BBT12VS00	CmoCh12G001130	-4.30795	pollen-specific protein C13-like
BBT12VS00	CmoCh04G011860	-4.30522	Elf4 domain-containing protein
BBT12VS00	CmoCh19G010940	-4.29753	Xyloglucan endotransglucosylase/hydrolase
BBT12VS00	CmoCh01G015350	-4.28848	ethylene-responsive transcription factor ERF003-like
BBT12VS00	CmoCh15G012610	-4.28285	dehydration-responsive element-binding protein 1A-like
BBT12VS00	CmoCh10G007630	-4.24655	DDE Tnp4 domain-containing protein
BBT12VS00	CmoCh14G005040	-4.23627	cytochrome P450 94A1-like
BBT12VS00	CmoCh09G009110	-4.22983	Unknown protein
BBT12VS00	CmoCh17G007330	-4.20715	Histidine phosphotransfer protein
BBT12VS00	CmoCh10G004350	-4.19621	Xyloglucan endotransglucosylase/hydrolase
BBT12VS00	CmoCh18G012680	-4.19307	remorin
BBT12VS00	CmoCh02G018590	-4.17773	Unknown protein
BBT12VS00	CmoCh06G004540	-4.16235	ethylene-responsive transcription factor ERF024-like
BBT12VS00	CmoCh01G000670	-4.14472	Unknown protein
BBT12VS00	CmoCh01G002370	-4.11451	Unknown protein
BBT12VS00	CmoCh15G001670	-4.1071	HIG1 domain-containing protein
BBT12VS00	CmoCh04G013270	-4.09005	J domain-containing protein
BBT12VS00	CmoCh07G010300	-4.08136	dof zinc finger protein 4-like
BBT12VS00	CmoCh04G028930	-4.06551	MYB transcription factor
BBT12VS00	CmoCh04G024050	-4.03495	Unknown protein
BBT12VS00	CmoCh10G008090	-4.02327	protein TIFY 10a-like
BBT12VS00	CmoCh11G002890	-4.00467	Unknown protein
BBT12VS00	CmoCh04G027710	-4.00156	Protein kinase
BBT12VS00	CmoCh09G012770	-3.99922	ethylene-responsive transcription factor ERF022-like
BBT12VS00	CmoCh08G009430	-3.98585	Very-long-chain aldehyde decarbonylase GL1-1
BBT12VS00	CmoCh11G014150	-3.96925	zinc finger protein ZAT10
BBT12VS00	CmoCh20G004110	-3.96852	Tropomyosin
BBT12VS00	CmoCh04G001880	-3.95668	Mitochondrial substrate carrier family protein
BBT12VS00	CmoCh03G010660	-3.9473	WAT1-related protein
BBT12VS00	CmoCh08G012000	-3.94494	protein RALF-like 33
BBT12VS00	CmoCh06G006050	-3.94214	ELL-associated factor 1-like
BBT12VS00	CmoCh03G008720	-3.93658	Integrase catalytic domain-containing protein
BBT12VS00	CmoCh11G018980	-3.92494	ThiF domain-containing protein
BBT12VS00	CmoCh09G003130	-3.92253	Unknown protein
BBT12VS00	CmoCh07G010760	-3.91306	Unknown protein
BBT12VS00	CmoCh20G004640	-3.91094	zinc finger protein ZAT12-like
BBT12VS00	CmoCh16G001410	-3.89092	heat stress transcription factor B-2b-like
BBT12VS00	CmoCh11G008150	-3.89028	Late embryogenesis abundant (LEA) hydroxyproline-rich glycoprotein family
BBT12VS00	CmoCh15G012860	-3.88792	Glutathione peroxidase
BBT12VS00	CmoCh14G003440	-3.87843	Eukaryotic aspartyl protease family protein
BBT12VS00	CmoCh01G020290	-3.86976	gibberellin-regulated protein 1-like
BBT12VS00	CmoCh04G001040	-3.85798	Expansin
BBT12VS00	CmoCh16G006580	-3.8501	DUF4228 domain-containing protein
BBT12VS00	CmoCh02G002510	-3.83854	Senescence domain-containing protein
BBT12VS00	CmoCh18G013450	-3.82401	Retrovirus-related Pol polyprotein from transposon RE1
BBT12VS00	CmoCh07G001010	-3.81434	protein TIFY 5A-like
BBT12VS00	CmoCh10G008120	-3.81421	ethylene-responsive transcription factor ERF017
BBT12VS00	CmoCh09G005520	-3.80758	RNA-binding protein 38-like
BBT12VS00	CmoCh01G001370	-3.80266	acyl-protein thioesterase 2-like
BBT12VS00	CmoCh02G012190	-3.7936	NDR1/HIN1-like protein 13
BBT12VS00	CmoCh09G000710	-3.78689	Large proline-rich protein bag6-B isoform X1
BBT12VS00	CmoCh09G009100	-3.7819	scarecrow-like protein 21
BBT12VS00	CmoCh16G000760	-3.77549	arabinogalactan peptide 22-like
BBT12VS00	CmoCh04G012660	-3.76982	(1->3)-beta-glucan endohydrolase
BBT12VS00	CmoCh08G009220	-3.76976	Unknown protein
BBT12VS00	CmoCh19G008550	-3.76861	Unknown protein
BBT12VS00	CmoCh05G008870	-3.76586	Unknown protein
BBT12VS00	CmoCh03G009530	-3.75602	Calcium-transporting ATPase
BBT12VS00	CmoCh11G018440	-3.75427	Cytochrome b561 and DOMON domain-containing protein
BBT12VS00	CmoCh16G001420	-3.74809	heat stress transcription factor B-2b-like
BBT12VS00	CmoCh01G002810	-3.74166	transcription factor MYB78-like
BBT12VS00	CmoCh13G008420	-3.74105	Unknown protein
BBT12VS00	CmoCh02G002450	-3.74005	protein NUCLEAR FUSION DEFECTIVE 4-like
BBT12VS00	CmoCh11G003140	-3.73328	Calcium-binding EF-hand family protein
BBT12VS00	CmoCh04G021550	-3.723	Regulator of Vps4 activity in the MVB pathway protein, putative
BBT12VS00	CmoCh09G006490	-3.72201	DUF641 domain-containing protein
BBT12VS00	CmoCh11G007650	-3.72179	ethylene-responsive transcription factor ERF017-like
BBT12VS00	CmoCh10G005560	-3.71303	Exostosin family protein
BBT12VS00	CmoCh03G005100	-3.70812	F-box protein
BBT12VS00	CmoCh14G022130	-3.68654	homeobox-leucine zipper protein HAT3-like
BBT12VS00	CmoCh13G001240	-3.68247	(1->3)-beta-glucan endohydrolase
BBT12VS00	CmoCh01G001920	-3.66673	WRKY protein
BBT12VS00	CmoCh10G011570	-3.66124	Root phototropism protein 3-like isoform X1
BBT12VS00	CmoCh14G015150	-3.65465	calmodulin-like protein 3
BBT12VS00	CmoCh04G013260	-3.65424	Thioredoxin-like protein YLS8
BBT12VS00	CmoCh17G003110	-3.64375	protein RALF-like 33
BBT12VS00	CmoCh12G000250	-3.63815	Protein-serine/threonine phosphatase
BBT12VS00	CmoCh19G010590	-3.63396	Phosphoenolpyruvate carboxylase
BBT12VS00	CmoCh16G001560	-3.62395	Protein DETOXIFICATION
BBT12VS00	CmoCh11G017690	-3.61202	expansin-like A2
BBT12VS00	CmoCh06G002720	-3.60732	Receptor-like serine/threonine-protein kinase
BBT12VS00	CmoCh08G008560	-3.60684	Delta(8)-fatty-acid desaturase
BBT12VS00	CmoCh18G008090	-3.60159	Xyloglucan endotransglucosylase/hydrolase
BBT12VS00	CmoCh09G003250	-3.5794	Core-2/I-branching beta-1,6-N-acetylglucosaminyltransferase family protein
BBT12VS00	CmoCh13G005010	-3.56066	patellin-4
BBT12VS00	CmoCh14G006670	-3.55933	Protein of unknown function (DUF1645)
BBT12VS00	CmoCh04G022010	-3.55718	Ribose-5-phosphate isomerase
BBT12VS00	CmoCh16G008660	-3.55154	Wound-responsive family protein
BBT12VS00	CmoCh13G000930	-3.54112	Copper transporter
BBT12VS00	CmoCh07G007160	-3.54088	mitogen-activated protein kinase kinase kinase 17-like
BBT12VS00	CmoCh06G010040	-3.53201	homeobox-leucine zipper protein HAT3-like
BBT12VS00	CmoCh14G002260	-3.51963	zinc finger protein ZAT5-like
BBT12VS00	CmoCh11G004910	-3.51594	BEST Arabidopsis thaliana protein match is: NHL domain-containing protein .
BBT12VS00	CmoCh04G026910	-3.51413	protein ENHANCED DISEASE RESISTANCE 2-like
BBT12VS00	CmoCh01G006860	-3.50979	Phosphomethylpyrimidine synthase
BBT12VS00	CmoCh03G009080	-3.50015	transcription factor bHLH19-like
BBT12VS00	CmoCh01G007060	-3.49209	Protein-serine/threonine phosphatase
BBT12VS00	CmoCh17G011100	-3.48595	RNA-binding protein BRN1-like
BBT12VS00	CmoCh06G002100	-3.48357	Pyruvate decarboxylase
BBT12VS00	CmoCh04G003910	-3.48033	Cyclin
BBT12VS00	CmoCh02G013980	-3.45465	UDP-D-apiose/UDP-D-xylose synthase 2
BBT12VS00	CmoCh05G011000	-3.45281	dnaJ homolog subfamily B member 8-like
BBT12VS00	CmoCh05G003820	-3.45039	C2 NT-type domain-containing protein
BBT12VS00	CmoCh06G009850	-3.4497	Late cornified envelope protein 1E
BBT12VS00	CmoCh12G012710	-3.44373	leucine-rich repeat extensin-like protein 4
BBT12VS00	CmoCh07G006400	-3.44323	Unknown protein
BBT12VS00	CmoCh18G013490	-3.43425	Unknown protein
BBT12VS00	CmoCh01G008340	-3.43145	Chlorophyll a-b binding protein, chloroplastic
BBT12VS00	CmoCh08G007910	-3.42882	DnaJ-like protein subfamily B member 6-like
BBT12VS00	CmoCh07G013480	-3.42774	Unknown protein
BBT12VS00	CmoCh06G015490	-3.42746	COBRA-like protein 7
BBT12VS00	CmoCh19G001910	-3.42739	ninja-family protein 4-like
BBT12VS00	CmoCh01G002360	-3.41141	Protein DETOXIFICATION
BBT12VS00	CmoCh07G010770	-3.39726	phosphatidylinositol:ceramide inositolphosphotransferase 2-like
BBT12VS00	CmoCh01G011900	-3.39709	Lipocln_cytosolic_FA-bd_dom domain-containing protein
BBT12VS00	CmoCh01G013100	-3.39685	Plant protein of unknown function (DUF641)
BBT12VS00	CmoCh04G015830	-3.39574	ethylene-responsive transcription factor ERF118-like
BBT12VS00	CmoCh05G005300	-3.3945	protein EXORDIUM-like
BBT12VS00	CmoCh10G004790	-3.38952	histone-lysine N-methyltransferase ASHR3-like isoform X2
BBT12VS00	CmoCh02G013060	-3.38342	Phosphotransferase
BBT12VS00	CmoCh09G002010	-3.38062	transcription factor MYB44-like
BBT12VS00	CmoCh11G018760	-3.36609	fasciclin-like arabinogalactan protein 13
BBT12VS00	CmoCh16G002050	-3.36574	Trehalose 6-phosphate phosphatase
BBT12VS00	CmoCh02G004730	-3.36263	Cellulose synthase-like protein
BBT12VS00	CmoCh08G004970	-3.34707	protein BPS1, chloroplastic-like
BBT12VS00	CmoCh15G001750	-3.34179	Unknown protein
BBT12VS00	CmoCh14G012240	-3.34034	protein TIFY 10b-like
BBT12VS00	CmoCh18G005100	-3.33811	UDP-arabinose 4-epimerase 1-like
BBT12VS00	CmoCh14G010440	-3.3227	O-fucosyltransferase family protein
BBT12VS00	CmoCh02G009490	-3.31602	NADP-specific glutamate dehydrogenase, putative
BBT12VS00	CmoCh19G009840	-3.31273	transcription factor MYB4-like
BBT12VS00	CmoCh20G007960	-3.29989	auxin-responsive protein SAUR24-like
BBT12VS00	CmoCh09G008790	-3.2947	receptor-like protein kinase THESEUS 1
BBT12VS00	CmoCh04G025770	-3.29032	protein GIGANTEA-like
BBT12VS00	CmoCh04G021540	-3.28688	Regulator of Vps4 activity in the MVB pathway protein
BBT12VS00	CmoCh04G003150	-3.28513	zinc finger protein 5-like
BBT12VS00	CmoCh14G011320	-3.28474	UDP-glucose 6-dehydrogenase family protein
BBT12VS00	CmoCh14G001020	-3.26985	protein NRT1/ PTR FAMILY 5.6-like
BBT12VS00	CmoCh01G010080	-3.26873	UPF0496 protein 4
BBT12VS00	CmoCh04G025760	-3.25416	Unknown protein
BBT12VS00	CmoCh01G020270	-3.2541	C2H2-type domain-containing protein
BBT12VS00	CmoCh15G007610	-3.25383	Unknown protein
BBT12VS00	CmoCh08G007530	-3.25115	Unknown protein
BBT12VS00	CmoCh07G000520	-3.25017	Ethylene-responsive nuclear family protein
BBT12VS00	CmoCh12G000070	-3.24342	Poly [ADP-ribose] polymerase
BBT12VS00	CmoCh15G001740	-3.24004	mini-chromosome maintenance complex-binding protein-like
BBT12VS00	CmoCh16G009100	-3.23734	Thiamine thiazole synthase, chloroplastic
BBT12VS00	CmoCh01G001050	-3.23613	Avr9/Cf-9 rapidly elicited protein
BBT12VS00	CmoCh08G004480	-3.23547	Lipase_3 domain-containing protein
BBT12VS00	CmoCh15G009900	-3.22656	Unknown protein
BBT12VS00	CmoCh04G015840	-3.22646	ethylene-responsive transcription factor ERF118-like
BBT12VS00	CmoCh20G007090	-3.22507	protein EXORDIUM-like 5
BBT12VS00	CmoCh15G009940	-3.22343	Unknown protein
BBT12VS00	CmoCh08G006540	-3.20777	Regulator of Vps4 activity in the MVB pathway protein, putative
BBT12VS00	CmoCh01G020370	-3.2009	thaumatin-like protein 1
BBT12VS00	CmoCh04G008000	-3.19854	GDP-mannose 4,6-dehydratase
BBT12VS00	CmoCh01G020360	-3.19123	Pathogenesis-related thaumatin superfamily protein
BBT12VS00	CmoCh09G003100	-3.18125	AP2-like ethylene-responsive transcription factor ANT
BBT12VS00	CmoCh02G000790	-3.17492	protein CONSERVED ONLY IN THE GREEN LINEAGE 160, chloroplastic
BBT12VS00	CmoCh14G018000	-3.16883	Calmodulin
BBT12VS00	CmoCh16G004610	-3.1608	Unknown protein
BBT12VS00	CmoCh11G000610	-3.15527	leucine-rich repeat receptor-like serine/threonine/tyrosine-protein kinase SOBIR1
BBT12VS00	CmoCh07G006650	-3.15002	BTB/POZ and TAZ domain-containing protein 4-like
BBT12VS00	CmoCh05G007040	-3.14773	FGGY carbohydrate kinase domain-containing protein-like
BBT12VS00	CmoCh06G002520	-3.14622	O-fucosyltransferase family protein
BBT12VS00	CmoCh15G011500	-3.14012	Auxin-responsive protein
BBT12VS00	CmoCh05G011100	-3.13917	F-box protein PP2-B15-like
BBT12VS00	CmoCh07G009300	-3.13772	heavy metal-associated isoprenylated plant protein 3-like
BBT12VS00	CmoCh18G003400	-3.13398	CBS domain-containing protein CBSX5-like
BBT12VS00	CmoCh14G016020	-3.13125	Wall-associated receptor kinase
BBT12VS00	CmoCh06G012010	-3.13014	protein NRT1/ PTR FAMILY 7.3-like
BBT12VS00	CmoCh07G005720	-3.12765	mitochondrial uncoupling protein 5-like
BBT12VS00	CmoCh06G001830	-3.12288	50S ribosomal protein L35
BBT12VS00	CmoCh04G003220	-3.11997	Hexosyltransferase
BBT12VS00	CmoCh02G014660	-3.11765	phosphoglycerate mutase-like protein AT74H
BBT12VS00	CmoCh18G005420	-3.11134	Exostosin domain-containing protein
BBT12VS00	CmoCh19G000190	-3.1074	heat stress transcription factor A-6b-like
BBT12VS00	CmoCh16G001900	-3.10447	protein EXORDIUM-like 3
BBT12VS00	CmoCh12G008410	-3.10176	S-adenosyl-l-methionine decarboxylase leader peptide
BBT12VS00	CmoCh18G012110	-3.10163	DUF569 domain-containing protein
BBT12VS00	CmoCh04G022090	-3.09885	nudix hydrolase 17, mitochondrial-like
BBT12VS00	CmoCh09G002810	-3.09396	Unknown protein
BBT12VS00	CmoCh11G001290	-3.09046	transcription factor MYB1R1-like
BBT12VS00	CmoCh02G013650	-3.0902	zinc finger A20 and AN1 domain-containing stress-associated protein 3-like
BBT12VS00	CmoCh04G012070	-3.08207	TPT domain-containing protein
BBT12VS00	CmoCh01G017550	-3.07868	fatty-acid-binding protein 2 isoform X1
BBT12VS00	CmoCh02G005670	-3.07384	cyclin-dependent kinase inhibitor 7-like
BBT12VS00	CmoCh14G008230	-3.05038	Regulator of Vps4 activity in the MVB pathway protein, putative
BBT12VS00	CmoCh08G012120	-3.04559	Unknown protein
BBT12VS00	CmoCh11G002880	-3.04457	LEAF RUST 10 DISEASE-RESISTANCE LOCUS RECEPTOR-LIKE PROTEIN KINASE-like 1.2
BBT12VS00	CmoCh01G007760	-3.04018	Nudix hydrolase-like protein
BBT12VS00	CmoCh04G012080	-3.03743	TPT domain-containing protein
BBT12VS00	CmoCh06G008550	-3.03517	FLZ-type domain-containing protein
BBT12VS00	CmoCh13G010160	-3.03166	Tify domain-containing protein
BBT12VS00	CmoCh08G007520	-3.02901	serine/arginine repetitive matrix protein 1-like
BBT12VS00	CmoCh11G003260	-3.02852	Unknown protein
BBT12VS00	CmoCh11G000420	-3.0282	EF hand calcium-binding family protein
BBT12VS00	CmoCh14G007770	-3.02811	Basic helix-loop-helix transcription factor
BBT12VS00	CmoCh11G004020	-3.02214	Xyloglucan endotransglucosylase/hydrolase
BBT12VS00	CmoCh05G008860	-3.01937	phosphate transporter PHO1 homolog 3-like
BBT12VS00	CmoCh15G012080	-3.00389	monocopper oxidase-like protein SKU5
BBT12VS00	CmoCh11G004390	-3.00017	heptahelical transmembrane protein 2
BBT12VS00	CmoCh15G013850	7.67196	alcohol dehydrogenase-like 4
BBT12VS00	CmoCh04G011660	7.40069	LOB domain-containing protein
BBT12VS00	CmoCh02G004440	7.13052	Peroxidase
BBT12VS00	CmoCh17G007920	7.05839	Protein kinase domain-containing protein
BBT12VS00	CmoCh14G009710	7.00312	GDSL esterase/lipase
BBT12VS00	CmoCh04G006740	6.73849	Unknown protein
BBT12VS00	CmoCh07G006450	6.71723	Uncharacterised conserved protein UCP031279
BBT12VS00	CmoCh05G012800	6.66902	acidic mammalian chitinase-like
BBT12VS00	CmoCh18G001670	6.64798	cytochrome P450 71A1-like
BBT12VS00	CmoCh11G007100	6.56514	Cytokinin dehydrogenase
BBT12VS00	CmoCh16G011510	6.05512	AAI domain-containing protein
BBT12VS00	CmoCh07G013780	5.90702	Glycosyltransferase
BBT12VS00	CmoCh14G011660	5.81371	zinc finger protein CONSTANS-LIKE 2-like
BBT12VS00	CmoCh01G005430	5.80457	Xyloglucan endotransglucosylase/hydrolase
BBT12VS00	CmoCh10G001830	5.5423	protein NUCLEAR FUSION DEFECTIVE 4-like
BBT12VS00	CmoCh13G002640	5.52504	C2H2-type domain-containing protein
BBT12VS00	CmoCh03G007580	5.52412	S-adenosyl-L-methionine-dependent methyltransferases superfamily protein
BBT12VS00	CmoCh11G013960	5.41143	Glycosyltransferase
BBT12VS00	CmoCh08G001650	5.40022	Unknown protein
BBT12VS00	CmoCh20G006090	5.37835	B box-type domain-containing protein
BBT12VS00	CmoCh01G004710	4.976	zinc finger protein CONSTANS-LIKE 2-like
BBT12VS00	CmoCh17G008030	4.93076	2-oxoglutarate (2OG) and Fe(II)-dependent oxygenase superfamily protein
BBT12VS00	CmoCh14G001940	4.93057	transcription initiation factor TFIID subunit 7-like
BBT12VS00	CmoCh13G006750	4.85899	lactosylceramide 4-alpha-galactosyltransferase-like
BBT12VS00	CmoCh01G008880	4.804	Ankyrin repeat-containing protein
BBT12VS00	CmoCh03G009450	4.80152	VQ domain-containing protein
BBT12VS00	CmoCh14G001730	4.77067	protein REVEILLE 8 isoform X2
BBT12VS00	CmoCh19G000690	4.74068	Serine proteinase inhibitor
BBT12VS00	CmoCh19G000680	4.72395	Serine proteinase inhibitor
BBT12VS00	CmoCh12G006800	4.63759	phosphate transporter PHO1 homolog 3-like
BBT12VS00	CmoCh18G004790	4.58282	cationic amino acid transporter 1-like
BBT12VS00	CmoCh13G003330	4.5419	WEB family protein At1g12150-like
BBT12VS00	CmoCh08G010620	4.52539	ethylene-responsive transcription factor 1B-like
BBT12VS00	CmoCh18G004980	4.51276	FAD-binding Berberine family protein
BBT12VS00	CmoCh02G016420	4.4143	beta-amyrin 11-oxidase-like
BBT12VS00	CmoCh04G011940	4.36277	plasma membrane intrinsic protein 1;4
BBT12VS00	CmoCh04G011950	4.34811	plasma membrane intrinsic protein 1;4
BBT12VS00	CmoCh08G001640	4.34039	protein LHY-like isoform X1
BBT12VS00	CmoCh09G007220	4.27932	HTH myb-type domain-containing protein
BBT12VS00	CmoCh03G005870	4.27636	RING/U-box superfamily protein
BBT12VS00	CmoCh03G007280	4.20003	Zinc finger, B-box
BBT12VS00	CmoCh10G006700	4.1733	bark storage protein A
BBT12VS00	CmoCh02G015790	4.1698	tonoplast intrinsic protein 2;2
BBT12VS00	CmoCh11G013610	4.14482	abscisic acid 8'-hydroxylase 4-like
BBT12VS00	CmoCh11G015630	4.14151	nudix hydrolase 13, mitochondrial-like
BBT12VS00	CmoCh07G008470	4.09956	alpha/beta-Hydrolases superfamily protein
BBT12VS00	CmoCh04G011960	4.08053	plasma membrane intrinsic protein 1;4
BBT12VS00	CmoCh04G006730	4.04719	Phytoene synthase
BBT12VS00	CmoCh02G014330	4.01317	Unknown protein
BBT12VS00	CmoCh13G002430	3.96056	Xyloglucan endotransglucosylase/hydrolase
BBT12VS00	CmoCh14G000170	3.94748	Transcription repressor
BBT12VS00	CmoCh02G017850	3.87913	protein LIGHT-DEPENDENT SHORT HYPOCOTYLS 3-like
BBT12VS00	CmoCh17G000580	3.85236	RING-type E3 ubiquitin transferase
BBT12VS00	CmoCh14G013160	3.78914	Leucine-rich repeat protein kinase family protein
BBT12VS00	CmoCh00G001460	3.76299	Transmembrane protein, putative
BBT12VS00	CmoCh02G012510	3.74172	Peroxidase
BBT12VS00	CmoCh05G006180	3.74101	carotenoid cleavage dioxygenase 8 homolog B, chloroplastic-like
BBT12VS00	CmoCh03G012390	3.68217	aquaporin PIP2-2-like
BBT12VS00	CmoCh18G004080	3.672	WRKY protein
BBT12VS00	CmoCh14G016850	3.56637	CASP-like protein
BBT12VS00	CmoCh16G003410	3.54743	Unknown protein
BBT12VS00	CmoCh12G003380	3.53464	Thioredoxin
BBT12VS00	CmoCh01G007710	3.51384	root phototropism protein 2
BBT12VS00	CmoCh04G012410	3.4836	ribulose bisphosphate carboxylase/oxygenase activase, chloroplastic
BBT12VS00	CmoCh02G001100	3.46764	ethylene-responsive transcription factor ERF054-like
BBT12VS00	CmoCh17G003340	3.4448	Protein phosphatase 2C family protein
BBT12VS00	CmoCh14G001930	3.42984	Peroxidase
BBT12VS00	CmoCh08G005430	3.40662	Beta-glucosidase
BBT12VS00	CmoCh04G012420	3.38956	Pentatricopeptide repeat-containing protein, chloroplastic
BBT12VS00	CmoCh02G012500	3.36898	Peroxidase
BBT12VS00	CmoCh17G003000	3.33994	Glutaredoxin
BBT12VS00	CmoCh13G001470	3.30991	phenolic glucoside malonyltransferase 1-like
BBT12VS00	CmoCh02G000180	3.30926	transcription factor JUNGBRUNNEN 1-like
BBT12VS00	CmoCh07G004700	3.29905	heavy metal-associated isoprenylated plant protein 43-like
BBT12VS00	CmoCh14G018210	3.2894	Inhibitor of trypsin and hageman factor-like
BBT12VS00	CmoCh17G005320	3.28815	protein LHY isoform X1
BBT12VS00	CmoCh07G006810	3.2395	ARM-repeat/Tetratricopeptide repeat-like protein
BBT12VS00	CmoCh01G020400	3.2379	Unknown protein
BBT12VS00	CmoCh11G001050	3.21736	aldehyde dehydrogenase 2B4
BBT12VS00	CmoCh14G014960	3.2122	Protein of unknown function (DUF 3339)
BBT12VS00	CmoCh16G004060	3.21135	glutelin type-A 2-like
BBT12VS00	CmoCh14G016420	3.17574	ethylene-responsive transcription factor ERF071-like
BBT12VS00	CmoCh12G007990	3.17023	Plant protein of unknown function (DUF868)
BBT12VS00	CmoCh17G010130	3.16513	Multidrug resistance protein ABC transporter family protein, putative
BBT12VS00	CmoCh04G009350	3.16138	Ty3-gypsy retrotransposon protein
BBT12VS00	CmoCh01G002480	3.15443	Ribosomal protein
BBT12VS00	CmoCh08G006170	3.14904	gibberellin 3-beta-dioxygenase 1-like
BBT12VS00	CmoCh08G009240	3.14733	Protein of unknown function (DUF1442)
BBT12VS00	CmoCh05G012860	3.13305	temperature-induced lipocalin-1-like
BBT12VS00	CmoCh06G011760	3.13285	Pectinesterase
BBT12VS00	CmoCh04G001630	3.12274	Plasma intrinsic protein 1-1
BBT12VS00	CmoCh04G009340	3.10137	Ferric reduction oxidase 7
BBT12VS00	CmoCh04G007940	3.09903	Zinc finger, B-box
BBT12VS00	CmoCh01G014710	3.095	TPR repeat-containing thioredoxin TTL1-like
BBT12VS00	CmoCh04G012470	3.08234	Small polypeptide DEVIL 11
BBT12VS00	CmoCh15G011570	3.0589	ethylene-responsive transcription factor 2-like
BBT12VS00	CmoCh04G010760	3.03945	Encodes a protein whose expression is responsive to nematode infection, putative
BBT12VS00	CmoCh09G003180	3.02439	transcription factor MYB36-like
BBT12VS00	CmoCh16G006600	3.01952	B-box zinc finger family protein
BBT12VS00	CmoCh11G016070	3.00193	WRKY protein
BBT24VS00	CmoCh09G009090	-7.07856	organic cation/carnitine transporter 4-like
BBT24VS00	CmoCh19G009400	-6.49559	S-type anion channel SLAH1-like
BBT24VS00	CmoCh16G013140	-4.80307	Protease inhibitor protein
BBT24VS00	CmoCh20G000660	-4.48819	Lipoxygenase
BBT24VS00	CmoCh04G015120	-4.37274	cucumisin-like
BBT24VS00	CmoCh12G004830	-4.21583	calmodulin-like
BBT24VS00	CmoCh19G005420	-4.14927	pathogenesis-related protein 1-like
BBT24VS00	CmoCh01G019980	-3.76398	Thioredoxin
BBT24VS00	CmoCh04G013270	-3.63267	J domain-containing protein
BBT24VS00	CmoCh01G018680	-3.48165	Isoaspartyl peptidase/L-asparaginase
BBT24VS00	CmoCh01G002810	-3.44173	transcription factor MYB78-like
BBT24VS00	CmoCh05G011110	-3.41503	F-box protein PP2-B15-like
BBT24VS00	CmoCh01G020290	-3.41223	gibberellin-regulated protein 1-like
BBT24VS00	CmoCh16G005530	-3.38237	abscisic acid 8'-hydroxylase 1-like
BBT24VS00	CmoCh12G000070	-3.20403	Poly [ADP-ribose] polymerase
BBT24VS00	CmoCh03G005100	-3.19063	F-box protein
BBT24VS00	CmoCh04G013260	-3.16559	Thioredoxin-like protein YLS8
BBT24VS00	CmoCh19G010300	-3.15813	Protein of unknown function (DUF506)
BBT24VS00	CmoCh07G010760	-3.14039	Unknown protein
BBT24VS00	CmoCh13G010160	-3.10738	Tify domain-containing protein
BBT24VS00	CmoCh10G008090	-3.10644	protein TIFY 10a-like
BBT24VS00	CmoCh15G009830	-3.10377	chaperone protein DnaJ-like isoform X1
BBT24VS00	CmoCh07G004420	-3.07206	cytochrome P450 84A1
BBT24VS00	CmoCh13G001860	8.66787	Laccase
BBT24VS00	CmoCh09G001940	8.28762	Collagen-like repeat preface domain-containing protein
BBT24VS00	CmoCh15G013850	7.66917	alcohol dehydrogenase-like 4
BBT24VS00	CmoCh15G011990	7.08056	protein NRT1/ PTR FAMILY 6.3-like
BBT24VS00	CmoCh07G000570	6.92768	Germin-like protein
BBT24VS00	CmoCh04G025670	6.52159	UPF0496 protein 3-like
BBT24VS00	CmoCh01G002260	6.20458	cytochrome P450 705A22-like
BBT24VS00	CmoCh14G008900	6.08755	Senescence-associated protein, putative
BBT24VS00	CmoCh17G002070	5.79663	protein IQ-DOMAIN 14-like
BBT24VS00	CmoCh17G008030	5.52791	2-oxoglutarate (2OG) and Fe(II)-dependent oxygenase superfamily protein
BBT24VS00	CmoCh11G011330	4.88313	organ-specific protein S2-like isoform X3
BBT24VS00	CmoCh01G005430	4.65185	Xyloglucan endotransglucosylase/hydrolase
BBT24VS00	CmoCh17G007170	4.52038	transcription factor bHLH87-like
BBT24VS00	CmoCh16G011510	4.46327	AAI domain-containing protein
BBT24VS00	CmoCh12G006800	4.43878	phosphate transporter PHO1 homolog 3-like
BBT24VS00	CmoCh17G010130	4.39279	Multidrug resistance protein ABC transporter family protein, putative
BBT24VS00	CmoCh02G016420	4.30153	beta-amyrin 11-oxidase-like
BBT24VS00	CmoCh15G008260	4.29016	Protein arginine N-methyltransferase
BBT24VS00	CmoCh09G007220	3.96539	HTH myb-type domain-containing protein
BBT24VS00	CmoCh13G006750	3.96224	lactosylceramide 4-alpha-galactosyltransferase-like
BBT24VS00	CmoCh13G002430	3.78283	Xyloglucan endotransglucosylase/hydrolase
BBT24VS00	CmoCh05G006180	3.76245	carotenoid cleavage dioxygenase 8 homolog B, chloroplastic-like
BBT24VS00	CmoCh08G012220	3.70247	major allergen Pru ar 1-like
BBT24VS00	CmoCh08G005430	3.56137	Beta-glucosidase
BBT24VS00	CmoCh09G001930	3.55044	Pyridoxal phosphate (PLP)-dependent transferases superfamily protein
BBT24VS00	CmoCh18G004080	3.49707	WRKY protein
BBT24VS00	CmoCh06G013820	3.43001	early light-induced protein 1, chloroplastic-like
BBT24VS00	CmoCh16G004060	3.39917	glutelin type-A 2-like
BBT24VS00	CmoCh17G008810	3.3605	AP2-like ethylene-responsive transcription factor
BBT24VS00	CmoCh04G010600	3.33806	MLP-like protein 329
BBT24VS00	CmoCh03G003080	3.30551	Protein kinase domain-containing protein
BBT24VS00	CmoCh07G006810	3.28033	ARM-repeat/Tetratricopeptide repeat-like protein
BBT24VS00	CmoCh08G005420	3.21848	Unknown protein
BBT24VS00	CmoCh07G004700	3.2163	heavy metal-associated isoprenylated plant protein 43-like
BBT24VS00	CmoCh02G001810	3.15738	Cellulose synthase
BBT24VS00	CmoCh11G015630	3.13193	nudix hydrolase 13, mitochondrial-like
BBT24VS00	CmoCh17G003370	3.11601	major allergen Pru ar 1-like
BBT24VS00	CmoCh13G001470	3.11458	phenolic glucoside malonyltransferase 1-like
BBT24VS00	CmoCh20G006090	3.09103	B box-type domain-containing protein
BBT24VS00	CmoCh11G014650	3.05715	protein PELPK1-like isoform X1
BBT24VS00	CmoCh04G010570	3.04444	MLP-like protein 328
BBT24VS00	CmoCh06G011760	3.03651	Pectinesterase
BBT24VS00	CmoCh14G000170	3.0139	Transcription repressor
BBT24VS00	CmoCh04G006730	3.00129	Phytoene synthase
BBT72VS00	CmoCh17G007890	-8.83647	thionin-like protein 2
BBT72VS00	CmoCh20G011280	-8.17306	Cytochrome P450
BBT72VS00	CmoCh08G009430	-7.93641	Very-long-chain aldehyde decarbonylase GL1-1
BBT72VS00	CmoCh19G008080	-7.67178	Arabidopsis protein of unknown function (DUF241)
BBT72VS00	CmoCh12G003660	-7.64284	auxin-responsive protein SAUR50-like
BBT72VS00	CmoCh03G009540	-7.63199	BTB/POZ domain-containing protein
BBT72VS00	CmoCh11G005180	-7.39688	BSD domain-containing protein
BBT72VS00	CmoCh18G003310	-7.36054	Carboxypeptidase
BBT72VS00	CmoCh15G011500	-7.30217	Auxin-responsive protein
BBT72VS00	CmoCh18G002340	-7.28907	Bidirectional sugar transporter SWEET
BBT72VS00	CmoCh17G012160	-7.27309	Unknown protein
BBT72VS00	CmoCh02G014330	-7.19272	Unknown protein
BBT72VS00	CmoCh14G002530	-7.08359	Cytochrome P450
BBT72VS00	CmoCh04G021150	-7.03658	Eukaryotic aspartyl protease family protein
BBT72VS00	CmoCh15G012460	-7.00317	transcription factor bHLH118-like
BBT72VS00	CmoCh13G001530	-6.91635	zinc finger protein CONSTANS-LIKE 5-like
BBT72VS00	CmoCh20G011290	-6.77904	Unknown protein
BBT72VS00	CmoCh15G009130	-6.75712	C2H2-type domain-containing protein
BBT72VS00	CmoCh10G012640	-6.73337	muscle M-line assembly protein unc-89-like isoform X1
BBT72VS00	CmoCh16G006190	-6.61258	cation/H(+) antiporter 18-like
BBT72VS00	CmoCh04G002040	-6.57136	ribulose bisphosphate carboxylase/oxygenase activase, chloroplastic
BBT72VS00	CmoCh02G015610	-6.55068	Phytocyanin domain-containing protein
BBT72VS00	CmoCh11G019910	-6.5113	Protein root UVB sensitive 1, chloroplastic
BBT72VS00	CmoCh18G002320	-6.50995	Unknown protein
BBT72VS00	CmoCh16G003580	-6.37292	alpha-L-fucosidase 2-like
BBT72VS00	CmoCh02G004810	-6.32206	cytochrome P450 89A2-like
BBT72VS00	CmoCh13G007660	-6.28174	Peroxidase
BBT72VS00	CmoCh05G000280	-6.27188	Plant protein 1589 of unknown function
BBT72VS00	CmoCh02G017500	-6.231	Flavin-containing monooxygenase
BBT72VS00	CmoCh04G030700	-6.21526	thaumatin-like protein
BBT72VS00	CmoCh09G009140	-6.17374	C2H2-type domain-containing protein
BBT72VS00	CmoCh02G000920	-6.16073	tyrosine aminotransferase-like
BBT72VS00	CmoCh04G005620	-6.01573	nigrin b-like isoform X1
BBT72VS00	CmoCh16G005530	-5.99943	abscisic acid 8'-hydroxylase 1-like
BBT72VS00	CmoCh20G011340	-5.91596	Root meristem growth factor 9-like protein
BBT72VS00	CmoCh04G006020	-5.91413	Unknown protein
BBT72VS00	CmoCh13G005020	-5.90162	berberine bridge enzyme-like 18
BBT72VS00	CmoCh04G000770	-5.75954	CRAL-TRIO domain-containing protein
BBT72VS00	CmoCh02G016540	-5.68447	Microspore-specific promoter 2, putative
BBT72VS00	CmoCh10G000260	-5.64444	BHLH transcription factor
BBT72VS00	CmoCh19G007780	-5.58896	O-methyltransferase family protein
BBT72VS00	CmoCh19G007790	-5.58617	O-methyltransferase family protein
BBT72VS00	CmoCh01G004710	-5.56404	zinc finger protein CONSTANS-LIKE 2-like
BBT72VS00	CmoCh19G007520	-5.52485	Glycerate dehydrogenase
BBT72VS00	CmoCh07G000610	-5.50306	alpha/beta-Hydrolases superfamily protein
BBT72VS00	CmoCh05G001560	-5.49974	Gibberellin-regulated protein
BBT72VS00	CmoCh13G011790	-5.45757	protein PHYTOCHROME KINASE SUBSTRATE 1-like
BBT72VS00	CmoCh19G010960	-5.43202	Unknown protein
BBT72VS00	CmoCh02G005240	-5.41823	BTB/POZ domain-containing protein
BBT72VS00	CmoCh07G013470	-5.37877	E3 ubiquitin-protein ligase RNF181-like
BBT72VS00	CmoCh14G017310	-5.37119	Glucose-1-phosphate adenylyltransferase
BBT72VS00	CmoCh04G009000	-5.35867	Unknown protein
BBT72VS00	CmoCh10G005920	-5.35151	protein NRT1/ PTR FAMILY 6.2-like
BBT72VS00	CmoCh13G006020	-5.34373	GDSL esterase/lipase
BBT72VS00	CmoCh15G003850	-5.32884	zinc finger protein CONSTANS-LIKE 7 isoform X1
BBT72VS00	CmoCh03G007150	-5.31768	Transducin/WD40 repeat-like superfamily protein
BBT72VS00	CmoCh19G004760	-5.30343	protein LOL1-like
BBT72VS00	CmoCh07G010120	-5.28363	Plant protein 1589 of unknown function
BBT72VS00	CmoCh16G000590	-5.25482	CCT domain-containing protein
BBT72VS00	CmoCh07G007230	-5.21952	ethylene-responsive transcription factor ERF109-like
BBT72VS00	CmoCh15G003350	-5.17897	WAT1-related protein
BBT72VS00	CmoCh08G011830	-5.167	monothiol glutaredoxin-S2-like
BBT72VS00	CmoCh18G010100	-5.12259	Unknown protein
BBT72VS00	CmoCh03G013530	-5.09646	GDSL esterase/lipase
BBT72VS00	CmoCh05G013450	-5.03241	heat stress transcription factor C-1-like
BBT72VS00	CmoCh14G022240	-5.00533	Late cornified envelope protein 1E
BBT72VS00	CmoCh04G030560	-4.95601	AAI domain-containing protein
BBT72VS00	CmoCh11G001590	-4.90852	transcription factor TCP14-like
BBT72VS00	CmoCh19G010930	-4.86431	Xyloglucan endotransglucosylase/hydrolase
BBT72VS00	CmoCh06G000120	-4.85637	protein STRICTOSIDINE SYNTHASE-LIKE 2-like
BBT72VS00	CmoCh19G010940	-4.85386	Xyloglucan endotransglucosylase/hydrolase
BBT72VS00	CmoCh10G004370	-4.84926	Xyloglucan endotransglucosylase/hydrolase
BBT72VS00	CmoCh01G003770	-4.84905	MLP-like protein 34
BBT72VS00	CmoCh19G010950	-4.81993	Xyloglucan endotransglucosylase/hydrolase
BBT72VS00	CmoCh13G007730	-4.81331	Protein of unknown function, DUF584
BBT72VS00	CmoCh02G005670	-4.80408	cyclin-dependent kinase inhibitor 7-like
BBT72VS00	CmoCh04G011390	-4.77074	protein NRT1/ PTR FAMILY 5.1-like
BBT72VS00	CmoCh11G003920	-4.74194	AAA-ATPase
BBT72VS00	CmoCh11G004000	-4.73293	Xyloglucan endotransglucosylase/hydrolase
BBT72VS00	CmoCh14G006350	-4.72607	protein NRT1/ PTR FAMILY 5.8-like
BBT72VS00	CmoCh11G020560	-4.72404	zinc finger protein CONSTANS-LIKE 5-like
BBT72VS00	CmoCh05G013440	-4.7212	Unknown protein
BBT72VS00	CmoCh02G010900	-4.70334	short-chain dehydrogenase TIC 32, chloroplastic-like
BBT72VS00	CmoCh04G006040	-4.6895	Unknown protein
BBT72VS00	CmoCh18G007210	-4.67389	WD_REPEATS_REGION domain-containing protein
BBT72VS00	CmoCh14G005960	-4.67284	aquaporin NIP2-1-like
BBT72VS00	CmoCh09G012770	-4.66024	ethylene-responsive transcription factor ERF022-like
BBT72VS00	CmoCh04G015780	-4.65644	zinc finger protein CONSTANS-LIKE 16-like
BBT72VS00	CmoCh20G005930	-4.65276	transcription factor MYB30-like
BBT72VS00	CmoCh01G009250	-4.65154	protein NRT1/ PTR FAMILY 4.4-like
BBT72VS00	CmoCh16G001580	-4.6306	dehydration-responsive element-binding protein 1A-like
BBT72VS00	CmoCh02G016470	-4.62212	protein LOL1
BBT72VS00	CmoCh11G005190	-4.61075	Vesicle-associated membrane protein, putative
BBT72VS00	CmoCh17G007330	-4.60907	Histidine phosphotransfer protein
BBT72VS00	CmoCh15G002040	-4.6	Mental retardation GTPase activating protein
BBT72VS00	CmoCh15G006250	-4.58947	glycolipid transfer protein 3-like
BBT72VS00	CmoCh11G017170	-4.55684	SAUR-like auxin-responsive protein family
BBT72VS00	CmoCh06G007910	-4.51342	protein NRT1/ PTR FAMILY 6.3-like
BBT72VS00	CmoCh15G013490	-4.49943	short-chain dehydrogenase TIC 32, chloroplastic-like
BBT72VS00	CmoCh15G010860	-4.49902	protein PSY2-like
BBT72VS00	CmoCh13G005330	-4.47642	protein kinase PINOID-like
BBT72VS00	CmoCh12G003380	-4.47282	Thioredoxin
BBT72VS00	CmoCh19G006440	-4.4711	2-oxoglutarate (2OG) and Fe(II)-dependent oxygenase superfamily protein
BBT72VS00	CmoCh15G012600	-4.46388	Unknown protein
BBT72VS00	CmoCh01G020290	-4.45093	gibberellin-regulated protein 1-like
BBT72VS00	CmoCh11G019010	-4.44827	Protein DETOXIFICATION
BBT72VS00	CmoCh06G007900	-4.4321	Phenylalanine--tRNA ligase beta subunit
BBT72VS00	CmoCh18G011810	-4.42829	protein PHYTOCHROME KINASE SUBSTRATE 1-like
BBT72VS00	CmoCh04G002250	-4.41708	Unknown protein
BBT72VS00	CmoCh06G000130	-4.41614	protein STRICTOSIDINE SYNTHASE-LIKE 2-like
BBT72VS00	CmoCh14G007750	-4.40645	NAD(P)-binding Rossmann-fold superfamily protein
BBT72VS00	CmoCh04G027000	-4.38783	plasma membrane intrinsic protein 2
BBT72VS00	CmoCh02G013770	-4.38696	Unknown protein
BBT72VS00	CmoCh05G000200	-4.38679	polygalacturonase At1g48100-like
BBT72VS00	CmoCh01G004470	-4.37718	Unknown protein
BBT72VS00	CmoCh06G010040	-4.37591	homeobox-leucine zipper protein HAT3-like
BBT72VS00	CmoCh14G019130	-4.36753	S-protein homolog
BBT72VS00	CmoCh06G014690	-4.36165	CASP-like protein
BBT72VS00	CmoCh09G012960	-4.34034	Unknown protein
BBT72VS00	CmoCh07G011050	-4.33385	Vacuolar cation/proton exchanger
BBT72VS00	CmoCh02G008390	-4.32732	protein SODIUM POTASSIUM ROOT DEFECTIVE 3-like
BBT72VS00	CmoCh02G014220	-4.32684	Unknown protein
BBT72VS00	CmoCh01G020270	-4.32071	C2H2-type domain-containing protein
BBT72VS00	CmoCh04G009080	-4.30011	Xyloglucan endotransglucosylase/hydrolase
BBT72VS00	CmoCh20G010020	-4.2992	AB hydrolase-1 domain-containing protein
BBT72VS00	CmoCh02G018120	-4.29413	Unknown protein
BBT72VS00	CmoCh06G017200	-4.29094	GATA transcription factor 12-like
BBT72VS00	CmoCh09G002890	-4.28014	protein SOB FIVE-LIKE 6-like
BBT72VS00	CmoCh02G003650	-4.27916	Fructose-bisphosphate aldolase
BBT72VS00	CmoCh07G007610	-4.27724	HTH-type transcriptional regulator protein ptxE
BBT72VS00	CmoCh10G003830	-4.27235	sodium transporter HKT1
BBT72VS00	CmoCh04G001780	-4.26473	Glycosyltransferase
BBT72VS00	CmoCh04G028930	-4.25247	MYB transcription factor
BBT72VS00	CmoCh20G008510	-4.24719	Unknown protein
BBT72VS00	CmoCh04G011930	-4.24246	glycosyltransferase family 64 protein C4
BBT72VS00	CmoCh04G005610	-4.24217	Nigrin b-like
BBT72VS00	CmoCh01G000080	-4.23822	Unknown protein
BBT72VS00	CmoCh09G009440	-4.23209	Cytochrome P450
BBT72VS00	CmoCh05G011570	-4.22043	Glycoprotein membrane precursor GPI-anchored
BBT72VS00	CmoCh14G001000	-4.21822	TIP41-like protein
BBT72VS00	CmoCh06G009490	-4.18476	Auxin-responsive protein
BBT72VS00	CmoCh11G006690	-4.18473	Oxidative stress 3
BBT72VS00	CmoCh02G010610	-4.1823	dehydration-responsive element-binding protein 1E-like
BBT72VS00	CmoCh04G001840	-4.18133	Encodes a protein involved in salt tolerance, names SIS (Salt Induced Serine rich).
BBT72VS00	CmoCh02G003900	-4.17511	phosphatidylinositol/phosphatidylcholine transfer protein SFH3-like
BBT72VS00	CmoCh09G012820	-4.17385	ethylene-responsive transcription factor ERF021-like
BBT72VS00	CmoCh12G004180	-4.15981	zinc-finger homeodomain protein 2-like
BBT72VS00	CmoCh06G008550	-4.15662	FLZ-type domain-containing protein
BBT72VS00	CmoCh09G007180	-4.15334	transcription factor PIF4-like
BBT72VS00	CmoCh15G012980	-4.14979	Plasma membrane intrinsic protein 1
BBT72VS00	CmoCh16G009100	-4.14714	Thiamine thiazole synthase, chloroplastic
BBT72VS00	CmoCh17G001860	-4.12656	Auxin-responsive protein
BBT72VS00	CmoCh08G003550	-4.11512	Adenylate isopentenyltransferase 3
BBT72VS00	CmoCh11G001690	-4.10677	cyclic dof factor 3-like
BBT72VS00	CmoCh07G000480	-4.1029	WRKY domain-containing protein
BBT72VS00	CmoCh04G001880	-4.09012	Mitochondrial substrate carrier family protein
BBT72VS00	CmoCh09G007950	-4.07992	ethylene-responsive transcription factor ERF014-like
BBT72VS00	CmoCh13G009760	-4.07614	Unknown protein
BBT72VS00	CmoCh13G006600	-4.06508	Protein of unknown function (DUF506)
BBT72VS00	CmoCh05G004270	-4.06003	thermospermine synthase ACAULIS5
BBT72VS00	CmoCh05G005300	-4.05159	protein EXORDIUM-like
BBT72VS00	CmoCh15G012610	-4.05141	dehydration-responsive element-binding protein 1A-like
BBT72VS00	CmoCh04G018810	-4.05114	cytochrome P450 71B34-like
BBT72VS00	CmoCh01G007710	-4.04867	root phototropism protein 2
BBT72VS00	CmoCh08G006820	-4.04492	aquaporin TIP2-1-like
BBT72VS00	CmoCh20G010610	-4.04362	ABC transporter-like
BBT72VS00	CmoCh16G001500	-4.02607	S-adenosyl-L-methionine-dependent methyltransferases superfamily protein
BBT72VS00	CmoCh10G006520	-4.01094	heat stress transcription factor C-1-like
BBT72VS00	CmoCh06G001000	-4.00415	Growth-regulating factor
BBT72VS00	CmoCh02G000970	-3.99353	transcription factor bHLH162-like
BBT72VS00	CmoCh04G004560	-3.99105	Protein of unknown function (DUF1005)
BBT72VS00	CmoCh05G001280	-3.98925	Growth-regulating factor
BBT72VS00	CmoCh17G012600	-3.9808	Unknown protein
BBT72VS00	CmoCh01G014680	-3.98049	FLZ-type domain-containing protein
BBT72VS00	CmoCh06G000240	-3.97141	amino acid transporter AVT1A-like isoform X1
BBT72VS00	CmoCh08G012490	-3.9709	Unknown protein
BBT72VS00	CmoCh12G010090	-3.96206	CASP-like protein
BBT72VS00	CmoCh10G001110	-3.9585	Golgin subfamily A member 6-like protein 2
BBT72VS00	CmoCh07G013480	-3.95798	Unknown protein
BBT72VS00	CmoCh07G005310	-3.95612	FLZ-type domain-containing protein
BBT72VS00	CmoCh18G013450	-3.95431	Retrovirus-related Pol polyprotein from transposon RE1
BBT72VS00	CmoCh13G007280	-3.95356	transcription factor ILR3-like
BBT72VS00	CmoCh17G012590	-3.94614	NAC domain-containing protein
BBT72VS00	CmoCh17G002590	-3.93584	adenylate isopentenyltransferase 5, chloroplastic-like
BBT72VS00	CmoCh18G010280	-3.92395	Unknown protein
BBT72VS00	CmoCh13G007340	-3.91063	cysteine-rich receptor-like protein kinase 6
BBT72VS00	CmoCh06G014310	-3.90827	Unknown protein
BBT72VS00	CmoCh02G007570	-3.90643	NAD(P)H dehydrogenase (quinone)
BBT72VS00	CmoCh05G000330	-3.89553	F-box/kelch-repeat protein At1g23390-like
BBT72VS00	CmoCh11G002740	-3.88932	Unknown protein
BBT72VS00	CmoCh17G008070	-3.88846	Phototropic-responsive NPH3 family protein
BBT72VS00	CmoCh18G003180	-3.88591	transcription factor MYB102-like
BBT72VS00	CmoCh15G006930	-3.87941	photosystem II 22 kDa protein, chloroplastic-like
BBT72VS00	CmoCh07G009710	-3.8631	aquaporin PIP2-2-like
BBT72VS00	CmoCh04G024050	-3.86214	Unknown protein
BBT72VS00	CmoCh02G014210	-3.85602	Unknown protein
BBT72VS00	CmoCh13G009820	-3.85458	tonoplast intrinsic protein 2
BBT72VS00	CmoCh18G001790	-3.85141	BTB/POZ and TAZ domain-containing protein 1-like
BBT72VS00	CmoCh11G017870	-3.83552	protein EXORDIUM-like 5
BBT72VS00	CmoCh06G000550	-3.83207	protein PHYTOCHROME KINASE SUBSTRATE 4-like
BBT72VS00	CmoCh10G001170	-3.83186	Leucine-rich receptor-like protein kinase family protein
BBT72VS00	CmoCh20G002050	-3.81837	Phosphoglycerate/bisphosphoglycerate mutase family protein isoform 1
BBT72VS00	CmoCh16G001390	-3.81751	Unknown protein
BBT72VS00	CmoCh03G003620	-3.81576	Vacuolar cation/proton exchanger
BBT72VS00	CmoCh19G004210	-3.80664	myosin-8 isoform X2
BBT72VS00	CmoCh07G001300	-3.79907	Chlorophyll a-b binding protein, chloroplastic
BBT72VS00	CmoCh04G004630	-3.7989	F-box protein SKIP22-like
BBT72VS00	CmoCh14G008870	-3.7856	aspartic proteinase PCS1-like
BBT72VS00	CmoCh19G009750	-3.78448	Xyloglucan endotransglucosylase/hydrolase
BBT72VS00	CmoCh14G008310	-3.75766	agamous-like MADS-box protein AGL6
BBT72VS00	CmoCh08G005180	-3.75637	Cellulose synthase
BBT72VS00	CmoCh18G010270	-3.75332	Ribulose bisphosphate carboxylase small subunit
BBT72VS00	CmoCh04G000950	-3.74515	Unknown protein
BBT72VS00	CmoCh11G000260	-3.7408	squamosa promoter-binding-like protein 13A
BBT72VS00	CmoCh11G004400	-3.73849	protein TSS
BBT72VS00	CmoCh12G008370	-3.73846	UDP-glucuronate 4-epimerase 1-like
BBT72VS00	CmoCh01G019980	-3.73676	Thioredoxin
BBT72VS00	CmoCh11G008700	-3.73254	Unknown protein
BBT72VS00	CmoCh17G011930	-3.72811	Auxin-responsive protein
BBT72VS00	CmoCh08G012100	-3.72798	Unknown protein
BBT72VS00	CmoCh16G000770	-3.72797	cation/H(+) antiporter 3-like
BBT72VS00	CmoCh11G008150	-3.72518	Late embryogenesis abundant (LEA) hydroxyproline-rich glycoprotein family
BBT72VS00	CmoCh04G001640	-3.72488	plasma membrane intrinsic protein 1;4
BBT72VS00	CmoCh02G006210	-3.72164	RING-type E3 ubiquitin transferase
BBT72VS00	CmoCh04G026910	-3.71437	protein ENHANCED DISEASE RESISTANCE 2-like
BBT72VS00	CmoCh05G006100	-3.71095	Protein of unknown function (DUF1677)
BBT72VS00	CmoCh09G008790	-3.70852	receptor-like protein kinase THESEUS 1
BBT72VS00	CmoCh03G003760	-3.70772	shaggy-like protein kinase 41
BBT72VS00	CmoCh01G012340	-3.70674	DUF1223 domain-containing protein
BBT72VS00	CmoCh14G008580	-3.69821	Polyketide cyclase/dehydrase and lipid transport superfamily protein
BBT72VS00	CmoCh14G012420	-3.69105	Lipase, GDSL
BBT72VS00	CmoCh19G009760	-3.68625	Actin cytoskeleton-regulatory complex protein
BBT72VS00	CmoCh03G004100	-3.68349	protein NRT1/ PTR FAMILY 5.6-like
BBT72VS00	CmoCh06G005470	-3.68347	fasciclin-like arabinogalactan protein 17
BBT72VS00	CmoCh18G000010	-3.6727	Protein of unknown function (DUF1118)
BBT72VS00	CmoCh12G000270	-3.66688	Plant protein of unknown function (DUF868)
BBT72VS00	CmoCh02G008530	-3.66184	phototropin-1-like
BBT72VS00	CmoCh14G003790	-3.66164	Unknown protein
BBT72VS00	CmoCh20G009310	-3.66111	binding partner of ACD11 1-like
BBT72VS00	CmoCh16G013100	-3.65647	Protease inhibitor protein
BBT72VS00	CmoCh11G005970	-3.65584	Heavy metal-associated domain containing protein
BBT72VS00	CmoCh03G005510	-3.65236	cytochrome P450 77A1
BBT72VS00	CmoCh11G001610	-3.64839	myb-related protein 306-like
BBT72VS00	CmoCh18G011640	-3.64249	cyclic dof factor 1-like
BBT72VS00	CmoCh05G012390	-3.6408	proteoglycan 4-like isoform X1
BBT72VS00	CmoCh01G017500	-3.63778	Unknown protein
BBT72VS00	CmoCh01G001370	-3.62883	acyl-protein thioesterase 2-like
BBT72VS00	CmoCh01G000430	-3.62465	AP2-like ethylene-responsive transcription factor AIL1
BBT72VS00	CmoCh11G019260	-3.62331	SPARK domain-containing protein
BBT72VS00	CmoCh10G002290	-3.6227	dCTP pyrophosphatase 1
BBT72VS00	CmoCh14G001430	-3.62225	metallothionein-like protein type 2
BBT72VS00	CmoCh04G029240	-3.62001	Cyclic nucleotide gated channel
BBT72VS00	CmoCh02G009310	-3.61599	Glutaredoxin domain-containing protein
BBT72VS00	CmoCh16G000760	-3.61585	arabinogalactan peptide 22-like
BBT72VS00	CmoCh06G002700	-3.6154	protein NRT1/ PTR FAMILY 5.6-like
BBT72VS00	CmoCh14G010440	-3.61453	O-fucosyltransferase family protein
BBT72VS00	CmoCh20G009630	-3.60567	Unknown protein
BBT72VS00	CmoCh13G001580	-3.60457	MYB domain class transcription factor
BBT72VS00	CmoCh07G010230	-3.60402	cation/H(+) antiporter 20-like
BBT72VS00	CmoCh18G007700	-3.59765	Unknown protein
BBT72VS00	CmoCh18G001780	-3.5951	BTB/POZ and TAZ domain-containing protein 1-like
BBT72VS00	CmoCh12G003680	-3.58869	protein IQ-DOMAIN 32-like
BBT72VS00	CmoCh05G006450	-3.58291	protein kinase C-like zinc finger protein
BBT72VS00	CmoCh01G001360	-3.57718	Unknown protein
BBT72VS00	CmoCh03G013350	-3.5769	Unknown protein
BBT72VS00	CmoCh01G019860	-3.57257	jasmonate O-methyltransferase-like
BBT72VS00	CmoCh02G010360	-3.56885	Gibberellin 20-oxidase
BBT72VS00	CmoCh17G002100	-3.56545	type IV inositol polyphosphate 5-phosphatase 7-like
BBT72VS00	CmoCh18G004440	-3.55978	purine permease 10
BBT72VS00	CmoCh03G003680	-3.54715	auxin transporter-like protein 4
BBT72VS00	CmoCh15G009460	-3.54462	transcription factor HBP-1b(C38)-like isoform X1
BBT72VS00	CmoCh11G011170	-3.54359	transcription factor bHLH63-like
BBT72VS00	CmoCh19G008490	-3.54091	Glucose-1-phosphate adenylyltransferase
BBT72VS00	CmoCh17G013530	-3.54046	light-regulated protein-like
BBT72VS00	CmoCh11G008710	-3.53931	zinc finger CCCH domain-containing protein 55
BBT72VS00	CmoCh20G010150	-3.53727	Unknown protein
BBT72VS00	CmoCh18G012680	-3.5348	remorin
BBT72VS00	CmoCh12G010830	-3.53363	protein ALWAYS EARLY 2-like isoform X1
BBT72VS00	CmoCh10G007060	-3.53259	(1->3)-beta-glucan endohydrolase
BBT72VS00	CmoCh10G004500	-3.52835	PTI1-like tyrosine-protein kinase At3g15890
BBT72VS00	CmoCh18G007710	-3.52798	octicosapeptide/Phox/Bem1p (PB1) domain-containing protein
BBT72VS00	CmoCh01G001950	-3.52754	ABC transporter C family member 13 isoform X1
BBT72VS00	CmoCh19G004540	-3.52722	two-component response regulator-like APRR2
BBT72VS00	CmoCh10G004490	-3.52406	CONSTANS-like zinc finger protein
BBT72VS00	CmoCh03G007320	-3.52196	S-adenosyl-L-methionine-dependent methyltransferases superfamily protein
BBT72VS00	CmoCh04G027880	-3.5134	Membrane protein
BBT72VS00	CmoCh04G011710	-3.51339	S-adenosyl-L-methionine-dependent methyltransferases superfamily protein
BBT72VS00	CmoCh11G006340	-3.51221	Auxin-responsive protein
BBT72VS00	CmoCh02G000360	-3.51134	Chlorophyll a-b binding protein, chloroplastic
BBT72VS00	CmoCh09G001850	-3.50854	cytochrome P450 CYP82D47-like
BBT72VS00	CmoCh08G003060	-3.49977	phospholipase A1-Igamma1, chloroplastic
BBT72VS00	CmoCh06G004890	-3.49782	beta-fructofuranosidase, insoluble isoenzyme 1-like
BBT72VS00	CmoCh04G018130	-3.49699	2-methylene-furan-3-one reductase
BBT72VS00	CmoCh14G004810	-3.48926	remorin 4.1-like
BBT72VS00	CmoCh14G020510	-3.48898	Growth-regulating factor
BBT72VS00	CmoCh18G009970	-3.48824	Zinc finger, B-box
BBT72VS00	CmoCh14G009770	-3.4828	WD repeat-containing protein 6
BBT72VS00	CmoCh19G009860	-3.48213	SPARK domain-containing protein
BBT72VS00	CmoCh09G009430	-3.48043	Plant/F10M23-360 protein
BBT72VS00	CmoCh15G003340	-3.47776	Leucine-rich repeat protein kinase family protein
BBT72VS00	CmoCh12G000870	-3.47663	MADS-box transcription factor
BBT72VS00	CmoCh14G022230	-3.47592	squamosa promoter-binding-like protein 7
BBT72VS00	CmoCh10G006750	-3.47018	Unknown protein
BBT72VS00	CmoCh12G002900	-3.46923	Histone acetyltransferase
BBT72VS00	CmoCh05G000340	-3.46487	Unknown protein
BBT72VS00	CmoCh11G001720	-3.46293	Chlorophyll a-b binding protein, chloroplastic
BBT72VS00	CmoCh06G015050	-3.45997	Serine-rich adhesin for platelets
BBT72VS00	CmoCh12G003100	-3.45886	PPPDE domain-containing protein
BBT72VS00	CmoCh20G010070	-3.45509	Plant protein of unknown function (DUF863)
BBT72VS00	CmoCh07G000770	-3.45209	Unknown protein
BBT72VS00	CmoCh11G019280	-3.45162	Transcription factor, Myb superfamily
BBT72VS00	CmoCh13G011920	-3.44781	cyclic dof factor 3-like
BBT72VS00	CmoCh04G023730	-3.44694	Psy2
BBT72VS00	CmoCh14G006410	-3.44663	gibberellin-regulated protein 14
BBT72VS00	CmoCh14G005040	-3.4462	cytochrome P450 94A1-like
BBT72VS00	CmoCh07G004840	-3.44539	Unknown protein
BBT72VS00	CmoCh07G010930	-3.44431	Chlorophyll a-b binding protein, chloroplastic
BBT72VS00	CmoCh01G007060	-3.44281	Protein-serine/threonine phosphatase
BBT72VS00	CmoCh10G006660	-3.44157	Ribonuclease P
BBT72VS00	CmoCh07G006690	-3.44034	LOB domain-containing protein
BBT72VS00	CmoCh03G014520	-3.43954	Unknown protein
BBT72VS00	CmoCh04G005340	-3.43938	ethylene-responsive transcription factor ERF109-like
BBT72VS00	CmoCh03G010280	-3.43679	Unknown protein
BBT72VS00	CmoCh09G011740	-3.43537	abscisic stress-ripening protein 2-like
BBT72VS00	CmoCh11G012510	-3.43418	Unknown protein
BBT72VS00	CmoCh11G019720	-3.4318	Protein of unknown function (DUF688)
BBT72VS00	CmoCh06G001570	-3.43002	protein PIN-LIKES 7-like
BBT72VS00	CmoCh01G008290	-3.42992	cyclic dof factor 1-like
BBT72VS00	CmoCh16G001380	-3.42983	3-hexulose-6-phosphate isomerase
BBT72VS00	CmoCh02G003300	-3.42874	pentatricopeptide repeat-containing protein MRL1, chloroplastic
BBT72VS00	CmoCh18G001720	-3.42852	cytochrome P450 71A1-like
BBT72VS00	CmoCh09G004920	-3.42628	CHY-type/CTCHY-type/RING-type Zinc finger protein
BBT72VS00	CmoCh11G011820	-3.42019	dormancy-associated protein homolog 3-like isoform X1
BBT72VS00	CmoCh02G009540	-3.4155	alcohol dehydrogenase-like 4
BBT72VS00	CmoCh11G003440	-3.41332	extracellular ribonuclease isoform X3
BBT72VS00	CmoCh13G008560	-3.40966	Bidirectional sugar transporter SWEET
BBT72VS00	CmoCh20G010940	-3.40627	terpene synthase 10-like
BBT72VS00	CmoCh02G002450	-3.40099	protein NUCLEAR FUSION DEFECTIVE 4-like
BBT72VS00	CmoCh18G000510	-3.39422	Peptidylprolyl isomerase
BBT72VS00	CmoCh06G006860	-3.38999	Beta-amylase
BBT72VS00	CmoCh11G002790	-3.38542	Unknown protein
BBT72VS00	CmoCh16G011920	-3.38434	Eukaryotic aspartyl protease family protein
BBT72VS00	CmoCh06G014220	-3.38291	BRI1 kinase inhibitor 1
BBT72VS00	CmoCh20G011640	-3.37539	protein RALF-like 34
BBT72VS00	CmoCh11G017180	-3.37495	auxin-responsive protein SAUR21-like
BBT72VS00	CmoCh20G000260	-3.37421	Chlororespiratory reduction 42
BBT72VS00	CmoCh20G000270	-3.37421	Yippee domain-containing protein
BBT72VS00	CmoCh02G016560	-3.37388	abscisic acid receptor PYR1-like
BBT72VS00	CmoCh12G010270	-3.37011	acyl-CoA-binding domain-containing protein 4
BBT72VS00	CmoCh05G013430	-3.36312	Peroxiredoxins prx-1 prx-2 prx-3
BBT72VS00	CmoCh12G011520	-3.36142	protein WVD2-like 1
BBT72VS00	CmoCh08G012040	-3.35978	3-hydroxyacyl-CoA dehydrogenase
BBT72VS00	CmoCh18G001750	-3.35603	cytochrome P450 71A1-like
BBT72VS00	CmoCh11G018130	-3.35578	long chain acyl-CoA synthetase 8
BBT72VS00	CmoCh07G003730	-3.3503	plant intracellular Ras-group-related LRR protein 4-like
BBT72VS00	CmoCh04G028540	-3.34826	xyloglucan glycosyltransferase 4-like
BBT72VS00	CmoCh08G003320	-3.34818	protein MARD1-like
BBT72VS00	CmoCh19G009850	-3.3463	Cytochrome b6-f complex iron-sulfur subunit
BBT72VS00	CmoCh10G007630	-3.34375	DDE Tnp4 domain-containing protein
BBT72VS00	CmoCh06G014230	-3.34031	Unknown protein
BBT72VS00	CmoCh07G000620	-3.34005	Unknown protein
BBT72VS00	CmoCh03G009900	-3.3368	Lipase_3 domain-containing protein
BBT72VS00	CmoCh04G021570	-3.33403	transcription factor HBP-1b(C38)-like isoform X1
BBT72VS00	CmoCh14G010000	-3.32538	Hydroxymethylbilane synthase
BBT72VS00	CmoCh11G008040	-3.32107	Tyrosine-specific transport protein
BBT72VS00	CmoCh11G002780	-3.31726	synaptotagmin-5-like isoform X1
BBT72VS00	CmoCh14G008430	-3.31125	transcription factor MYB20-like
BBT72VS00	CmoCh16G009840	-3.30459	zinc finger CCCH domain-containing protein 18-like
BBT72VS00	CmoCh14G007420	-3.30267	protein LAZY 1-like
BBT72VS00	CmoCh06G015600	-3.30221	Phytochrome
BBT72VS00	CmoCh18G009980	-3.29815	Unknown protein
BBT72VS00	CmoCh15G000040	-3.29811	50S ribosomal protein L18-like
BBT72VS00	CmoCh18G013010	-3.29663	protein REVEILLE 6-like
BBT72VS00	CmoCh11G004680	-3.29147	Unknown protein
BBT72VS00	CmoCh00G000140	-3.28756	disease resistance protein RGA2-like
BBT72VS00	CmoCh01G002750	-3.28605	WD repeat-containing protein 6
BBT72VS00	CmoCh11G013450	-3.28105	type IV secretion system protein virB10-like
BBT72VS00	CmoCh07G000460	-3.27838	protein LIGHT-DEPENDENT SHORT HYPOCOTYLS 4-like
BBT72VS00	CmoCh17G002480	-3.27289	Glucose-1-phosphate adenylyltransferase
BBT72VS00	CmoCh20G006530	-3.27246	O-methyltransferase family protein
BBT72VS00	CmoCh18G010980	-3.27141	transcription factor bHLH49-like
BBT72VS00	CmoCh20G010140	-3.27003	filament-like plant protein 7
BBT72VS00	CmoCh12G004460	-3.26621	Unknown protein
BBT72VS00	CmoCh11G017640	-3.26612	signal recognition particle 43 kDa protein, chloroplastic-like
BBT72VS00	CmoCh01G004200	-3.2639	Mental retardation GTPase activating protein
BBT72VS00	CmoCh19G002330	-3.26282	homeobox-leucine zipper protein HDG5
BBT72VS00	CmoCh19G009970	-3.26228	NADH:ubiquinone reductase (non-electrogenic)
BBT72VS00	CmoCh04G012170	-3.26177	17.8 kDa class I heat shock protein-like
BBT72VS00	CmoCh11G017080	-3.25502	RNase H domain-containing protein
BBT72VS00	CmoCh03G013180	-3.25382	50S ribosomal protein L34, chloroplastic
BBT72VS00	CmoCh12G003310	-3.25004	protein GLUTAMINE DUMPER 4-like
BBT72VS00	CmoCh15G013610	-3.24859	Auxin response factor
BBT72VS00	CmoCh17G002110	-3.24759	Homocysteine S-methyltransferase
BBT72VS00	CmoCh10G006670	-3.24645	Unknown protein
BBT72VS00	CmoCh04G004310	-3.24553	dicarboxylate transporter 2.1, chloroplastic-like
BBT72VS00	CmoCh07G004830	-3.24512	zinc-finger homeodomain protein 6-like
BBT72VS00	CmoCh04G016370	-3.24491	protein PHYLLO, chloroplastic isoform X2
BBT72VS00	CmoCh09G006100	-3.22743	Auxin-responsive protein
BBT72VS00	CmoCh15G012640	-3.22489	Protein DETOXIFICATION
BBT72VS00	CmoCh16G001470	-3.21635	RHOMBOID-like protein
BBT72VS00	CmoCh17G013750	-3.20522	protein LAZY 1-like
BBT72VS00	CmoCh04G012020	-3.20356	sedoheptulose-1,7-bisphosphatase, chloroplastic
BBT72VS00	CmoCh01G000920	-3.20288	Profilin
BBT72VS00	CmoCh05G008690	-3.2011	photosynthetic NDH subunit of lumenal location 2, chloroplastic
BBT72VS00	CmoCh07G007590	-3.1995	oxygen-evolving enhancer protein 1, chloroplastic-like
BBT72VS00	CmoCh18G008090	-3.19881	Xyloglucan endotransglucosylase/hydrolase
BBT72VS00	CmoCh02G015590	-3.19763	1-aminocyclopropane-1-carboxylate synthase 1
BBT72VS00	CmoCh05G003810	-3.19367	LOW QUALITY PROTEIN: uncharacterized protein LOC103488318
BBT72VS00	CmoCh11G007230	-3.19212	DDE Tnp4 domain-containing protein
BBT72VS00	CmoCh04G008590	-3.19114	FLZ-type domain-containing protein
BBT72VS00	CmoCh20G004870	-3.18919	phototropin-1-like
BBT72VS00	CmoCh03G007310	-3.18666	Unknown protein
BBT72VS00	CmoCh04G015910	-3.18388	AP2/ERF and B3 domain-containing transcription factor RAV1-like
BBT72VS00	CmoCh17G005210	-3.18154	protein TSS-like
BBT72VS00	CmoCh01G018300	-3.1665	DUF4378 domain-containing protein
BBT72VS00	CmoCh03G010920	-3.16441	WAT1-related protein
BBT72VS00	CmoCh10G002030	-3.16361	Transcription factor, TCP
BBT72VS00	CmoCh14G007770	-3.16302	Basic helix-loop-helix transcription factor
BBT72VS00	CmoCh16G004290	-3.16252	Unknown protein
BBT72VS00	CmoCh08G012110	-3.15963	Protein DETOXIFICATION
BBT72VS00	CmoCh03G012610	-3.15917	Pentatricopeptide repeat-containing protein
BBT72VS00	CmoCh09G001500	-3.14869	protein RADIALIS-like 3
BBT72VS00	CmoCh17G013550	-3.14594	protein LAX PANICLE 2-like
BBT72VS00	CmoCh12G003570	-3.1422	Tubulin beta chain
BBT72VS00	CmoCh16G002590	-3.14069	root phototropism protein 3-like
BBT72VS00	CmoCh13G005600	-3.13754	protein TIFY 5A-like
BBT72VS00	CmoCh20G005190	-3.13587	Aquaporin-like protein
BBT72VS00	CmoCh01G014410	-3.13413	ethylene-responsive transcription factor ERF014-like
BBT72VS00	CmoCh10G004350	-3.13169	Xyloglucan endotransglucosylase/hydrolase
BBT72VS00	CmoCh07G000580	-3.12977	Kinase, putative
BBT72VS00	CmoCh18G003100	-3.12956	oxygen-evolving enhancer protein 3-2, chloroplastic-like
BBT72VS00	CmoCh16G003180	-3.1295	Protein of unknown function (DUF1005)
BBT72VS00	CmoCh16G000510	-3.12827	Unknown protein
BBT72VS00	CmoCh10G012100	-3.12464	Bidirectional sugar transporter SWEET
BBT72VS00	CmoCh02G014390	-3.12048	Unknown protein
BBT72VS00	CmoCh11G009050	-3.11891	heat stress transcription factor B-4b-like
BBT72VS00	CmoCh14G012650	-3.1162	Growth-regulating factor
BBT72VS00	CmoCh01G013100	-3.11097	Plant protein of unknown function (DUF641)
BBT72VS00	CmoCh10G010170	-3.10592	metal tolerance protein 4
BBT72VS00	CmoCh18G004590	-3.1037	Inositol transporter like
BBT72VS00	CmoCh07G008310	-3.0981	photosystem I reaction center subunit N, chloroplastic
BBT72VS00	CmoCh07G000760	-3.095	Early-responsive to dehydration stress protein (ERD4)
BBT72VS00	CmoCh07G000520	-3.09494	Ethylene-responsive nuclear family protein
BBT72VS00	CmoCh04G021480	-3.09362	zinc finger protein CONSTANS-LIKE 16-like
BBT72VS00	CmoCh11G006960	-3.08922	tetraspanin-2-like
BBT72VS00	CmoCh17G008430	-3.08792	protein TSS
BBT72VS00	CmoCh04G012420	-3.08695	Pentatricopeptide repeat-containing protein, chloroplastic
BBT72VS00	CmoCh14G001270	-3.08657	Heat shock protein DnaJ, cysteine-rich domain containing protein
BBT72VS00	CmoCh02G010790	-3.08398	remorin-like
BBT72VS00	CmoCh15G001500	-3.08086	Clp R domain-containing protein
BBT72VS00	CmoCh08G005610	-3.07981	Protein of Unknown Function (DUF239)
BBT72VS00	CmoCh04G002560	-3.07768	receptor-like protein kinase HERK 1
BBT72VS00	CmoCh05G009490	-3.07613	Terpene cyclase/mutase family member
BBT72VS00	CmoCh06G007280	-3.06958	ethylene-responsive transcription factor ERF026-like
BBT72VS00	CmoCh20G005810	-3.06936	Unknown protein
BBT72VS00	CmoCh01G006240	-3.06931	Unknown protein
BBT72VS00	CmoCh20G000950	-3.06785	photosystem II 5 kDa protein, chloroplastic
BBT72VS00	CmoCh04G001040	-3.06233	Expansin
BBT72VS00	CmoCh16G005560	-3.06192	Glutamine-rich protein 2
BBT72VS00	CmoCh15G008480	-3.05897	OMPdecase
BBT72VS00	CmoCh17G002970	-3.05215	Beta-amylase
BBT72VS00	CmoCh11G009210	-3.05133	Unknown protein
BBT72VS00	CmoCh06G017270	-3.0513	Cathepsin B-like
BBT72VS00	CmoCh07G005220	-3.05037	heavy metal-associated isoprenylated plant protein 23-like
BBT72VS00	CmoCh16G002600	-3.04844	root phototropism protein 3-like
BBT72VS00	CmoCh03G008080	-3.04712	protein ACTIVITY OF BC1 COMPLEX KINASE 8, chloroplastic-like
BBT72VS00	CmoCh11G007650	-3.04665	ethylene-responsive transcription factor ERF017-like
BBT72VS00	CmoCh15G008920	-3.0461	Pectinesterase
BBT72VS00	CmoCh04G023740	-3.04258	Sucrose synthase
BBT72VS00	CmoCh04G027050	-3.04238	Chlorophyll a-b binding protein, chloroplastic
BBT72VS00	CmoCh14G016520	-3.03997	Serine-rich adhesin for platelets
BBT72VS00	CmoCh06G002390	-3.03696	transcription factor DIVARICATA-like
BBT72VS00	CmoCh01G008210	-3.0369	protein PHYTOCHROME KINASE SUBSTRATE 1-like
BBT72VS00	CmoCh10G002510	-3.03682	zinc finger protein CONSTANS-LIKE 6
BBT72VS00	CmoCh11G019270	-3.03583	Unknown protein
BBT72VS00	CmoCh04G016530	-3.03088	Unknown protein
BBT72VS00	CmoCh08G012140	-3.02963	multiple organellar RNA editing factor 3, mitochondrial
BBT72VS00	CmoCh01G006250	-3.02893	Unknown protein
BBT72VS00	CmoCh20G004730	-3.02676	3-ketoacyl-CoA synthase
BBT72VS00	CmoCh10G001550	-3.02455	Unknown protein
BBT72VS00	CmoCh19G008550	-3.01957	Unknown protein
BBT72VS00	CmoCh20G005800	-3.01842	Protein of unknown function (DUF789)
BBT72VS00	CmoCh20G005290	-3.01693	cyclic nucleotide-gated channel 15
BBT72VS00	CmoCh18G000670	-3.01526	C2H2-like zinc finger protein
BBT72VS00	CmoCh16G002580	-3.0143	Aspartyl/glutamyl-tRNA(Asn/Gln) amidotransferasesubunit B
BBT72VS00	CmoCh01G006860	-3.01225	Phosphomethylpyrimidine synthase
BBT72VS00	CmoCh00G000330	-3.00918	(1->3)-beta-glucan endohydrolase
BBT72VS00	CmoCh04G004250	-3.00878	root phototropism protein 3
BBT72VS00	CmoCh09G006000	-3.00808	Receptor-like protein kinase HSL1
BBT72VS00	CmoCh15G006070	-3.00755	Vacuolar iron transporter
BBT72VS00	CmoCh16G000730	-3.00512	RNA polymerase sigma factor sigE
BBT72VS00	CmoCh17G003240	-3.00039	3-hydroxyacyl-CoA dehydrogenase
BBT72VS00	CmoCh02G017080	-3.00027	RING-type E3 ubiquitin transferase
BBT72VS00	CmoCh19G002930	16.1938	Thaumatin-like protein
BBT72VS00	CmoCh17G009790	15.2515	Peroxidase
BBT72VS00	CmoCh19G002910	14.7819	Thaumatin-like protein
BBT72VS00	CmoCh19G007920	14.6175	expansin-like A3
BBT72VS00	CmoCh14G003470	14.389	NDR1/HIN1-like protein 10
BBT72VS00	CmoCh05G002020	14.3682	Patatin
BBT72VS00	CmoCh19G000690	13.7837	Serine proteinase inhibitor
BBT72VS00	CmoCh08G010630	13.7565	ethylene-responsive transcription factor ERF098-like
BBT72VS00	CmoCh19G002900	13.597	Thaumatin-like protein
BBT72VS00	CmoCh20G003430	13.5796	Peroxidase
BBT72VS00	CmoCh19G002920	13.5379	Thaumatin-like protein
BBT72VS00	CmoCh19G007900	13.5019	expansin-like A3
BBT72VS00	CmoCh19G002890	13.433	Thaumatin-like protein
BBT72VS00	CmoCh19G007910	13.4013	expansin-like A2
BBT72VS00	CmoCh19G007930	13.3955	expansin-like A2
BBT72VS00	CmoCh11G007670	13.3612	Flavin-containing monooxygenase
BBT72VS00	CmoCh19G000720	13.1246	Serine proteinase inhibitor
BBT72VS00	CmoCh19G000730	12.7969	Serine proteinase inhibitor
BBT72VS00	CmoCh19G005430	12.7489	pathogenesis-related protein 1-like
BBT72VS00	CmoCh08G002920	12.465	ethylene-responsive transcription factor 1B-like
BBT72VS00	CmoCh18G002560	12.4178	Stigma-specific Stig1 family protein, putative
BBT72VS00	CmoCh04G028630	12.0872	metalloendoproteinase 2-MMP-like
BBT72VS00	CmoCh19G002870	12.0584	chaperone protein dnaJ 20, chloroplastic-like
BBT72VS00	CmoCh03G003910	11.9913	Laccase
BBT72VS00	CmoCh14G002380	11.899	2-oxoglutarate (2OG) and Fe(II)-dependent oxygenase superfamily protein
BBT72VS00	CmoCh16G008930	11.751	DUF4228 domain protein
BBT72VS00	CmoCh19G000700	11.5021	Serine proteinase inhibitor
BBT72VS00	CmoCh19G007940	11.4401	expansin-like A3
BBT72VS00	CmoCh19G005500	11.3598	pathogenesis-related protein 1-like
BBT72VS00	CmoCh12G004740	11.337	calmodulin-like protein 12
BBT72VS00	CmoCh02G015180	11.0841	GDSL esterase/lipase 1-like
BBT72VS00	CmoCh11G010690	10.8949	P-loop containing nucleoside triphosphate hydrolases superfamily protein
BBT72VS00	CmoCh11G005090	10.8882	EamA domain-containing protein
BBT72VS00	CmoCh17G004330	10.8468	1-aminocyclopropane-1-carboxylate synthase 1
BBT72VS00	CmoCh12G004780	10.7334	calmodulin-like protein 12
BBT72VS00	CmoCh19G000680	10.7202	Serine proteinase inhibitor
BBT72VS00	CmoCh19G000800	10.6534	Unknown protein
BBT72VS00	CmoCh06G006990	10.6253	caffeic acid 3-O-methyltransferase-like
BBT72VS00	CmoCh15G003220	10.4477	metalloendoproteinase 2-MMP-like
BBT72VS00	CmoCh01G007460	10.4397	Peroxidase
BBT72VS00	CmoCh19G005440	10.3579	pathogenesis-related protein 1-like
BBT72VS00	CmoCh13G002460	10.3101	Carbonic anhydrase
BBT72VS00	CmoCh18G010230	10.2267	VQ motif-containing protein 8
BBT72VS00	CmoCh03G013920	10.2231	gibberellin 2-beta-dioxygenase
BBT72VS00	CmoCh09G011110	10.1479	extensin-1-like
BBT72VS00	CmoCh15G004070	10.1446	CASP-like protein
BBT72VS00	CmoCh06G015780	10.1173	Peroxiredoxin
BBT72VS00	CmoCh20G002930	10.0117	transcription factor JUNGBRUNNEN 1-like
BBT72VS00	CmoCh10G006700	9.82153	bark storage protein A
BBT72VS00	CmoCh12G006990	9.79897	Unknown protein
BBT72VS00	CmoCh19G000670	9.76835	Proteinase inhibitor
BBT72VS00	CmoCh19G000740	9.70121	Pumpkin fruit trypsin inhibitor
BBT72VS00	CmoCh04G011740	9.69202	Protein-serine/threonine phosphatase
BBT72VS00	CmoCh19G005410	9.67243	Pathogenesis-related protein 1
BBT72VS00	CmoCh04G027630	9.65371	CASP-like protein
BBT72VS00	CmoCh07G000570	9.63139	Germin-like protein
BBT72VS00	CmoCh13G007890	9.54988	Stigma-specific protein Stig1
BBT72VS00	CmoCh05G006880	9.52774	Unknown protein
BBT72VS00	CmoCh06G006980	9.50908	caffeic acid 3-O-methyltransferase-like
BBT72VS00	CmoCh02G004010	9.48278	AB hydrolase-1 domain-containing protein
BBT72VS00	CmoCh03G012930	9.44225	Glutaredoxin
BBT72VS00	CmoCh17G005440	9.43552	O-methyltransferase family protein
BBT72VS00	CmoCh15G014860	9.32697	LRR receptor-like serine/threonine-protein kinase GSO1
BBT72VS00	CmoCh04G007720	9.29309	heavy metal-associated isoprenylated plant protein 39-like
BBT72VS00	CmoCh04G020350	9.29063	calmodulin-like
BBT72VS00	CmoCh13G009730	9.27287	2-oxoglutarate (2OG) and Fe(II)-dependent oxygenase superfamily protein
BBT72VS00	CmoCh10G005170	9.27269	alpha/beta hydrolase domain-containing protein 17B-like
BBT72VS00	CmoCh04G005720	9.25032	cucumisin-like
BBT72VS00	CmoCh15G009030	9.22555	defensin-like protein 1
BBT72VS00	CmoCh14G012810	9.18504	ankyrin repeat-containing protein NPR4-like isoform X3
BBT72VS00	CmoCh07G008550	9.18226	Exocyst subunit Exo70 family protein
BBT72VS00	CmoCh03G007570	9.15118	S-adenosyl-L-methionine-dependent methyltransferases superfamily protein
BBT72VS00	CmoCh16G003400	9.1376	Trypsin inhibitor 1-like
BBT72VS00	CmoCh12G004750	9.13121	calmodulin-like protein 12
BBT72VS00	CmoCh19G000830	9.11592	Unknown protein
BBT72VS00	CmoCh07G004700	9.02903	heavy metal-associated isoprenylated plant protein 43-like
BBT72VS00	CmoCh10G012200	8.84943	calmodulin-binding protein 60 G-like
BBT72VS00	CmoCh17G009100	8.84196	Unknown protein
BBT72VS00	CmoCh01G007310	8.83493	cation/H(+) antiporter 24-like
BBT72VS00	CmoCh15G006150	8.72513	Unknown protein
BBT72VS00	CmoCh15G004050	8.68711	Phorbol-ester/DAG-type domain-containing protein
BBT72VS00	CmoCh13G009740	8.63314	Unknown protein
BBT72VS00	CmoCh12G004770	8.59514	calmodulin-like protein 12
BBT72VS00	CmoCh05G012800	8.57426	acidic mammalian chitinase-like
BBT72VS00	CmoCh15G013850	8.53973	alcohol dehydrogenase-like 4
BBT72VS00	CmoCh06G001350	8.4576	Protease inhibitor protein
BBT72VS00	CmoCh06G013350	8.436	ethylene-responsive transcription factor ERF096-like
BBT72VS00	CmoCh15G013950	8.41412	protein DMR6-LIKE OXYGENASE 2-like
BBT72VS00	CmoCh14G013410	8.36914	rop guanine nucleotide exchange factor 12
BBT72VS00	CmoCh12G004760	8.31544	calmodulin-like protein 12
BBT72VS00	CmoCh03G002380	8.30891	Cysteine dioxygenase
BBT72VS00	CmoCh03G009020	8.27696	Phosphoenolpyruvate carboxykinase (ATP)
BBT72VS00	CmoCh01G018940	8.27282	alpha/beta-Hydrolases superfamily protein
BBT72VS00	CmoCh01G005940	8.26411	zinc finger protein ZAT12-like isoform X1
BBT72VS00	CmoCh10G011820	8.25203	Resistance gene-like protein
BBT72VS00	CmoCh17G007230	8.25008	(thale cress) hypothetical protein
BBT72VS00	CmoCh04G011730	8.24945	Protein-serine/threonine phosphatase
BBT72VS00	CmoCh15G004470	8.1732	Unknown protein
BBT72VS00	CmoCh02G007260	8.17226	LOB domain-containing protein
BBT72VS00	CmoCh03G004210	8.16636	Cysteine/Histidine-rich C1 domain family protein
BBT72VS00	CmoCh02G011910	8.16436	L-ascorbate oxidase homolog
BBT72VS00	CmoCh04G001490	8.16073	2-oxoglutarate (2OG) and Fe(II)-dependent oxygenase superfamily protein
BBT72VS00	CmoCh10G008480	8.15314	(1->3)-beta-glucan endohydrolase
BBT72VS00	CmoCh16G003410	8.1011	Unknown protein
BBT72VS00	CmoCh16G008560	8.09316	oligopeptide transporter 3-like
BBT72VS00	CmoCh18G003330	8.08998	TIR domain-containing protein
BBT72VS00	CmoCh15G011610	8.07987	Phorbol-ester/DAG-type domain-containing protein
BBT72VS00	CmoCh07G006450	8.07826	Uncharacterised conserved protein UCP031279
BBT72VS00	CmoCh04G029220	8.074	Unknown protein
BBT72VS00	CmoCh02G001820	8.0253	cellulose synthase-like protein H1
BBT72VS00	CmoCh15G009040	8.00125	defensin J1-2-like
BBT72VS00	CmoCh06G006970	7.97309	caffeic acid 3-O-methyltransferase-like
BBT72VS00	CmoCh18G002430	7.97115	Peroxidase
BBT72VS00	CmoCh14G018450	7.9676	ethylene-responsive transcription factor ERF098-like
BBT72VS00	CmoCh17G002250	7.96041	Amine oxidase
BBT72VS00	CmoCh05G001940	7.90702	Unknown protein
BBT72VS00	CmoCh07G000560	7.81439	Germin-like protein
BBT72VS00	CmoCh04G021390	7.8116	alpha/beta-Hydrolases superfamily protein
BBT72VS00	CmoCh20G007570	7.80854	Rhodanese domain-containing protein
BBT72VS00	CmoCh02G015190	7.80546	GDSL esterase/lipase 1-like
BBT72VS00	CmoCh07G005240	7.80031	L-ascorbate oxidase
BBT72VS00	CmoCh04G023680	7.79174	CoA ligase
BBT72VS00	CmoCh11G015780	7.77074	mitochondrial phosphate carrier protein 3, mitochondrial-like
BBT72VS00	CmoCh01G018850	7.76954	HXXXD-type acyl-transferase family protein
BBT72VS00	CmoCh09G008740	7.75853	NAC domain protein
BBT72VS00	CmoCh13G005050	7.75117	FAD-binding Berberine family protein
BBT72VS00	CmoCh04G025210	7.74554	wall-associated receptor kinase 2-like
BBT72VS00	CmoCh10G005890	7.71922	Unknown protein
BBT72VS00	CmoCh07G005480	7.68874	Rab family
BBT72VS00	CmoCh11G014930	7.64977	chaperone protein dnaJ 20, chloroplastic-like
BBT72VS00	CmoCh11G007100	7.60762	Cytokinin dehydrogenase
BBT72VS00	CmoCh04G005820	7.57648	Patatin
BBT72VS00	CmoCh09G007500	7.55828	Unknown protein
BBT72VS00	CmoCh19G002840	7.55163	Peroxidase
BBT72VS00	CmoCh07G008560	7.54705	Unknown protein
BBT72VS00	CmoCh01G010630	7.52632	Transmembrane protein, putative
BBT72VS00	CmoCh19G007170	7.50903	Auxin-responsive protein
BBT72VS00	CmoCh19G002660	7.45999	Glycosyltransferase
BBT72VS00	CmoCh17G000130	7.45096	LysM domain-containing protein
BBT72VS00	CmoCh10G000680	7.45056	Citrulline--aspartate ligase
BBT72VS00	CmoCh16G003370	7.44548	Unknown protein
BBT72VS00	CmoCh01G007020	7.41429	Omega-3 fatty acid desaturase
BBT72VS00	CmoCh14G018220	7.39529	Inhibitor of trypsin and hageman factor-like
BBT72VS00	CmoCh10G005760	7.39365	umecyanin-like
BBT72VS00	CmoCh19G004000	7.3889	ankyrin repeat-containing protein BDA1-like
BBT72VS00	CmoCh14G019990	7.38871	protein ECERIFERUM 1-like
BBT72VS00	CmoCh16G009060	7.38498	glucose-6-phosphate/phosphate translocator 2, chloroplastic-like
BBT72VS00	CmoCh11G005030	7.3773	Unknown protein
BBT72VS00	CmoCh12G010430	7.37282	H(+)-exporting diphosphatase
BBT72VS00	CmoCh17G003990	7.36471	Unknown protein
BBT72VS00	CmoCh09G011150	7.35167	30S ribosomal protein S12
BBT72VS00	CmoCh01G011450	7.34838	pirin-like protein
BBT72VS00	CmoCh01G013870	7.31762	CYSTM domain-containing protein
BBT72VS00	CmoCh17G009780	7.29179	Peroxidase
BBT72VS00	CmoCh04G010760	7.27697	Encodes a protein whose expression is responsive to nematode infection, putative
BBT72VS00	CmoCh11G013940	7.26325	Glycosyltransferase
BBT72VS00	CmoCh18G002580	7.25899	ankyrin repeat-containing protein ITN1-like
BBT72VS00	CmoCh19G004460	7.24904	dynamin-like protein
BBT72VS00	CmoCh04G025200	7.23661	wall-associated receptor kinase 2-like
BBT72VS00	CmoCh14G004380	7.2317	BZIP transcription factor family protein
BBT72VS00	CmoCh14G003350	7.22386	Transcription repressor
BBT72VS00	CmoCh03G006590	7.21963	endochitinase-like
BBT72VS00	CmoCh20G010320	7.21856	NAC domain-containing protein
BBT72VS00	CmoCh12G011610	7.21348	VQ domain-containing protein
BBT72VS00	CmoCh03G005430	7.20832	Unknown protein
BBT72VS00	CmoCh02G010630	7.19721	protein TPX2-like isoform X3
BBT72VS00	CmoCh08G004820	7.19036	protein NIM1-INTERACTING 1
BBT72VS00	CmoCh01G002260	7.18953	cytochrome P450 705A22-like
BBT72VS00	CmoCh19G007840	7.16818	lysine histidine transporter-like 8
BBT72VS00	CmoCh08G004440	7.16462	DUF761 domain-containing protein
BBT72VS00	CmoCh19G003040	7.16128	ENTH domain-containing protein
BBT72VS00	CmoCh15G015080	7.1479	WAT1-related protein
BBT72VS00	CmoCh08G009650	7.14666	Nucleotide-diphospho-sugar transferase
BBT72VS00	CmoCh03G011510	7.12534	Purple acid phosphatase
BBT72VS00	CmoCh02G017950	7.12303	ethylene-responsive transcription factor 1B-like
BBT72VS00	CmoCh10G012230	7.09018	calmodulin-binding protein 60 G-like
BBT72VS00	CmoCh04G016180	7.07603	Protein IDA-like
BBT72VS00	CmoCh16G001940	7.0728	Plant invertase/pectin methylesterase inhibitor superfamily protein
BBT72VS00	CmoCh13G009720	7.02196	2-oxoglutarate (2OG) and Fe(II)-dependent oxygenase superfamily protein
BBT72VS00	CmoCh11G002830	7.01336	transcription factor JAMYB-like
BBT72VS00	CmoCh04G020380	7.00467	calmodulin-like
BBT72VS00	CmoCh11G018910	7.00259	S-type anion channel SLAH1-like
BBT72VS00	CmoCh08G006990	7.00159	Protein-serine/threonine phosphatase
BBT72VS00	CmoCh15G014830	6.99677	LRR receptor-like serine/threonine-protein kinase GSO1
BBT72VS00	CmoCh09G010720	6.99161	Chitin synthase 2
BBT72VS00	CmoCh02G012500	6.97482	Peroxidase
BBT72VS00	CmoCh13G003510	6.96389	subtilisin-like protease SBT5.4
BBT72VS00	CmoCh14G016960	6.95494	Sugar transporter ERD6
BBT72VS00	CmoCh04G006290	6.94972	aspartic proteinase CDR1-like
BBT72VS00	CmoCh07G006570	6.93427	Calcium-transporting ATPase
BBT72VS00	CmoCh20G005410	6.93205	Glycosyltransferase
BBT72VS00	CmoCh15G012730	6.93131	Thaumatin-like protein
BBT72VS00	CmoCh20G010650	6.92733	RING-type E3 ubiquitin transferase
BBT72VS00	CmoCh12G001970	6.92488	PH, RCC1 and FYVE domains-containing protein 1-like
BBT72VS00	CmoCh07G002170	6.92385	NAC domain-containing protein 73-like
BBT72VS00	CmoCh08G008390	6.88554	Glycosyltransferase
BBT72VS00	CmoCh20G000450	6.87809	Dirigent protein
BBT72VS00	CmoCh06G002600	6.87496	PAR1 protein
BBT72VS00	CmoCh14G002310	6.86007	thaumatin-like protein 1b
BBT72VS00	CmoCh14G009730	6.84149	Pectin lyase-like superfamily protein
BBT72VS00	CmoCh01G020650	6.84022	DEP domain-containing mTOR-interacting protein
BBT72VS00	CmoCh04G020370	6.83131	calmodulin-like
BBT72VS00	CmoCh06G014340	6.82981	basic 7S globulin-like
BBT72VS00	CmoCh20G009870	6.82156	cytochrome P450 81D11-like
BBT72VS00	CmoCh11G009630	6.81359	Tyrosine phosphatase family protein
BBT72VS00	CmoCh19G000820	6.81063	Unknown protein
BBT72VS00	CmoCh03G010450	6.79286	WRKY DNA-binding protein 51, putative
BBT72VS00	CmoCh06G006910	6.78597	caffeic acid 3-O-methyltransferase-like
BBT72VS00	CmoCh11G016070	6.77721	WRKY protein
BBT72VS00	CmoCh05G012280	6.73693	pathogenesis-related protein PR-4-like
BBT72VS00	CmoCh07G002420	6.73455	heat stress transcription factor B-2a-like
BBT72VS00	CmoCh09G000240	6.73389	protein PIN-LIKES 3-like
BBT72VS00	CmoCh13G006790	6.7206	TIR domain-containing protein
BBT72VS00	CmoCh14G018730	6.72031	protein NRT1/ PTR FAMILY 5.2-like
BBT72VS00	CmoCh17G008210	6.71959	DUF761 domain-containing protein
BBT72VS00	CmoCh02G016080	6.68491	ethylene-responsive transcription factor 1A-like
BBT72VS00	CmoCh03G000730	6.68083	Loricrin-like
BBT72VS00	CmoCh11G020150	6.67199	1-aminocyclopropane-1-carboxylate oxidase 1
BBT72VS00	CmoCh01G018860	6.64853	HXXXD-type acyl-transferase family protein
BBT72VS00	CmoCh13G006770	6.64535	polyphenol oxidase, chloroplastic-like
BBT72VS00	CmoCh14G011850	6.61437	B12D protein
BBT72VS00	CmoCh05G003720	6.61013	Flotillin-like
BBT72VS00	CmoCh14G018210	6.58981	Inhibitor of trypsin and hageman factor-like
BBT72VS00	CmoCh15G006170	6.5616	extensin-like
BBT72VS00	CmoCh01G005430	6.55597	Xyloglucan endotransglucosylase/hydrolase
BBT72VS00	CmoCh06G013700	6.54803	Calmodulin
BBT72VS00	CmoCh14G000560	6.54713	2-oxoglutarate (2OG) and Fe(II)-dependent oxygenase superfamily protein
BBT72VS00	CmoCh11G004790	6.54624	chitotriosidase-1-like
BBT72VS00	CmoCh11G005490	6.53423	3-ketoacyl-CoA synthase
BBT72VS00	CmoCh09G011070	6.51755	extensin-3-like isoform X1
BBT72VS00	CmoCh20G003310	6.50535	trans-cinnamate 4-monooxygenase-like
BBT72VS00	CmoCh01G011110	6.49732	cellulose synthase-like protein E1
BBT72VS00	CmoCh17G002330	6.49293	sugar transport protein 13-like
BBT72VS00	CmoCh02G004930	6.49287	benzyl alcohol O-benzoyltransferase-like
BBT72VS00	CmoCh01G013700	6.49225	aspartyl protease family protein 2-like
BBT72VS00	CmoCh09G001790	6.4852	cytochrome P450 CYP82D47-like
BBT72VS00	CmoCh09G002640	6.4767	Cytochrome P450
BBT72VS00	CmoCh03G004300	6.47516	Cyclin-dependent protein kinase inhibitor SMR4
BBT72VS00	CmoCh12G004790	6.47254	calmodulin-like protein 12
BBT72VS00	CmoCh11G013960	6.46579	Glycosyltransferase
BBT72VS00	CmoCh08G007230	6.46322	60S ribosomal protein L28-2 isoform B
BBT72VS00	CmoCh18G009140	6.45564	protein NUCLEAR FUSION DEFECTIVE 4
BBT72VS00	CmoCh06G006930	6.45244	caffeic acid 3-O-methyltransferase-like
BBT72VS00	CmoCh11G005480	6.45209	SOUL heme-binding protein
BBT72VS00	CmoCh05G004350	6.44047	WRKY domain-containing protein
BBT72VS00	CmoCh13G005060	6.3825	berberine bridge enzyme-like 15
BBT72VS00	CmoCh18G004980	6.37608	FAD-binding Berberine family protein
BBT72VS00	CmoCh03G009730	6.37018	Cytochrome P450
BBT72VS00	CmoCh12G013420	6.36873	Acco20
BBT72VS00	CmoCh20G009640	6.34386	benzyl alcohol O-benzoyltransferase-like
BBT72VS00	CmoCh02G010870	6.33962	Cytochrome p450
BBT72VS00	CmoCh06G011270	6.3197	BON1-associated protein 2-like
BBT72VS00	CmoCh19G000970	6.31813	ethylene-responsive transcription factor 1B-like
BBT72VS00	CmoCh01G005560	6.30142	berberine bridge enzyme-like 26
BBT72VS00	CmoCh07G013740	6.29449	EGF domain-specific O-linked N-acetylglucosamine transferase-like
BBT72VS00	CmoCh01G016580	6.29168	protein EXORDIUM-like 1
BBT72VS00	CmoCh20G009860	6.28102	Cytochrome P450
BBT72VS00	CmoCh12G003370	6.26878	ornithine decarboxylase-like
BBT72VS00	CmoCh02G006300	6.26533	Coiled-coil domain-containing protein 18, putative isoform 2
BBT72VS00	CmoCh04G013280	6.25836	BTB/POZ domain protein
BBT72VS00	CmoCh04G013360	6.24895	GRAM domain-containing protein
BBT72VS00	CmoCh19G009610	6.23133	cysteine-rich repeat secretory protein 38-like
BBT72VS00	CmoCh16G009340	6.22795	lactoylglutathione lyase-like
BBT72VS00	CmoCh19G005400	6.22379	pathogenesis-related protein 1-like
BBT72VS00	CmoCh20G009420	6.21982	pleiotropic drug resistance protein 1-like
BBT72VS00	CmoCh16G002140	6.20271	Unknown protein
BBT72VS00	CmoCh03G013940	6.16463	Glucan endo-1,3-beta-D-glucosidase
BBT72VS00	CmoCh20G008010	6.1482	auxin-responsive protein SAUR24-like
BBT72VS00	CmoCh19G005420	6.12123	pathogenesis-related protein 1-like
BBT72VS00	CmoCh02G002760	6.1204	Cytokinin riboside 5'-monophosphate phosphoribohydrolase
BBT72VS00	CmoCh04G020360	6.10932	calmodulin-like
BBT72VS00	CmoCh09G006740	6.10805	cytochrome P450 CYP72A219-like
BBT72VS00	CmoCh03G013740	6.10476	WRKY protein
BBT72VS00	CmoCh15G011720	6.10393	cucumisin-like
BBT72VS00	CmoCh01G001890	6.09053	cinnamoyl-CoA reductase 2-like
BBT72VS00	CmoCh04G011070	6.08853	RING-type E3 ubiquitin transferase
BBT72VS00	CmoCh04G020320	6.05934	calmodulin-like
BBT72VS00	CmoCh20G000490	6.05838	Peroxidase
BBT72VS00	CmoCh01G016670	6.05695	SKI/DACH domain-containing protein 1
BBT72VS00	CmoCh09G007220	6.04439	HTH myb-type domain-containing protein
BBT72VS00	CmoCh11G009610	6.04161	WRKY transcription factor SUSIBA2-like
BBT72VS00	CmoCh03G005150	6.03985	Wound-responsive family protein
BBT72VS00	CmoCh18G004990	6.03271	Berberine bridge enzyme-like
BBT72VS00	CmoCh07G012240	6.03226	RING-type E3 ubiquitin transferase
BBT72VS00	CmoCh05G012270	6.03221	pathogenesis-related protein PR-4-like
BBT72VS00	CmoCh04G002510	6.01494	Exocyst subunit Exo70 family protein
BBT72VS00	CmoCh16G002150	6.01105	Unknown protein
BBT72VS00	CmoCh12G006800	6.00553	phosphate transporter PHO1 homolog 3-like
BBT72VS00	CmoCh05G012520	6.00471	VQ domain-containing protein
BBT72VS00	CmoCh09G002630	5.99071	Cytochrome P450
BBT72VS00	CmoCh06G010500	5.95071	Glycosyltransferase
BBT72VS00	CmoCh12G011370	5.94974	Calcium-transporting ATPase
BBT72VS00	CmoCh06G001950	5.91371	Short-chain dehydrogenase/reductase
BBT72VS00	CmoCh03G014540	5.90707	Germin-like protein
BBT72VS00	CmoCh11G007150	5.90123	IQ domain-containing protein IQM1-like
BBT72VS00	CmoCh04G025540	5.901	extensin-like
BBT72VS00	CmoCh20G000520	5.89886	Peroxidase
BBT72VS00	CmoCh03G005680	5.89881	F-box family protein with a domain of unknown function (DUF295)
BBT72VS00	CmoCh16G011510	5.8976	AAI domain-containing protein
BBT72VS00	CmoCh02G012440	5.89549	Dirigent protein
BBT72VS00	CmoCh18G004080	5.87774	WRKY protein
BBT72VS00	CmoCh08G010590	5.8749	MYB transcription factor
BBT72VS00	CmoCh08G004800	5.87308	MYB transcription factor
BBT72VS00	CmoCh20G000510	5.86986	Unknown protein
BBT72VS00	CmoCh01G010350	5.86413	alcohol dehydrogenase-like
BBT72VS00	CmoCh20G009900	5.84997	cytochrome P450 81D1-like
BBT72VS00	CmoCh01G000320	5.84834	cytochrome P450 71A1-like
BBT72VS00	CmoCh02G001970	5.83065	RAB GTPase homolog A1F
BBT72VS00	CmoCh13G006000	5.82886	Protein of unknown function, DUF584
BBT72VS00	CmoCh13G007100	5.82578	Receptor-like serine/threonine-protein kinase
BBT72VS00	CmoCh14G002240	5.8052	alpha carbonic anhydrase 7-like
BBT72VS00	CmoCh17G008870	5.80423	4-coumarate--CoA ligase
BBT72VS00	CmoCh16G001310	5.79565	Actin depolymerizing factor, putative
BBT72VS00	CmoCh15G005930	5.78474	ethylene-responsive transcription factor ERF110-like
BBT72VS00	CmoCh13G007070	5.77995	Receptor-like serine/threonine-protein kinase
BBT72VS00	CmoCh00G001280	5.77714	Peroxidase
BBT72VS00	CmoCh13G008170	5.7725	vinorine synthase-like
BBT72VS00	CmoCh04G025710	5.71934	ethylene-responsive transcription factor ERF110-like
BBT72VS00	CmoCh05G000760	5.71498	NADH-ubiquinone reductase complex 1 MLRQ subunit
BBT72VS00	CmoCh11G013380	5.70338	Peroxidase
BBT72VS00	CmoCh05G007700	5.69034	cytochrome P450 CYP73A100-like
BBT72VS00	CmoCh04G013960	5.68642	auxin-regulated gene involved in organ size
BBT72VS00	CmoCh08G003750	5.67314	Glutamic acid-rich protein
BBT72VS00	CmoCh20G006510	5.66584	RAB GTPase homolog A1F
BBT72VS00	CmoCh09G006420	5.65355	ABSCISIC ACID-INSENSITIVE 5-like protein 2
BBT72VS00	CmoCh15G000470	5.65344	LL-diaminopimelate aminotransferase
BBT72VS00	CmoCh07G010720	5.65161	glutathione S-transferase U8-like
BBT72VS00	CmoCh13G003690	5.62975	Protein GL2-INTERACTING REPRESSOR 1
BBT72VS00	CmoCh15G001460	5.61391	MENTAL domain-containing protein
BBT72VS00	CmoCh18G007070	5.61162	Multidrug resistance protein ABC transporter family isoform 1
BBT72VS00	CmoCh17G008320	5.60908	cucumber peeling cupredoxin-like
BBT72VS00	CmoCh20G007420	5.60866	Phytocyanin domain-containing protein
BBT72VS00	CmoCh09G010680	5.60675	Unknown protein
BBT72VS00	CmoCh03G001830	5.6008	Unknown protein
BBT72VS00	CmoCh09G007490	5.60074	Long-chain-alcohol oxidase
BBT72VS00	CmoCh17G000580	5.5978	RING-type E3 ubiquitin transferase
BBT72VS00	CmoCh03G007540	5.5945	heavy metal-associated isoprenylated plant protein 43-like
BBT72VS00	CmoCh04G005470	5.59347	WRKY domain-containing protein
BBT72VS00	CmoCh11G003940	5.5926	DUF761 domain-containing protein
BBT72VS00	CmoCh16G011940	5.57557	HMA domain-containing protein
BBT72VS00	CmoCh09G003180	5.57506	transcription factor MYB36-like
BBT72VS00	CmoCh16G011520	5.57202	AAI domain-containing protein
BBT72VS00	CmoCh17G001160	5.57151	vesicle-associated membrane protein 722-like
BBT72VS00	CmoCh02G005810	5.56989	Patatin
BBT72VS00	CmoCh02G014510	5.55677	Mannan endo-1,4-beta-mannosidase
BBT72VS00	CmoCh03G004560	5.54698	zinc finger protein ZAT11-like
BBT72VS00	CmoCh04G024820	5.53878	Unknown protein
BBT72VS00	CmoCh03G001710	5.53839	Methyltransf_11 domain-containing protein
BBT72VS00	CmoCh11G006400	5.51544	E3 ubiquitin-protein ligase ATL42-like
BBT72VS00	CmoCh05G010110	5.51103	Cytokinin riboside 5'-monophosphate phosphoribohydrolase
BBT72VS00	CmoCh03G005870	5.5073	RING/U-box superfamily protein
BBT72VS00	CmoCh02G002230	5.50711	Protein kinase domain-containing protein
BBT72VS00	CmoCh05G006980	5.49748	RING-H2 finger protein ATL56-like
BBT72VS00	CmoCh05G010850	5.48671	nicotianamine synthase-like
BBT72VS00	CmoCh11G013370	5.48471	Peroxidase
BBT72VS00	CmoCh18G004690	5.47967	phospholipase A1-Igamma1, chloroplastic-like
BBT72VS00	CmoCh02G005390	5.46579	VQ domain-containing protein
BBT72VS00	CmoCh04G003920	5.46346	Glutamate dehydrogenase
BBT72VS00	CmoCh15G012740	5.45676	Thaumatin-like protein
BBT72VS00	CmoCh09G011000	5.43271	pathogen-related protein-like
BBT72VS00	CmoCh14G001110	5.42769	Unknown protein
BBT72VS00	CmoCh14G000940	5.42483	PAR1 protein
BBT72VS00	CmoCh08G009660	5.42148	Nucleotide-diphospho-sugar transferase
BBT72VS00	CmoCh04G025560	5.41436	Unknown protein
BBT72VS00	CmoCh02G009980	5.40693	Pectinesterase
BBT72VS00	CmoCh17G003370	5.39944	major allergen Pru ar 1-like
BBT72VS00	CmoCh10G012240	5.39764	calmodulin-binding protein 60 A-like
BBT72VS00	CmoCh04G027620	5.393	CASP-like protein
BBT72VS00	CmoCh14G014520	5.37084	Protein tweety-2 like
BBT72VS00	CmoCh18G004790	5.35801	cationic amino acid transporter 1-like
BBT72VS00	CmoCh15G011220	5.35077	heavy metal-associated isoprenylated plant protein 39-like
BBT72VS00	CmoCh20G000300	5.34815	Unknown protein
BBT72VS00	CmoCh01G007930	5.3464	DUF4408 domain protein
BBT72VS00	CmoCh12G009560	5.33531	ABC transporter B family member 4-like
BBT72VS00	CmoCh03G008520	5.33273	Unknown protein
BBT72VS00	CmoCh17G007270	5.32687	Profilin
BBT72VS00	CmoCh01G013920	5.27026	VQ motif-containing protein 22-like
BBT72VS00	CmoCh10G009020	5.26717	RING-type E3 ubiquitin transferase
BBT72VS00	CmoCh11G000470	5.26653	Mitochondrial pyruvate carrier
BBT72VS00	CmoCh06G008240	5.26601	GUB_WAK_bind domain-containing protein
BBT72VS00	CmoCh17G000220	5.26091	alpha/beta-Hydrolases superfamily protein
BBT72VS00	CmoCh17G009910	5.25956	transcription factor JAMYB-like
BBT72VS00	CmoCh11G017310	5.2536	myb-related protein 308-like
BBT72VS00	CmoCh19G004020	5.24136	Ankyrin repeat-containing protein
BBT72VS00	CmoCh02G007690	5.23754	calmodulin-binding receptor-like cytoplasmic kinase 1
BBT72VS00	CmoCh16G000740	5.22927	WRKY domain-containing protein
BBT72VS00	CmoCh18G008170	5.22922	protein ASPARTIC PROTEASE IN GUARD CELL 2-like
BBT72VS00	CmoCh16G009220	5.22595	NAD(P)H dehydrogenase (quinone)
BBT72VS00	CmoCh04G008350	5.22431	F-box protein At5g49610-like
BBT72VS00	CmoCh14G005840	5.21638	NAC domain-containing protein 100-like
BBT72VS00	CmoCh14G010740	5.21599	cinnamoyl coa reductase
BBT72VS00	CmoCh03G011060	5.2159	RING-H2 finger protein ATL70-like
BBT72VS00	CmoCh14G017780	5.21456	leucine-rich repeat extensin-like protein 6
BBT72VS00	CmoCh13G010550	5.21259	LEAF RUST 10 DISEASE-RESISTANCE LOCUS RECEPTOR-LIKE PROTEIN KINASE-like 1.2
BBT72VS00	CmoCh04G024830	5.21154	Protein disulfide-isomerase
BBT72VS00	CmoCh06G005680	5.21071	Homogentisate solanesyltransferase, chloroplastic
BBT72VS00	CmoCh10G008490	5.19985	(1->3)-beta-glucan endohydrolase
BBT72VS00	CmoCh16G004910	5.19701	VQ motif-containing protein 1-like
BBT72VS00	CmoCh06G008600	5.19307	haloacid dehalogenase-like hydrolase domain-containing protein Sgpp
BBT72VS00	CmoCh16G011930	5.18279	phosphatidylinositol/phosphatidylcholine transfer protein SFH11 isoform X1
BBT72VS00	CmoCh10G000670	5.18244	Unknown protein
BBT72VS00	CmoCh12G010160	5.17988	Glycosyltransferase
BBT72VS00	CmoCh10G012340	5.17593	calmodulin-binding protein 60 A-like isoform X2
BBT72VS00	CmoCh08G005640	5.1687	4-coumarate--CoA ligase
BBT72VS00	CmoCh14G006440	5.16796	protein ALTERED XYLOGLUCAN 4-like
BBT72VS00	CmoCh06G007800	5.16608	auxin-responsive protein SAUR36-like
BBT72VS00	CmoCh13G008520	5.16383	11-beta-hydroxysteroid dehydrogenase 1B-like
BBT72VS00	CmoCh16G008020	5.1634	1-deoxy-D-xylulose-5-phosphate synthase
BBT72VS00	CmoCh13G007080	5.15281	Receptor-like serine/threonine-protein kinase
BBT72VS00	CmoCh02G004230	5.13921	UPF0496 protein At4g34320-like
BBT72VS00	CmoCh18G010360	5.13818	protein NIM1-INTERACTING 2
BBT72VS00	CmoCh13G008530	5.13532	auxin-responsive protein SAUR71-like
BBT72VS00	CmoCh02G003990	5.11803	isoflavone reductase-like protein
BBT72VS00	CmoCh19G004030	5.11572	ankyrin repeat-containing protein BDA1-like
BBT72VS00	CmoCh19G005060	5.10595	Unknown protein
BBT72VS00	CmoCh01G018830	5.09489	HXXXD-type acyl-transferase family protein
BBT72VS00	CmoCh10G007540	5.07492	Unknown protein
BBT72VS00	CmoCh18G008150	5.07167	GRAM domain-containing protein
BBT72VS00	CmoCh20G000650	5.0566	Lipoxygenase
BBT72VS00	CmoCh04G022580	5.03819	Glutamate decarboxylase
BBT72VS00	CmoCh11G007880	5.03608	arabinogalactan peptide 13-like
BBT72VS00	CmoCh03G006570	5.03458	endochitinase-like
BBT72VS00	CmoCh14G010170	5.03442	Ribonuclease T(2)
BBT72VS00	CmoCh12G011020	5.03223	kunitz trypsin inhibitor 1-like
BBT72VS00	CmoCh15G001690	5.03132	Peroxidase
BBT72VS00	CmoCh10G012350	5.03094	calmodulin-binding protein 60 G-like isoform X1
BBT72VS00	CmoCh11G002090	5.02327	respiratory burst oxidase homolog protein A-like
BBT72VS00	CmoCh06G017120	5.01235	EG45-like domain containing protein
BBT72VS00	CmoCh04G022560	5.00546	DUF629 domain-containing protein
BBT72VS00	CmoCh09G005360	5.00304	Pentatricopeptide repeat-containing protein
BBT72VS00	CmoCh10G001650	4.98501	two-component response regulator ARR5-like
BBT72VS00	CmoCh06G015410	4.98359	Unknown protein
BBT72VS00	CmoCh15G002450	4.98316	Methyl esterase
BBT72VS00	CmoCh19G000650	4.98168	inhibitor of trypsin and hageman factor-like
BBT72VS00	CmoCh04G028660	4.97463	metalloendoproteinase 2-MMP-like
BBT72VS00	CmoCh01G013470	4.96818	Glycosyltransferase
BBT72VS00	CmoCh14G012180	4.96776	cytochrome P450 71A1-like
BBT72VS00	CmoCh06G009680	4.96073	protein mago nashi homolog
BBT72VS00	CmoCh15G011400	4.95646	cucumisin-like
BBT72VS00	CmoCh03G002730	4.95472	RING-type E3 ubiquitin transferase
BBT72VS00	CmoCh14G018470	4.9339	Inorganic phosphate transporter 1-1
BBT72VS00	CmoCh09G007510	4.91851	protein MODIFYING WALL LIGNIN-2-like
BBT72VS00	CmoCh14G014960	4.91545	Protein of unknown function (DUF 3339)
BBT72VS00	CmoCh17G001650	4.91319	Inorganic phosphate transporter 1-1
BBT72VS00	CmoCh11G007680	4.9107	Sucrose synthase
BBT72VS00	CmoCh18G005030	4.89828	berberine bridge enzyme-like 18
BBT72VS00	CmoCh05G004310	4.89686	ankyrin repeat-containing protein ITN1-like
BBT72VS00	CmoCh19G008710	4.88681	sodium/potassium/calcium exchanger 1-like
BBT72VS00	CmoCh12G008030	4.88111	Arogenate dehydratase
BBT72VS00	CmoCh04G015120	4.87981	cucumisin-like
BBT72VS00	CmoCh09G000510	4.86424	12-oxophytodienoate reductase 1
BBT72VS00	CmoCh14G013170	4.84055	Leucine-rich repeat protein kinase family protein
BBT72VS00	CmoCh14G013560	4.83242	pleiotropic drug resistance protein 1-like
BBT72VS00	CmoCh13G001120	4.83233	Haloacid dehalogenase-like hydrolase (HAD) superfamily protein
BBT72VS00	CmoCh05G007840	4.82674	Endoglucanase
BBT72VS00	CmoCh07G009470	4.82538	Phenylalanine ammonia-lyase
BBT72VS00	CmoCh04G015290	4.82459	Pectinesterase
BBT72VS00	CmoCh06G009970	4.81989	Phosphoglycerate mutase family protein
BBT72VS00	CmoCh10G005750	4.8187	cucumber peeling cupredoxin-like
BBT72VS00	CmoCh12G001140	4.8154	Phosphoglycerate mutase (2,3-diphosphoglycerate-dependent)
BBT72VS00	CmoCh05G012490	4.81158	Ankyrin repeat-containing protein
BBT72VS00	CmoCh15G014680	4.80954	receptor-like protein 12 isoform X1
BBT72VS00	CmoCh19G005480	4.80323	pathogenesis-related protein 1-like
BBT72VS00	CmoCh02G011530	4.79478	protein PSY2
BBT72VS00	CmoCh11G013930	4.79326	Cinnamyl alcohol dehydrogenase
BBT72VS00	CmoCh15G014290	4.78545	Peroxidase
BBT72VS00	CmoCh18G010850	4.78079	Protein of unknown function (DUF1262)
BBT72VS00	CmoCh01G019210	4.76672	Protein of unknown function (DUF1645)
BBT72VS00	CmoCh01G012250	4.75537	Receptor-like serine/threonine-protein kinase
BBT72VS00	CmoCh02G016140	4.75091	expansin-like B1
BBT72VS00	CmoCh14G000700	4.75056	lactosylceramide 4-alpha-galactosyltransferase-like
BBT72VS00	CmoCh11G009910	4.75019	L-allo-threonine aldolase
BBT72VS00	CmoCh04G026710	4.74152	DUF4050 domain-containing protein
BBT72VS00	CmoCh15G007040	4.73962	MYB transcription factor
BBT72VS00	CmoCh14G006690	4.72563	polygalacturonase QRT3-like
BBT72VS00	CmoCh12G007990	4.71106	Plant protein of unknown function (DUF868)
BBT72VS00	CmoCh04G000970	4.70799	WRKY transcription factor 55
BBT72VS00	CmoCh20G006360	4.70719	cellulose synthase-like protein H1
BBT72VS00	CmoCh19G006330	4.70198	Protein of unknown function (DUF1645)
BBT72VS00	CmoCh01G018840	4.70032	Unknown protein
BBT72VS00	CmoCh01G004520	4.69832	Aluminium induced protein with YGL and LRDR motifs
BBT72VS00	CmoCh10G001660	4.69638	protein EDS1L-like
BBT72VS00	CmoCh04G018510	4.69364	Protein DETOXIFICATION
BBT72VS00	CmoCh06G004030	4.68984	Glycosyltransferase
BBT72VS00	CmoCh14G003330	4.67721	Protein GL2-INTERACTING REPRESSOR 1
BBT72VS00	CmoCh03G009450	4.67711	VQ domain-containing protein
BBT72VS00	CmoCh19G000660	4.66865	Pumpkin fruit trypsin inhibitor
BBT72VS00	CmoCh04G011250	4.66453	WRKY protein
BBT72VS00	CmoCh03G008610	4.65793	Unknown protein
BBT72VS00	CmoCh17G006910	4.65509	beta-fructofuranosidase, insoluble isoenzyme CWINV1-like
BBT72VS00	CmoCh03G008620	4.65505	Polyadenylate-binding protein 2-like
BBT72VS00	CmoCh01G009100	4.65239	Endoglucanase
BBT72VS00	CmoCh04G025550	4.64573	extensin-1-like
BBT72VS00	CmoCh09G006410	4.63606	Hexosyltransferase
BBT72VS00	CmoCh20G001200	4.6345	ABC transporter G family member 23
BBT72VS00	CmoCh01G000840	4.63048	Leucine-rich repeat protein kinase family protein
BBT72VS00	CmoCh15G006080	4.62066	serine decarboxylase-like
BBT72VS00	CmoCh14G009600	4.61987	PMEI domain-containing protein
BBT72VS00	CmoCh14G018200	4.61963	Proteinase inhibitor
BBT72VS00	CmoCh19G004470	4.61702	expansin-like B1
BBT72VS00	CmoCh19G007970	4.60735	NAC domain-containing protein
BBT72VS00	CmoCh02G011180	4.58771	acidic endochitinase-like
BBT72VS00	CmoCh03G010070	4.58384	GLABRA2 expression modulator
BBT72VS00	CmoCh18G008770	4.57583	Annexin
BBT72VS00	CmoCh08G010620	4.57325	ethylene-responsive transcription factor 1B-like
BBT72VS00	CmoCh19G002520	4.57077	Unknown protein
BBT72VS00	CmoCh19G005890	4.56704	Plant basic secretory protein (BSP) family protein
BBT72VS00	CmoCh19G001010	4.55757	transcription factor MYB4-like
BBT72VS00	CmoCh14G004310	4.55647	Myb family transcription factor family protein
BBT72VS00	CmoCh07G007330	4.55611	CDPK-related kinase
BBT72VS00	CmoCh14G013160	4.55115	Leucine-rich repeat protein kinase family protein
BBT72VS00	CmoCh03G008010	4.55108	Unknown protein
BBT72VS00	CmoCh15G014280	4.54826	Peroxidase
BBT72VS00	CmoCh01G018180	4.54614	Myb transcription factor
BBT72VS00	CmoCh10G008600	4.54594	Tyrosine-protein phosphatase
BBT72VS00	CmoCh14G003100	4.54516	Glutaredoxin domain-containing protein
BBT72VS00	CmoCh14G015060	4.52943	Unknown protein
BBT72VS00	CmoCh03G011670	4.52498	PDR8
BBT72VS00	CmoCh06G009570	4.51814	NAC domain-containing protein 40-like
BBT72VS00	CmoCh11G006130	4.51491	Unknown protein
BBT72VS00	CmoCh08G002040	4.51255	pfkB-like carbohydrate kinase family protein
BBT72VS00	CmoCh18G006650	4.51198	Ferredoxin
BBT72VS00	CmoCh13G011100	4.50088	ABC transporter B family member 25-like
BBT72VS00	CmoCh06G013730	4.49787	Unknown protein
BBT72VS00	CmoCh06G013020	4.49475	mitochondrial import receptor subunit TOM9-2-like
BBT72VS00	CmoCh11G013950	4.49388	Glycosyltransferase
BBT72VS00	CmoCh06G007490	4.47349	Phospholipase D
BBT72VS00	CmoCh13G008640	4.4734	root hair specific 4
BBT72VS00	CmoCh04G005840	4.47138	beta-glucuronosyltransferase GlcAT14B-like
BBT72VS00	CmoCh14G016850	4.47079	CASP-like protein
BBT72VS00	CmoCh03G008600	4.46166	Phospho-2-dehydro-3-deoxyheptonate aldolase
BBT72VS00	CmoCh20G002170	4.45353	Cell wall integrity and stress response component 1
BBT72VS00	CmoCh07G002850	4.45269	cysteine-rich receptor-like protein kinase 29
BBT72VS00	CmoCh03G009640	4.44432	Peroxidase
BBT72VS00	CmoCh04G001170	4.44182	Neuronal PAS domain-containing protein 4
BBT72VS00	CmoCh03G009400	4.44104	Phytosulfokine-beta
BBT72VS00	CmoCh14G002940	4.44073	PEBP (phosphatidylethanolamine-binding protein) family protein
BBT72VS00	CmoCh04G022550	4.43973	Glutamate decarboxylase
BBT72VS00	CmoCh02G001020	4.43784	Phospho-N-acetylmuramoyl-pentapeptide-transferase, putative
BBT72VS00	CmoCh11G004470	4.43651	Unknown protein
BBT72VS00	CmoCh02G012510	4.43363	Peroxidase
BBT72VS00	CmoCh16G002100	4.42261	Unknown protein
BBT72VS00	CmoCh11G016280	4.41515	EF hand calcium-binding protein family
BBT72VS00	CmoCh19G006120	4.4148	Glycosyltransferase
BBT72VS00	CmoCh18G009150	4.41267	Pectate lyase
BBT72VS00	CmoCh02G001400	4.41017	coumaroyl-CoA:anthocyanidin 3-O-glucoside-6''-O-coumaroyltransferase 1-like
BBT72VS00	CmoCh04G008570	4.40975	bifunctional aspartate aminotransferase and glutamate/aspartate-prephenate aminotransferase
BBT72VS00	CmoCh08G008380	4.40916	Glycosyltransferase
BBT72VS00	CmoCh11G020060	4.40608	RING-H2 finger protein ATL40-like
BBT72VS00	CmoCh09G000250	4.4021	AT-hook motif nuclear-localized protein
BBT72VS00	CmoCh11G003930	4.40173	Hexosyltransferase
BBT72VS00	CmoCh01G013730	4.40094	NAC domain-containing protein
BBT72VS00	CmoCh03G005670	4.39823	Rhamnogalacturonan endolyase
BBT72VS00	CmoCh06G016310	4.39546	extensin-2-like
BBT72VS00	CmoCh06G000470	4.39025	NADH:cytochrome B5 reductase 1
BBT72VS00	CmoCh02G000180	4.38818	transcription factor JUNGBRUNNEN 1-like
BBT72VS00	CmoCh14G020220	4.38754	Glutathione S-transferase
BBT72VS00	CmoCh19G005900	4.38111	22.0 kDa heat shock protein-like
BBT72VS00	CmoCh05G005410	4.37561	Unknown protein
BBT72VS00	CmoCh15G004210	4.37534	Unknown protein
BBT72VS00	CmoCh15G014620	4.37271	MADS-box protein AGL42-like
BBT72VS00	CmoCh11G001540	4.37234	ABC transporter A family member 7-like
BBT72VS00	CmoCh17G007180	4.36833	Leucine-rich repeat protein kinase family protein
BBT72VS00	CmoCh17G007070	4.36675	inorganic pyrophosphatase 2
BBT72VS00	CmoCh02G015010	4.36461	Amp-dependent synthetase and ligase
BBT72VS00	CmoCh19G010770	4.35798	Phosphotyrosine protein phosphatases superfamily protein
BBT72VS00	CmoCh11G006140	4.35641	Unknown protein
BBT72VS00	CmoCh18G006190	4.35465	C2 and GRAM domain-containing protein
BBT72VS00	CmoCh14G001630	4.34056	Exocyst subunit Exo70 family protein
BBT72VS00	CmoCh02G017380	4.32166	3-ketoacyl-CoA thiolase 2, peroxisomal-like
BBT72VS00	CmoCh10G007530	4.31781	BHLH domain-containing protein
BBT72VS00	CmoCh14G020770	4.31189	BON1-associated protein 2-like
BBT72VS00	CmoCh04G017480	4.31183	Expansin
BBT72VS00	CmoCh13G011060	4.30647	UDP-arabinopyranose mutase
BBT72VS00	CmoCh06G004020	4.30469	thaumatin-like protein 1b
BBT72VS00	CmoCh09G000490	4.292	WUSCHEL-related homeobox 8-like
BBT72VS00	CmoCh18G009730	4.29074	ethylene-responsive transcription factor WRI1-like
BBT72VS00	CmoCh12G006010	4.28847	Glutamate receptor
BBT72VS00	CmoCh03G012560	4.28517	Heat stress transcription factor B-2a-like
BBT72VS00	CmoCh07G011420	4.28465	NAD(P)-binding Rossmann-fold superfamily protein
BBT72VS00	CmoCh13G009310	4.27721	RING-type E3 ubiquitin transferase
BBT72VS00	CmoCh03G003950	4.27316	glutathione S-transferase U8-like
BBT72VS00	CmoCh09G001860	4.27267	cytochrome P450 CYP82D47-like
BBT72VS00	CmoCh17G009160	4.26923	cytochrome P450 705A22-like
BBT72VS00	CmoCh15G008990	4.26869	phytosulfokine receptor 1-like
BBT72VS00	CmoCh13G001100	4.26718	Lipoxygenase
BBT72VS00	CmoCh16G003360	4.26275	trypsin inhibitor 1-like
BBT72VS00	CmoCh14G020320	4.25282	3-phosphoshikimate 1-carboxyvinyltransferase
BBT72VS00	CmoCh07G001040	4.25247	VQ motif-containing protein 10-like
BBT72VS00	CmoCh14G013610	4.25205	boron transporter 4-like
BBT72VS00	CmoCh05G008070	4.24986	Disease resistance protein
BBT72VS00	CmoCh10G005840	4.24685	EIN3-binding F-box protein 1-like
BBT72VS00	CmoCh15G006570	4.24616	Calcium-binding EF-hand family protein
BBT72VS00	CmoCh14G007170	4.24117	lysine histidine transporter 1-like
BBT72VS00	CmoCh02G015440	4.23792	Protein of unknown function (DUF1442)
BBT72VS00	CmoCh18G013380	4.23649	Spermidine synthase
BBT72VS00	CmoCh10G008440	4.23035	wall-associated receptor kinase-like 2
BBT72VS00	CmoCh06G016690	4.22849	Glycerophosphodiester phosphodiesterase
BBT72VS00	CmoCh17G003340	4.22757	Protein phosphatase 2C family protein
BBT72VS00	CmoCh19G007410	4.22754	myb-related protein 308-like
BBT72VS00	CmoCh04G027180	4.22403	Unknown protein
BBT72VS00	CmoCh11G018900	4.22035	mitogen-activated protein kinase kinase kinase 18-like
BBT72VS00	CmoCh13G010540	4.2158	LEAF RUST 10 DISEASE-RESISTANCE LOCUS RECEPTOR-LIKE PROTEIN KINASE-like 1.2
BBT72VS00	CmoCh01G003650	4.21454	RING-type E3 ubiquitin transferase
BBT72VS00	CmoCh17G001670	4.2133	WAT1-related protein
BBT72VS00	CmoCh15G011570	4.20931	ethylene-responsive transcription factor 2-like
BBT72VS00	CmoCh19G011460	4.20855	X8 domain-containing protein
BBT72VS00	CmoCh08G005940	4.19741	Plant protein of unknown function (DUF247)
BBT72VS00	CmoCh02G001520	4.19672	blue copper protein-like
BBT72VS00	CmoCh11G007460	4.1925	serine/threonine-protein kinase RIPK-like
BBT72VS00	CmoCh15G008120	4.1924	Calcium-transporting ATPase
BBT72VS00	CmoCh05G007960	4.19146	ABC transporter B family member 4-like
BBT72VS00	CmoCh17G007880	4.19109	thionin-like protein 2
BBT72VS00	CmoCh14G001510	4.18801	ADP-ribosylation factor GTPase-activating protein AGD7-like
BBT72VS00	CmoCh04G005800	4.17568	protein BRASSINOSTEROID INSENSITIVE 1-like
BBT72VS00	CmoCh01G015120	4.17192	Phosphoenolpyruvate carboxykinase (ATP)
BBT72VS00	CmoCh06G001750	4.16232	WRKY protein
BBT72VS00	CmoCh20G003420	4.15577	Peroxidase
BBT72VS00	CmoCh03G004160	4.15449	Unknown protein
BBT72VS00	CmoCh01G020440	4.14799	Alcohol dehydrogenase, putative
BBT72VS00	CmoCh06G011670	4.14734	3-phosphoshikimate 1-carboxyvinyltransferase
BBT72VS00	CmoCh20G009130	4.1403	Inositol-tetrakisphosphate 1-kinase
BBT72VS00	CmoCh06G000880	4.13992	11 kDa late embryogenesis abundant protein-like
BBT72VS00	CmoCh08G011960	4.13622	flowering-promoting factor 1-like protein 1
BBT72VS00	CmoCh17G004180	4.1355	Cysteine synthase
BBT72VS00	CmoCh02G006920	4.13315	trans-cinnamate 4-monooxygenase
BBT72VS00	CmoCh02G004190	4.13182	Non-symbiotic hemoglobin, putative
BBT72VS00	CmoCh05G007020	4.12893	Xyloglucan endotransglucosylase/hydrolase
BBT72VS00	CmoCh04G004660	4.12339	Phytosulfokine-beta
BBT72VS00	CmoCh04G009610	4.11936	PB1 domain-containing protein
BBT72VS00	CmoCh18G008780	4.11606	Annexin
BBT72VS00	CmoCh02G015000	4.11465	Unknown protein
BBT72VS00	CmoCh14G018460	4.10317	ethylene-responsive transcription factor 1B
BBT72VS00	CmoCh01G004070	4.10308	Regulator of Vps4 activity in the MVB pathway protein, putative
BBT72VS00	CmoCh18G011500	4.09723	phosphate transporter PHO1 homolog 3-like
BBT72VS00	CmoCh11G003010	4.09439	Protein DETOXIFICATION
BBT72VS00	CmoCh02G014990	4.09133	oxalate--CoA ligase-like
BBT72VS00	CmoCh19G005560	4.08904	Magnesium transporter
BBT72VS00	CmoCh07G001150	4.08845	cytochrome P450 710A11-like
BBT72VS00	CmoCh10G002320	4.0797	t-SNARE coiled-coil homology domain-containing protein
BBT72VS00	CmoCh20G000440	4.07752	Dirigent protein
BBT72VS00	CmoCh12G000640	4.07714	Heat shock protein DnaJ, cysteine-rich domain containing protein
BBT72VS00	CmoCh12G006790	4.0765	phosphate transporter PHO1 homolog 3-like
BBT72VS00	CmoCh20G008550	4.07524	isoflavone reductase-like protein
BBT72VS00	CmoCh02G000640	4.05954	1-aminocyclopropane-1-carboxylate oxidase 1-like
BBT72VS00	CmoCh14G010330	4.05841	ras-related protein RGP1-like
BBT72VS00	CmoCh20G005310	4.05464	Zinc finger (C3HC4-type RING finger) family protein
BBT72VS00	CmoCh04G009900	4.05188	calmodulin-like
BBT72VS00	CmoCh11G011730	4.05084	protein SRC2 homolog
BBT72VS00	CmoCh11G020520	4.04835	cysteine-rich and transmembrane domain-containing protein A-like
BBT72VS00	CmoCh07G007410	4.04571	Unknown protein
BBT72VS00	CmoCh06G010480	4.0427	Glycosyltransferase
BBT72VS00	CmoCh03G010440	4.03817	serine/threonine-protein kinase PBS1-like
BBT72VS00	CmoCh14G001360	4.03373	RHOMBOID-like protein
BBT72VS00	CmoCh19G005050	4.0332	L-type lectin-domain containing receptor kinase IX.1-like
BBT72VS00	CmoCh09G009820	4.02542	pirin-like protein
BBT72VS00	CmoCh14G016090	4.02457	transcription factor MYB78-like
BBT72VS00	CmoCh09G010550	4.02388	Calcium-binding EF-hand family protein
BBT72VS00	CmoCh10G009340	4.02282	Tetratricopeptide repeat (TPR)-like superfamily protein isoform 1
BBT72VS00	CmoCh04G005850	4.02165	Unknown protein
BBT72VS00	CmoCh04G015630	4.02034	Unknown protein
BBT72VS00	CmoCh11G005700	4.01139	MAPK kinase substrate protein At1g80180-like
BBT72VS00	CmoCh10G005740	4.01052	mitogen-activated protein kinase kinase kinase 17-like
BBT72VS00	CmoCh05G007130	4.00338	(R)-mandelonitrile lyase 1-like
BBT72VS00	CmoCh14G009490	3.99986	neuronal acetylcholine receptor subunit alpha-2-like
BBT72VS00	CmoCh15G014610	3.99855	pfkB-like carbohydrate kinase family protein
BBT72VS00	CmoCh08G002240	3.99842	cell division control protein 45 homolog
BBT72VS00	CmoCh14G017620	3.99498	Non-specific lipid-transfer protein-like protein
BBT72VS00	CmoCh20G000130	3.98955	Late embryogenesis abundant (LEA) hydroxyproline-rich glycoprotein family
BBT72VS00	CmoCh18G013570	3.98866	myosin-2
BBT72VS00	CmoCh02G011190	3.98275	acidic endochitinase-like
BBT72VS00	CmoCh17G004480	3.98137	Glycosyltransferase
BBT72VS00	CmoCh03G011650	3.98133	pleiotropic drug resistance protein 2-like
BBT72VS00	CmoCh05G011170	3.97986	acetylajmalan esterase-like
BBT72VS00	CmoCh10G012220	3.97313	calmodulin-binding protein 60 G-like isoform X1
BBT72VS00	CmoCh10G003390	3.97188	Protein DETOXIFICATION
BBT72VS00	CmoCh07G012580	3.97159	receptor-like protein kinase FERONIA
BBT72VS00	CmoCh05G010560	3.96794	Germin-like protein
BBT72VS00	CmoCh13G006760	3.96665	polyphenol oxidase, chloroplastic-like
BBT72VS00	CmoCh10G007420	3.96135	Beta-galactosidase
BBT72VS00	CmoCh17G000320	3.95997	LOB domain-containing protein
BBT72VS00	CmoCh05G002030	3.95957	Patatin
BBT72VS00	CmoCh03G013070	3.95586	E3 ubiquitin-protein ligase ATL41-like
BBT72VS00	CmoCh16G013330	3.94959	Dirigent protein
BBT72VS00	CmoCh08G003480	3.94573	Exostosin domain-containing protein
BBT72VS00	CmoCh11G014770	3.94567	RING-type E3 ubiquitin transferase
BBT72VS00	CmoCh09G009010	3.93921	Receptor-like serine/threonine-protein kinase
BBT72VS00	CmoCh06G002100	3.93778	Pyruvate decarboxylase
BBT72VS00	CmoCh05G007750	3.93352	protein BONZAI 3
BBT72VS00	CmoCh03G013560	3.92919	2-oxoglutarate (2OG) and Fe(II)-dependent oxygenase superfamily protein
BBT72VS00	CmoCh02G012890	3.92082	chaperonin-like RbcX protein 2, chloroplastic
BBT72VS00	CmoCh04G026870	3.91799	ABC transporter G family member 24-like
BBT72VS00	CmoCh07G006210	3.91606	Agamous-like MADS-box protein AGL61-like isoform X1
BBT72VS00	CmoCh19G003930	3.91308	Protein kinase domain-containing protein
BBT72VS00	CmoCh14G003430	3.91088	Cytokinin riboside 5'-monophosphate phosphoribohydrolase
BBT72VS00	CmoCh20G008860	3.91005	extra-large guanine nucleotide-binding protein 1-like
BBT72VS00	CmoCh19G001550	3.90956	Pectate lyase
BBT72VS00	CmoCh14G014970	3.90907	NAD(P)-linked oxidoreductase superfamily protein
BBT72VS00	CmoCh11G000530	3.9088	phosphopantothenoylcysteine decarboxylase-like
BBT72VS00	CmoCh13G005410	3.90761	Remorin_C domain-containing protein
BBT72VS00	CmoCh07G010350	3.90513	WD repeat-containing protein 44
BBT72VS00	CmoCh15G011760	3.90394	metalloendoproteinase 1-MMP
BBT72VS00	CmoCh03G005020	3.89871	internal alternative NAD(P)H-ubiquinone oxidoreductase A1, mitochondrial-like
BBT72VS00	CmoCh04G030180	3.8938	RING-type E3 ubiquitin transferase
BBT72VS00	CmoCh16G004790	3.89229	epidermis-specific secreted glycoprotein EP1-like
BBT72VS00	CmoCh07G004220	3.88408	Chaperone protein dnaJ 11
BBT72VS00	CmoCh17G011030	3.86893	Transmembrane protein
BBT72VS00	CmoCh14G006450	3.84764	alpha-dioxygenase 1
BBT72VS00	CmoCh15G000180	3.84494	PPM-type phosphatase domain-containing protein
BBT72VS00	CmoCh03G007030	3.84401	thiosulfate sulfurtransferase 18-like
BBT72VS00	CmoCh12G013370	3.84374	Cytokinin dehydrogenase
BBT72VS00	CmoCh03G001720	3.84148	Pyrroline-5-carboxylate reductase
BBT72VS00	CmoCh17G008950	3.84088	Clp R domain-containing protein
BBT72VS00	CmoCh14G020280	3.84086	Pectinesterase
BBT72VS00	CmoCh15G004060	3.84053	CASP-like protein
BBT72VS00	CmoCh20G003450	3.83791	Peroxidase
BBT72VS00	CmoCh14G016420	3.83669	ethylene-responsive transcription factor ERF071-like
BBT72VS00	CmoCh03G006460	3.83612	Unknown protein
BBT72VS00	CmoCh11G004800	3.83222	acidic mammalian chitinase-like
BBT72VS00	CmoCh11G011140	3.83207	Purple acid phosphatase
BBT72VS00	CmoCh13G005480	3.8305	endochitinase EP3
BBT72VS00	CmoCh04G000790	3.82098	RING-type E3 ubiquitin transferase
BBT72VS00	CmoCh03G011660	3.81978	zf-RVT domain-containing protein
BBT72VS00	CmoCh16G008170	3.81838	Methionine S-methyltransferase
BBT72VS00	CmoCh15G009620	3.81411	Core-2/I-branching beta-1,6-N-acetylglucosaminyltransferase family protein
BBT72VS00	CmoCh16G004110	3.81391	Protein kinase domain-containing protein
BBT72VS00	CmoCh16G000180	3.81354	2-oxoglutarate (2OG) and Fe(II)-dependent oxygenase superfamily protein
BBT72VS00	CmoCh15G006400	3.80177	thioredoxin M5, chloroplastic-like
BBT72VS00	CmoCh20G000290	3.79906	IQ domain-containing protein IQM2-like
BBT72VS00	CmoCh02G017930	3.79702	Inorganic phosphate transporter 1-1
BBT72VS00	CmoCh15G003930	3.78818	Protein of unknown function, DUF547
BBT72VS00	CmoCh03G005420	3.77916	cysteine-rich receptor-like protein kinase 26
BBT72VS00	CmoCh09G000830	3.7772	Unknown protein
BBT72VS00	CmoCh04G005460	3.77497	WRKY protein
BBT72VS00	CmoCh00G001510	3.77333	Peroxidase
BBT72VS00	CmoCh20G004330	3.77313	Expansin
BBT72VS00	CmoCh05G011110	3.7652	F-box protein PP2-B15-like
BBT72VS00	CmoCh04G014470	3.76221	synaptotagmin-3-like
BBT72VS00	CmoCh19G002850	3.75877	Peroxidase
BBT72VS00	CmoCh03G011180	3.75726	COPII coat assembly protein SEC16, putative
BBT72VS00	CmoCh04G031130	3.7563	Glutamine amidotransferase type-1 domain-containing protein
BBT72VS00	CmoCh20G000900	3.75134	chaperonin-like RbcX protein 2, chloroplastic
BBT72VS00	CmoCh01G013480	3.74827	anthocyanidin 3-O-glucosyltransferase 2-like
BBT72VS00	CmoCh06G016170	3.74688	transcription factor bHLH128-like
BBT72VS00	CmoCh06G013740	3.74644	Sulfate adenylyltransferase
BBT72VS00	CmoCh11G007690	3.73907	Unknown protein
BBT72VS00	CmoCh04G024250	3.73845	Myotubularin-like protein
BBT72VS00	CmoCh08G012220	3.7379	major allergen Pru ar 1-like
BBT72VS00	CmoCh07G010150	3.73661	zinc finger protein ZAT11-like
BBT72VS00	CmoCh05G007500	3.73239	ENTH domain-containing protein
BBT72VS00	CmoCh04G020340	3.72953	calmodulin-2/4-like
BBT72VS00	CmoCh13G007770	3.72348	Unknown protein
BBT72VS00	CmoCh04G013150	3.7232	LOB domain-containing protein
BBT72VS00	CmoCh02G008660	3.71975	dof zinc finger protein DOF3.2-like
BBT72VS00	CmoCh14G007400	3.71745	WRKY protein
BBT72VS00	CmoCh02G018080	3.7161	cytochrome P450 94A2-like
BBT72VS00	CmoCh04G031310	3.71538	Protein of unknown function (DUF803)
BBT72VS00	CmoCh16G009750	3.71037	pirin-like protein
BBT72VS00	CmoCh13G002950	3.71003	Plant protein of unknown function (DUF868)
BBT72VS00	CmoCh15G006800	3.70679	Unknown protein
BBT72VS00	CmoCh16G001000	3.70581	delta(1)-pyrroline-2-carboxylate reductase
BBT72VS00	CmoCh03G004190	3.70481	Cysteine/Histidine-rich C1 domain family protein
BBT72VS00	CmoCh14G013440	3.68988	mitochondrial arginine transporter BAC2-like
BBT72VS00	CmoCh02G011760	3.68975	CDPK-related kinase 6-like
BBT72VS00	CmoCh16G012780	3.68936	transcription factor MYC2-like
BBT72VS00	CmoCh08G004780	3.68868	gibberellin 2-beta-dioxygenase 2-like
BBT72VS00	CmoCh08G008060	3.68759	RING-type E3 ubiquitin transferase
BBT72VS00	CmoCh06G016570	3.685	Glutathione peroxidase
BBT72VS00	CmoCh04G010840	3.68448	Myb/SANT-like DNA-binding domain protein
BBT72VS00	CmoCh11G004480	3.6819	Cellulose synthase
BBT72VS00	CmoCh12G005440	3.67878	FKBP-type peptidyl-prolyl cis-trans isomerase family protein
BBT72VS00	CmoCh03G000560	3.6752	Heat Stress Transcription Factor family protein
BBT72VS00	CmoCh04G007550	3.67	6-phosphogluconate dehydrogenase, decarboxylating
BBT72VS00	CmoCh15G005850	3.66262	Unknown protein
BBT72VS00	CmoCh11G014340	3.66182	Pathogenesis-related protein 1
BBT72VS00	CmoCh19G002710	3.66035	metacaspase-1-like
BBT72VS00	CmoCh05G007120	3.65792	(R)-mandelonitrile lyase 1-like
BBT72VS00	CmoCh01G000850	3.65047	Leucine-rich repeat protein kinase family protein
BBT72VS00	CmoCh03G003110	3.64652	RING-type E3 ubiquitin transferase
BBT72VS00	CmoCh05G010550	3.64424	Unknown protein
BBT72VS00	CmoCh15G010610	3.63144	Unknown protein
BBT72VS00	CmoCh03G005530	3.63119	Patatin
BBT72VS00	CmoCh03G009380	3.62778	Growth-regulating factor
BBT72VS00	CmoCh10G010210	3.62526	L-ascorbate oxidase
BBT72VS00	CmoCh17G004310	3.62523	heavy metal-associated isoprenylated plant protein 39-like
BBT72VS00	CmoCh15G011870	3.61799	L-lactate dehydrogenase
BBT72VS00	CmoCh17G007590	3.61577	protein PLANT CADMIUM RESISTANCE 8
BBT72VS00	CmoCh01G013170	3.61572	Non-specific serine/threonine protein kinase
BBT72VS00	CmoCh09G007000	3.61425	VQ motif-containing protein 22-like
BBT72VS00	CmoCh02G014290	3.61039	P-loop NTPase domain-containing protein LPA1 homolog 1-like
BBT72VS00	CmoCh18G011510	3.60718	Unknown protein
BBT72VS00	CmoCh14G014650	3.60323	Membrane-associated 30 kDa protein
BBT72VS00	CmoCh16G004370	3.59646	50S ribosomal protein L33-like
BBT72VS00	CmoCh03G006130	3.59422	microtubule-associated protein 70-5
BBT72VS00	CmoCh17G002270	3.59232	Amine oxidase
BBT72VS00	CmoCh14G015050	3.58812	Aldo_ket_red domain-containing protein
BBT72VS00	CmoCh16G004780	3.58505	epidermis-specific secreted glycoprotein EP1-like
BBT72VS00	CmoCh05G011100	3.58246	F-box protein PP2-B15-like
BBT72VS00	CmoCh04G000650	3.57998	Unknown protein
BBT72VS00	CmoCh01G004510	3.57886	UDP-arabinopyranose mutase
BBT72VS00	CmoCh09G001800	3.57819	cytochrome P450 CYP82D47-like
BBT72VS00	CmoCh14G021330	3.57585	acidic endochitinase-like
BBT72VS00	CmoCh07G007210	3.57273	Protein of unknown function (DUF1685)
BBT72VS00	CmoCh14G002420	3.57253	pistil-specific extensin-like protein
BBT72VS00	CmoCh07G008500	3.57251	syntaxin-121-like
BBT72VS00	CmoCh18G000700	3.57234	Arf-GAP domain-containing protein
BBT72VS00	CmoCh19G002800	3.57099	Annexin
BBT72VS00	CmoCh14G017800	3.57062	VAN3-binding protein-like isoform X1
BBT72VS00	CmoCh04G003610	3.56929	Receptor protein kinase, putative
BBT72VS00	CmoCh08G006440	3.56578	thionin-like protein 2
BBT72VS00	CmoCh06G006400	3.56182	Calmodulin-like protein 17
BBT72VS00	CmoCh16G013320	3.56182	Unknown protein
BBT72VS00	CmoCh11G011760	3.55667	Respiratory burst oxidase
BBT72VS00	CmoCh09G003720	3.55538	Protein kinase domain-containing protein
BBT72VS00	CmoCh02G015040	3.55438	protein LURP-one-related 4-like
BBT72VS00	CmoCh01G003210	3.55356	UDP-glucuronate decarboxylase
BBT72VS00	CmoCh01G003190	3.55315	Indole-3-acetic acid-induced protein ARG2
BBT72VS00	CmoCh07G007400	3.54706	salicylic acid-binding protein 2-like
BBT72VS00	CmoCh10G010070	3.54591	Receptor-like serine/threonine-protein kinase
BBT72VS00	CmoCh03G008470	3.5445	Ras-related protein
BBT72VS00	CmoCh16G008670	3.5392	Diacylglycerol kinase
BBT72VS00	CmoCh15G004370	3.53908	Unknown protein
BBT72VS00	CmoCh06G010510	3.53615	Glycosyltransferase
BBT72VS00	CmoCh06G011760	3.52836	Pectinesterase
BBT72VS00	CmoCh20G006940	3.52737	heavy metal-associated isoprenylated plant protein 16-like
BBT72VS00	CmoCh16G002120	3.51516	MDIS1-interacting receptor like kinase 2-like
BBT72VS00	CmoCh02G001800	3.51175	mitogen-activated protein kinase kinase kinase 18-like
BBT72VS00	CmoCh17G013460	3.5089	ethylene-responsive transcription factor ERF113-like
BBT72VS00	CmoCh14G010610	3.50365	Unknown protein
BBT72VS00	CmoCh01G002710	3.49835	Protein kinase superfamily protein
BBT72VS00	CmoCh14G017420	3.49679	Receptor-like serine/threonine-protein kinase
BBT72VS00	CmoCh15G006790	3.49671	Protein disulfide-isomerase
BBT72VS00	CmoCh16G000170	3.49587	Unknown protein
BBT72VS00	CmoCh05G010530	3.49455	leucine aminopeptidase 2, chloroplastic-like
BBT72VS00	CmoCh01G002280	3.49392	Ras-related protein
BBT72VS00	CmoCh17G009090	3.4892	Unknown protein
BBT72VS00	CmoCh04G022070	3.48687	Polcalcin Jun o
BBT72VS00	CmoCh14G000040	3.48252	Serine/threonine-protein phosphatase
BBT72VS00	CmoCh05G011510	3.47385	mitogen-activated protein kinase kinase kinase NPK1
BBT72VS00	CmoCh10G007790	3.47196	Mechanosensitive ion channel protein
BBT72VS00	CmoCh03G003120	3.47154	Unknown protein
BBT72VS00	CmoCh17G011150	3.47148	Histone H2A
BBT72VS00	CmoCh11G019000	3.46383	Aconitate hydratase
BBT72VS00	CmoCh18G011860	3.46278	F-box/kelch-repeat protein SKIP11-like
BBT72VS00	CmoCh07G003110	3.4564	WRKY transcription factor 2-like protein
BBT72VS00	CmoCh06G000790	3.45432	bZIP transcription factor TGA10-like
BBT72VS00	CmoCh16G007800	3.45143	ATP-dependent 6-phosphofructokinase
BBT72VS00	CmoCh03G001630	3.44875	Unknown protein
BBT72VS00	CmoCh04G003620	3.44088	Aconitate hydratase
BBT72VS00	CmoCh06G000990	3.43835	Protein kinase domain-containing protein
BBT72VS00	CmoCh07G000910	3.4365	endoplasmic reticulum oxidoreductin-1-like
BBT72VS00	CmoCh11G004780	3.43506	Protein of unknown function (DUF679)
BBT72VS00	CmoCh15G002950	3.43143	Glutaredoxin domain-containing protein
BBT72VS00	CmoCh13G007990	3.43017	Pectate lyase
BBT72VS00	CmoCh20G008560	3.42801	Adenine nucleotide alpha hydrolases-like superfamily protein
BBT72VS00	CmoCh07G006430	3.42617	ACT domain-containing protein ACR1-like
BBT72VS00	CmoCh18G007500	3.42451	cytochrome P450 71B19-like
BBT72VS00	CmoCh04G025100	3.42429	Calcium-binding EF-hand family protein
BBT72VS00	CmoCh01G003220	3.40831	Unknown protein
BBT72VS00	CmoCh09G009550	3.40538	heterodimeric geranylgeranyl pyrophosphate synthase small subunit, chloroplastic-like
BBT72VS00	CmoCh12G002830	3.40389	Nucleotide-sugar transporter family protein
BBT72VS00	CmoCh01G000730	3.40325	Glutamate receptor
BBT72VS00	CmoCh13G010560	3.39925	protein SAR DEFICIENT 1 isoform X1
BBT72VS00	CmoCh02G001770	3.39792	Arogenate dehydratase
BBT72VS00	CmoCh14G020860	3.39476	Acetyl-CoA carboxytransferase
BBT72VS00	CmoCh11G011520	3.39368	phosphoglycerate mutase-like protein AT74
BBT72VS00	CmoCh20G001210	3.39323	Hydroxyproline O-arabinosyltransferase 3
BBT72VS00	CmoCh02G012520	3.39277	Peroxidase
BBT72VS00	CmoCh17G010130	3.39272	Multidrug resistance protein ABC transporter family protein, putative
BBT72VS00	CmoCh15G000480	3.38884	Unknown protein
BBT72VS00	CmoCh15G012260	3.38873	Protein of unknown function (DUF1442)
BBT72VS00	CmoCh03G012290	3.38465	Phenylalanine ammonia-lyase
BBT72VS00	CmoCh03G010550	3.38027	Unknown protein
BBT72VS00	CmoCh01G003900	3.37049	Glutamine synthetase
BBT72VS00	CmoCh08G003870	3.36713	Unknown protein
BBT72VS00	CmoCh11G020510	3.36611	Unknown protein
BBT72VS00	CmoCh11G007530	3.36241	Methylthioribose-1-phosphate isomerase
BBT72VS00	CmoCh04G022270	3.36084	MACPF domain-containing protein
BBT72VS00	CmoCh05G003550	3.35038	WRKY protein
BBT72VS00	CmoCh16G006300	3.34997	WRKY protein
BBT72VS00	CmoCh15G011620	3.34906	Unknown protein
BBT72VS00	CmoCh20G010760	3.34849	VQ domain-containing protein
BBT72VS00	CmoCh01G001900	3.34765	cinnamoyl coa reductase
BBT72VS00	CmoCh17G013120	3.34292	ethylene-responsive transcription factor ERF098-like
BBT72VS00	CmoCh04G012890	3.34168	Exocyst subunit Exo70 family protein
BBT72VS00	CmoCh16G008950	3.33622	2-iminobutanoate/2-iminopropanoate deaminase-like
BBT72VS00	CmoCh20G008570	3.33222	transcription factor HBI1-like isoform X1
BBT72VS00	CmoCh04G009910	3.32557	calmodulin-like
BBT72VS00	CmoCh04G017070	3.31861	protein NRT1/ PTR FAMILY 4.6-like
BBT72VS00	CmoCh20G000890	3.3157	Unknown protein
BBT72VS00	CmoCh06G014520	3.31016	Procollagen-proline 4-dioxygenase
BBT72VS00	CmoCh15G004730	3.30906	GATA transcription factor 8-like
BBT72VS00	CmoCh02G007270	3.30842	UDP-glycosyltransferase 87A2-like
BBT72VS00	CmoCh03G006470	3.30533	MLO-like protein
BBT72VS00	CmoCh14G018740	3.30483	protein NRT1/ PTR FAMILY 5.2-like
BBT72VS00	CmoCh20G006120	3.3006	Peroxidase
BBT72VS00	CmoCh01G016010	3.29682	Cryptochrome DASH
BBT72VS00	CmoCh11G017780	3.29102	Protein DETOXIFICATION
BBT72VS00	CmoCh03G003860	3.2888	mitochondrial uncoupling protein 1-like
BBT72VS00	CmoCh03G007990	3.28447	NAD(P)H dehydrogenase (quinone)
BBT72VS00	CmoCh16G004800	3.28412	ABC transporter-like protein
BBT72VS00	CmoCh04G003140	3.28407	IAA-amino acid hydrolase ILR1-like 1
BBT72VS00	CmoCh05G006070	3.28301	Unknown protein
BBT72VS00	CmoCh07G008050	3.28077	WAT1-related protein
BBT72VS00	CmoCh07G001670	3.27467	precursor of CEP14
BBT72VS00	CmoCh07G008590	3.2731	COPII coat assembly protein SEC16, putative
BBT72VS00	CmoCh06G009560	3.26958	NAC domain-containing protein 40-like
BBT72VS00	CmoCh19G003100	3.26956	Actin
BBT72VS00	CmoCh01G013690	3.2683	3-hydroxyisobutyryl-CoA hydrolase-like protein 5
BBT72VS00	CmoCh20G003380	3.26825	Non-specific serine/threonine protein kinase
BBT72VS00	CmoCh07G005550	3.26465	Phospho-2-dehydro-3-deoxyheptonate aldolase
BBT72VS00	CmoCh16G002510	3.26203	metacaspase-1-like
BBT72VS00	CmoCh06G015720	3.2569	Unknown protein
BBT72VS00	CmoCh03G012270	3.25607	Phenylalanine ammonia-lyase
BBT72VS00	CmoCh01G009170	3.25327	Protein disulfide isomerase (PDI)-like protein 3
BBT72VS00	CmoCh07G010570	3.25218	NAD(P)-linked oxidoreductase superfamily protein
BBT72VS00	CmoCh19G006520	3.24929	Transducin/WD40 repeat-like superfamily protein
BBT72VS00	CmoCh07G011690	3.24849	NADH--cytochrome b5 reductase 1-like
BBT72VS00	CmoCh15G011390	3.24405	cucumisin-like
BBT72VS00	CmoCh06G013340	3.24332	ethylene-responsive transcription factor 1B-like
BBT72VS00	CmoCh11G005850	3.24158	Unknown protein
BBT72VS00	CmoCh09G005530	3.24108	Glycosyltransferase
BBT72VS00	CmoCh16G004990	3.23833	Glutathione S-transferase
BBT72VS00	CmoCh15G002530	3.23525	TPX2 domain-containing protein
BBT72VS00	CmoCh07G008210	3.23394	Aminotran_5 domain-containing protein
BBT72VS00	CmoCh04G008990	3.23368	Protein DETOXIFICATION
BBT72VS00	CmoCh08G009620	3.23252	MLO-like protein
BBT72VS00	CmoCh13G011050	3.22935	Unknown protein
BBT72VS00	CmoCh17G009740	3.22298	tolB protein-related
BBT72VS00	CmoCh14G004100	3.22215	LOW QUALITY PROTEIN: uncharacterized protein LOC111024852
BBT72VS00	CmoCh02G001710	3.21697	Glutamate receptor
BBT72VS00	CmoCh11G000460	3.21592	Zn-dependent exopeptidases superfamily protein
BBT72VS00	CmoCh07G002860	3.21531	cysteine-rich receptor-like protein kinase 29
BBT72VS00	CmoCh17G000390	3.21177	Transketolase
BBT72VS00	CmoCh06G000220	3.21059	sigma factor binding protein 2, chloroplastic-like
BBT72VS00	CmoCh20G008120	3.21022	Arginine decarboxylase
BBT72VS00	CmoCh07G012710	3.20995	adenine/guanine permease AZG1-like
BBT72VS00	CmoCh01G018680	3.20625	Isoaspartyl peptidase/L-asparaginase
BBT72VS00	CmoCh12G001270	3.20587	Phospho-2-dehydro-3-deoxyheptonate aldolase
BBT72VS00	CmoCh12G001960	3.20484	Malic enzyme
BBT72VS00	CmoCh06G013400	3.20237	2-oxoglutarate (2OG) and Fe(II)-dependent oxygenase superfamily protein
BBT72VS00	CmoCh10G007000	3.19863	receptor-like protein kinase 5
BBT72VS00	CmoCh12G001790	3.19768	Protein DETOXIFICATION
BBT72VS00	CmoCh04G024030	3.19535	Plastid movement impaired 2
BBT72VS00	CmoCh19G011220	3.194	Protein kinase domain-containing protein
BBT72VS00	CmoCh20G000500	3.19307	Peroxidase
BBT72VS00	CmoCh18G005270	3.19169	BOI-related E3 ubiquitin-protein ligase 1-like
BBT72VS00	CmoCh01G004360	3.19141	2-hydroxyacyl-CoA lyase-like
BBT72VS00	CmoCh18G006310	3.19116	Protein of unknown function (DUF579)
BBT72VS00	CmoCh13G005420	3.19023	Unknown protein
BBT72VS00	CmoCh14G004020	3.18948	Dirigent protein
BBT72VS00	CmoCh04G030590	3.18802	Delta-1-pyrroline-5-carboxylate synthase
BBT72VS00	CmoCh12G001150	3.18723	Glycosyl hydrolase family protein
BBT72VS00	CmoCh02G005160	3.18159	cytochrome P450 81F3
BBT72VS00	CmoCh15G011630	3.18124	DUF1639 family protein
BBT72VS00	CmoCh18G003480	3.18095	Protein kinase domain-containing protein
BBT72VS00	CmoCh13G000080	3.17844	Methyltransferase-related protein, putative
BBT72VS00	CmoCh02G006450	3.17815	Glutathione transferase
BBT72VS00	CmoCh08G002360	3.1739	serine/threonine-protein kinase OXI1
BBT72VS00	CmoCh10G010720	3.17017	Protein kinase domain-containing protein
BBT72VS00	CmoCh17G012410	3.16927	RPM1-interacting protein 4-like
BBT72VS00	CmoCh13G007760	3.16215	5'-adenylylsulfate reductase 1
BBT72VS00	CmoCh17G009750	3.15943	Unknown protein
BBT72VS00	CmoCh14G007180	3.15867	TLC domain-containing protein
BBT72VS00	CmoCh14G015840	3.15792	1,4-dihydroxy-2-naphthoyl-CoA thioesterase 1-like
BBT72VS00	CmoCh16G010120	3.15693	Unknown protein
BBT72VS00	CmoCh14G017610	3.15547	protein CDC73 homolog
BBT72VS00	CmoCh15G015120	3.15379	Late embryogenesis abundant protein
BBT72VS00	CmoCh11G018990	3.15335	Aconitate hydratase
BBT72VS00	CmoCh01G014270	3.15056	nuclear receptor subfamily 4 group A member 3-like
BBT72VS00	CmoCh02G016220	3.14867	Protein kinase domain-containing protein
BBT72VS00	CmoCh12G006330	3.14507	Protein kinase domain-containing protein
BBT72VS00	CmoCh06G003110	3.14505	short-chain dehydrogenase TIC 32, chloroplastic-like
BBT72VS00	CmoCh16G006870	3.14251	Mitogen-activated protein kinase
BBT72VS00	CmoCh16G002710	3.14151	Ubiquinol oxidase
BBT72VS00	CmoCh16G010160	3.13851	Unknown protein
BBT72VS00	CmoCh04G029660	3.13736	Endo-1,3(4)-beta-glucanase
BBT72VS00	CmoCh14G016240	3.1338	Ubiquitin-conjugating enzyme E2 32
BBT72VS00	CmoCh04G007680	3.13212	WRKY protein
BBT72VS00	CmoCh04G021940	3.13065	extensin
BBT72VS00	CmoCh04G029570	3.12812	6-phosphogluconate dehydrogenase, decarboxylating
BBT72VS00	CmoCh13G004170	3.1243	Unknown protein
BBT72VS00	CmoCh20G003210	3.12332	transmembrane protein 56-B
BBT72VS00	CmoCh03G001700	3.1174	Mitochondrial fission 1 protein
BBT72VS00	CmoCh01G010340	3.11638	Alcohol dehydrogenase
BBT72VS00	CmoCh12G006140	3.11579	protein DELETION OF SUV3 SUPPRESSOR 1(I)-like
BBT72VS00	CmoCh13G007350	3.11544	cysteine-rich receptor-like protein kinase 10
BBT72VS00	CmoCh20G003000	3.11533	Filamentous hemagglutinin transporter
BBT72VS00	CmoCh06G007770	3.10915	protein NSP-INTERACTING KINASE 2-like
BBT72VS00	CmoCh15G006940	3.10625	Unknown protein
BBT72VS00	CmoCh04G021260	3.10612	Unknown protein
BBT72VS00	CmoCh05G006020	3.10361	early nodulin-93-like
BBT72VS00	CmoCh14G013280	3.10195	ABC transporter G family member 35-like
BBT72VS00	CmoCh02G018240	3.09927	calmodulin-like
BBT72VS00	CmoCh14G018390	3.09067	1-aminocyclopropane-1-carboxylate oxidase homolog 1-like
BBT72VS00	CmoCh07G000430	3.08963	UDP-arabinose 4-epimerase 1-like
BBT72VS00	CmoCh15G004140	3.08661	Glutamate dehydrogenase, NAD-specific
BBT72VS00	CmoCh17G007840	3.08441	Sulfate transporter, putative
BBT72VS00	CmoCh01G006570	3.08185	metal tolerance protein B-like
BBT72VS00	CmoCh07G008220	3.08028	AAA domain-containing protein
BBT72VS00	CmoCh12G005940	3.0798	WRKY domain-containing protein
BBT72VS00	CmoCh05G012860	3.07922	temperature-induced lipocalin-1-like
BBT72VS00	CmoCh20G008110	3.07836	Unknown protein
BBT72VS00	CmoCh00G001460	3.0777	Transmembrane protein, putative
BBT72VS00	CmoCh03G013980	3.07516	RING-H2 finger protein ATL3
BBT72VS00	CmoCh16G004060	3.07457	glutelin type-A 2-like
BBT72VS00	CmoCh11G003550	3.07423	plant intracellular Ras-group-related LRR protein 6-like
BBT72VS00	CmoCh07G008810	3.07314	Unknown protein
BBT72VS00	CmoCh11G020160	3.07294	Tyrosine-protein phosphatase
BBT72VS00	CmoCh14G000370	3.07239	probably inactive leucine-rich repeat receptor-like protein kinase IMK2
BBT72VS00	CmoCh09G005220	3.07174	Sarcosine oxidase
BBT72VS00	CmoCh15G009710	3.07137	zinc finger CCCH domain-containing protein 15-like
BBT72VS00	CmoCh11G018510	3.07105	rho GDP-dissociation inhibitor 1-like
BBT72VS00	CmoCh13G002780	3.07063	protein argonaute 5
BBT72VS00	CmoCh03G004640	3.06665	Ankyrin repeat-containing protein
BBT72VS00	CmoCh14G001340	3.06582	Haloacid dehalogenase-like hydrolase (HAD) superfamily protein
BBT72VS00	CmoCh20G009160	3.06186	transcription factor MYB41-like
BBT72VS00	CmoCh06G015620	3.06147	calmodulin
BBT72VS00	CmoCh02G011630	3.06059	dof zinc finger protein 1-like
BBT72VS00	CmoCh05G006250	3.05344	Ubiquitin-conjugating enzyme E2
BBT72VS00	CmoCh18G000280	3.04997	Phospholipid-transporting ATPase
BBT72VS00	CmoCh01G017050	3.04941	stromal cell-derived factor 2-like protein
BBT72VS00	CmoCh09G000500	3.04463	Unknown protein
BBT72VS00	CmoCh02G009150	3.04401	Endoglucanase
BBT72VS00	CmoCh05G007950	3.04092	Unknown protein
BBT72VS00	CmoCh12G005200	3.03901	Leucine-rich receptor-like protein kinase family protein
BBT72VS00	CmoCh13G001470	3.03893	phenolic glucoside malonyltransferase 1-like
BBT72VS00	CmoCh12G011730	3.03866	CBL-interacting serine/threonine-protein kinase 6
BBT72VS00	CmoCh01G011770	3.03826	Protein of unknown function, DUF584
BBT72VS00	CmoCh07G009110	3.03677	Exostosin family protein
BBT72VS00	CmoCh08G006870	3.03452	Ankyrin repeat-containing protein
BBT72VS00	CmoCh07G007390	3.03308	Unknown protein
BBT72VS00	CmoCh04G007710	3.03295	1-aminocyclopropane-1-carboxylate synthase
BBT72VS00	CmoCh17G006930	3.02722	beta-fructofuranosidase, insoluble isoenzyme CWINV1-like
BBT72VS00	CmoCh08G010030	3.02567	vesicle-associated membrane protein 722-like
BBT72VS00	CmoCh08G003710	3.02457	Histone H2A
BBT72VS00	CmoCh15G015220	3.02194	Unknown protein
BBT72VS00	CmoCh06G017080	3.02165	Transaldolase
BBT72VS00	CmoCh18G005330	3.02083	protein PHLOEM PROTEIN 2-LIKE A9-like
BBT72VS00	CmoCh10G004630	3.019	transcription factor IBH1-like 1
BBT72VS00	CmoCh17G013370	3.01853	Glutathione gamma-glutamylcysteinyltransferase
BBT72VS00	CmoCh14G002370	3.01752	sporulation-specific protein 15-like isoform X1
BBT72VS00	CmoCh16G002130	3.01726	Unknown protein
BBT72VS00	CmoCh11G017850	3.01703	Protein kinase domain-containing protein
BBT72VS00	CmoCh03G006980	3.01535	protein POLLENLESS 3-LIKE 2-like
BBT72VS00	CmoCh16G000880	3.01375	hevamine-A-like
BBT72VS00	CmoCh07G006420	3.01372	Phytosulfokine-beta
BBT72VS00	CmoCh04G021930	3.00994	leucine-rich repeat extensin-like protein 1
BBT72VS00	CmoCh04G025530	3.00916	Unknown protein
BBT72VS00	CmoCh16G012790	3.0069	Unknown protein
BBT72VS00	CmoCh01G020640	3.00525	Arabidopsis protein of unknown function (DUF241)
BBT72VS00	CmoCh08G007730	3.00264	Lipoxygenase
BBT72VS00	CmoCh09G000270	3.00027	short-chain dehydrogenase/reductase family 42E member 1-like
BBT120VS00	CmoCh17G013750	-9.09683	protein LAZY 1-like
BBT120VS00	CmoCh02G017500	-9.04406	Flavin-containing monooxygenase
BBT120VS00	CmoCh12G004180	-8.39224	zinc-finger homeodomain protein 2-like
BBT120VS00	CmoCh14G007420	-7.7552	protein LAZY 1-like
[truncated: 2,379 more rows]

## Sheet: 394-1-27-12 DEGs
Supplementary Table S2: Differentially expressed genes in 394-1-27-12 (here coded as SS30)
SS30120VS00	CmoCh16G007900	-13.3027	Xyloglucan endotransglucosylase/hydrolase
SS3012VS00	CmoCh01G006110	-10.3483	GTP cyclohydrolase II
SS30120VS00	CmoCh12G009000	-10.2757	transcription factor bHLH146-like
SS30120VS00	CmoCh17G004740	-9.63781	U3 small nucleolar RNA-associated protein 14 homolog A
SS3012VS00	CmoCh14G005040	-9.59499	cytochrome P450 94A1-like
SS3012VS00	CmoCh18G012610	-9.4533	Unknown protein
SS3072VS00	CmoCh10G009930	-9.03281	Beta-glucosidase
SS30120VS00	CmoCh06G007980	-8.98242	Encodes a root meristem growth factor (RGF). Belongs to a family of functionally redundant homologous peptides that are secreted, tyrosine-sulfated, and expressed mainly in the stem cell area and the innermost layer of central columella cells. RGFs are required for maintenance of the root stem cell niche and transit amplifying cell proliferation. Members of this family include: (RGF1), (RGF2), (R…
SS3012VS00	CmoCh06G007920	-8.71579	Bifunctional inhibitor/lipid-transfer protein/seed storage 2S albumin superfamily protein
SS3012VS00	CmoCh04G024050	-8.59226	Unknown protein
SS30120VS00	CmoCh05G007320	-8.56704	transcription factor bHLH146-like
SS3012VS00	CmoCh07G007230	-8.55416	ethylene-responsive transcription factor ERF109-like
SS30120VS00	CmoCh08G002460	-8.38841	EPIDERMAL PATTERNING FACTOR-like protein 9
SS3012VS00	CmoCh18G012390	-8.36745	ethylene-responsive transcription factor ERF027-like
SS3012VS00	CmoCh16G003830	-8.30918	ethylene-responsive transcription factor ERF109-like
SS3012VS00	CmoCh04G031510	-8.13901	ethylene-responsive transcription factor ERF020-like
SS30120VS00	CmoCh15G011980	-8.00011	14 kDa proline-rich protein DC2.15-like
SS3012VS00	CmoCh04G010110	-8.00002	Thiamine thiazole synthase, chloroplastic
SS3012VS00	CmoCh11G011030	-7.93839	cytochrome P450 84A1-like
SS3012VS00	CmoCh15G012640	-7.92639	Protein DETOXIFICATION
SS3012VS00	CmoCh04G006660	-7.90953	Tify domain-containing protein
SS30120VS00	CmoCh04G009090	-7.88469	Xyloglucan endotransglucosylase/hydrolase
SS3072VS00	CmoCh17G009920	-7.83386	Pectinesterase
SS3012VS00	CmoCh17G001180	-7.79387	9-cis-epoxycarotenoid dioxygenase NCED6, chloroplastic
SS3012VS00	CmoCh08G001940	-7.61003	Peroxidase
SS3072VS00	CmoCh11G011030	-7.60977	cytochrome P450 84A1-like
SS3072VS00	CmoCh18G006750	-7.609	Pollen Ole e 1 allergen and extensin family protein
SS3012VS00	CmoCh02G010610	-7.59646	dehydration-responsive element-binding protein 1E-like
SS30120VS00	CmoCh11G011030	-7.58892	cytochrome P450 84A1-like
SS30120VS00	CmoCh18G006750	-7.58608	Pollen Ole e 1 allergen and extensin family protein
SS30120VS00	CmoCh04G009080	-7.58578	Xyloglucan endotransglucosylase/hydrolase
SS30120VS00	CmoCh10G003360	-7.55045	Stress up-regulated Nod 19 protein
SS3012VS00	CmoCh10G000360	-7.46719	Bidirectional sugar transporter SWEET
SS3072VS00	CmoCh17G001180	-7.46224	9-cis-epoxycarotenoid dioxygenase NCED6, chloroplastic
SS3012VS00	CmoCh16G001400	-7.31781	C5a peptidase
SS3012VS00	CmoCh15G014500	-7.28248	Photolyase/cryptochrome alpha/beta domain-containing protein
SS3012VS00	CmoCh15G012620	-7.2427	ethylene-responsive transcription factor ERF027-like
SS30120VS00	CmoCh04G003040	-7.23999	WAT1-related protein
SS3072VS00	CmoCh11G020300	-7.22018	Unknown protein
SS3012VS00	CmoCh18G000570	-7.19947	C2 domain-containing protein
SS3012VS00	CmoCh11G014250	-7.17094	Angiogenin-2 like
SS3012VS00	CmoCh12G004830	-7.1189	calmodulin-like
SS3012VS00	CmoCh13G007900	-7.09191	High-affinity nitrate transporter
SS3012VS00	CmoCh19G007780	-7.07586	O-methyltransferase family protein
SS3012VS00	CmoCh13G005790	-7.0186	Unknown protein
SS30120VS00	CmoCh09G011780	-7.00894	keratin, type I cytoskeletal 9-like
SS3012VS00	CmoCh01G005900	-7.00321	3-ketoacyl-CoA synthase
SS3012VS00	CmoCh20G006350	-6.95999	Unknown protein
SS30120VS00	CmoCh20G007920	-6.9533	auxin-responsive protein SAUR24-like
SS30120VS00	CmoCh01G001260	-6.93488	Auxin-responsive protein
SS3012VS00	CmoCh01G019180	-6.91017	Unknown protein
SS3012VS00	CmoCh13G005560	-6.8948	protein TIFY 5A-like
SS3012VS00	CmoCh05G011400	-6.87622	acetylajmalan esterase-like
SS3072VS00	CmoCh20G007890	-6.84448	auxin-responsive protein SAUR21-like
SS30120VS00	CmoCh01G001580	-6.83833	palmitoyl-monogalactosyldiacylglycerol delta-7 desaturase, chloroplastic-like
SS3012VS00	CmoCh11G004310	-6.82605	tetraspanin-15-like
SS30120VS00	CmoCh11G014250	-6.82358	Angiogenin-2 like
SS3072VS00	CmoCh15G011500	-6.78387	Auxin-responsive protein
SS3072VS00	CmoCh04G017360	-6.77366	amino acid transporter AVT1I-like
SS3012VS00	CmoCh16G001580	-6.75685	dehydration-responsive element-binding protein 1A-like
SS30120VS00	CmoCh13G007900	-6.74408	High-affinity nitrate transporter
SS3012VS00	CmoCh17G007400	-6.70048	actin-related protein 8-like
SS3012VS00	CmoCh05G007570	-6.65895	F-box protein At3g62230-like
SS3012VS00	CmoCh13G004620	-6.65433	protein PHLOEM PROTEIN 2-LIKE A9
SS30120VS00	CmoCh04G016540	-6.62977	transcription factor PAR1-like
SS3012VS00	CmoCh04G005340	-6.60364	ethylene-responsive transcription factor ERF109-like
SS3072VS00	CmoCh09G002880	-6.60261	Unknown protein
SS3012VS00	CmoCh12G008740	-6.58569	BZIP transcription factor family protein
SS3012VS00	CmoCh12G000350	-6.53543	HXXXD-type acyl-transferase family protein
SS30120VS00	CmoCh12G006270	-6.53309	NAC domain-containing protein
SS30120VS00	CmoCh04G017240	-6.4926	transcription factor PRE6-like
SS3072VS00	CmoCh10G007640	-6.48234	serine/threonine-protein kinase tricorner-like
SS3072VS00	CmoCh14G007870	-6.43234	chalcone synthase-like
SS30120VS00	CmoCh05G003000	-6.35259	auxin-responsive protein SAUR50-like
SS3072VS00	CmoCh19G008080	-6.33714	Arabidopsis protein of unknown function (DUF241)
SS30120VS00	CmoCh10G009930	-6.25611	Beta-glucosidase
SS30120VS00	CmoCh01G003780	-6.24152	MLP-like protein 34
SS3012VS00	CmoCh01G008960	-6.23315	ethylene-responsive transcription factor ERF022-like
SS3012VS00	CmoCh05G001600	-6.23027	Unknown protein
SS3024VS00	CmoCh11G014250	-6.1946	Angiogenin-2 like
SS3012VS00	CmoCh18G012620	-6.18152	3-hexulose-6-phosphate isomerase
SS3012VS00	CmoCh11G005800	-6.18033	protein NRT1/ PTR FAMILY 6.2-like
SS3072VS00	CmoCh05G007320	-6.18014	transcription factor bHLH146-like
SS3012VS00	CmoCh04G000560	-6.11281	Phosphomannomutase/phosphoglucomutase
SS3012VS00	CmoCh18G006750	-6.08713	Pollen Ole e 1 allergen and extensin family protein
SS3012VS00	CmoCh04G025760	-6.07901	Unknown protein
SS30120VS00	CmoCh17G013750	-6.07584	protein LAZY 1-like
SS3012VS00	CmoCh13G011830	-6.0604	glutathione S-transferase U9-like
SS3012VS00	CmoCh17G002820	-6.04808	sugar transporter ERD6-like 16
SS3012VS00	CmoCh10G000050	-6.02284	carbonyl reductase [NADPH] 1-like
SS3012VS00	CmoCh10G009950	-5.99686	beta-glucosidase 24-like
SS3012VS00	CmoCh16G001910	-5.97814	NAD(P)-binding Rossmann-fold superfamily protein
SS3072VS00	CmoCh20G011340	-5.9246	Root meristem growth factor 9-like protein
SS30120VS00	CmoCh16G003830	-5.88936	ethylene-responsive transcription factor ERF109-like
SS3072VS00	CmoCh04G003040	-5.8467	WAT1-related protein
SS3012VS00	CmoCh13G000300	-5.81898	zinc finger protein CONSTANS-LIKE 6
SS3072VS00	CmoCh10G009920	-5.81329	beta-glucosidase 12-like
SS30120VS00	CmoCh02G009520	-5.79274	Unknown protein
SS3012VS00	CmoCh07G003850	-5.77483	endochitinase-like
SS3012VS00	CmoCh19G010950	-5.76215	Xyloglucan endotransglucosylase/hydrolase
SS3012VS00	CmoCh04G014420	-5.75393	plasma membrane intrinsic protein 2
SS30120VS00	CmoCh08G010880	-5.67046	Auxin-responsive protein
SS30120VS00	CmoCh20G007870	-5.63832	auxin-responsive protein SAUR24-like
SS3012VS00	CmoCh06G001830	-5.62266	50S ribosomal protein L35
SS3012VS00	CmoCh04G003040	-5.5809	WAT1-related protein
SS3012VS00	CmoCh04G025770	-5.55011	protein GIGANTEA-like
SS3072VS00	CmoCh12G009550	-5.54815	Auxin efflux carrier component
SS30120VS00	CmoCh08G003030	-5.53323	Auxin-responsive protein
SS3072VS00	CmoCh17G000020	-5.53059	gibberellin 20 oxidase 2-like
SS3012VS00	CmoCh04G011030	-5.52945	adagio protein 3-like
SS30120VS00	CmoCh11G015940	-5.52061	glutaredoxin-C1-like
SS3012VS00	CmoCh01G019880	-5.51713	jasmonate O-methyltransferase-like
SS30120VS00	CmoCh18G012390	-5.51406	ethylene-responsive transcription factor ERF027-like
SS30120VS00	CmoCh07G002680	-5.49192	VID27-like protein
SS30120VS00	CmoCh19G001500	-5.48344	Flavin-containing monooxygenase
SS3012VS00	CmoCh15G012600	-5.47793	Unknown protein
SS3072VS00	CmoCh08G001620	-5.47747	probably inactive receptor-like protein kinase At2g46850
SS30120VS00	CmoCh17G011580	-5.46507	Plant protein of unknown function (DUF868)
SS3072VS00	CmoCh20G007740	-5.46037	pentatricopeptide repeat-containing protein MRL1, chloroplastic-like
SS3072VS00	CmoCh05G009430	-5.45696	Terpene cyclase/mutase family member
SS3012VS00	CmoCh16G010510	-5.43235	ethylene-responsive transcription factor ERF027-like
SS3012VS00	CmoCh17G010220	-5.42827	DUF761 domain-containing protein
SS30120VS00	CmoCh07G007230	-5.42119	ethylene-responsive transcription factor ERF109-like
SS30120VS00	CmoCh08G009430	-5.4176	Very-long-chain aldehyde decarbonylase GL1-1
SS3012VS00	CmoCh08G007980	-5.41635	Unknown protein
SS3072VS00	CmoCh11G004090	-5.39854	transcription factor MYB36-like
SS3012VS00	CmoCh20G000660	-5.38831	Lipoxygenase
SS3012VS00	CmoCh08G007990	-5.38286	FLZ-type domain-containing protein
SS3072VS00	CmoCh06G007280	-5.3671	ethylene-responsive transcription factor ERF026-like
SS3012VS00	CmoCh15G012670	-5.35412	protein IQ-DOMAIN 31-like
SS30120VS00	CmoCh03G011930	-5.33865	Expansin
SS3012VS00	CmoCh03G003320	-5.33667	macrophage migration inhibitory factor homolog
SS3072VS00	CmoCh16G007900	-5.3309	Xyloglucan endotransglucosylase/hydrolase
SS3012VS00	CmoCh11G013660	-5.29174	Cold regulated protein 27, putative isoform 2
SS3012VS00	CmoCh04G022280	-5.27191	vacuolar iron transporter 1-like
SS30120VS00	CmoCh14G014250	-5.27003	ethylene-responsive transcription factor LEP-like
SS3012VS00	CmoCh16G005530	-5.25987	abscisic acid 8'-hydroxylase 1-like
SS3012VS00	CmoCh10G009890	-5.25065	lysine-specific demethylase JMJ30-like isoform X1
SS3012VS00	CmoCh18G003000	-5.23365	sulfite exporter TauE/SafE family protein 5-like
SS3012VS00	CmoCh13G003170	-5.2141	Cytochrome p450
SS3072VS00	CmoCh05G009420	-5.21032	Terpene cyclase/mutase family member
SS3012VS00	CmoCh05G001620	-5.20858	Unknown protein
SS3012VS00	CmoCh01G019980	-5.19405	Thioredoxin
SS3012VS00	CmoCh11G018630	-5.18483	Unknown protein
SS30120VS00	CmoCh18G002610	-5.18419	ankyrin repeat-containing protein ITN1-like
SS3012VS00	CmoCh19G010930	-5.16541	Xyloglucan endotransglucosylase/hydrolase
SS3072VS00	CmoCh19G011190	-5.16066	zinc finger protein CONSTANS-LIKE 5-like
SS3012VS00	CmoCh11G019630	-5.15806	transcription factor bHLH162-like
SS3012VS00	CmoCh17G007890	-5.15273	thionin-like protein 2
SS30120VS00	CmoCh11G000340	-5.12342	protein indeterminate-domain 16
SS3012VS00	CmoCh04G020360	-5.11813	calmodulin-like
SS3072VS00	CmoCh07G013000	-5.11279	transcription factor ORG2-like
SS3012VS00	CmoCh06G007280	-5.10278	ethylene-responsive transcription factor ERF026-like
SS3012VS00	CmoCh05G011000	-5.09838	dnaJ homolog subfamily B member 8-like
SS3024VS00	CmoCh18G006750	-5.07997	Pollen Ole e 1 allergen and extensin family protein
SS3012VS00	CmoCh03G000790	-5.07698	polygalacturonase inhibitor-like
SS3012VS00	CmoCh08G004000	-5.05116	Potassium transporter
SS3072VS00	CmoCh02G002310	-5.03084	zinc finger CCCH domain-containing protein 18-like
SS3072VS00	CmoCh10G009300	-5.02581	Unknown protein
SS3012VS00	CmoCh19G010960	-5.01496	Unknown protein
SS3012VS00	CmoCh17G007270	-5.01443	Profilin
SS3012VS00	CmoCh20G001750	-4.9745	F-box protein At2g27310
SS3012VS00	CmoCh06G009850	-4.97138	Late cornified envelope protein 1E
SS30120VS00	CmoCh06G016650	-4.97039	protein LAZY 1-like
SS3072VS00	CmoCh16G003830	-4.95886	ethylene-responsive transcription factor ERF109-like
SS3072VS00	CmoCh09G011780	-4.95002	keratin, type I cytoskeletal 9-like
SS30120VS00	CmoCh17G011060	-4.93018	Flavin-containing monooxygenase
SS30120VS00	CmoCh06G007280	-4.92396	ethylene-responsive transcription factor ERF026-like
SS30120VS00	CmoCh17G011070	-4.92238	classical arabinogalactan protein 26
SS3012VS00	CmoCh11G011070	-4.92107	B-box zinc finger family protein
SS3012VS00	CmoCh03G008720	-4.91533	Integrase catalytic domain-containing protein
SS3072VS00	CmoCh15G002740	-4.91483	Expansin
SS3012VS00	CmoCh11G013590	-4.90418	Ethylene-responsive transcription factor
SS3072VS00	CmoCh14G003710	-4.89449	Glutaredoxin domain-containing protein
SS3072VS00	CmoCh19G010800	-4.88491	GDSL esterase/lipase
SS30120VS00	CmoCh20G007900	-4.8804	auxin-responsive protein SAUR24-like
SS3012VS00	CmoCh04G000510	-4.87671	chaperone protein DnaJ-like isoform X1
SS3012VS00	CmoCh01G019860	-4.87087	jasmonate O-methyltransferase-like
SS3072VS00	CmoCh13G005070	-4.86761	FAD-binding Berberine family protein
SS3012VS00	CmoCh14G006560	-4.8668	Bidirectional sugar transporter SWEET
SS3012VS00	CmoCh09G002130	-4.86069	EF hand calcium-binding protein family
SS3012VS00	CmoCh11G007230	-4.86052	DDE Tnp4 domain-containing protein
SS3012VS00	CmoCh14G002940	-4.85378	PEBP (phosphatidylethanolamine-binding protein) family protein
SS3012VS00	CmoCh13G005600	-4.83093	protein TIFY 5A-like
SS3072VS00	CmoCh05G002550	-4.82972	protein RADIALIS-like 4
SS3072VS00	CmoCh08G009430	-4.8109	Very-long-chain aldehyde decarbonylase GL1-1
SS30120VS00	CmoCh08G001950	-4.80991	protein SHORT-ROOT-like
SS30120VS00	CmoCh16G010510	-4.7962	ethylene-responsive transcription factor ERF027-like
SS3072VS00	CmoCh07G011150	-4.79187	josephin-like protein
SS3012VS00	CmoCh14G009340	-4.78729	bifunctional epoxide hydrolase 2-like
SS3072VS00	CmoCh11G017140	-4.78303	auxin-induced protein X15-like
SS3072VS00	CmoCh20G007800	-4.77078	auxin-responsive protein SAUR21-like
SS30120VS00	CmoCh04G010690	-4.76692	CLAVATA3/ESR-RELATED 16
SS3012VS00	CmoCh02G016080	-4.757	ethylene-responsive transcription factor 1A-like
SS3072VS00	CmoCh14G005960	-4.74155	aquaporin NIP2-1-like
SS3012VS00	CmoCh02G008320	-4.71559	zinc finger protein ZAT11-like
SS3072VS00	CmoCh01G019180	-4.6935	Unknown protein
SS3012VS00	CmoCh11G015940	-4.67885	glutaredoxin-C1-like
SS30120VS00	CmoCh19G000860	-4.66565	transcriptional regulator TAC1-like
SS3072VS00	CmoCh14G002530	-4.66203	Cytochrome P450
SS30120VS00	CmoCh04G007530	-4.6524	ethylene-responsive transcription factor CRF2-like
SS30120VS00	CmoCh05G009430	-4.63949	Terpene cyclase/mutase family member
SS3012VS00	CmoCh15G014490	-4.63176	Unknown protein
SS3012VS00	CmoCh17G007330	-4.61711	Histidine phosphotransfer protein
SS3012VS00	CmoCh04G015120	-4.6144	cucumisin-like
SS3012VS00	CmoCh09G011770	-4.61171	Unknown protein
SS3072VS00	CmoCh05G009440	-4.6016	Terpene cyclase/mutase family member
SS3012VS00	CmoCh08G010780	-4.59919	transcription factor bHLH92-like
SS3012VS00	CmoCh04G018370	-4.59278	Unknown protein
SS3012VS00	CmoCh14G013750	-4.59035	protein LURP-one-related 5-like
SS30120VS00	CmoCh16G002160	-4.57252	NADPH-dependent aldo-keto reductase, chloroplastic
SS30120VS00	CmoCh11G020190	-4.55642	GDSL esterase/lipase
SS30120VS00	CmoCh12G009550	-4.52586	Auxin efflux carrier component
SS3012VS00	CmoCh19G009760	-4.52269	Actin cytoskeleton-regulatory complex protein
SS3072VS00	CmoCh09G001500	-4.52117	protein RADIALIS-like 3
SS3072VS00	CmoCh04G024560	-4.50424	flavonol synthase/flavanone 3-hydroxylase-like
SS3012VS00	CmoCh09G007950	-4.49267	ethylene-responsive transcription factor ERF014-like
SS3072VS00	CmoCh13G008460	-4.48677	squamosa promoter-binding-like protein 13A
SS3012VS00	CmoCh11G004130	-4.48576	1-deoxy-D-xylulose-5-phosphate synthase
SS3012VS00	CmoCh14G010720	-4.47654	Non-specific serine/threonine protein kinase
SS3012VS00	CmoCh05G003000	-4.47002	auxin-responsive protein SAUR50-like
SS3072VS00	CmoCh17G011060	-4.46418	Flavin-containing monooxygenase
SS3012VS00	CmoCh01G001370	-4.4571	acyl-protein thioesterase 2-like
SS3072VS00	CmoCh17G011070	-4.45629	classical arabinogalactan protein 26
SS3012VS00	CmoCh01G008340	-4.41341	Chlorophyll a-b binding protein, chloroplastic
SS3012VS00	CmoCh02G002010	-4.41325	glutaredoxin-C9-like
SS3072VS00	CmoCh07G007290	-4.41291	tRNA Delta(2)-isopentenylpyrophosphate transferase, putative
SS30120VS00	CmoCh02G003530	-4.40444	auxin-responsive protein SAUR21-like
SS3012VS00	CmoCh07G004420	-4.40127	cytochrome P450 84A1
SS30120VS00	CmoCh17G001860	-4.38161	Auxin-responsive protein
SS3072VS00	CmoCh01G001580	-4.37702	palmitoyl-monogalactosyldiacylglycerol delta-7 desaturase, chloroplastic-like
SS30120VS00	CmoCh17G011940	-4.37636	Auxin-responsive protein
SS3012VS00	CmoCh20G000670	-4.34175	Lipoxygenase
SS3012VS00	CmoCh13G007610	-4.33882	15.4 kDa class V heat shock protein
SS3012VS00	CmoCh10G007630	-4.32236	DDE Tnp4 domain-containing protein
SS3012VS00	CmoCh18G013470	-4.31913	oligopeptide transporter 6
SS30120VS00	CmoCh14G008560	-4.29118	kirola-like
SS30120VS00	CmoCh12G003450	-4.28673	Peroxidase
SS30120VS00	CmoCh14G019990	-4.27548	protein ECERIFERUM 1-like
SS3012VS00	CmoCh15G008640	-4.27116	Transglut_core2 domain-containing protein
SS3072VS00	CmoCh08G010880	-4.26942	Auxin-responsive protein
SS3012VS00	CmoCh04G001390	-4.26081	RING-type E3 ubiquitin transferase
SS3072VS00	CmoCh12G004170	-4.26007	protein RADIALIS-like 4
SS3012VS00	CmoCh01G017010	-4.25871	zinc finger protein 3-like
SS30120VS00	CmoCh02G003420	-4.25849	auxin-responsive protein SAUR21-like
SS3072VS00	CmoCh17G001860	-4.25763	Auxin-responsive protein
SS3012VS00	CmoCh07G010520	-4.25562	Avr9/Cf-9 rapidly elicited protein
SS30120VS00	CmoCh05G009560	-4.21855	transcription factor PRE6-like
SS3012VS00	CmoCh19G009770	-4.2105	fasciclin-like arabinogalactan protein 21
SS3012VS00	CmoCh17G007880	-4.19856	thionin-like protein 2
SS3072VS00	CmoCh17G013750	-4.19733	protein LAZY 1-like
SS3012VS00	CmoCh09G001270	-4.1911	thioredoxin H1-like
SS3012VS00	CmoCh05G011250	-4.18645	Lipoxygenase
SS3012VS00	CmoCh05G009440	-4.17627	Terpene cyclase/mutase family member
SS3012VS00	CmoCh14G008670	-4.17506	Cold-regulated protein
SS3072VS00	CmoCh15G002940	-4.16953	Transcription factor protein
SS3012VS00	CmoCh13G005070	-4.16248	FAD-binding Berberine family protein
SS3012VS00	CmoCh20G007080	-4.15633	amino acid transporter AVT3B-like
SS30120VS00	CmoCh20G007930	-4.1551	auxin-responsive protein SAUR21-like
SS3012VS00	CmoCh01G001360	-4.15174	Unknown protein
SS3012VS00	CmoCh15G014480	-4.15146	Photolyase/cryptochrome alpha/beta domain-containing protein
SS3072VS00	CmoCh18G006320	-4.14299	non-specific lipid transfer protein GPI-anchored 1-like
SS3012VS00	CmoCh01G020360	-4.14142	Pathogenesis-related thaumatin superfamily protein
SS30120VS00	CmoCh07G001490	-4.13776	GDSL esterase/lipase
SS30120VS00	CmoCh04G027020	-4.13679	tyrosine-specific transport protein 1-like isoform X1
SS3012VS00	CmoCh18G003670	-4.1243	ethylene-responsive transcription factor 11-like
SS3012VS00	CmoCh11G019010	-4.12132	Protein DETOXIFICATION
SS3012VS00	CmoCh11G007400	-4.12031	Germin-like protein
SS3012VS00	CmoCh19G010940	-4.10901	Xyloglucan endotransglucosylase/hydrolase
SS3024VS00	CmoCh15G012670	-4.10447	protein IQ-DOMAIN 31-like
SS3012VS00	CmoCh01G003780	-4.10078	MLP-like protein 34
SS3012VS00	CmoCh10G009930	-4.09506	Beta-glucosidase
SS3012VS00	CmoCh04G011860	-4.08908	Elf4 domain-containing protein
SS30120VS00	CmoCh04G006990	-4.08755	gibberellin 2-beta-dioxygenase 1-like
SS30120VS00	CmoCh11G017140	-4.0829	auxin-induced protein X15-like
SS3012VS00	CmoCh19G007820	-4.08132	L-ascorbate oxidase homolog
SS30120VS00	CmoCh07G007290	-4.0812	tRNA Delta(2)-isopentenylpyrophosphate transferase, putative
SS3012VS00	CmoCh04G005530	-4.06106	basic blue protein-like
SS30120VS00	CmoCh01G001250	-4.05497	Auxin-responsive protein
SS3072VS00	CmoCh06G005000	-4.05243	B3 domain-containing protein At5g06250-like
SS30120VS00	CmoCh18G011810	-4.04707	protein PHYTOCHROME KINASE SUBSTRATE 1-like
SS3012VS00	CmoCh07G001010	-4.04025	protein TIFY 5A-like
SS3012VS00	CmoCh15G005830	-4.03607	protein GIGANTEA-like
SS3072VS00	CmoCh14G017230	-4.02776	basic 7S globulin-like
SS3072VS00	CmoCh01G001250	-4.02499	Auxin-responsive protein
SS3012VS00	CmoCh03G009080	-4.01919	transcription factor bHLH19-like
SS3012VS00	CmoCh08G009220	-4.01534	Unknown protein
SS30120VS00	CmoCh04G031540	-4.01215	GDSL esterase/lipase
SS3012VS00	CmoCh01G011900	-4.00388	Lipocln_cytosolic_FA-bd_dom domain-containing protein
SS3012VS00	CmoCh01G002430	-3.99408	RNA/RNP complex-1-interacting phosphatase, putative
SS3072VS00	CmoCh04G029000	-3.99307	early nodulin-75-like
SS3012VS00	CmoCh12G010540	-3.99039	dnaJ homolog subfamily B member 8
SS30120VS00	CmoCh02G003410	-3.97649	auxin-responsive protein SAUR21-like
SS3012VS00	CmoCh19G009400	-3.97608	S-type anion channel SLAH1-like
SS3012VS00	CmoCh01G016580	-3.97549	protein EXORDIUM-like 1
SS3024VS00	CmoCh18G012610	-3.97547	Unknown protein
SS30120VS00	CmoCh03G002750	-3.97049	protein SCARECROW-like
SS3072VS00	CmoCh10G005920	-3.96838	protein NRT1/ PTR FAMILY 6.2-like
SS30120VS00	CmoCh20G007620	-3.96037	Protodermal factor 1
SS30120VS00	CmoCh15G000320	-3.95933	Mitochondrial transcription termination factor family protein isoform 2
SS3012VS00	CmoCh11G001730	-3.95299	Expansin
SS30120VS00	CmoCh11G001610	-3.94662	myb-related protein 306-like
SS3072VS00	CmoCh11G014250	-3.94586	Angiogenin-2 like
SS30120VS00	CmoCh15G002740	-3.92675	Expansin
SS3072VS00	CmoCh04G005340	-3.92058	ethylene-responsive transcription factor ERF109-like
SS3012VS00	CmoCh17G001760	-3.91012	transcription factor bHLH92
SS30120VS00	CmoCh07G001480	-3.8984	Subtilisin-like protease
SS3012VS00	CmoCh11G017620	-3.89127	O-methyltransferase
SS3072VS00	CmoCh18G002670	-3.88994	Glyoxalase I
SS3072VS00	CmoCh04G006660	-3.87336	Tify domain-containing protein
SS30120VS00	CmoCh20G006350	-3.86451	Unknown protein
SS3072VS00	CmoCh02G003420	-3.86135	auxin-responsive protein SAUR21-like
SS3072VS00	CmoCh05G003000	-3.85325	auxin-responsive protein SAUR50-like
SS3012VS00	CmoCh12G011130	-3.84541	coiled-coil domain-containing protein SCD2 isoform X1
SS30120VS00	CmoCh14G007420	-3.84162	protein LAZY 1-like
SS3012VS00	CmoCh13G003780	-3.83266	NAD(P)-binding Rossmann-fold superfamily protein
SS3012VS00	CmoCh15G002430	-3.83107	malonyl-CoA:anthocyanidin 5-O-glucoside-6''-O-malonyltransferase-like
SS3012VS00	CmoCh01G020370	-3.82814	thaumatin-like protein 1
SS3012VS00	CmoCh04G021540	-3.82151	Regulator of Vps4 activity in the MVB pathway protein
SS3012VS00	CmoCh10G008090	-3.81946	protein TIFY 10a-like
SS3012VS00	CmoCh05G004170	-3.81933	HCO3- transporter family
SS3072VS00	CmoCh02G003440	-3.81873	auxin-responsive protein SAUR21-like
SS30120VS00	CmoCh15G011500	-3.81315	Auxin-responsive protein
SS3072VS00	CmoCh17G002590	-3.80651	adenylate isopentenyltransferase 5, chloroplastic-like
SS30120VS00	CmoCh18G006320	-3.80388	non-specific lipid transfer protein GPI-anchored 1-like
SS3012VS00	CmoCh20G006540	-3.80139	Glutaredoxin
SS3072VS00	CmoCh13G009040	-3.80136	Unknown protein
SS3012VS00	CmoCh13G001240	-3.78551	(1->3)-beta-glucan endohydrolase
SS3012VS00	CmoCh09G012450	-3.78068	Ethylene-responsive transcription factor
SS3072VS00	CmoCh09G006280	-3.77677	WW domain-containing protein
SS30120VS00	CmoCh15G011970	-3.77504	14 kDa proline-rich protein DC2.15-like
SS30120VS00	CmoCh07G011150	-3.76845	josephin-like protein
SS3012VS00	CmoCh17G006430	-3.76795	Auxin responsive SAUR protein
SS3012VS00	CmoCh12G008890	-3.76748	Auxin-responsive protein
SS3012VS00	CmoCh03G000640	-3.76647	Protein of unknown function, DUF642
SS3012VS00	CmoCh15G012860	-3.76493	Glutathione peroxidase
SS3072VS00	CmoCh12G012560	-3.76447	GDP-mannose transporter GONST4
SS3012VS00	CmoCh10G009300	-3.7631	Unknown protein
SS3012VS00	CmoCh08G003880	-3.7619	Glutaredoxin family protein
SS3012VS00	CmoCh13G000750	-3.7523	maternal effect embryo arrest 59
SS3012VS00	CmoCh07G007610	-3.75126	HTH-type transcriptional regulator protein ptxE
SS3012VS00	CmoCh01G015350	-3.75081	ethylene-responsive transcription factor ERF003-like
SS3072VS00	CmoCh09G011770	-3.75069	Unknown protein
SS30120VS00	CmoCh02G010310	-3.74344	CDGSH iron-sulfur domain-containing protein NEET
SS30120VS00	CmoCh12G009910	-3.73706	GDSL esterase/lipase
SS3072VS00	CmoCh10G003360	-3.73439	Stress up-regulated Nod 19 protein
SS30120VS00	CmoCh08G006170	-3.73221	gibberellin 3-beta-dioxygenase 1-like
SS3072VS00	CmoCh04G009090	-3.7257	Xyloglucan endotransglucosylase/hydrolase
SS3012VS00	CmoCh11G007320	-3.72	vacuolar protein sorting-associated protein 2 homolog 1
SS30120VS00	CmoCh03G009260	-3.71853	1-aminocyclopropane-1-carboxylate synthase
SS3072VS00	CmoCh04G002040	-3.7176	ribulose bisphosphate carboxylase/oxygenase activase, chloroplastic
SS3072VS00	CmoCh04G001040	-3.71626	Expansin
SS3012VS00	CmoCh20G004490	-3.70903	XB3 in
SS30120VS00	CmoCh19G009410	-3.70802	glycine-rich cell wall structural protein 1-like
SS3012VS00	CmoCh07G006150	-3.69814	Unknown protein
SS3012VS00	CmoCh07G006140	-3.69024	transcription factor bHLH19-like
SS3012VS00	CmoCh01G014560	-3.68263	EF hand calcium-binding family protein
SS3072VS00	CmoCh17G010010	-3.678	stachyose synthase-like
SS3072VS00	CmoCh01G010040	-3.67333	rRNA N-glycosidase
SS30120VS00	CmoCh15G000310	-3.6708	gibberellin-regulated protein 9
SS3012VS00	CmoCh14G015150	-3.66854	calmodulin-like protein 3
SS3012VS00	CmoCh11G019620	-3.66658	Protein of unknown function (DUF506)
SS3072VS00	CmoCh05G001580	-3.66309	Leucine-rich receptor-like protein kinase family protein
SS30120VS00	CmoCh11G005200	-3.65991	Bifunctional inhibitor/lipid-transfer protein/seed storage 2S albumin superfamily protein
SS30120VS00	CmoCh04G001040	-3.65451	Expansin
SS3012VS00	CmoCh01G010040	-3.6541	rRNA N-glycosidase
SS3072VS00	CmoCh20G008690	-3.65347	BURP domain-containing protein
SS30120VS00	CmoCh15G002940	-3.65083	Transcription factor protein
SS3072VS00	CmoCh20G002680	-3.64638	protein TOO MANY MOUTHS-like
SS3012VS00	CmoCh07G004820	-3.64471	Unknown protein
SS3072VS00	CmoCh04G009080	-3.64169	Xyloglucan endotransglucosylase/hydrolase
SS3012VS00	CmoCh15G009830	-3.6363	chaperone protein DnaJ-like isoform X1
SS3012VS00	CmoCh20G009000	-3.6353	alpha/beta-Hydrolases superfamily protein
SS3072VS00	CmoCh20G007880	-3.6318	auxin-responsive protein SAUR21-like
SS3012VS00	CmoCh12G010780	-3.63132	C2 domain-containing protein
SS30120VS00	CmoCh17G013730	-3.62804	Unknown protein
SS3012VS00	CmoCh19G006190	-3.62392	Cold regulated protein 27, putative isoform 2
SS30120VS00	CmoCh11G016050	-3.62069	protein LAZY 1-like isoform X1
SS30120VS00	CmoCh11G014330	-3.62067	ATP-dependent zinc metalloprotease FTSH
SS3072VS00	CmoCh08G001220	-3.61985	Auxin response factor
SS3072VS00	CmoCh15G012670	-3.6127	protein IQ-DOMAIN 31-like
SS3012VS00	CmoCh14G018000	-3.61217	Calmodulin
SS3072VS00	CmoCh15G009810	-3.61	Auxin efflux carrier component
SS3012VS00	CmoCh10G004350	-3.60419	Xyloglucan endotransglucosylase/hydrolase
SS3012VS00	CmoCh04G027180	-3.60139	Unknown protein
SS3072VS00	CmoCh02G017500	-3.59713	Flavin-containing monooxygenase
SS3012VS00	CmoCh19G010580	-3.59329	protein LIGHT-DEPENDENT SHORT HYPOCOTYLS 10
SS30120VS00	CmoCh08G001620	-3.59122	probably inactive receptor-like protein kinase At2g46850
SS3072VS00	CmoCh08G011360	-3.59109	DUF4218 domain-containing protein
SS3012VS00	CmoCh11G014150	-3.58527	zinc finger protein ZAT10
SS3012VS00	CmoCh17G008070	-3.58385	Phototropic-responsive NPH3 family protein
SS30120VS00	CmoCh20G007940	-3.57964	SAUR-like auxin-responsive protein family
SS3012VS00	CmoCh16G009100	-3.57367	Thiamine thiazole synthase, chloroplastic
SS3072VS00	CmoCh06G003400	-3.57233	Rab-GAP TBC domain-containing protein
SS3072VS00	CmoCh20G007910	-3.56917	auxin-responsive protein SAUR24-like
SS3072VS00	CmoCh14G005040	-3.56689	cytochrome P450 94A1-like
SS3012VS00	CmoCh07G010120	-3.56458	Plant protein 1589 of unknown function
SS3012VS00	CmoCh01G001030	-3.56324	GATA transcription factor
SS3024VS00	CmoCh09G012450	-3.56266	Ethylene-responsive transcription factor
SS3012VS00	CmoCh07G006920	-3.56207	transcription factor MYB44-like
SS30120VS00	CmoCh13G009030	-3.55962	short-chain dehydrogenase TIC 32, chloroplastic-like
SS3072VS00	CmoCh06G012600	-3.55533	glycine-rich protein 5-like
SS3012VS00	CmoCh07G006710	-3.55221	Peroxidase
SS3072VS00	CmoCh01G016570	-3.54964	RNA-binding protein 38
SS3012VS00	CmoCh17G006350	-3.54066	FLZ-type domain-containing protein
SS3072VS00	CmoCh01G001260	-3.54016	Auxin-responsive protein
SS3072VS00	CmoCh06G000550	-3.53938	protein PHYTOCHROME KINASE SUBSTRATE 4-like
SS3012VS00	CmoCh15G000230	-3.53696	Sucrose-phosphate synthase
SS3012VS00	CmoCh07G000520	-3.53582	Ethylene-responsive nuclear family protein
SS3012VS00	CmoCh14G012240	-3.53561	protein TIFY 10b-like
SS3012VS00	CmoCh11G002590	-3.53451	Calcium-binding protein CML15
SS30120VS00	CmoCh12G001200	-3.53407	WW domain-containing protein
SS30120VS00	CmoCh13G009040	-3.53055	Unknown protein
SS3012VS00	CmoCh06G004140	-3.52545	2-oxoglutarate (2OG) and Fe(II)-dependent oxygenase superfamily protein
SS30120VS00	CmoCh14G013540	-3.52388	Auxin-responsive protein
SS3012VS00	CmoCh11G000580	-3.52262	vinorine synthase-like
SS3072VS00	CmoCh11G005200	-3.51871	Bifunctional inhibitor/lipid-transfer protein/seed storage 2S albumin superfamily protein
SS30120VS00	CmoCh11G010480	-3.51507	myb-related protein 306-like
SS30120VS00	CmoCh13G001420	-3.50723	3-ketoacyl-CoA synthase
SS3012VS00	CmoCh14G006670	-3.50426	Protein of unknown function (DUF1645)
SS3012VS00	CmoCh13G011460	-3.50261	homeobox-leucine zipper protein HDG11-like
SS3072VS00	CmoCh04G011330	-3.50157	DYW_deaminase domain-containing protein
SS3012VS00	CmoCh10G006290	-3.49821	ABC transporter G family member 38-like
SS3012VS00	CmoCh17G013730	-3.4937	Unknown protein
SS3012VS00	CmoCh01G001920	-3.49173	WRKY protein
SS3024VS00	CmoCh07G003850	-3.49002	endochitinase-like
SS3072VS00	CmoCh19G006250	-3.48841	Leucine-rich repeat protein kinase family protein
SS3024VS00	CmoCh15G014480	-3.48827	Photolyase/cryptochrome alpha/beta domain-containing protein
SS3072VS00	CmoCh04G011320	-3.48479	Expansin
SS3072VS00	CmoCh20G005670	-3.4805	lysosomal Pro-X carboxypeptidase-like
SS3024VS00	CmoCh07G001300	-3.47859	Chlorophyll a-b binding protein, chloroplastic
SS3012VS00	CmoCh10G005600	-3.47734	Bifunctional inhibitor/lipid-transfer protein/seed storage 2S albumin superfamily protein
SS3012VS00	CmoCh07G013530	-3.46886	polygalacturonase inhibitor-like
SS3072VS00	CmoCh13G001530	-3.46884	zinc finger protein CONSTANS-LIKE 5-like
SS3012VS00	CmoCh01G020610	-3.46838	4-coumarate--CoA ligase
SS3072VS00	CmoCh11G016050	-3.4677	protein LAZY 1-like isoform X1
SS30120VS00	CmoCh11G004130	-3.46283	1-deoxy-D-xylulose-5-phosphate synthase
SS3012VS00	CmoCh06G008550	-3.45431	FLZ-type domain-containing protein
SS3012VS00	CmoCh02G004460	-3.45401	extensin-like isoform X1
SS3072VS00	CmoCh01G019050	-3.45297	Calcium-binding EF-hand
SS30120VS00	CmoCh20G007830	-3.44676	auxin-responsive protein SAUR24-like
SS3072VS00	CmoCh20G007870	-3.44407	auxin-responsive protein SAUR24-like
SS3072VS00	CmoCh01G009640	-3.43334	glutelin type-D 1-like
SS3024VS00	CmoCh04G014180	-3.43197	Annexin
SS3072VS00	CmoCh10G003830	-3.43151	sodium transporter HKT1
SS3072VS00	CmoCh07G009450	-3.42668	Auxin responsive SAUR protein
SS30120VS00	CmoCh05G012980	-3.42566	MYB transcription factor
SS3072VS00	CmoCh14G001270	-3.42431	Heat shock protein DnaJ, cysteine-rich domain containing protein
SS30120VS00	CmoCh13G000130	-3.4242	protein NUCLEAR FUSION DEFECTIVE 4-like
SS30120VS00	CmoCh01G009400	-3.42326	Thioredoxin-dependent peroxiredoxin
SS3072VS00	CmoCh08G001670	-3.41579	protein LAZY 1-like
SS3072VS00	CmoCh14G014250	-3.41549	ethylene-responsive transcription factor LEP-like
SS3072VS00	CmoCh13G009030	-3.41044	short-chain dehydrogenase TIC 32, chloroplastic-like
SS3072VS00	CmoCh05G000280	-3.41006	Plant protein 1589 of unknown function
SS3072VS00	CmoCh18G002680	-3.40603	Glyoxalase I
SS3012VS00	CmoCh09G000950	-3.40504	thaumatin-like protein 1b
SS3012VS00	CmoCh09G008110	-3.40269	Bulb-type lectin domain-containing protein
SS30120VS00	CmoCh04G008280	-3.39955	homeobox-leucine zipper protein ATHB-40-like
SS30120VS00	CmoCh06G014680	-3.39931	CASP-like protein
SS3012VS00	CmoCh17G002430	-3.39222	protein FANTASTIC FOUR 3-like
SS3012VS00	CmoCh16G001900	-3.392	protein EXORDIUM-like 3
SS30120VS00	CmoCh11G004310	-3.39184	tetraspanin-15-like
SS30120VS00	CmoCh13G004380	-3.39089	vacuolar protein 8-like
SS3072VS00	CmoCh11G007230	-3.38823	DDE Tnp4 domain-containing protein
SS3012VS00	CmoCh02G014660	-3.38813	phosphoglycerate mutase-like protein AT74H
SS3012VS00	CmoCh13G001080	-3.38736	Protein Ycf2
SS3012VS00	CmoCh20G000260	-3.3787	Chlororespiratory reduction 42
SS3012VS00	CmoCh20G000270	-3.3787	Yippee domain-containing protein
SS3072VS00	CmoCh19G009410	-3.37662	glycine-rich cell wall structural protein 1-like
SS3072VS00	CmoCh12G006270	-3.37444	NAC domain-containing protein
SS3072VS00	CmoCh04G006990	-3.37135	gibberellin 2-beta-dioxygenase 1-like
SS3072VS00	CmoCh10G001090	-3.36491	LOB domain-containing protein
SS3072VS00	CmoCh07G001300	-3.35939	Chlorophyll a-b binding protein, chloroplastic
SS3012VS00	CmoCh07G003080	-3.35742	peroxisomal membrane protein PMP22
SS30120VS00	CmoCh15G012620	-3.35607	ethylene-responsive transcription factor ERF027-like
SS3024VS00	CmoCh11G004130	-3.35253	1-deoxy-D-xylulose-5-phosphate synthase
SS3012VS00	CmoCh15G009940	-3.35118	Unknown protein
SS3012VS00	CmoCh18G002180	-3.34084	MYND-type domain-containing protein
SS3072VS00	CmoCh01G019860	-3.34013	jasmonate O-methyltransferase-like
SS3012VS00	CmoCh07G002920	-3.33821	glucose-6-phosphate/phosphate translocator 2, chloroplastic-like
SS30120VS00	CmoCh19G011190	-3.32619	zinc finger protein CONSTANS-LIKE 5-like
SS3012VS00	CmoCh11G014950	-3.32459	Glycosyltransferase
SS30120VS00	CmoCh15G008260	-3.32414	Protein arginine N-methyltransferase
SS3072VS00	CmoCh02G006100	-3.32345	kirola-like
SS30120VS00	CmoCh20G009250	-3.32024	S-norcoclaurine synthase 1-like
SS3012VS00	CmoCh11G018300	-3.3151	sodium/potassium/calcium exchanger 1-like
SS3012VS00	CmoCh15G013220	-3.31349	LEA_2 domain-containing protein
SS3072VS00	CmoCh02G004800	-3.31164	Growth-regulating factor
SS3072VS00	CmoCh13G004380	-3.30745	vacuolar protein 8-like
SS3012VS00	CmoCh05G003820	-3.30242	C2 NT-type domain-containing protein
SS3012VS00	CmoCh16G009190	-3.3013	Potassium/sodium hyperpolarization-activated cyclic nucleotide-gated channel 1
SS3012VS00	CmoCh06G007940	-3.30072	Bifunctional inhibitor/lipid-transfer protein/seed storage 2S albumin superfamily protein
SS3072VS00	CmoCh05G007420	-3.29943	cadmium/zinc-transporting ATPase HMA2-like isoform X1
SS3072VS00	CmoCh19G001500	-3.29707	Flavin-containing monooxygenase
SS3012VS00	CmoCh14G014930	-3.29449	WRKY domain-containing protein
SS3012VS00	CmoCh08G006470	-3.29255	Sulfate transporter, putative
SS3012VS00	CmoCh07G007160	-3.29233	mitogen-activated protein kinase kinase kinase 17-like
SS3072VS00	CmoCh20G004730	-3.29106	3-ketoacyl-CoA synthase
SS30120VS00	CmoCh10G009920	-3.28685	beta-glucosidase 12-like
SS3072VS00	CmoCh14G007750	-3.28654	NAD(P)-binding Rossmann-fold superfamily protein
SS3012VS00	CmoCh17G000560	-3.28481	Cyclin
SS3012VS00	CmoCh01G006860	-3.283	Phosphomethylpyrimidine synthase
SS3012VS00	CmoCh02G000970	-3.2816	transcription factor bHLH162-like
SS3072VS00	CmoCh20G007920	-3.28138	auxin-responsive protein SAUR24-like
SS3012VS00	CmoCh01G009620	-3.2755	cucumber peeling cupredoxin-like
SS3072VS00	CmoCh08G008280	-3.2709	transcription factor UNE10-like
SS3012VS00	CmoCh11G019910	-3.26923	Protein root UVB sensitive 1, chloroplastic
SS3012VS00	CmoCh04G000760	-3.26923	adagio protein 3-like
SS30120VS00	CmoCh11G014110	-3.2621	Glutamate racemase
SS3012VS00	CmoCh01G006890	-3.26107	Tetratricopeptide repeat-like superfamily protein
SS3012VS00	CmoCh03G014000	-3.25933	Tify domain-containing protein
SS3012VS00	CmoCh01G014410	-3.25924	ethylene-responsive transcription factor ERF014-like
SS30120VS00	CmoCh17G002390	-3.24709	Pentatricopeptide repeat (PPR) superfamily protein
SS3012VS00	CmoCh04G004400	-3.24447	Unknown protein
SS3012VS00	CmoCh18G011180	-3.24322	Adenine nucleotide alpha hydrolases-like superfamily protein
SS3012VS00	CmoCh04G017360	-3.23515	amino acid transporter AVT1I-like
SS3072VS00	CmoCh01G020200	-3.22759	Auxin responsive SAUR protein
SS30120VS00	CmoCh15G012600	-3.22568	Unknown protein
SS3012VS00	CmoCh11G018440	-3.22416	Cytochrome b561 and DOMON domain-containing protein
SS30120VS00	CmoCh16G000760	-3.22198	arabinogalactan peptide 22-like
SS30120VS00	CmoCh06G009490	-3.22088	Auxin-responsive protein
SS30120VS00	CmoCh05G009420	-3.21751	Terpene cyclase/mutase family member
SS3072VS00	CmoCh17G004150	-3.21664	cytochrome P450 86A8
SS3012VS00	CmoCh20G007580	-3.21584	protein NUCLEAR FUSION DEFECTIVE 4-like
SS30120VS00	CmoCh13G011000	-3.20976	dof zinc finger protein 4-like
SS3024VS00	CmoCh03G013560	-3.20915	2-oxoglutarate (2OG) and Fe(II)-dependent oxygenase superfamily protein
SS3072VS00	CmoCh02G005670	-3.20885	cyclin-dependent kinase inhibitor 7-like
SS3024VS00	CmoCh15G014490	-3.20878	Unknown protein
SS3012VS00	CmoCh04G006430	-3.20449	abscisic acid 8'-hydroxylase 1-like
SS3012VS00	CmoCh14G018060	-3.20139	Non-specific serine/threonine protein kinase
SS30120VS00	CmoCh14G005960	-3.19797	aquaporin NIP2-1-like
SS3012VS00	CmoCh07G003540	-3.19708	phosphatidylinositol/phosphatidylcholine transfer protein SFH9-like
SS3012VS00	CmoCh09G011740	-3.18973	abscisic stress-ripening protein 2-like
SS3072VS00	CmoCh14G008550	-3.18901	kirola-like
SS3012VS00	CmoCh01G018210	-3.18587	Cellulose synthase-like protein
SS3072VS00	CmoCh05G013160	-3.17746	protein NRT1/ PTR FAMILY 6.2-like
SS3072VS00	CmoCh03G007150	-3.17713	Transducin/WD40 repeat-like superfamily protein
SS3012VS00	CmoCh01G020640	-3.17517	Arabidopsis protein of unknown function (DUF241)
SS3012VS00	CmoCh10G012320	-3.16987	Protein phosphatase 2C family protein
SS3012VS00	CmoCh16G000760	-3.16784	arabinogalactan peptide 22-like
SS3012VS00	CmoCh07G010770	-3.16764	phosphatidylinositol:ceramide inositolphosphotransferase 2-like
SS3012VS00	CmoCh15G001750	-3.16403	Unknown protein
SS30120VS00	CmoCh13G011760	-3.16348	TCP family transcription factor
SS3012VS00	CmoCh16G001040	-3.16218	protein REVEILLE 6-like isoform X1
SS3024VS00	CmoCh08G007980	-3.16129	Unknown protein
SS3024VS00	CmoCh04G011030	-3.15923	adagio protein 3-like
SS3012VS00	CmoCh04G004390	-3.15548	MADS-box transcription factor 23-like isoform X2
SS3012VS00	CmoCh02G000360	-3.15345	Chlorophyll a-b binding protein, chloroplastic
SS3072VS00	CmoCh03G011930	-3.15182	Expansin
SS3012VS00	CmoCh03G002320	-3.14862	Peptidase_M50 domain-containing protein
SS3012VS00	CmoCh19G007990	-3.14713	Arabidopsis protein of unknown function (DUF241)
SS3072VS00	CmoCh01G000280	-3.14351	D-3-phosphoglycerate dehydrogenase
SS3072VS00	CmoCh16G001450	-3.14345	CEN-like protein 1
SS3012VS00	CmoCh01G010080	-3.13876	UPF0496 protein 4
SS3072VS00	CmoCh05G013370	-3.13699	(1->3)-beta-glucan endohydrolase
SS30120VS00	CmoCh04G014180	-3.12929	Annexin
SS3012VS00	CmoCh19G008790	-3.12899	Chlorophyll a-b binding protein, chloroplastic
SS3012VS00	CmoCh06G014310	-3.12858	Unknown protein
SS3012VS00	CmoCh02G004450	-3.12717	Unknown protein
SS3072VS00	CmoCh18G011810	-3.12284	protein PHYTOCHROME KINASE SUBSTRATE 1-like
SS3012VS00	CmoCh20G008930	-3.11846	CCG-binding protein 1
SS3072VS00	CmoCh15G003850	-3.11739	zinc finger protein CONSTANS-LIKE 7 isoform X1
SS30120VS00	CmoCh02G003440	-3.11542	auxin-responsive protein SAUR21-like
SS3072VS00	CmoCh18G010320	-3.1151	3-ketoacyl-CoA synthase
SS3012VS00	CmoCh05G005440	-3.11396	RING-H2 finger protein ATL34-like
SS3072VS00	CmoCh03G013900	-3.11294	Unknown protein
SS3072VS00	CmoCh18G003160	-3.11155	B-box type zinc finger protein
SS3012VS00	CmoCh14G013060	-3.10875	dof zinc finger protein DOF1.7-like
SS3012VS00	CmoCh08G007910	-3.10718	DnaJ-like protein subfamily B member 6-like
SS3012VS00	CmoCh06G001020	-3.10578	homeobox-leucine zipper protein HOX11-like
SS3072VS00	CmoCh14G009510	-3.10546	myb-related protein P-like
SS3012VS00	CmoCh14G011800	-3.10425	Transcription factor CAULIFLOWER
SS3072VS00	CmoCh14G013540	-3.1039	Auxin-responsive protein
SS3072VS00	CmoCh10G000360	-3.10172	Bidirectional sugar transporter SWEET
SS3012VS00	CmoCh16G001160	-3.09988	C2 domain-containing protein
SS3012VS00	CmoCh07G010760	-3.09884	Unknown protein
SS30120VS00	CmoCh20G007850	-3.09683	auxin-responsive protein SAUR21-like
SS3072VS00	CmoCh14G000970	-3.09678	Protein of unknown function (DUF3527)
SS3072VS00	CmoCh16G000760	-3.09087	arabinogalactan peptide 22-like
SS3012VS00	CmoCh13G000710	-3.08805	Cl574_1
SS3012VS00	CmoCh01G008330	-3.08578	agamous-like MADS-box protein AGL65 isoform X1
SS3012VS00	CmoCh05G011240	-3.08456	Lipoxygenase
SS3024VS00	CmoCh03G014000	-3.08087	Tify domain-containing protein
SS3012VS00	CmoCh06G008260	-3.07891	ethylene-responsive transcription factor 2-like
SS30120VS00	CmoCh01G000820	-3.07669	GDSL esterase/lipase APG
SS3012VS00	CmoCh07G002610	-3.07494	Unknown protein
SS3012VS00	CmoCh16G011670	-3.06862	ethylene-responsive transcription factor 2-like
SS3012VS00	CmoCh18G013450	-3.06387	Retrovirus-related Pol polyprotein from transposon RE1
SS3012VS00	CmoCh04G018510	-3.059	Protein DETOXIFICATION
SS3012VS00	CmoCh04G007400	-3.05676	ethylene-responsive transcription factor ERF061-like
SS3012VS00	CmoCh04G022010	-3.05193	Ribose-5-phosphate isomerase
SS30120VS00	CmoCh14G013190	-3.05003	Unknown protein
SS30120VS00	CmoCh20G005930	-3.04964	transcription factor MYB30-like
SS3072VS00	CmoCh04G008070	-3.04933	GATA transcription factor 19-like
SS30120VS00	CmoCh01G018370	-3.04884	Protein SOB FIVE-LIKE 5
SS3072VS00	CmoCh05G007450	-3.0478	cadmium/zinc-transporting ATPase HMA2-like isoform X1
SS3072VS00	CmoCh04G009000	-3.04225	Unknown protein
SS3012VS00	CmoCh11G014330	-3.04142	ATP-dependent zinc metalloprotease FTSH
SS3072VS00	CmoCh01G018300	-3.04087	DUF4378 domain-containing protein
SS3072VS00	CmoCh02G003430	-3.03895	auxin-responsive protein SAUR21-like
SS3072VS00	CmoCh11G003170	-3.03342	phosphoethanolamine N-methyltransferase-like
SS3072VS00	CmoCh11G017130	-3.03175	auxin-induced protein 15A-like
SS30120VS00	CmoCh16G000770	-3.03147	cation/H(+) antiporter 3-like
SS3072VS00	CmoCh17G011580	-3.0261	Plant protein of unknown function (DUF868)
SS3072VS00	CmoCh04G027460	-3.0224	WAT1-related protein
SS3072VS00	CmoCh10G009950	-3.01957	beta-glucosidase 24-like
SS3072VS00	CmoCh08G002510	-3.01186	auxin-induced in root cultures protein 12-like
SS3072VS00	CmoCh02G000360	-3.01031	Chlorophyll a-b binding protein, chloroplastic
SS3072VS00	CmoCh19G006090	-3.00992	Leucine-rich repeat family protein
SS3072VS00	CmoCh08G006820	-3.00349	aquaporin TIP2-1-like
SS3012VS00	CmoCh03G005740	-3.00263	Pectate lyase
SS30120VS00	CmoCh02G003380	-3.00164	auxin-responsive protein SAUR24-like
SS3012VS00	CmoCh06G002720	-3.00152	Receptor-like serine/threonine-protein kinase
SS3072VS00	CmoCh19G005380	3.00011	Pathogenesis-related protein-1-like protein
SS30120VS00	CmoCh11G001620	3.00328	mini zinc finger protein 3-like
SS3072VS00	CmoCh16G010100	3.00554	Unknown protein
SS3012VS00	CmoCh02G007900	3.006	Unknown protein
SS3012VS00	CmoCh04G021060	3.00768	Protein kinase domain-containing protein
SS30120VS00	CmoCh19G009700	3.00918	Unknown protein
SS30120VS00	CmoCh06G013700	3.01255	Calmodulin
SS3072VS00	CmoCh14G018470	3.01297	Inorganic phosphate transporter 1-1
SS3012VS00	CmoCh04G007010	3.01417	Solanesyl diphosphate synthase, putative
SS3012VS00	CmoCh04G002510	3.01543	Exocyst subunit Exo70 family protein
SS3012VS00	CmoCh04G001080	3.01658	GATA-N domain-containing protein
SS3072VS00	CmoCh03G001620	3.01918	Integrase catalytic domain-containing protein
SS3012VS00	CmoCh04G011960	3.0198	plasma membrane intrinsic protein 1;4
SS3012VS00	CmoCh13G001470	3.02055	phenolic glucoside malonyltransferase 1-like
SS3072VS00	CmoCh15G013170	3.02073	heavy metal-associated isoprenylated plant protein 39-like
SS30120VS00	CmoCh19G008500	3.02076	Subtilisin-like protein protease
SS3012VS00	CmoCh10G005150	3.02303	temperature-induced lipocalin-1-like
SS30120VS00	CmoCh20G006360	3.0231	cellulose synthase-like protein H1
SS3072VS00	CmoCh03G012560	3.02741	Heat stress transcription factor B-2a-like
SS3072VS00	CmoCh12G000070	3.02986	Poly [ADP-ribose] polymerase
SS3012VS00	CmoCh15G014060	3.02996	RING-type E3 ubiquitin transferase
SS30120VS00	CmoCh15G000510	3.03298	zinc finger protein 6-like
SS30120VS00	CmoCh11G015480	3.03729	Phloem filament protein
SS3072VS00	CmoCh16G002130	3.03859	Unknown protein
SS3012VS00	CmoCh02G007990	3.04218	Protein kinase domain-containing protein
SS3072VS00	CmoCh12G006790	3.04397	phosphate transporter PHO1 homolog 3-like
SS3072VS00	CmoCh16G010110	3.04591	HMA domain-containing protein
SS3012VS00	CmoCh03G010010	3.04595	Peroxidase
SS3072VS00	CmoCh01G000320	3.04624	cytochrome P450 71A1-like
SS3024VS00	CmoCh05G000100	3.04739	polygalacturonase 1 beta-like protein 3
SS3072VS00	CmoCh10G007030	3.0491	Pectinesterase
SS3012VS00	CmoCh13G006600	3.0503	Protein of unknown function (DUF506)
SS3072VS00	CmoCh06G006050	3.05297	ELL-associated factor 1-like
SS3072VS00	CmoCh03G009380	3.05322	Growth-regulating factor
SS3072VS00	CmoCh06G000990	3.05356	Protein kinase domain-containing protein
SS3072VS00	CmoCh01G008360	3.05361	Protein of unknown function (DUF962)
SS3012VS00	CmoCh14G009710	3.05365	GDSL esterase/lipase
SS3072VS00	CmoCh07G009510	3.05429	Phenylalanine ammonia-lyase
SS3072VS00	CmoCh02G012500	3.05463	Peroxidase
SS3012VS00	CmoCh18G004990	3.05473	Berberine bridge enzyme-like
SS3072VS00	CmoCh14G002240	3.0549	alpha carbonic anhydrase 7-like
SS3072VS00	CmoCh04G003600	3.05516	Unknown protein
SS3072VS00	CmoCh05G003720	3.05956	Flotillin-like
SS30120VS00	CmoCh03G000660	3.06064	Protein of unknown function (DUF1138)
SS3012VS00	CmoCh04G009700	3.06127	Metallothionein-like protein type 3
SS3072VS00	CmoCh14G013610	3.06971	boron transporter 4-like
SS3072VS00	CmoCh04G018230	3.06972	Pectin lyase-like superfamily protein
SS3072VS00	CmoCh06G009570	3.06998	NAC domain-containing protein 40-like
SS3072VS00	CmoCh07G009470	3.07278	Phenylalanine ammonia-lyase
SS3012VS00	CmoCh18G001110	3.07397	Pentatricopeptide repeat-containing protein chloroplastic-like
SS3072VS00	CmoCh12G013370	3.07875	Cytokinin dehydrogenase
SS30120VS00	CmoCh03G006230	3.08174	U-box domain-containing protein 35-like
SS3012VS00	CmoCh04G021260	3.08175	Unknown protein
SS3012VS00	CmoCh09G002910	3.08234	lecithin-cholesterol acyltransferase-like 1
SS30120VS00	CmoCh04G025560	3.08801	Unknown protein
SS30120VS00	CmoCh04G002310	3.08877	zinc finger protein ZAT12-like
SS3072VS00	CmoCh20G005450	3.09195	heavy metal-associated isoprenylated plant protein 3
SS3072VS00	CmoCh16G001160	3.0949	C2 domain-containing protein
SS30120VS00	CmoCh09G003180	3.0952	transcription factor MYB36-like
SS3072VS00	CmoCh14G021330	3.09582	acidic endochitinase-like
SS3012VS00	CmoCh11G015630	3.09736	nudix hydrolase 13, mitochondrial-like
SS30120VS00	CmoCh04G004660	3.09805	Phytosulfokine-beta
SS3012VS00	CmoCh10G008250	3.10062	Lysine ketoglutarate reductase
SS3012VS00	CmoCh04G018920	3.10172	protein terminal ear1-like
SS3072VS00	CmoCh18G007660	3.10498	RING-type domain-containing protein
SS3072VS00	CmoCh03G000560	3.10693	Heat Stress Transcription Factor family protein
SS30120VS00	CmoCh10G012230	3.1092	calmodulin-binding protein 60 G-like
SS3072VS00	CmoCh02G002230	3.10953	Protein kinase domain-containing protein
SS30120VS00	CmoCh15G014720	3.10997	MFS domain-containing protein
SS30120VS00	CmoCh05G007700	3.11163	cytochrome P450 CYP73A100-like
SS30120VS00	CmoCh16G008950	3.11335	2-iminobutanoate/2-iminopropanoate deaminase-like
SS3024VS00	CmoCh13G001290	3.11357	metallothionein-like protein LSC54
SS30120VS00	CmoCh08G003920	3.11516	Glutaredoxin
SS3072VS00	CmoCh05G003550	3.11589	WRKY protein
SS30120VS00	CmoCh11G001490	3.11691	WRKY transcription factor 19
SS30120VS00	CmoCh04G008590	3.11779	FLZ-type domain-containing protein
SS3012VS00	CmoCh02G008000	3.11876	pentatricopeptide repeat-containing protein At1g07590, mitochondrial
SS3012VS00	CmoCh19G002490	3.12057	fibroin heavy chain-like isoform X4
SS3072VS00	CmoCh16G003360	3.12154	trypsin inhibitor 1-like
SS3072VS00	CmoCh02G015000	3.12164	Unknown protein
SS3072VS00	CmoCh20G000450	3.123	Dirigent protein
SS3012VS00	CmoCh01G012620	3.12539	protein SPA1-RELATED 3-like isoform X1
SS3072VS00	CmoCh09G007510	3.12577	protein MODIFYING WALL LIGNIN-2-like
SS30120VS00	CmoCh08G004720	3.1297	WRKY transcription factor
SS30120VS00	CmoCh14G018460	3.13026	ethylene-responsive transcription factor 1B
SS3072VS00	CmoCh07G012590	3.13043	GFO_IDH_MocA domain-containing protein
SS3072VS00	CmoCh15G004060	3.13049	CASP-like protein
SS30120VS00	CmoCh14G009490	3.13231	neuronal acetylcholine receptor subunit alpha-2-like
SS3072VS00	CmoCh04G027620	3.13357	CASP-like protein
SS3072VS00	CmoCh18G007390	3.13442	Cytochrome P450
SS3012VS00	CmoCh01G014740	3.13764	Unknown protein
SS3012VS00	CmoCh04G001840	3.13907	Encodes a protein involved in salt tolerance, names SIS (Salt Induced Serine rich).
SS3072VS00	CmoCh05G013230	3.14267	early nodulin-93-like
SS30120VS00	CmoCh11G007680	3.14778	Sucrose synthase
SS3072VS00	CmoCh19G007970	3.14868	NAC domain-containing protein
SS30120VS00	CmoCh01G010810	3.14895	GPI-anchored protein LLG1-like
SS30120VS00	CmoCh08G006440	3.15095	thionin-like protein 2
SS3072VS00	CmoCh09G003180	3.15116	transcription factor MYB36-like
SS3012VS00	CmoCh03G003080	3.15199	Protein kinase domain-containing protein
SS3072VS00	CmoCh12G004910	3.15855	Calmodulin
SS3072VS00	CmoCh16G009120	3.15941	Leucine-rich repeat protein
SS30120VS00	CmoCh11G004290	3.16	WAT1-related protein
SS3012VS00	CmoCh05G012410	3.16036	F-box protein At3g08750-like
SS30120VS00	CmoCh16G009340	3.16207	lactoylglutathione lyase-like
SS3072VS00	CmoCh04G022580	3.16278	Glutamate decarboxylase
SS3072VS00	CmoCh04G026870	3.16487	ABC transporter G family member 24-like
SS30120VS00	CmoCh04G023660	3.16744	AMP dependent ligase
SS3072VS00	CmoCh14G011770	3.16809	Pollen Ole e 1 allergen and extensin family protein
SS30120VS00	CmoCh19G004030	3.1682	ankyrin repeat-containing protein BDA1-like
SS3072VS00	CmoCh07G009530	3.16989	Phenylalanine ammonia-lyase
SS3012VS00	CmoCh13G003330	3.17055	WEB family protein At1g12150-like
SS3072VS00	CmoCh16G013110	3.17325	Protease inhibitor protein
SS3012VS00	CmoCh04G009790	3.18341	NAC domain-containing protein
SS30120VS00	CmoCh05G002130	3.18719	serpin-ZX-like
SS3072VS00	CmoCh05G006030	3.18756	oxidative stress 3
SS3072VS00	CmoCh07G005160	3.18766	Unknown protein
SS3012VS00	CmoCh08G001660	3.18907	Unknown protein
SS30120VS00	CmoCh01G018850	3.18941	HXXXD-type acyl-transferase family protein
SS3072VS00	CmoCh08G003870	3.1899	Unknown protein
SS3012VS00	CmoCh03G007290	3.19089	Unknown protein
SS3072VS00	CmoCh15G000480	3.19311	Unknown protein
SS30120VS00	CmoCh15G011410	3.19437	cucumisin-like
SS3012VS00	CmoCh09G000370	3.19748	Glyceraldehyde-3-phosphate dehydrogenase
SS30120VS00	CmoCh05G012490	3.20102	Ankyrin repeat-containing protein
SS3072VS00	CmoCh04G015600	3.20114	Unknown protein
SS3072VS00	CmoCh03G009950	3.20382	Heat shock transcription factor
SS3012VS00	CmoCh01G012260	3.20682	B-box-type zinc finger
SS3072VS00	CmoCh11G013960	3.20685	Glycosyltransferase
SS3012VS00	CmoCh19G009590	3.20998	B box-type domain-containing protein
SS3012VS00	CmoCh16G011430	3.21158	Protein kinase domain-containing protein
SS3012VS00	CmoCh10G012420	3.21287	transcription factor bHLH149-like
SS3072VS00	CmoCh06G007490	3.21415	Phospholipase D
SS3012VS00	CmoCh15G000180	3.21671	PPM-type phosphatase domain-containing protein
SS3072VS00	CmoCh02G010120	3.21806	late embryogenesis abundant protein At5g17165-like
SS30120VS00	CmoCh11G009740	3.22143	Germin-like protein
SS3012VS00	CmoCh04G002030	3.22287	LOB domain-containing protein 33-like
SS3072VS00	CmoCh20G000290	3.22778	IQ domain-containing protein IQM2-like
SS30120VS00	CmoCh06G009600	3.22811	NAC domain-containing protein 62-like
SS3072VS00	CmoCh06G015410	3.22914	Unknown protein
SS3072VS00	CmoCh06G002600	3.22978	PAR1 protein
SS3072VS00	CmoCh17G012650	3.23008	B3 domain-containing protein
SS30120VS00	CmoCh06G010490	3.2302	WRKY domain-containing protein
SS3072VS00	CmoCh11G007680	3.23726	Sucrose synthase
SS30120VS00	CmoCh08G000350	3.23943	Cytochrome P450
SS30120VS00	CmoCh04G020280	3.244	NADPH-dependent pterin aldehyde reductase-like
SS3012VS00	CmoCh12G000220	3.24452	L-tryptophan--pyruvate aminotransferase 1-like
SS3012VS00	CmoCh05G012010	3.24742	Sialidase-like isoform X3
SS3072VS00	CmoCh02G010630	3.24836	protein TPX2-like isoform X3
SS3012VS00	CmoCh15G014960	3.25137	Clavaminate synthase-like protein
SS3072VS00	CmoCh04G007680	3.25186	WRKY protein
SS3072VS00	CmoCh15G002450	3.2527	Methyl esterase
SS3072VS00	CmoCh10G000650	3.25311	EF hand calcium-binding family protein
SS3072VS00	CmoCh03G005420	3.25335	cysteine-rich receptor-like protein kinase 26
SS30120VS00	CmoCh11G016810	3.25787	Unknown protein
SS30120VS00	CmoCh04G017070	3.26179	protein NRT1/ PTR FAMILY 4.6-like
SS3012VS00	CmoCh02G010310	3.26528	CDGSH iron-sulfur domain-containing protein NEET
SS3012VS00	CmoCh05G007470	3.26685	oxysterol-binding protein-related protein 4C-like
SS3072VS00	CmoCh11G007150	3.26933	IQ domain-containing protein IQM1-like
SS3072VS00	CmoCh07G007390	3.26969	Unknown protein
SS30120VS00	CmoCh05G007130	3.27013	(R)-mandelonitrile lyase 1-like
SS3072VS00	CmoCh11G016800	3.27218	Pectin lyase-like superfamily protein
SS30120VS00	CmoCh07G002420	3.27634	heat stress transcription factor B-2a-like
SS3072VS00	CmoCh03G001830	3.27937	Unknown protein
SS3072VS00	CmoCh12G012760	3.28383	Arabinogalactan protein 22, putative
SS30120VS00	CmoCh01G016670	3.28408	SKI/DACH domain-containing protein 1
SS30120VS00	CmoCh01G008360	3.28443	Protein of unknown function (DUF962)
SS3072VS00	CmoCh04G025530	3.28526	Unknown protein
SS3072VS00	CmoCh15G006080	3.28579	serine decarboxylase-like
SS3072VS00	CmoCh02G001520	3.28997	blue copper protein-like
SS3012VS00	CmoCh06G016410	3.29015	disease resistance protein RGA2-like
SS30120VS00	CmoCh01G013700	3.2902	aspartyl protease family protein 2-like
SS30120VS00	CmoCh06G011270	3.29076	BON1-associated protein 2-like
SS3072VS00	CmoCh04G003920	3.29117	Glutamate dehydrogenase
SS3072VS00	CmoCh15G012800	3.29289	protein LURP-one-related 4-like
SS30120VS00	CmoCh11G006400	3.293	E3 ubiquitin-protein ligase ATL42-like
SS30120VS00	CmoCh01G003720	3.29686	Transmembrane protein
SS3072VS00	CmoCh19G001190	3.29857	exocyst complex component EXO84C-like
SS3012VS00	CmoCh03G010410	3.30323	ABC transporter F family member 5
SS3012VS00	CmoCh11G013130	3.30493	polyol transporter 5-like
SS3012VS00	CmoCh20G007790	3.30677	auxin-responsive protein SAUR21-like
SS3072VS00	CmoCh19G009700	3.30778	Unknown protein
SS3072VS00	CmoCh17G011030	3.30895	Transmembrane protein
SS3072VS00	CmoCh19G005900	3.30957	22.0 kDa heat shock protein-like
SS3012VS00	CmoCh18G004440	3.31405	purine permease 10
SS3072VS00	CmoCh04G015230	3.31499	nuclear pore complex protein NUP1-like isoform X1
SS3072VS00	CmoCh03G002730	3.31598	RING-type E3 ubiquitin transferase
SS3012VS00	CmoCh14G017390	3.31719	sugar transport protein 13-like
SS3012VS00	CmoCh04G001950	3.31914	ultraviolet-B receptor UVR8-like isoform X1
SS3072VS00	CmoCh09G006420	3.31958	ABSCISIC ACID-INSENSITIVE 5-like protein 2
SS30120VS00	CmoCh17G010760	3.31985	translocator protein homolog
SS3012VS00	CmoCh01G001170	3.3208	Unknown protein
SS30120VS00	CmoCh09G008200	3.32251	Unknown protein
SS3024VS00	CmoCh06G010440	3.32658	cyclic nucleotide-gated ion channel 1-like
SS3072VS00	CmoCh04G031130	3.32861	Glutamine amidotransferase type-1 domain-containing protein
SS3072VS00	CmoCh19G004020	3.32925	Ankyrin repeat-containing protein
SS3012VS00	CmoCh02G006280	3.32946	Protein of unknown function (DUF506)
SS3072VS00	CmoCh18G008030	3.32982	Protein of unknown function (DUF1645)
SS30120VS00	CmoCh20G006140	3.3299	Isocitrate lyase
SS3072VS00	CmoCh08G005940	3.33057	Plant protein of unknown function (DUF247)
SS3072VS00	CmoCh01G002810	3.33156	transcription factor MYB78-like
SS30120VS00	CmoCh16G003360	3.33248	trypsin inhibitor 1-like
SS3072VS00	CmoCh19G000820	3.33295	Unknown protein
SS3072VS00	CmoCh18G011510	3.33683	Unknown protein
SS3072VS00	CmoCh01G000850	3.33708	Leucine-rich repeat protein kinase family protein
SS30120VS00	CmoCh14G009390	3.33769	Epoxide hydrolase 2
SS3072VS00	CmoCh01G001900	3.33963	cinnamoyl coa reductase
SS3072VS00	CmoCh04G011250	3.34107	WRKY protein
SS3012VS00	CmoCh07G012040	3.34121	spermidine hydroxycinnamoyl transferase-like
SS30120VS00	CmoCh20G007250	3.34665	Cytokinin riboside 5'-monophosphate phosphoribohydrolase
SS3012VS00	CmoCh13G004260	3.35626	tonoplast dicarboxylate transporter
SS30120VS00	CmoCh07G007390	3.35678	Unknown protein
SS3072VS00	CmoCh16G002100	3.35703	Unknown protein
SS3012VS00	CmoCh12G006800	3.36026	phosphate transporter PHO1 homolog 3-like
SS3012VS00	CmoCh16G004200	3.36289	Ferredoxin
SS30120VS00	CmoCh08G009240	3.3718	Protein of unknown function (DUF1442)
SS30120VS00	CmoCh03G010450	3.37234	WRKY DNA-binding protein 51, putative
SS3012VS00	CmoCh17G000580	3.37431	RING-type E3 ubiquitin transferase
SS3072VS00	CmoCh14G012380	3.37483	Unknown protein
SS3072VS00	CmoCh11G018660	3.37536	Calcium-binding EF-hand family protein
SS3072VS00	CmoCh12G001260	3.38001	protein EXORDIUM-like 2
SS3072VS00	CmoCh12G004770	3.38043	calmodulin-like protein 12
SS3072VS00	CmoCh09G007220	3.38446	HTH myb-type domain-containing protein
SS3072VS00	CmoCh15G004040	3.38651	Phorbol-ester/DAG-type domain-containing protein
SS3012VS00	CmoCh14G012320	3.38751	Unknown protein
SS3072VS00	CmoCh05G007750	3.38894	protein BONZAI 3
SS3012VS00	CmoCh03G012330	3.38912	Cyclic nucleotide-gated channel
SS30120VS00	CmoCh17G007590	3.393	protein PLANT CADMIUM RESISTANCE 8
SS3012VS00	CmoCh17G012040	3.39317	S-protein homolog
SS30120VS00	CmoCh15G011220	3.39322	heavy metal-associated isoprenylated plant protein 39-like
SS30120VS00	CmoCh01G010800	3.39357	Unknown protein
SS3012VS00	CmoCh06G011100	3.40121	heavy metal-associated isoprenylated plant protein 39-like
SS3012VS00	CmoCh19G000700	3.40273	Serine proteinase inhibitor
SS3072VS00	CmoCh03G013740	3.40307	WRKY protein
SS3072VS00	CmoCh03G000530	3.40396	EGF domain-specific O-linked N-acetylglucosamine transferase-like
SS3072VS00	CmoCh10G005740	3.40553	mitogen-activated protein kinase kinase kinase 17-like
SS3012VS00	CmoCh14G015290	3.40585	salutaridinol 7-O-acetyltransferase-like
SS3072VS00	CmoCh08G006940	3.4106	actin-related protein 8-like
SS3012VS00	CmoCh11G019680	3.41067	Phosphoenolpyruvate carboxylase
SS30120VS00	CmoCh18G003240	3.41082	Unknown protein
SS30120VS00	CmoCh19G009630	3.41108	cysteine-rich repeat secretory protein 38-like
SS30120VS00	CmoCh02G002000	3.41189	MLO-like protein
SS3072VS00	CmoCh01G010800	3.41251	Unknown protein
SS3012VS00	CmoCh03G005870	3.41445	RING/U-box superfamily protein
SS3012VS00	CmoCh01G013660	3.41652	Alpha/beta-Hydrolases superfamily protein
SS30120VS00	CmoCh02G014510	3.41929	Mannan endo-1,4-beta-mannosidase
SS3072VS00	CmoCh14G006440	3.42023	protein ALTERED XYLOGLUCAN 4-like
SS3012VS00	CmoCh01G018830	3.42166	HXXXD-type acyl-transferase family protein
SS3072VS00	CmoCh03G009400	3.42169	Phytosulfokine-beta
SS3072VS00	CmoCh11G003010	3.42656	Protein DETOXIFICATION
SS3072VS00	CmoCh14G009600	3.42955	PMEI domain-containing protein
SS3072VS00	CmoCh11G009630	3.43104	Tyrosine phosphatase family protein
SS30120VS00	CmoCh08G008380	3.43399	Glycosyltransferase
SS3072VS00	CmoCh10G008600	3.4343	Tyrosine-protein phosphatase
SS3072VS00	CmoCh02G016420	3.43655	beta-amyrin 11-oxidase-like
SS3072VS00	CmoCh18G011500	3.43763	phosphate transporter PHO1 homolog 3-like
SS30120VS00	CmoCh08G003750	3.44129	Glutamic acid-rich protein
SS3012VS00	CmoCh04G030810	3.44147	Chloride channel protein
SS3012VS00	CmoCh20G008520	3.44698	F-box protein At2g16365-like
SS30120VS00	CmoCh11G004790	3.4507	chitotriosidase-1-like
SS3072VS00	CmoCh19G009620	3.45182	cysteine-rich repeat secretory protein 38-like
SS3012VS00	CmoCh04G007940	3.45506	Zinc finger, B-box
SS3012VS00	CmoCh01G012610	3.45657	Unknown protein
SS3012VS00	CmoCh09G008970	3.45781	Unknown protein
SS30120VS00	CmoCh02G004440	3.45819	Peroxidase
SS30120VS00	CmoCh14G018750	3.46796	protein NRT1/ PTR FAMILY 5.2-like
SS3072VS00	CmoCh08G001560	3.47035	SPX domain-containing protein
SS3012VS00	CmoCh16G000860	3.47036	ABC transporter C family member 10-like
SS30120VS00	CmoCh01G011490	3.47181	AAI domain-containing protein
SS3072VS00	CmoCh15G004130	3.47326	Heat shock 70 kDa protein
SS30120VS00	CmoCh17G009910	3.47466	transcription factor JAMYB-like
SS30120VS00	CmoCh07G002170	3.47799	NAC domain-containing protein 73-like
SS3012VS00	CmoCh20G010610	3.48011	ABC transporter-like
SS3072VS00	CmoCh16G000740	3.48091	WRKY domain-containing protein
SS30120VS00	CmoCh15G012800	3.48195	protein LURP-one-related 4-like
SS3072VS00	CmoCh10G000760	3.48295	adenine/guanine permease AZG2-like
SS3012VS00	CmoCh06G014320	3.48367	NEDD8-activating enzyme E1 catalytic subunit
SS30120VS00	CmoCh04G003840	3.4837	transcription factor MYB1R1
SS3072VS00	CmoCh17G005440	3.4873	O-methyltransferase family protein
SS3072VS00	CmoCh15G014610	3.49012	pfkB-like carbohydrate kinase family protein
SS30120VS00	CmoCh17G007400	3.49075	actin-related protein 8-like
SS3072VS00	CmoCh19G000650	3.49634	inhibitor of trypsin and hageman factor-like
SS3072VS00	CmoCh09G005360	3.49776	Pentatricopeptide repeat-containing protein
SS3012VS00	CmoCh19G007510	3.49937	DsbD_2 domain-containing protein
SS3072VS00	CmoCh07G007410	3.50287	Unknown protein
SS3072VS00	CmoCh01G017870	3.50377	Methyltransf_12 domain-containing protein
SS3072VS00	CmoCh13G007140	3.50426	Receptor-like serine/threonine-protein kinase
SS3072VS00	CmoCh01G013920	3.50439	VQ motif-containing protein 22-like
SS30120VS00	CmoCh04G027620	3.50558	CASP-like protein
SS3072VS00	CmoCh08G006440	3.5059	thionin-like protein 2
SS3072VS00	CmoCh06G005680	3.5078	Homogentisate solanesyltransferase, chloroplastic
SS3012VS00	CmoCh18G003990	3.5098	Non-specific serine/threonine protein kinase
SS3072VS00	CmoCh09G001880	3.51012	Cytochrome P450
SS3072VS00	CmoCh01G012820	3.5102	Aminotran_1_2 domain-containing protein
SS30120VS00	CmoCh11G013130	3.51065	polyol transporter 5-like
SS3072VS00	CmoCh06G009600	3.51278	NAC domain-containing protein 62-like
SS3012VS00	CmoCh01G020880	3.51742	protein PLASTID MOVEMENT IMPAIRED 1-like
SS3072VS00	CmoCh03G007540	3.5184	heavy metal-associated isoprenylated plant protein 43-like
SS3072VS00	CmoCh07G007400	3.52084	salicylic acid-binding protein 2-like
SS30120VS00	CmoCh16G002150	3.52206	Unknown protein
SS3012VS00	CmoCh03G008080	3.52278	protein ACTIVITY OF BC1 COMPLEX KINASE 8, chloroplastic-like
SS3072VS00	CmoCh14G013560	3.52447	pleiotropic drug resistance protein 1-like
SS30120VS00	CmoCh15G006160	3.52809	Unknown protein
SS3012VS00	CmoCh04G007720	3.52858	heavy metal-associated isoprenylated plant protein 39-like
SS3012VS00	CmoCh16G011440	3.53052	Beta-amylase
SS3072VS00	CmoCh02G018080	3.53295	cytochrome P450 94A2-like
SS3072VS00	CmoCh14G012800	3.53327	ankyrin repeat-containing protein NPR4-like isoform X3
SS3072VS00	CmoCh15G007040	3.53635	MYB transcription factor
SS3012VS00	CmoCh08G012630	3.53679	Pectin lyase-like superfamily protein
SS3072VS00	CmoCh02G001020	3.53755	Phospho-N-acetylmuramoyl-pentapeptide-transferase, putative
SS3012VS00	CmoCh03G009750	3.53959	Unknown protein
SS3012VS00	CmoCh09G000330	3.53962	protein PLASTID MOVEMENT IMPAIRED 1-like
SS30120VS00	CmoCh06G005680	3.54045	Homogentisate solanesyltransferase, chloroplastic
SS30120VS00	CmoCh09G007220	3.54198	HTH myb-type domain-containing protein
SS3072VS00	CmoCh15G014620	3.55269	MADS-box protein AGL42-like
SS3012VS00	CmoCh01G018840	3.55521	Unknown protein
SS30120VS00	CmoCh16G011940	3.55655	HMA domain-containing protein
SS3012VS00	CmoCh14G019050	3.55848	Glutathione S-transferase
SS30120VS00	CmoCh14G003470	3.5591	NDR1/HIN1-like protein 10
SS3072VS00	CmoCh16G004890	3.5635	gibberellin 2-beta-dioxygenase 1-like
SS3072VS00	CmoCh15G004210	3.56451	Unknown protein
SS3012VS00	CmoCh15G009530	3.56615	Unknown protein
SS3072VS00	CmoCh20G006510	3.56932	RAB GTPase homolog A1F
SS3012VS00	CmoCh03G007570	3.57017	S-adenosyl-L-methionine-dependent methyltransferases superfamily protein
SS3072VS00	CmoCh01G013480	3.57127	anthocyanidin 3-O-glucosyltransferase 2-like
SS3072VS00	CmoCh10G002500	3.5724	LOB domain-containing protein
SS3012VS00	CmoCh02G016420	3.57298	beta-amyrin 11-oxidase-like
SS3072VS00	CmoCh12G013430	3.57547	2-oxoglutarate (2OG) and Fe(II)-dependent oxygenase superfamily protein
SS3012VS00	CmoCh20G009160	3.57867	transcription factor MYB41-like
SS3072VS00	CmoCh04G003620	3.58043	Aconitate hydratase
SS3072VS00	CmoCh18G008170	3.58214	protein ASPARTIC PROTEASE IN GUARD CELL 2-like
SS3012VS00	CmoCh16G003610	3.58264	Unknown protein
SS30120VS00	CmoCh11G013610	3.58386	abscisic acid 8'-hydroxylase 4-like
SS3072VS00	CmoCh15G006160	3.58664	Unknown protein
SS3072VS00	CmoCh10G000680	3.5879	Citrulline--aspartate ligase
SS3012VS00	CmoCh13G006750	3.5901	lactosylceramide 4-alpha-galactosyltransferase-like
SS30120VS00	CmoCh17G010560	3.59124	indole-3-acetic acid-induced protein ARG2-like
SS30120VS00	CmoCh02G015440	3.59179	Protein of unknown function (DUF1442)
SS30120VS00	CmoCh07G007400	3.60155	salicylic acid-binding protein 2-like
SS3072VS00	CmoCh12G004900	3.60195	Calcium-binding EF-hand
SS3072VS00	CmoCh02G009710	3.60296	RING-type E3 ubiquitin transferase
SS3072VS00	CmoCh12G009560	3.60332	ABC transporter B family member 4-like
SS3072VS00	CmoCh08G004720	3.60505	WRKY transcription factor
SS3012VS00	CmoCh01G013120	3.60507	Protein phosphatase
SS3072VS00	CmoCh01G000840	3.60849	Leucine-rich repeat protein kinase family protein
SS30120VS00	CmoCh13G001100	3.60869	Lipoxygenase
SS3072VS00	CmoCh11G004790	3.60938	chitotriosidase-1-like
SS3072VS00	CmoCh02G008710	3.61461	RING/U-box superfamily protein
SS3012VS00	CmoCh04G017440	3.61801	cyclic dof factor 1
SS30120VS00	CmoCh14G010740	3.61855	cinnamoyl coa reductase
SS3072VS00	CmoCh14G004380	3.62604	BZIP transcription factor family protein
SS30120VS00	CmoCh10G002500	3.62653	LOB domain-containing protein
SS3072VS00	CmoCh04G004660	3.62743	Phytosulfokine-beta
SS3012VS00	CmoCh19G000690	3.6288	Serine proteinase inhibitor
SS30120VS00	CmoCh11G016070	3.62955	WRKY protein
SS30120VS00	CmoCh15G000180	3.6356	PPM-type phosphatase domain-containing protein
SS3072VS00	CmoCh10G009020	3.63608	RING-type E3 ubiquitin transferase
SS30120VS00	CmoCh04G022560	3.63901	DUF629 domain-containing protein
SS30120VS00	CmoCh03G009360	3.64048	Unknown protein
SS30120VS00	CmoCh06G006990	3.64186	caffeic acid 3-O-methyltransferase-like
SS30120VS00	CmoCh15G010610	3.64324	Unknown protein
SS3012VS00	CmoCh03G004260	3.64402	L-type lectin-domain containing receptor kinase S.4-like
SS3072VS00	CmoCh09G012610	3.64571	TMV resistance protein N-like
SS30120VS00	CmoCh18G006380	3.64933	Unknown protein
SS30120VS00	CmoCh04G020270	3.65191	NADPH-dependent pterin aldehyde reductase-like
SS3072VS00	CmoCh16G012800	3.65278	Endoglucanase
SS30120VS00	CmoCh11G016800	3.65889	Pectin lyase-like superfamily protein
SS3012VS00	CmoCh18G006380	3.66653	Unknown protein
SS30120VS00	CmoCh18G003230	3.6686	3'(2'),5'-bisphosphate nucleotidase
SS3072VS00	CmoCh17G004180	3.67022	Cysteine synthase
SS3012VS00	CmoCh02G001020	3.67163	Phospho-N-acetylmuramoyl-pentapeptide-transferase, putative
SS3072VS00	CmoCh04G008590	3.67173	FLZ-type domain-containing protein
SS3072VS00	CmoCh01G017990	3.67225	17.1 kDa class II heat shock protein-like
SS30120VS00	CmoCh11G018660	3.67248	Calcium-binding EF-hand family protein
SS3012VS00	CmoCh17G012030	3.67325	transcription factor PIF1-like
SS3012VS00	CmoCh05G013450	3.67406	heat stress transcription factor C-1-like
SS3072VS00	CmoCh02G014260	3.67847	Glycosyltransferase
SS30120VS00	CmoCh19G009180	3.68375	O-methyltransferase
SS30120VS00	CmoCh17G002330	3.68539	sugar transport protein 13-like
SS3072VS00	CmoCh11G020510	3.68649	Unknown protein
SS3012VS00	CmoCh20G011580	3.68676	PQ-loop repeat family protein / transmembrane family protein
SS3012VS00	CmoCh11G010390	3.6896	cyclic dof factor 2-like
SS3072VS00	CmoCh08G009240	3.69149	Protein of unknown function (DUF1442)
SS3072VS00	CmoCh20G003650	3.69233	Acyl-CoA N-acyltransferase with RING/FYVE/PHD-type zinc finger protein
SS3024VS00	CmoCh08G005780	3.6943	shikimate O-hydroxycinnamoyltransferase-like
SS3072VS00	CmoCh08G008380	3.69769	Glycosyltransferase
SS3012VS00	CmoCh14G021830	3.70258	Unknown protein
SS3072VS00	CmoCh20G009160	3.70434	transcription factor MYB41-like
SS3072VS00	CmoCh01G003190	3.70768	Indole-3-acetic acid-induced protein ARG2
SS3072VS00	CmoCh02G004190	3.70892	Non-symbiotic hemoglobin, putative
SS30120VS00	CmoCh11G018640	3.70998	Unknown protein
SS3012VS00	CmoCh18G005580	3.71115	E3 ubiquitin-protein ligase COP1-like
SS30120VS00	CmoCh10G012340	3.72244	calmodulin-binding protein 60 A-like isoform X2
SS3072VS00	CmoCh09G007050	3.72592	Glycosyltransferase
SS30120VS00	CmoCh08G004800	3.72618	MYB transcription factor
SS30120VS00	CmoCh15G004330	3.7309	Dirigent protein
SS3072VS00	CmoCh18G009140	3.7367	protein NUCLEAR FUSION DEFECTIVE 4
SS30120VS00	CmoCh15G004470	3.73678	Unknown protein
SS3012VS00	CmoCh11G013070	3.73904	Sodium/hydrogen exchanger
SS3072VS00	CmoCh09G007650	3.74136	Unknown protein
SS3072VS00	CmoCh11G018640	3.74264	Unknown protein
SS3012VS00	CmoCh13G007120	3.74395	Receptor-like serine/threonine-protein kinase
SS3012VS00	CmoCh05G010330	3.74435	S-adenosylmethionine decarboxylase proenzyme
SS3072VS00	CmoCh18G004690	3.74765	phospholipase A1-Igamma1, chloroplastic-like
SS3072VS00	CmoCh01G011490	3.74867	AAI domain-containing protein
SS3072VS00	CmoCh08G012220	3.7499	major allergen Pru ar 1-like
SS30120VS00	CmoCh08G010240	3.75441	MYB transcription factor
SS3072VS00	CmoCh02G003990	3.75866	isoflavone reductase-like protein
SS3072VS00	CmoCh20G008550	3.76464	isoflavone reductase-like protein
SS30120VS00	CmoCh04G025210	3.77093	wall-associated receptor kinase 2-like
SS30120VS00	CmoCh14G011770	3.7738	Pollen Ole e 1 allergen and extensin family protein
SS3072VS00	CmoCh06G006930	3.7758	caffeic acid 3-O-methyltransferase-like
SS30120VS00	CmoCh04G011070	3.77592	RING-type E3 ubiquitin transferase
SS30120VS00	CmoCh08G007230	3.77603	60S ribosomal protein L28-2 isoform B
SS3072VS00	CmoCh13G007100	3.78029	Receptor-like serine/threonine-protein kinase
SS30120VS00	CmoCh02G004190	3.78125	Non-symbiotic hemoglobin, putative
SS3012VS00	CmoCh11G016110	3.78222	Unknown protein
SS3072VS00	CmoCh20G008010	3.7824	auxin-responsive protein SAUR24-like
SS30120VS00	CmoCh16G000880	3.78809	hevamine-A-like
SS3012VS00	CmoCh19G008990	3.79115	glycine-rich protein-like
SS3072VS00	CmoCh12G004610	3.79323	Patatin
SS3072VS00	CmoCh11G011340	3.79427	organ-specific protein S2-like isoform X2
SS30120VS00	CmoCh16G013110	3.79556	Protease inhibitor protein
SS3012VS00	CmoCh04G001640	3.79645	plasma membrane intrinsic protein 1;4
SS30120VS00	CmoCh11G011760	3.79688	Respiratory burst oxidase
SS3072VS00	CmoCh02G004930	3.80048	benzyl alcohol O-benzoyltransferase-like
SS30120VS00	CmoCh01G018860	3.80228	HXXXD-type acyl-transferase family protein
SS3072VS00	CmoCh01G012350	3.80562	Dynein light chain
SS3012VS00	CmoCh13G008170	3.80571	vinorine synthase-like
SS3072VS00	CmoCh11G004430	3.80605	Unknown protein
SS30120VS00	CmoCh04G005800	3.81981	protein BRASSINOSTEROID INSENSITIVE 1-like
SS3072VS00	CmoCh03G000520	3.82473	EGF domain-specific O-linked N-acetylglucosamine transferase-like
SS3072VS00	CmoCh05G012490	3.82522	Ankyrin repeat-containing protein
SS30120VS00	CmoCh16G010120	3.8256	Unknown protein
SS30120VS00	CmoCh06G013300	3.83044	Myb-related transcription factor
SS3012VS00	CmoCh06G003930	3.83097	protein NUCLEAR FUSION DEFECTIVE 4-like
SS3012VS00	CmoCh12G010200	3.83907	(R)-mandelonitrile lyase 1-like
SS3072VS00	CmoCh20G006360	3.84178	cellulose synthase-like protein H1
SS30120VS00	CmoCh13G001280	3.84398	Unknown protein
SS3072VS00	CmoCh03G005680	3.84673	F-box family protein with a domain of unknown function (DUF295)
SS3012VS00	CmoCh08G001640	3.84742	protein LHY-like isoform X1
SS30120VS00	CmoCh19G000650	3.8541	inhibitor of trypsin and hageman factor-like
SS30120VS00	CmoCh16G009470	3.85416	Protease inhibitor protein
SS30120VS00	CmoCh14G002730	3.86016	Fructose-bisphosphate aldolase
SS3072VS00	CmoCh09G011000	3.86059	pathogen-related protein-like
SS3072VS00	CmoCh07G005480	3.86975	Rab family
SS3072VS00	CmoCh08G004970	3.86993	protein BPS1, chloroplastic-like
SS30120VS00	CmoCh10G005760	3.8733	umecyanin-like
SS3072VS00	CmoCh20G000300	3.87802	Unknown protein
SS3012VS00	CmoCh06G007290	3.87946	(-)-germacrene D synthase-like isoform X2
SS30120VS00	CmoCh09G001790	3.88063	cytochrome P450 CYP82D47-like
SS30120VS00	CmoCh03G007570	3.88525	S-adenosyl-L-methionine-dependent methyltransferases superfamily protein
SS30120VS00	CmoCh14G004380	3.88933	BZIP transcription factor family protein
SS30120VS00	CmoCh19G001010	3.89119	transcription factor MYB4-like
SS3012VS00	CmoCh18G005080	3.89718	WRKY domain-containing protein
SS3012VS00	CmoCh19G004740	3.89768	aluminum-activated malate transporter 12-like
SS3072VS00	CmoCh04G025200	3.90297	wall-associated receptor kinase 2-like
SS3072VS00	CmoCh07G005170	3.9055	Unknown protein
SS3072VS00	CmoCh01G018860	3.90865	HXXXD-type acyl-transferase family protein
SS3072VS00	CmoCh05G006980	3.91203	RING-H2 finger protein ATL56-like
SS3072VS00	CmoCh09G000240	3.91872	protein PIN-LIKES 3-like
SS3012VS00	CmoCh20G010060	3.92076	BTB/POZ domain-containing protein
SS3012VS00	CmoCh05G002210	3.92526	Transducin/WD40 repeat-like superfamily protein
SS3072VS00	CmoCh01G018850	3.93007	HXXXD-type acyl-transferase family protein
SS3012VS00	CmoCh11G013960	3.9363	Glycosyltransferase
SS3072VS00	CmoCh14G002730	3.93687	Fructose-bisphosphate aldolase
SS30120VS00	CmoCh14G007400	3.95011	WRKY protein
SS3072VS00	CmoCh18G004480	3.95251	gibberellin 2-beta-dioxygenase-like
SS30120VS00	CmoCh03G009020	3.95533	Phosphoenolpyruvate carboxykinase (ATP)
SS3072VS00	CmoCh12G001380	3.95635	Serine hydroxymethyltransferase
SS3072VS00	CmoCh04G023680	3.95751	CoA ligase
SS3072VS00	CmoCh20G007250	3.9611	Cytokinin riboside 5'-monophosphate phosphoribohydrolase
SS3072VS00	CmoCh05G011100	3.962	F-box protein PP2-B15-like
SS3072VS00	CmoCh10G004710	3.96981	glycine-rich protein DOT1-like
SS3072VS00	CmoCh02G017380	3.97034	3-ketoacyl-CoA thiolase 2, peroxisomal-like
SS30120VS00	CmoCh04G010550	3.97113	MLP-like protein 328
SS3012VS00	CmoCh04G023770	3.97534	protein REVEILLE 1-like isoform X2
SS30120VS00	CmoCh03G006570	3.97769	endochitinase-like
SS3072VS00	CmoCh03G008010	3.97981	Unknown protein
SS30120VS00	CmoCh19G004470	3.98054	expansin-like B1
SS30120VS00	CmoCh12G010430	3.98075	H(+)-exporting diphosphatase
SS30120VS00	CmoCh01G017990	3.98819	17.1 kDa class II heat shock protein-like
SS3072VS00	CmoCh01G010340	3.99124	Alcohol dehydrogenase
SS3012VS00	CmoCh18G012410	3.99661	two-component response regulator ARR14-like
SS3072VS00	CmoCh05G011110	3.99861	F-box protein PP2-B15-like
SS3072VS00	CmoCh01G004070	3.99991	Regulator of Vps4 activity in the MVB pathway protein, putative
SS30120VS00	CmoCh05G001880	4.00215	Calcium-binding EF-hand
SS3072VS00	CmoCh14G009490	4.00277	neuronal acetylcholine receptor subunit alpha-2-like
SS3072VS00	CmoCh15G002370	4.01071	UDP-glycosyltransferase 83A1-like
SS3072VS00	CmoCh04G017070	4.01414	protein NRT1/ PTR FAMILY 4.6-like
SS3012VS00	CmoCh08G003920	4.01443	Glutaredoxin
SS30120VS00	CmoCh02G003850	4.0249	protein CASPARIAN STRIP INTEGRITY FACTOR 2-like isoform X2
SS30120VS00	CmoCh19G005400	4.02726	pathogenesis-related protein 1-like
SS3024VS00	CmoCh15G014720	4.03302	MFS domain-containing protein
SS3072VS00	CmoCh18G006380	4.03656	Unknown protein
SS3072VS00	CmoCh10G001650	4.03834	two-component response regulator ARR5-like
SS3072VS00	CmoCh18G004080	4.04696	WRKY protein
SS3072VS00	CmoCh11G002090	4.05113	respiratory burst oxidase homolog protein A-like
SS3012VS00	CmoCh03G007280	4.053	Zinc finger, B-box
SS3072VS00	CmoCh18G007500	4.05542	cytochrome P450 71B19-like
SS3072VS00	CmoCh02G015010	4.05583	Amp-dependent synthetase and ligase
SS30120VS00	CmoCh13G007100	4.06302	Receptor-like serine/threonine-protein kinase
SS30120VS00	CmoCh07G007410	4.06391	Unknown protein
SS3012VS00	CmoCh19G000680	4.06819	Serine proteinase inhibitor
SS30120VS00	CmoCh18G010850	4.07169	Protein of unknown function (DUF1262)
SS30120VS00	CmoCh04G022550	4.07237	Glutamate decarboxylase
SS3072VS00	CmoCh06G010490	4.07661	WRKY domain-containing protein
SS30120VS00	CmoCh03G007030	4.0779	thiosulfate sulfurtransferase 18-like
SS3072VS00	CmoCh13G006150	4.07814	DUF1685 domain-containing protein
SS3072VS00	CmoCh02G015440	4.0816	Protein of unknown function (DUF1442)
SS3012VS00	CmoCh08G001650	4.082	Unknown protein
SS3012VS00	CmoCh02G002160	4.09125	Unknown protein
SS30120VS00	CmoCh09G008750	4.09225	Unknown protein
SS3072VS00	CmoCh16G002150	4.09958	Unknown protein
SS3072VS00	CmoCh11G019330	4.09959	Wound-responsive family protein
SS3072VS00	CmoCh01G018680	4.09997	Isoaspartyl peptidase/L-asparaginase
SS3072VS00	CmoCh11G005800	4.10218	protein NRT1/ PTR FAMILY 6.2-like
SS3072VS00	CmoCh20G009930	4.10477	cytochrome P450 81D1-like
SS3072VS00	CmoCh02G000640	4.10561	1-aminocyclopropane-1-carboxylate oxidase 1-like
SS3072VS00	CmoCh15G012740	4.10733	Thaumatin-like protein
SS30120VS00	CmoCh02G012530	4.10783	Peroxidase
SS3072VS00	CmoCh04G021390	4.1113	alpha/beta-Hydrolases superfamily protein
SS3072VS00	CmoCh01G016670	4.11519	SKI/DACH domain-containing protein 1
SS3072VS00	CmoCh17G007400	4.12031	actin-related protein 8-like
SS3012VS00	CmoCh01G002480	4.12417	Ribosomal protein
SS3072VS00	CmoCh04G005800	4.13127	protein BRASSINOSTEROID INSENSITIVE 1-like
SS30120VS00	CmoCh10G011970	4.13254	Respiratory burst oxidase
SS3012VS00	CmoCh05G006600	4.13539	Protein kinase domain-containing protein
SS3072VS00	CmoCh11G020520	4.13549	cysteine-rich and transmembrane domain-containing protein A-like
SS3012VS00	CmoCh14G004810	4.13655	remorin 4.1-like
SS3072VS00	CmoCh01G010810	4.13759	GPI-anchored protein LLG1-like
SS3072VS00	CmoCh04G000610	4.13921	cell number regulator 2-like
SS3072VS00	CmoCh01G013700	4.14123	aspartyl protease family protein 2-like
SS3072VS00	CmoCh04G002410	4.15434	Plant protein 1589 of unknown function
SS30120VS00	CmoCh07G007770	4.15642	geranylgeranyl pyrophosphate synthase, chloroplastic
SS3072VS00	CmoCh13G011100	4.15651	ABC transporter B family member 25-like
SS30120VS00	CmoCh20G010190	4.16372	Peroxidase
SS3072VS00	CmoCh07G008790	4.1655	Auxin-responsive protein
SS3072VS00	CmoCh19G002000	4.16576	Glycosyltransferase
SS3072VS00	CmoCh14G000940	4.16812	PAR1 protein
SS3072VS00	CmoCh04G017500	4.17951	NAC domain-containing protein
SS3072VS00	CmoCh11G010690	4.18003	P-loop containing nucleoside triphosphate hydrolases superfamily protein
SS3072VS00	CmoCh14G009390	4.18208	Epoxide hydrolase 2
SS30120VS00	CmoCh13G007140	4.18289	Receptor-like serine/threonine-protein kinase
SS3072VS00	CmoCh17G007070	4.18333	inorganic pyrophosphatase 2
SS3072VS00	CmoCh01G007020	4.18387	Omega-3 fatty acid desaturase
SS3072VS00	CmoCh19G001010	4.18613	transcription factor MYB4-like
SS3072VS00	CmoCh18G007850	4.19447	heme-binding protein 2-like
SS3012VS00	CmoCh18G013300	4.19622	RNA polymerase sigma factor
SS3072VS00	CmoCh08G008470	4.19763	Glycosyltransferase
SS30120VS00	CmoCh14G015670	4.2006	MLP-like protein 34
SS3072VS00	CmoCh19G004030	4.20134	ankyrin repeat-containing protein BDA1-like
SS30120VS00	CmoCh10G012240	4.20355	calmodulin-binding protein 60 A-like
SS3072VS00	CmoCh02G010870	4.20443	Cytochrome p450
SS3072VS00	CmoCh14G004240	4.20473	VQ motif-containing protein 25-like
SS3072VS00	CmoCh17G007880	4.20728	thionin-like protein 2
SS3072VS00	CmoCh12G004800	4.20729	calcium-binding protein H-like isoform X1
SS3072VS00	CmoCh09G001860	4.21059	cytochrome P450 CYP82D47-like
SS30120VS00	CmoCh04G003610	4.21613	Receptor protein kinase, putative
SS3072VS00	CmoCh15G012730	4.21646	Thaumatin-like protein
SS30120VS00	CmoCh15G012740	4.21837	Thaumatin-like protein
SS30120VS00	CmoCh03G012930	4.23012	Glutaredoxin
SS3012VS00	CmoCh16G000730	4.23169	RNA polymerase sigma factor sigE
SS3072VS00	CmoCh20G000430	4.23655	transmembrane protein 45A-like
SS3072VS00	CmoCh20G010650	4.23949	RING-type E3 ubiquitin transferase
SS30120VS00	CmoCh16G011520	4.24037	AAI domain-containing protein
SS30120VS00	CmoCh13G001290	4.2433	metallothionein-like protein LSC54
SS3012VS00	CmoCh04G009350	4.24644	Ty3-gypsy retrotransposon protein
SS3012VS00	CmoCh15G001530	4.25155	Unknown protein
SS30120VS00	CmoCh06G002100	4.25346	Pyruvate decarboxylase
SS3012VS00	CmoCh04G009340	4.25497	Ferric reduction oxidase 7
SS3072VS00	CmoCh01G011770	4.25607	Protein of unknown function, DUF584
SS3012VS00	CmoCh07G001780	4.26516	myb family transcription factor EFM-like isoform X2
SS3012VS00	CmoCh13G011660	4.26553	HTH myb-type domain-containing protein
SS3072VS00	CmoCh04G001050	4.26641	MLP-like protein 328
SS30120VS00	CmoCh15G013850	4.27272	alcohol dehydrogenase-like 4
SS3072VS00	CmoCh02G014510	4.28618	Mannan endo-1,4-beta-mannosidase
SS3072VS00	CmoCh05G000760	4.29702	NADH-ubiquinone reductase complex 1 MLRQ subunit
SS3012VS00	CmoCh18G005060	4.30078	LRR receptor kinase SERK2
SS3072VS00	CmoCh03G002380	4.30589	Cysteine dioxygenase
SS3072VS00	CmoCh11G011760	4.30716	Respiratory burst oxidase
SS30120VS00	CmoCh14G005330	4.31017	Unknown protein
SS30120VS00	CmoCh05G001330	4.31071	Phytosulfokine-beta
SS30120VS00	CmoCh18G011760	4.32177	glutathione S-transferase U10-like
SS30120VS00	CmoCh04G013940	4.32231	sigma factor binding protein 1, chloroplastic-like
SS30120VS00	CmoCh16G011510	4.32403	AAI domain-containing protein
SS30120VS00	CmoCh13G007120	4.33984	Receptor-like serine/threonine-protein kinase
SS3072VS00	CmoCh02G016230	4.34199	Unknown protein
SS3012VS00	CmoCh10G000260	4.34205	BHLH transcription factor
SS30120VS00	CmoCh10G004710	4.34817	glycine-rich protein DOT1-like
SS30120VS00	CmoCh01G003960	4.34976	Unknown protein
SS3072VS00	CmoCh04G013940	4.35471	sigma factor binding protein 1, chloroplastic-like
SS30120VS00	CmoCh13G007070	4.3591	Receptor-like serine/threonine-protein kinase
SS3072VS00	CmoCh14G005840	4.36676	NAC domain-containing protein 100-like
SS3072VS00	CmoCh14G005330	4.36707	Unknown protein
SS3072VS00	CmoCh16G010120	4.37281	Unknown protein
SS3072VS00	CmoCh16G003410	4.37417	Unknown protein
SS3072VS00	CmoCh07G013740	4.37455	EGF domain-specific O-linked N-acetylglucosamine transferase-like
SS30120VS00	CmoCh12G011610	4.37616	VQ domain-containing protein
SS30120VS00	CmoCh09G011070	4.37916	extensin-3-like isoform X1
SS3072VS00	CmoCh14G018460	4.38489	ethylene-responsive transcription factor 1B
SS30120VS00	CmoCh19G009930	4.39123	Wound-responsive family protein
SS3012VS00	CmoCh08G008260	4.39254	S-adenosyl-L-methionine-dependent methyltransferase
SS3012VS00	CmoCh04G010760	4.3959	Encodes a protein whose expression is responsive to nematode infection, putative
SS3072VS00	CmoCh13G007120	4.40311	Receptor-like serine/threonine-protein kinase
SS3012VS00	CmoCh02G009710	4.40568	RING-type E3 ubiquitin transferase
SS3072VS00	CmoCh02G015070	4.4355	remorin-like
SS3072VS00	CmoCh14G007400	4.43868	WRKY protein
SS3072VS00	CmoCh03G007030	4.44483	thiosulfate sulfurtransferase 18-like
SS3072VS00	CmoCh14G018200	4.45427	Proteinase inhibitor
SS3072VS00	CmoCh13G003780	4.45598	NAD(P)-binding Rossmann-fold superfamily protein
SS30120VS00	CmoCh02G006130	4.45614	Patatin
SS3012VS00	CmoCh01G007710	4.46475	root phototropism protein 2
SS3072VS00	CmoCh04G027180	4.47103	Unknown protein
SS3072VS00	CmoCh05G004310	4.47752	ankyrin repeat-containing protein ITN1-like
SS30120VS00	CmoCh10G008490	4.47989	(1->3)-beta-glucan endohydrolase
SS3072VS00	CmoCh03G010440	4.48534	serine/threonine-protein kinase PBS1-like
SS3024VS00	CmoCh08G012220	4.49129	major allergen Pru ar 1-like
SS30120VS00	CmoCh11G019330	4.49229	Wound-responsive family protein
SS3072VS00	CmoCh04G003610	4.49597	Receptor protein kinase, putative
SS30120VS00	CmoCh15G012730	4.49962	Thaumatin-like protein
SS3072VS00	CmoCh06G006990	4.50357	caffeic acid 3-O-methyltransferase-like
SS3072VS00	CmoCh16G011520	4.50666	AAI domain-containing protein
SS3072VS00	CmoCh10G005750	4.50863	cucumber peeling cupredoxin-like
SS30120VS00	CmoCh11G013960	4.50996	Glycosyltransferase
SS3072VS00	CmoCh10G008490	4.51056	(1->3)-beta-glucan endohydrolase
SS3012VS00	CmoCh03G001830	4.51814	Unknown protein
SS30120VS00	CmoCh14G010350	4.52067	cytochrome P450 705A22-like
SS3072VS00	CmoCh11G015780	4.52504	mitochondrial phosphate carrier protein 3, mitochondrial-like
SS3072VS00	CmoCh06G011640	4.5279	S-adenosyl-L-methionine-dependent methyltransferase
SS30120VS00	CmoCh07G000570	4.52831	Germin-like protein
SS3072VS00	CmoCh11G006400	4.5326	E3 ubiquitin-protein ligase ATL42-like
SS3072VS00	CmoCh09G011070	4.54326	extensin-3-like isoform X1
SS30120VS00	CmoCh19G000800	4.54968	Unknown protein
SS3072VS00	CmoCh15G000180	4.55464	PPM-type phosphatase domain-containing protein
SS30120VS00	CmoCh11G013370	4.5562	Peroxidase
SS3012VS00	CmoCh18G004690	4.55778	phospholipase A1-Igamma1, chloroplastic-like
SS3012VS00	CmoCh04G006730	4.55898	Phytoene synthase
SS30120VS00	CmoCh17G007880	4.56684	thionin-like protein 2
SS3072VS00	CmoCh19G009930	4.57364	Wound-responsive family protein
SS3072VS00	CmoCh05G011250	4.57421	Lipoxygenase
SS3012VS00	CmoCh01G008110	4.58062	protein REVEILLE 7-like
SS3072VS00	CmoCh12G011610	4.58835	VQ domain-containing protein
SS3072VS00	CmoCh03G006570	4.59873	endochitinase-like
SS3012VS00	CmoCh02G005240	4.59922	BTB/POZ domain-containing protein
SS3072VS00	CmoCh04G000970	4.59923	WRKY transcription factor 55
SS3072VS00	CmoCh04G011070	4.60412	RING-type E3 ubiquitin transferase
SS3072VS00	CmoCh04G002510	4.60523	Exocyst subunit Exo70 family protein
SS30120VS00	CmoCh04G010760	4.60926	Encodes a protein whose expression is responsive to nematode infection, putative
SS3024VS00	CmoCh05G012410	4.61607	F-box protein At3g08750-like
SS3012VS00	CmoCh11G004290	4.62738	WAT1-related protein
SS3072VS00	CmoCh20G003310	4.63081	trans-cinnamate 4-monooxygenase-like
SS3072VS00	CmoCh12G006800	4.63558	phosphate transporter PHO1 homolog 3-like
SS3072VS00	CmoCh11G013370	4.63651	Peroxidase
SS3012VS00	CmoCh20G010320	4.63783	NAC domain-containing protein
SS3012VS00	CmoCh03G007580	4.63983	S-adenosyl-L-methionine-dependent methyltransferases superfamily protein
SS30120VS00	CmoCh04G002510	4.64389	Exocyst subunit Exo70 family protein
SS3012VS00	CmoCh14G017840	4.64676	early light-induced protein 1, chloroplastic-like
SS3072VS00	CmoCh10G005840	4.64816	EIN3-binding F-box protein 1-like
SS3072VS00	CmoCh16G000230	4.65022	Unknown protein
SS30120VS00	CmoCh05G004350	4.65034	WRKY domain-containing protein
SS3072VS00	CmoCh11G005090	4.65186	EamA domain-containing protein
SS3072VS00	CmoCh10G012340	4.65511	calmodulin-binding protein 60 A-like isoform X2
SS3072VS00	CmoCh17G009910	4.66194	transcription factor JAMYB-like
SS3072VS00	CmoCh05G007130	4.66489	(R)-mandelonitrile lyase 1-like
SS3012VS00	CmoCh08G009230	4.66555	protein transport Sec1a-like
SS3072VS00	CmoCh15G014860	4.67469	LRR receptor-like serine/threonine-protein kinase GSO1
SS30120VS00	CmoCh01G010360	4.67524	Alcohol dehydrogenase
SS3072VS00	CmoCh16G011940	4.68492	HMA domain-containing protein
SS3072VS00	CmoCh04G015120	4.6853	cucumisin-like
SS3072VS00	CmoCh20G009870	4.68877	cytochrome P450 81D11-like
SS3072VS00	CmoCh14G020770	4.68919	BON1-associated protein 2-like
SS3012VS00	CmoCh06G013820	4.70025	early light-induced protein 1, chloroplastic-like
SS30120VS00	CmoCh10G009940	4.71812	beta-glucosidase 12-like
SS3072VS00	CmoCh08G007230	4.72795	60S ribosomal protein L28-2 isoform B
SS30120VS00	CmoCh11G013380	4.72901	Peroxidase
SS30120VS00	CmoCh11G010690	4.7382	P-loop containing nucleoside triphosphate hydrolases superfamily protein
SS3072VS00	CmoCh17G002330	4.75164	sugar transport protein 13-like
SS3072VS00	CmoCh03G004560	4.75281	zinc finger protein ZAT11-like
SS3072VS00	CmoCh07G012880	4.76816	macrophage migration inhibitory factor homolog
SS3012VS00	CmoCh02G003850	4.77602	protein CASPARIAN STRIP INTEGRITY FACTOR 2-like isoform X2
SS30120VS00	CmoCh13G011100	4.77907	ABC transporter B family member 25-like
SS30120VS00	CmoCh04G025710	4.77937	ethylene-responsive transcription factor ERF110-like
SS3012VS00	CmoCh02G009310	4.78322	Glutaredoxin domain-containing protein
SS3072VS00	CmoCh17G000580	4.78326	RING-type E3 ubiquitin transferase
SS3012VS00	CmoCh12G000260	4.78674	Reverse transcriptase
SS30120VS00	CmoCh15G004070	4.78936	CASP-like protein
SS30120VS00	CmoCh04G013360	4.80237	GRAM domain-containing protein
SS30120VS00	CmoCh11G002830	4.81229	transcription factor JAMYB-like
SS3072VS00	CmoCh15G011220	4.81389	heavy metal-associated isoprenylated plant protein 39-like
SS3072VS00	CmoCh04G025540	4.82198	extensin-like
SS3072VS00	CmoCh06G009970	4.82435	Phosphoglycerate mutase family protein
SS3072VS00	CmoCh10G012240	4.82854	calmodulin-binding protein 60 A-like
SS30120VS00	CmoCh14G018200	4.83488	Proteinase inhibitor
SS30120VS00	CmoCh09G010550	4.837	Calcium-binding EF-hand family protein
SS30120VS00	CmoCh20G003430	4.83876	Peroxidase
SS3072VS00	CmoCh04G013960	4.85144	auxin-regulated gene involved in organ size
SS3072VS00	CmoCh17G009100	4.85334	Unknown protein
SS3072VS00	CmoCh05G007700	4.85655	cytochrome P450 CYP73A100-like
SS3072VS00	CmoCh12G012490	4.86058	early nodulin-93-like
SS3072VS00	CmoCh16G001570	4.8731	two-component response regulator ARR14-like
SS3072VS00	CmoCh01G012480	4.87515	NAC domain-containing protein
SS3012VS00	CmoCh15G004330	4.87629	Dirigent protein
SS30120VS00	CmoCh09G001800	4.87717	cytochrome P450 CYP82D47-like
SS30120VS00	CmoCh19G003620	4.87726	Pectin lyase-like superfamily protein
SS30120VS00	CmoCh05G005950	4.87776	sucrose transport protein SUC4 isoform X2
SS3072VS00	CmoCh11G013380	4.88035	Peroxidase
SS3072VS00	CmoCh11G004290	4.89292	WAT1-related protein
SS3072VS00	CmoCh08G008390	4.89884	Glycosyltransferase
SS3072VS00	CmoCh01G010360	4.9051	Alcohol dehydrogenase
SS30120VS00	CmoCh11G011340	4.90834	organ-specific protein S2-like isoform X2
SS3072VS00	CmoCh09G001790	4.90837	cytochrome P450 CYP82D47-like
SS30120VS00	CmoCh17G000580	4.92308	RING-type E3 ubiquitin transferase
SS3012VS00	CmoCh01G002260	4.93757	cytochrome P450 705A22-like
SS30120VS00	CmoCh17G005440	4.9419	O-methyltransferase family protein
SS30120VS00	CmoCh18G008020	4.94972	proline-rich receptor-like protein kinase PERK13
SS30120VS00	CmoCh17G011110	4.95119	glutamic acid-rich protein
SS3072VS00	CmoCh06G013700	4.96002	Calmodulin
SS30120VS00	CmoCh08G001560	4.96075	SPX domain-containing protein
SS30120VS00	CmoCh14G018450	4.97142	ethylene-responsive transcription factor ERF098-like
SS3072VS00	CmoCh12G010430	4.97376	H(+)-exporting diphosphatase
SS30120VS00	CmoCh06G011640	4.98529	S-adenosyl-L-methionine-dependent methyltransferase
SS3072VS00	CmoCh02G012520	4.98885	Peroxidase
SS30120VS00	CmoCh09G010720	4.98967	Chitin synthase 2
SS3072VS00	CmoCh07G002170	4.99456	NAC domain-containing protein 73-like
SS3072VS00	CmoCh01G008880	4.99538	Ankyrin repeat-containing protein
SS30120VS00	CmoCh14G018470	4.99619	Inorganic phosphate transporter 1-1
SS3072VS00	CmoCh13G006770	5.00434	polyphenol oxidase, chloroplastic-like
SS3072VS00	CmoCh07G000560	5.00856	Germin-like protein
SS3072VS00	CmoCh17G007590	5.01147	protein PLANT CADMIUM RESISTANCE 8
SS3072VS00	CmoCh02G005390	5.02336	VQ domain-containing protein
SS3072VS00	CmoCh15G008120	5.02428	Calcium-transporting ATPase
SS30120VS00	CmoCh16G003410	5.07453	Unknown protein
SS30120VS00	CmoCh17G008210	5.07461	DUF761 domain-containing protein
SS30120VS00	CmoCh18G004080	5.07744	WRKY protein
SS3072VS00	CmoCh05G006880	5.07767	Unknown protein
SS3072VS00	CmoCh11G009910	5.07941	L-allo-threonine aldolase
SS3072VS00	CmoCh04G020360	5.08211	calmodulin-like
SS30120VS00	CmoCh14G002310	5.10973	thaumatin-like protein 1b
SS3072VS00	CmoCh07G009860	5.11439	floral homeotic protein APETALA 2-like
SS3072VS00	CmoCh05G001330	5.1205	Phytosulfokine-beta
SS30120VS00	CmoCh18G004980	5.12146	FAD-binding Berberine family protein
SS3072VS00	CmoCh16G001310	5.12234	Actin depolymerizing factor, putative
SS3072VS00	CmoCh17G001160	5.12411	vesicle-associated membrane protein 722-like
SS30120VS00	CmoCh06G009970	5.12731	Phosphoglycerate mutase family protein
SS30120VS00	CmoCh20G009870	5.13288	cytochrome P450 81D11-like
SS3072VS00	CmoCh20G010320	5.14295	NAC domain-containing protein
SS3072VS00	CmoCh02G009980	5.15236	Pectinesterase
SS3072VS00	CmoCh03G001710	5.19469	Methyltransf_11 domain-containing protein
SS3072VS00	CmoCh09G010550	5.20119	Calcium-binding EF-hand family protein
SS3072VS00	CmoCh12G011370	5.20268	Calcium-transporting ATPase
SS30120VS00	CmoCh10G008480	5.22502	(1->3)-beta-glucan endohydrolase
SS3072VS00	CmoCh03G009020	5.23727	Phosphoenolpyruvate carboxykinase (ATP)
SS30120VS00	CmoCh11G009720	5.23846	Germin-like protein
SS3072VS00	CmoCh08G004800	5.24111	MYB transcription factor
SS30120VS00	CmoCh12G012490	5.24443	early nodulin-93-like
SS30120VS00	CmoCh18G007850	5.24712	heme-binding protein 2-like
SS30120VS00	CmoCh09G002630	5.24836	Cytochrome P450
SS3072VS00	CmoCh14G010740	5.26764	cinnamoyl coa reductase
SS3072VS00	CmoCh04G025210	5.27004	wall-associated receptor kinase 2-like
SS3072VS00	CmoCh09G008740	5.27246	NAC domain protein
SS3024VS00	CmoCh11G013940	5.27329	Glycosyltransferase
SS30120VS00	CmoCh02G007260	5.28305	LOB domain-containing protein
SS30120VS00	CmoCh07G004700	5.28911	heavy metal-associated isoprenylated plant protein 43-like
SS30120VS00	CmoCh11G003940	5.29106	DUF761 domain-containing protein
SS3072VS00	CmoCh18G004980	5.30557	FAD-binding Berberine family protein
SS30120VS00	CmoCh19G009610	5.31531	cysteine-rich repeat secretory protein 38-like
SS3072VS00	CmoCh08G010620	5.31935	ethylene-responsive transcription factor 1B-like
SS3072VS00	CmoCh15G000470	5.32447	LL-diaminopimelate aminotransferase
SS30120VS00	CmoCh02G016420	5.32487	beta-amyrin 11-oxidase-like
SS30120VS00	CmoCh14G009730	5.33401	Pectin lyase-like superfamily protein
SS30120VS00	CmoCh06G006980	5.33636	caffeic acid 3-O-methyltransferase-like
SS3072VS00	CmoCh03G010450	5.33685	WRKY DNA-binding protein 51, putative
SS3024VS00	CmoCh14G008620	5.351	MLP-like protein 34
SS3012VS00	CmoCh14G001940	5.35772	transcription initiation factor TFIID subunit 7-like
SS3072VS00	CmoCh04G022560	5.37023	DUF629 domain-containing protein
SS3012VS00	CmoCh01G008290	5.37209	cyclic dof factor 1-like
SS3012VS00	CmoCh13G007130	5.37248	Receptor-like serine/threonine-protein kinase
SS30120VS00	CmoCh10G012220	5.38285	calmodulin-binding protein 60 G-like isoform X1
SS30120VS00	CmoCh04G020380	5.39412	calmodulin-like
SS30120VS00	CmoCh06G011760	5.39727	Pectinesterase
SS3072VS00	CmoCh11G016070	5.40008	WRKY protein
SS3072VS00	CmoCh15G005930	5.41019	ethylene-responsive transcription factor ERF110-like
SS3072VS00	CmoCh02G007260	5.42441	LOB domain-containing protein
SS3072VS00	CmoCh04G022550	5.44601	Glutamate decarboxylase
SS30120VS00	CmoCh15G006170	5.46499	extensin-like
SS30120VS00	CmoCh18G001080	5.47322	GTD-binding domain-containing protein
SS3012VS00	CmoCh01G003760	5.47712	Major latex-like protein
SS3072VS00	CmoCh04G010760	5.48864	Encodes a protein whose expression is responsive to nematode infection, putative
SS3072VS00	CmoCh15G004470	5.49049	Unknown protein
SS3072VS00	CmoCh16G013140	5.49377	Protease inhibitor protein
SS3072VS00	CmoCh14G018450	5.50898	ethylene-responsive transcription factor ERF098-like
SS3072VS00	CmoCh14G006750	5.50948	Pectin lyase-like superfamily protein
SS30120VS00	CmoCh20G011330	5.52342	ethylene-responsive transcription factor ERF110-like
SS30120VS00	CmoCh03G009450	5.53069	VQ domain-containing protein
SS3012VS00	CmoCh11G013610	5.54047	abscisic acid 8'-hydroxylase 4-like
SS3072VS00	CmoCh03G006590	5.54339	endochitinase-like
SS30120VS00	CmoCh19G005380	5.56901	Pathogenesis-related protein-1-like protein
SS3072VS00	CmoCh14G000060	5.56978	Protein of unknown function, DUF599
SS3072VS00	CmoCh07G002420	5.57017	heat stress transcription factor B-2a-like
SS3012VS00	CmoCh04G029230	5.57516	UPF0301 protein
SS3072VS00	CmoCh16G009340	5.58197	lactoylglutathione lyase-like
SS3012VS00	CmoCh13G011920	5.58584	cyclic dof factor 3-like
SS30120VS00	CmoCh16G004050	5.5867	glutelin type-B 2-like
SS3072VS00	CmoCh08G010590	5.59292	MYB transcription factor
SS3072VS00	CmoCh14G002310	5.59366	thaumatin-like protein 1b
SS30120VS00	CmoCh12G006800	5.62175	phosphate transporter PHO1 homolog 3-like
SS30120VS00	CmoCh08G010590	5.64102	MYB transcription factor
SS3072VS00	CmoCh20G006140	5.64413	Isocitrate lyase
SS30120VS00	CmoCh07G005240	5.65203	L-ascorbate oxidase
SS30120VS00	CmoCh13G006770	5.6571	polyphenol oxidase, chloroplastic-like
SS30120VS00	CmoCh03G006590	5.659	endochitinase-like
SS3072VS00	CmoCh03G007570	5.66156	S-adenosyl-L-methionine-dependent methyltransferases superfamily protein
SS3072VS00	CmoCh13G007070	5.66943	Receptor-like serine/threonine-protein kinase
SS30120VS00	CmoCh17G009160	5.67794	cytochrome P450 705A22-like
SS3072VS00	CmoCh17G007230	5.68246	(thale cress) hypothetical protein
SS3072VS00	CmoCh18G004990	5.69454	Berberine bridge enzyme-like
SS3072VS00	CmoCh10G005760	5.70776	umecyanin-like
SS3072VS00	CmoCh09G002630	5.72813	Cytochrome P450
SS30120VS00	CmoCh13G005180	5.73701	Pectinesterase
SS3072VS00	CmoCh02G017950	5.74522	ethylene-responsive transcription factor 1B-like
SS3072VS00	CmoCh06G011760	5.75356	Pectinesterase
SS3072VS00	CmoCh18G010850	5.76286	Protein of unknown function (DUF1262)
SS3012VS00	CmoCh19G000730	5.77043	Serine proteinase inhibitor
SS3072VS00	CmoCh06G002100	5.77481	Pyruvate decarboxylase
SS30120VS00	CmoCh02G000190	5.7758	transcription factor JUNGBRUNNEN 1-like
SS30120VS00	CmoCh01G003770	5.78162	MLP-like protein 34
SS3072VS00	CmoCh09G001800	5.78527	cytochrome P450 CYP82D47-like
SS3012VS00	CmoCh09G010610	5.79108	cysteine proteinase inhibitor 8-like
SS3012VS00	CmoCh14G011660	5.79643	zinc finger protein CONSTANS-LIKE 2-like
SS3072VS00	CmoCh18G005030	5.82317	berberine bridge enzyme-like 18
SS3072VS00	CmoCh13G007130	5.85089	Receptor-like serine/threonine-protein kinase
SS3072VS00	CmoCh12G000640	5.85354	Heat shock protein DnaJ, cysteine-rich domain containing protein
SS3072VS00	CmoCh15G010610	5.86497	Unknown protein
SS30120VS00	CmoCh11G007100	5.86717	Cytokinin dehydrogenase
SS3072VS00	CmoCh07G012240	5.87716	RING-type E3 ubiquitin transferase
SS3072VS00	CmoCh06G011270	5.90885	BON1-associated protein 2-like
SS30120VS00	CmoCh14G004310	5.91218	Myb family transcription factor family protein
SS3072VS00	CmoCh01G007310	5.94681	cation/H(+) antiporter 24-like
SS3012VS00	CmoCh01G004710	5.9505	zinc finger protein CONSTANS-LIKE 2-like
SS30120VS00	CmoCh03G004210	5.95233	Cysteine/Histidine-rich C1 domain family protein
SS3072VS00	CmoCh10G012220	5.95746	calmodulin-binding protein 60 G-like isoform X1
SS30120VS00	CmoCh04G026840	5.96968	Amino acid transporter, putative
SS3012VS00	CmoCh11G003960	5.97083	zinc finger protein 2-like
SS3012VS00	CmoCh17G005320	5.98401	protein LHY isoform X1
SS3072VS00	CmoCh16G003370	5.99738	Unknown protein
SS30120VS00	CmoCh13G007130	6.02249	Receptor-like serine/threonine-protein kinase
SS30120VS00	CmoCh09G011120	6.02597	extensin-1-like
SS30120VS00	CmoCh11G013940	6.02641	Glycosyltransferase
SS3072VS00	CmoCh14G018210	6.02723	Inhibitor of trypsin and hageman factor-like
SS30120VS00	CmoCh18G004990	6.03258	Berberine bridge enzyme-like
SS30120VS00	CmoCh08G000170	6.0439	leucine-rich repeat protein 1-like
SS3072VS00	CmoCh15G015080	6.05449	WAT1-related protein
SS30120VS00	CmoCh15G011930	6.0562	14 kDa proline-rich protein DC2.15-like
SS3072VS00	CmoCh05G012280	6.06099	pathogenesis-related protein PR-4-like
SS3072VS00	CmoCh20G002930	6.11682	transcription factor JUNGBRUNNEN 1-like
SS3072VS00	CmoCh14G018510	6.1225	Myb-related transcription factor
SS3012VS00	CmoCh09G005060	6.1444	Cryptochrome DASH
SS3072VS00	CmoCh19G000800	6.1485	Unknown protein
SS3072VS00	CmoCh01G005940	6.16097	zinc finger protein ZAT12-like isoform X1
SS3072VS00	CmoCh11G003940	6.16835	DUF761 domain-containing protein
SS30120VS00	CmoCh10G010930	6.1821	Germin-like protein
SS3072VS00	CmoCh20G009940	6.20325	cytochrome P450 81D1-like
SS3072VS00	CmoCh17G011110	6.20417	glutamic acid-rich protein
SS30120VS00	CmoCh04G001050	6.21784	MLP-like protein 328
SS30120VS00	CmoCh14G013410	6.22963	rop guanine nucleotide exchange factor 12
SS3072VS00	CmoCh03G009450	6.26435	VQ domain-containing protein
SS3072VS00	CmoCh19G005400	6.26488	pathogenesis-related protein 1-like
SS30120VS00	CmoCh07G006450	6.26939	Uncharacterised conserved protein UCP031279
SS3072VS00	CmoCh19G004040	6.27035	ankyrin repeat-containing protein BDA1-like
SS3072VS00	CmoCh14G003470	6.27334	NDR1/HIN1-like protein 10
SS3072VS00	CmoCh07G004700	6.29994	heavy metal-associated isoprenylated plant protein 43-like
SS30120VS00	CmoCh19G000810	6.30192	Unknown protein
SS30120VS00	CmoCh07G000560	6.31244	Germin-like protein
SS30120VS00	CmoCh03G000730	6.31325	Loricrin-like
SS30120VS00	CmoCh05G012280	6.31899	pathogenesis-related protein PR-4-like
SS3072VS00	CmoCh20G003430	6.33537	Peroxidase
SS30120VS00	CmoCh12G013420	6.33883	Acco20
SS3072VS00	CmoCh09G010140	6.33988	kiwellin-like
SS30120VS00	CmoCh14G010160	6.34989	polygalacturonase
SS3072VS00	CmoCh04G027630	6.38317	CASP-like protein
SS3072VS00	CmoCh06G006980	6.38531	caffeic acid 3-O-methyltransferase-like
SS3072VS00	CmoCh14G009730	6.38825	Pectin lyase-like superfamily protein
SS3072VS00	CmoCh04G013360	6.40633	GRAM domain-containing protein
SS30120VS00	CmoCh18G005010	6.40894	berberine bridge enzyme-like 18
SS3072VS00	CmoCh08G003750	6.4143	Glutamic acid-rich protein
SS3012VS00	CmoCh19G000740	6.41616	Pumpkin fruit trypsin inhibitor
SS30120VS00	CmoCh05G000500	6.44413	2-oxoglutarate (2OG) and Fe(II)-dependent oxygenase superfamily protein
SS3024VS00	CmoCh01G008880	6.48351	Ankyrin repeat-containing protein
SS3072VS00	CmoCh04G020320	6.50075	calmodulin-like
SS30120VS00	CmoCh14G008620	6.50204	MLP-like protein 34
SS3072VS00	CmoCh06G007800	6.50683	auxin-responsive protein SAUR36-like
SS3072VS00	CmoCh04G028630	6.51905	metalloendoproteinase 2-MMP-like
SS3012VS00	CmoCh11G007100	6.5194	Cytokinin dehydrogenase
SS3072VS00	CmoCh15G006170	6.52195	extensin-like
SS30120VS00	CmoCh04G020370	6.53741	calmodulin-like
SS3072VS00	CmoCh10G008480	6.53768	(1->3)-beta-glucan endohydrolase
SS3072VS00	CmoCh17G008210	6.54854	DUF761 domain-containing protein
SS3072VS00	CmoCh10G009940	6.55543	beta-glucosidase 12-like
SS30120VS00	CmoCh09G010680	6.57779	Unknown protein
SS3072VS00	CmoCh03G012930	6.5974	Glutaredoxin
SS30120VS00	CmoCh17G000130	6.59783	LysM domain-containing protein
SS30120VS00	CmoCh02G009980	6.60351	Pectinesterase
SS3072VS00	CmoCh11G018650	6.60426	Calcium-binding EF-hand family protein
SS30120VS00	CmoCh03G002540	6.61384	spermidine hydroxycinnamoyl transferase-like
SS3072VS00	CmoCh05G012270	6.6269	pathogenesis-related protein PR-4-like
SS30120VS00	CmoCh14G006750	6.64735	Pectin lyase-like superfamily protein
SS30120VS00	CmoCh19G005460	6.6581	pathogenesis-related protein 1-like
SS3072VS00	CmoCh19G009610	6.6606	cysteine-rich repeat secretory protein 38-like
SS3072VS00	CmoCh19G000660	6.66386	Pumpkin fruit trypsin inhibitor
SS30120VS00	CmoCh05G011250	6.70553	Lipoxygenase
SS30120VS00	CmoCh11G018650	6.72322	Calcium-binding EF-hand family protein
SS3012VS00	CmoCh14G008600	6.7307	Major latex-like protein
SS3012VS00	CmoCh14G001730	6.73847	protein REVEILLE 8 isoform X2
SS3072VS00	CmoCh07G005240	6.7403	L-ascorbate oxidase
SS3012VS00	CmoCh08G005780	6.78302	shikimate O-hydroxycinnamoyltransferase-like
SS3072VS00	CmoCh11G007020	6.79833	GATA transcription factor 21-like
SS3072VS00	CmoCh14G012410	6.80101	GDSL esterase/lipase 1-like
SS3072VS00	CmoCh11G002830	6.80819	transcription factor JAMYB-like
SS30120VS00	CmoCh16G013130	6.81285	Proteinase inhibitor
SS3024VS00	CmoCh12G005950	6.82187	Unknown protein
SS30120VS00	CmoCh01G011980	6.86108	Lysine-specific demethylase
SS30120VS00	CmoCh20G001830	6.87146	protein ABSCISIC ACID-INSENSITIVE 5-like
SS3072VS00	CmoCh01G002260	6.90655	cytochrome P450 705A22-like
SS3072VS00	CmoCh11G007100	6.92568	Cytokinin dehydrogenase
SS3072VS00	CmoCh11G019340	6.93217	Wound-responsive family protein
SS3072VS00	CmoCh11G013940	6.93833	Glycosyltransferase
SS3012VS00	CmoCh07G004200	6.96261	thaumatin-like protein 1b
SS3012VS00	CmoCh04G002460	6.99886	Dirigent protein
SS30120VS00	CmoCh04G027630	7.01206	CASP-like protein
SS3072VS00	CmoCh05G001820	7.01657	Glutamate receptor 2.5-like isoform X1
SS30120VS00	CmoCh19G002610	7.01966	Glycosyltransferase
SS3072VS00	CmoCh12G013420	7.04602	Acco20
SS3072VS00	CmoCh04G025710	7.05861	ethylene-responsive transcription factor ERF110-like
SS3072VS00	CmoCh15G004070	7.05934	CASP-like protein
SS3072VS00	CmoCh04G005720	7.08721	cucumisin-like
SS3012VS00	CmoCh10G001830	7.11353	protein NUCLEAR FUSION DEFECTIVE 4-like
SS3072VS00	CmoCh14G006450	7.11587	alpha-dioxygenase 1
SS3072VS00	CmoCh19G000810	7.11897	Unknown protein
SS30120VS00	CmoCh05G001820	7.13273	Glutamate receptor 2.5-like isoform X1
SS3072VS00	CmoCh04G030030	7.16594	HIG1 domain-containing protein
SS3072VS00	CmoCh19G000830	7.17597	Unknown protein
SS30120VS00	CmoCh04G013610	7.18495	mediator of RNA polymerase II transcription subunit 15a-like
SS30120VS00	CmoCh19G005870	7.18921	Plant basic secretory protein (BSP) family protein
SS3072VS00	CmoCh04G020340	7.19218	calmodulin-2/4-like
SS30120VS00	CmoCh09G010140	7.19738	kiwellin-like
SS30120VS00	CmoCh16G003400	7.21097	Trypsin inhibitor 1-like
SS3024VS00	CmoCh02G014330	7.21382	Unknown protein
SS3012VS00	CmoCh14G008620	7.21721	MLP-like protein 34
SS3072VS00	CmoCh04G011740	7.21799	Protein-serine/threonine phosphatase
SS3072VS00	CmoCh03G000730	7.24497	Loricrin-like
SS3072VS00	CmoCh20G011330	7.25452	ethylene-responsive transcription factor ERF110-like
SS30120VS00	CmoCh14G003370	7.26077	HVA22-like protein
SS3072VS00	CmoCh14G010160	7.26461	polygalacturonase
SS3072VS00	CmoCh20G007570	7.27628	Rhodanese domain-containing protein
SS30120VS00	CmoCh14G018210	7.29573	Inhibitor of trypsin and hageman factor-like
SS3072VS00	CmoCh14G018220	7.31452	Inhibitor of trypsin and hageman factor-like
SS30120VS00	CmoCh16G002140	7.3164	Unknown protein
SS3012VS00	CmoCh19G002380	7.34779	Myb transcription factor
SS30120VS00	CmoCh11G018910	7.34885	S-type anion channel SLAH1-like
SS3072VS00	CmoCh14G004310	7.35157	Myb family transcription factor family protein
SS3072VS00	CmoCh14G002230	7.35987	Carbonic anhydrase
SS30120VS00	CmoCh08G010630	7.36249	ethylene-responsive transcription factor ERF098-like
SS3072VS00	CmoCh19G005420	7.40541	pathogenesis-related protein 1-like
SS3024VS00	CmoCh19G002380	7.42131	Myb transcription factor
SS3072VS00	CmoCh13G005060	7.43579	berberine bridge enzyme-like 15
SS3072VS00	CmoCh04G016170	7.44194	protein MIZU-KUSSEI 1-like
SS30120VS00	CmoCh06G000790	7.45857	bZIP transcription factor TGA10-like
SS30120VS00	CmoCh05G013580	7.47998	protein SPEAR1-like
SS30120VS00	CmoCh16G003370	7.48376	Unknown protein
SS3072VS00	CmoCh05G004350	7.50115	WRKY domain-containing protein
SS3072VS00	CmoCh18G003330	7.5069	TIR domain-containing protein
SS3012VS00	CmoCh04G006740	7.5226	Unknown protein
SS30120VS00	CmoCh20G002930	7.5316	transcription factor JUNGBRUNNEN 1-like
SS30120VS00	CmoCh19G005410	7.53753	Pathogenesis-related protein 1
SS3072VS00	CmoCh14G002380	7.55121	2-oxoglutarate (2OG) and Fe(II)-dependent oxygenase superfamily protein
SS3012VS00	CmoCh11G018560	7.55402	cold and drought-regulated protein CORA-like
SS3072VS00	CmoCh01G009580	7.56271	ethylene-responsive transcription factor ABR1-like
SS30120VS00	CmoCh04G030030	7.57225	HIG1 domain-containing protein
SS30120VS00	CmoCh19G010310	7.58218	Diacylglycerol O-acyltransferase
SS30120VS00	CmoCh20G007570	7.59675	Rhodanese domain-containing protein
SS3072VS00	CmoCh18G010230	7.61365	VQ motif-containing protein 8
SS3012VS00	CmoCh14G018450	7.61899	ethylene-responsive transcription factor ERF098-like
SS30120VS00	CmoCh13G008170	7.6199	vinorine synthase-like
SS30120VS00	CmoCh11G005710	7.64098	Lactoylglutathione lyase / glyoxalase I family protein
SS3072VS00	CmoCh11G018910	7.65511	S-type anion channel SLAH1-like
SS30120VS00	CmoCh05G012270	7.70526	pathogenesis-related protein PR-4-like
SS3072VS00	CmoCh17G004330	7.70752	1-aminocyclopropane-1-carboxylate synthase 1
SS30120VS00	CmoCh08G012220	7.72283	major allergen Pru ar 1-like
SS3072VS00	CmoCh01G003800	7.80056	C2 domain-containing protein
SS30120VS00	CmoCh05G012190	7.80584	calmodulin-like protein 8
SS30120VS00	CmoCh07G000550	7.81951	Germin-like protein
SS3072VS00	CmoCh04G016180	7.83228	Protein IDA-like
SS30120VS00	CmoCh18G005030	7.87696	berberine bridge enzyme-like 18
SS30120VS00	CmoCh19G002890	7.88554	Thaumatin-like protein
SS3072VS00	CmoCh14G013410	7.89138	rop guanine nucleotide exchange factor 12
SS30120VS00	CmoCh06G006460	7.92712	Unknown protein
SS30120VS00	CmoCh18G005020	7.95408	berberine bridge enzyme-like 18
SS3072VS00	CmoCh04G005520	7.95659	basic blue protein-like
SS30120VS00	CmoCh16G013140	7.96914	Protease inhibitor protein
SS3072VS00	CmoCh04G022620	8.0136	defensin Ec-AMP-D2-like
SS30120VS00	CmoCh19G000660	8.07577	Pumpkin fruit trypsin inhibitor
SS3024VS00	CmoCh19G000740	8.08771	Pumpkin fruit trypsin inhibitor
SS30120VS00	CmoCh04G005520	8.12532	basic blue protein-like
SS3072VS00	CmoCh17G000130	8.16313	LysM domain-containing protein
SS3072VS00	CmoCh04G020380	8.16803	calmodulin-like
SS3072VS00	CmoCh02G016140	8.19039	expansin-like B1
SS30120VS00	CmoCh15G006150	8.234	Unknown protein
SS3072VS00	CmoCh16G002140	8.24836	Unknown protein
SS3072VS00	CmoCh19G007930	8.25214	expansin-like A2
SS3072VS00	CmoCh11G014930	8.2978	chaperone protein dnaJ 20, chloroplastic-like
SS3072VS00	CmoCh19G004470	8.31219	expansin-like B1
SS3012VS00	CmoCh11G011620	8.31728	root phototropism protein 3-like isoform X1
SS3072VS00	CmoCh13G009740	8.37127	Unknown protein
SS3072VS00	CmoCh03G002540	8.39172	spermidine hydroxycinnamoyl transferase-like
SS30120VS00	CmoCh15G009030	8.40201	defensin-like protein 1
SS30120VS00	CmoCh13G005060	8.43093	berberine bridge enzyme-like 15
SS30120VS00	CmoCh19G005420	8.45718	pathogenesis-related protein 1-like
SS30120VS00	CmoCh14G011850	8.45943	B12D protein
SS3012VS00	CmoCh04G009150	8.4926	Unknown protein
SS30120VS00	CmoCh17G003370	8.51069	major allergen Pru ar 1-like
SS3012VS00	CmoCh04G012860	8.54727	Dirigent protein
SS30120VS00	CmoCh08G007720	8.5566	Protein kinase domain-containing protein
SS3072VS00	CmoCh19G005430	8.58192	pathogenesis-related protein 1-like
SS30120VS00	CmoCh04G007720	8.71262	heavy metal-associated isoprenylated plant protein 39-like
SS30120VS00	CmoCh11G019340	8.73685	Wound-responsive family protein
SS3072VS00	CmoCh15G006150	8.78362	Unknown protein
SS3072VS00	CmoCh14G011850	8.85348	B12D protein
SS30120VS00	CmoCh14G012810	8.86609	ankyrin repeat-containing protein NPR4-like isoform X3
SS3072VS00	CmoCh15G009030	8.86731	defensin-like protein 1
SS3072VS00	CmoCh13G009730	8.94246	2-oxoglutarate (2OG) and Fe(II)-dependent oxygenase superfamily protein
SS3072VS00	CmoCh19G005410	8.94521	Pathogenesis-related protein 1
SS30120VS00	CmoCh02G004650	8.97237	Peroxidase
SS3072VS00	CmoCh04G007720	8.97624	heavy metal-associated isoprenylated plant protein 39-like
SS30120VS00	CmoCh06G001350	8.97826	Protease inhibitor protein
SS3024VS00	CmoCh05G001820	8.97956	Glutamate receptor 2.5-like isoform X1
SS30120VS00	CmoCh16G008930	8.9911	DUF4228 domain protein
SS30120VS00	CmoCh19G002900	8.99278	Thaumatin-like protein
SS30120VS00	CmoCh19G000690	9.0156	Serine proteinase inhibitor
SS3072VS00	CmoCh06G006960	9.02888	caffeic acid 3-O-methyltransferase-like
SS3072VS00	CmoCh17G009790	9.04085	Peroxidase
SS30120VS00	CmoCh10G006700	9.04414	bark storage protein A
SS30120VS00	CmoCh19G000720	9.04638	Serine proteinase inhibitor
SS3072VS00	CmoCh08G007720	9.05957	Protein kinase domain-containing protein
SS30120VS00	CmoCh04G022620	9.06101	defensin Ec-AMP-D2-like
SS3072VS00	CmoCh04G024410	9.08559	Nitrate reductase
SS3012VS00	CmoCh02G014330	9.16296	Unknown protein
SS3072VS00	CmoCh16G003400	9.26384	Trypsin inhibitor 1-like
SS30120VS00	CmoCh19G007840	9.27871	lysine histidine transporter-like 8
SS3072VS00	CmoCh08G002920	9.27941	ethylene-responsive transcription factor 1B-like
SS30120VS00	CmoCh01G002260	9.35788	cytochrome P450 705A22-like
SS3072VS00	CmoCh10G006700	9.35999	bark storage protein A
SS30120VS00	CmoCh19G000700	9.37453	Serine proteinase inhibitor
SS3072VS00	CmoCh09G011110	9.39737	extensin-1-like
SS3072VS00	CmoCh19G000700	9.4285	Serine proteinase inhibitor
SS30120VS00	CmoCh04G001860	9.44662	cucumisin-like
SS3072VS00	CmoCh06G001350	9.44991	Protease inhibitor protein
SS30120VS00	CmoCh05G002020	9.51512	Patatin
SS3072VS00	CmoCh04G020370	9.64999	calmodulin-like
SS30120VS00	CmoCh19G000730	9.76888	Serine proteinase inhibitor
SS30120VS00	CmoCh15G009040	9.79333	defensin J1-2-like
SS30120VS00	CmoCh19G000680	9.83598	Serine proteinase inhibitor
SS30120VS00	CmoCh13G009720	9.87609	2-oxoglutarate (2OG) and Fe(II)-dependent oxygenase superfamily protein
SS3012VS00	CmoCh19G004280	9.93981	WD repeat-containing protein RUP2-like
SS30120VS00	CmoCh14G018220	10.0006	Inhibitor of trypsin and hageman factor-like
SS3072VS00	CmoCh13G007890	10.0634	Stigma-specific protein Stig1
SS3012VS00	CmoCh01G008880	10.0877	Ankyrin repeat-containing protein
SS3072VS00	CmoCh19G000680	10.2348	Serine proteinase inhibitor
SS3072VS00	CmoCh01G010350	10.2582	alcohol dehydrogenase-like
SS3072VS00	CmoCh18G002560	10.3824	Stigma-specific Stig1 family protein, putative
SS3072VS00	CmoCh19G000690	10.4189	Serine proteinase inhibitor
SS3072VS00	CmoCh03G003910	10.4237	Laccase
SS30120VS00	CmoCh19G007930	10.5967	expansin-like A2
SS30120VS00	CmoCh04G024410	10.6375	Nitrate reductase
SS3072VS00	CmoCh19G002920	10.6485	Thaumatin-like protein
SS3072VS00	CmoCh19G005470	10.6792	pathogenesis-related protein 1-like
SS3072VS00	CmoCh14G016620	10.7095	flowering-promoting factor 1-like protein 1
SS30120VS00	CmoCh19G002910	10.7473	Thaumatin-like protein
SS3072VS00	CmoCh19G000730	10.7696	Serine proteinase inhibitor
SS3072VS00	CmoCh19G002900	10.7732	Thaumatin-like protein
SS3072VS00	CmoCh19G000740	10.78	Pumpkin fruit trypsin inhibitor
SS30120VS00	CmoCh01G018940	10.8338	alpha/beta-Hydrolases superfamily protein
SS3072VS00	CmoCh19G002890	10.8448	Thaumatin-like protein
SS3072VS00	CmoCh14G012810	10.8654	ankyrin repeat-containing protein NPR4-like isoform X3
SS3072VS00	CmoCh15G009040	10.9147	defensin J1-2-like
SS3072VS00	CmoCh08G010630	10.9234	ethylene-responsive transcription factor ERF098-like
SS30120VS00	CmoCh19G000670	10.9852	Proteinase inhibitor
SS3072VS00	CmoCh13G009720	11.1806	2-oxoglutarate (2OG) and Fe(II)-dependent oxygenase superfamily protein
SS3072VS00	CmoCh20G005410	11.3177	Glycosyltransferase
SS30120VS00	CmoCh09G011110	11.4384	extensin-1-like
SS3072VS00	CmoCh05G002020	11.7439	Patatin
SS3072VS00	CmoCh01G018940	11.7714	alpha/beta-Hydrolases superfamily protein
SS3072VS00	CmoCh19G007940	11.8231	expansin-like A3
SS3072VS00	CmoCh19G000670	11.8453	Proteinase inhibitor
SS3072VS00	CmoCh16G008930	11.9187	DUF4228 domain protein
SS3072VS00	CmoCh11G004010	11.9656	Xyloglucan endotransglucosylase/hydrolase
SS30120VS00	CmoCh19G002930	12.0102	Thaumatin-like protein
SS3072VS00	CmoCh19G000720	12.0313	Serine proteinase inhibitor
SS3072VS00	CmoCh01G007460	12.1391	Peroxidase
SS30120VS00	CmoCh01G007460	12.2756	Peroxidase
SS3072VS00	CmoCh19G002840	12.5145	Peroxidase
SS30120VS00	CmoCh19G007940	12.5333	expansin-like A3
SS3072VS00	CmoCh11G007670	12.6499	Flavin-containing monooxygenase
SS3072VS00	CmoCh19G002910	12.85	Thaumatin-like protein
SS30120VS00	CmoCh19G000740	12.9408	Pumpkin fruit trypsin inhibitor
SS30120VS00	CmoCh11G004010	13.0228	Xyloglucan endotransglucosylase/hydrolase
SS30120VS00	CmoCh19G005440	13.2203	pathogenesis-related protein 1-like
SS30120VS00	CmoCh13G002460	13.2344	Carbonic anhydrase
SS3072VS00	CmoCh19G002870	13.2984	chaperone protein dnaJ 20, chloroplastic-like
SS3072VS00	CmoCh19G007910	14.1271	expansin-like A2
SS3072VS00	CmoCh19G002930	14.1465	Thaumatin-like protein
SS3072VS00	CmoCh19G007900	14.2408	expansin-like A3
SS3072VS00	CmoCh13G002460	14.3276	Carbonic anhydrase
SS30120VS00	CmoCh19G007910	15.5534	expansin-like A2
SS3072VS00	CmoCh19G007920	16.3737	expansin-like A3
SS30120VS00	CmoCh19G007920	17.2614	expansin-like A3
SS30120VS00	CmoCh19G007900	28.8022	expansin-like A3

## Sheet: Butterbush DEGs
Supplementary Table S2: Differentially expressed genes in Butterbush (here coded as BBT)
BBT120VS00	CmoCh17G013750	-9.09683	protein LAZY 1-like
BBT120VS00	CmoCh02G017500	-9.04406	Flavin-containing monooxygenase
BBT12VS00	CmoCh07G007230	-8.92653	ethylene-responsive transcription factor ERF109-like
BBT72VS00	CmoCh17G007890	-8.83647	thionin-like protein 2
BBT120VS00	CmoCh12G004180	-8.39224	zinc-finger homeodomain protein 2-like
BBT72VS00	CmoCh20G011280	-8.17306	Cytochrome P450
BBT12VS00	CmoCh04G020370	-8.12101	calmodulin-like
BBT12VS00	CmoCh19G008080	-7.99243	Arabidopsis protein of unknown function (DUF241)
BBT72VS00	CmoCh08G009430	-7.93641	Very-long-chain aldehyde decarbonylase GL1-1
BBT120VS00	CmoCh14G007420	-7.7552	protein LAZY 1-like
BBT120VS00	CmoCh20G011340	-7.73213	Root meristem growth factor 9-like protein
BBT12VS00	CmoCh13G010000	-7.69787	Unknown protein
BBT72VS00	CmoCh19G008080	-7.67178	Arabidopsis protein of unknown function (DUF241)
BBT72VS00	CmoCh12G003660	-7.64284	auxin-responsive protein SAUR50-like
BBT72VS00	CmoCh03G009540	-7.63199	BTB/POZ domain-containing protein
BBT120VS00	CmoCh19G008080	-7.61487	Arabidopsis protein of unknown function (DUF241)
BBT120VS00	CmoCh12G003660	-7.58752	auxin-responsive protein SAUR50-like
BBT120VS00	CmoCh01G016990	-7.51613	protein NETWORKED 2A-like
BBT72VS00	CmoCh11G005180	-7.39688	BSD domain-containing protein
BBT120VS00	CmoCh19G011190	-7.36817	zinc finger protein CONSTANS-LIKE 5-like
BBT72VS00	CmoCh18G003310	-7.36054	Carboxypeptidase
BBT120VS00	CmoCh09G012820	-7.32061	ethylene-responsive transcription factor ERF021-like
BBT72VS00	CmoCh15G011500	-7.30217	Auxin-responsive protein
BBT72VS00	CmoCh18G002340	-7.28907	Bidirectional sugar transporter SWEET
BBT72VS00	CmoCh17G012160	-7.27309	Unknown protein
BBT12VS00	CmoCh20G000070	-7.26763	Protein of Unknown Function (DUF239)
BBT12VS00	CmoCh19G009760	-7.23798	Actin cytoskeleton-regulatory complex protein
BBT72VS00	CmoCh02G014330	-7.19272	Unknown protein
BBT12VS00	CmoCh01G003940	-7.15788	DELLA protein
BBT72VS00	CmoCh14G002530	-7.08359	Cytochrome P450
BBT24VS00	CmoCh09G009090	-7.07856	organic cation/carnitine transporter 4-like
BBT120VS00	CmoCh09G009140	-7.07792	C2H2-type domain-containing protein
BBT72VS00	CmoCh04G021150	-7.03658	Eukaryotic aspartyl protease family protein
BBT72VS00	CmoCh15G012460	-7.00317	transcription factor bHLH118-like
BBT72VS00	CmoCh13G001530	-6.91635	zinc finger protein CONSTANS-LIKE 5-like
BBT12VS00	CmoCh01G016570	-6.91338	RNA-binding protein 38
BBT12VS00	CmoCh19G007780	-6.87269	O-methyltransferase family protein
BBT12VS00	CmoCh02G015610	-6.87266	Phytocyanin domain-containing protein
BBT12VS00	CmoCh11G018650	-6.86928	Calcium-binding EF-hand family protein
BBT120VS00	CmoCh17G004740	-6.78276	U3 small nucleolar RNA-associated protein 14 homolog A
BBT72VS00	CmoCh20G011290	-6.77904	Unknown protein
BBT72VS00	CmoCh15G009130	-6.75712	C2H2-type domain-containing protein
BBT72VS00	CmoCh10G012640	-6.73337	muscle M-line assembly protein unc-89-like isoform X1
BBT120VS00	CmoCh01G003770	-6.65962	MLP-like protein 34
BBT72VS00	CmoCh16G006190	-6.61258	cation/H(+) antiporter 18-like
BBT120VS00	CmoCh03G009540	-6.61185	BTB/POZ domain-containing protein
BBT72VS00	CmoCh04G002040	-6.57136	ribulose bisphosphate carboxylase/oxygenase activase, chloroplastic
BBT72VS00	CmoCh02G015610	-6.55068	Phytocyanin domain-containing protein
BBT12VS00	CmoCh20G000660	-6.53134	Lipoxygenase
BBT120VS00	CmoCh04G029260	-6.51503	CaM_binding domain-containing protein
BBT72VS00	CmoCh11G019910	-6.5113	Protein root UVB sensitive 1, chloroplastic
BBT72VS00	CmoCh18G002320	-6.50995	Unknown protein
BBT24VS00	CmoCh19G009400	-6.49559	S-type anion channel SLAH1-like
BBT120VS00	CmoCh02G015610	-6.49389	Phytocyanin domain-containing protein
BBT12VS00	CmoCh08G007990	-6.41408	FLZ-type domain-containing protein
BBT72VS00	CmoCh16G003580	-6.37292	alpha-L-fucosidase 2-like
BBT120VS00	CmoCh07G010120	-6.35105	Plant protein 1589 of unknown function
BBT120VS00	CmoCh17G004760	-6.34213	S-adenosyl-L-methionine-dependent methyltransferase
BBT12VS00	CmoCh01G015430	-6.328	protein PHOX1-like isoform X1
BBT72VS00	CmoCh02G004810	-6.32206	cytochrome P450 89A2-like
BBT12VS00	CmoCh05G009030	-6.29408	Unknown protein
BBT12VS00	CmoCh15G012600	-6.28262	Unknown protein
BBT72VS00	CmoCh13G007660	-6.28174	Peroxidase
BBT72VS00	CmoCh05G000280	-6.27188	Plant protein 1589 of unknown function
BBT72VS00	CmoCh02G017500	-6.231	Flavin-containing monooxygenase
BBT72VS00	CmoCh04G030700	-6.21526	thaumatin-like protein
BBT12VS00	CmoCh04G010110	-6.20368	Thiamine thiazole synthase, chloroplastic
BBT72VS00	CmoCh09G009140	-6.17374	C2H2-type domain-containing protein
BBT72VS00	CmoCh02G000920	-6.16073	tyrosine aminotransferase-like
BBT72VS00	CmoCh04G005620	-6.01573	nigrin b-like isoform X1
BBT12VS00	CmoCh16G008570	-6.01516	phytohormone-binding protein-like
BBT12VS00	CmoCh02G017500	-6.00585	Flavin-containing monooxygenase
BBT12VS00	CmoCh02G010610	-6.00264	dehydration-responsive element-binding protein 1E-like
BBT72VS00	CmoCh16G005530	-5.99943	abscisic acid 8'-hydroxylase 1-like
BBT120VS00	CmoCh04G009000	-5.99791	Unknown protein
BBT120VS00	CmoCh18G011810	-5.94831	protein PHYTOCHROME KINASE SUBSTRATE 1-like
BBT12VS00	CmoCh15G012620	-5.92319	ethylene-responsive transcription factor ERF027-like
BBT72VS00	CmoCh20G011340	-5.91596	Root meristem growth factor 9-like protein
BBT72VS00	CmoCh04G006020	-5.91413	Unknown protein
BBT72VS00	CmoCh13G005020	-5.90162	berberine bridge enzyme-like 18
BBT12VS00	CmoCh01G018200	-5.90159	Unknown protein
BBT120VS00	CmoCh13G001530	-5.88199	zinc finger protein CONSTANS-LIKE 5-like
BBT12VS00	CmoCh20G000670	-5.8653	Lipoxygenase
BBT12VS00	CmoCh09G012820	-5.8397	ethylene-responsive transcription factor ERF021-like
BBT12VS00	CmoCh20G007080	-5.83797	amino acid transporter AVT3B-like
BBT12VS00	CmoCh18G012610	-5.82331	Unknown protein
BBT12VS00	CmoCh14G002000	-5.81879	Unknown protein
BBT120VS00	CmoCh15G012610	-5.76527	dehydration-responsive element-binding protein 1A-like
BBT72VS00	CmoCh04G000770	-5.75954	CRAL-TRIO domain-containing protein
BBT12VS00	CmoCh16G005530	-5.72382	abscisic acid 8'-hydroxylase 1-like
BBT12VS00	CmoCh19G007820	-5.71835	L-ascorbate oxidase homolog
BBT72VS00	CmoCh02G016540	-5.68447	Microspore-specific promoter 2, putative
BBT72VS00	CmoCh10G000260	-5.64444	BHLH transcription factor
BBT12VS00	CmoCh03G003320	-5.62224	macrophage migration inhibitory factor homolog
BBT72VS00	CmoCh19G007780	-5.58896	O-methyltransferase family protein
BBT72VS00	CmoCh19G007790	-5.58617	O-methyltransferase family protein
BBT12VS00	CmoCh02G008320	-5.57458	zinc finger protein ZAT11-like
BBT120VS00	CmoCh11G020560	-5.56934	zinc finger protein CONSTANS-LIKE 5-like
BBT12VS00	CmoCh01G019980	-5.56838	Thioredoxin
BBT72VS00	CmoCh01G004710	-5.56404	zinc finger protein CONSTANS-LIKE 2-like
BBT12VS00	CmoCh11G009450	-5.54888	Flowering locus T-like 1
BBT12VS00	CmoCh16G001580	-5.54039	dehydration-responsive element-binding protein 1A-like
BBT72VS00	CmoCh19G007520	-5.52485	Glycerate dehydrogenase
BBT12VS00	CmoCh19G004060	-5.50541	expansin-like B1
BBT72VS00	CmoCh07G000610	-5.50306	alpha/beta-Hydrolases superfamily protein
BBT72VS00	CmoCh05G001560	-5.49974	Gibberellin-regulated protein
BBT12VS00	CmoCh04G005620	-5.48148	nigrin b-like isoform X1
BBT12VS00	CmoCh17G010220	-5.46159	DUF761 domain-containing protein
BBT72VS00	CmoCh13G011790	-5.45757	protein PHYTOCHROME KINASE SUBSTRATE 1-like
BBT72VS00	CmoCh19G010960	-5.43202	Unknown protein
BBT12VS00	CmoCh07G006710	-5.42076	Peroxidase
BBT72VS00	CmoCh02G005240	-5.41823	BTB/POZ domain-containing protein
BBT12VS00	CmoCh15G012640	-5.38273	Protein DETOXIFICATION
BBT72VS00	CmoCh07G013470	-5.37877	E3 ubiquitin-protein ligase RNF181-like
BBT72VS00	CmoCh14G017310	-5.37119	Glucose-1-phosphate adenylyltransferase
BBT120VS00	CmoCh15G012600	-5.35985	Unknown protein
BBT72VS00	CmoCh04G009000	-5.35867	Unknown protein
BBT72VS00	CmoCh10G005920	-5.35151	protein NRT1/ PTR FAMILY 6.2-like
BBT72VS00	CmoCh13G006020	-5.34373	GDSL esterase/lipase
BBT12VS00	CmoCh11G013590	-5.34269	Ethylene-responsive transcription factor
BBT72VS00	CmoCh15G003850	-5.32884	zinc finger protein CONSTANS-LIKE 7 isoform X1
BBT12VS00	CmoCh16G001500	-5.3194	S-adenosyl-L-methionine-dependent methyltransferases superfamily protein
BBT72VS00	CmoCh03G007150	-5.31768	Transducin/WD40 repeat-like superfamily protein
BBT12VS00	CmoCh05G004170	-5.30749	HCO3- transporter family
BBT72VS00	CmoCh19G004760	-5.30343	protein LOL1-like
BBT12VS00	CmoCh02G003500	-5.29897	auxin-responsive protein SAUR21-like
BBT120VS00	CmoCh15G012640	-5.2867	Protein DETOXIFICATION
BBT72VS00	CmoCh07G010120	-5.28363	Plant protein 1589 of unknown function
BBT72VS00	CmoCh16G000590	-5.25482	CCT domain-containing protein
BBT12VS00	CmoCh07G010120	-5.24939	Plant protein 1589 of unknown function
BBT120VS00	CmoCh02G014330	-5.24625	Unknown protein
BBT12VS00	CmoCh11G004000	-5.24481	Xyloglucan endotransglucosylase/hydrolase
BBT12VS00	CmoCh05G001560	-5.23849	Gibberellin-regulated protein
BBT120VS00	CmoCh11G004000	-5.23726	Xyloglucan endotransglucosylase/hydrolase
BBT120VS00	CmoCh11G004320	-5.23298	UDP-glucuronate 4-epimerase 4
BBT72VS00	CmoCh07G007230	-5.21952	ethylene-responsive transcription factor ERF109-like
BBT12VS00	CmoCh01G008960	-5.21634	ethylene-responsive transcription factor ERF022-like
BBT12VS00	CmoCh04G024610	-5.21435	ethylene-responsive transcription factor ERF014
BBT12VS00	CmoCh19G010960	-5.17918	Unknown protein
BBT72VS00	CmoCh15G003350	-5.17897	WAT1-related protein
BBT72VS00	CmoCh08G011830	-5.167	monothiol glutaredoxin-S2-like
BBT12VS00	CmoCh19G009770	-5.16069	fasciclin-like arabinogalactan protein 21
BBT12VS00	CmoCh01G018210	-5.14539	Cellulose synthase-like protein
BBT120VS00	CmoCh01G019440	-5.13693	Transducin/WD40 repeat-like superfamily protein
BBT12VS00	CmoCh17G001760	-5.13124	transcription factor bHLH92
BBT72VS00	CmoCh18G010100	-5.12259	Unknown protein
BBT72VS00	CmoCh03G013530	-5.09646	GDSL esterase/lipase
BBT120VS00	CmoCh04G005620	-5.05834	nigrin b-like isoform X1
BBT12VS00	CmoCh17G009490	-5.05265	UPF0496 protein 4-like
BBT12VS00	CmoCh19G009400	-5.04373	S-type anion channel SLAH1-like
BBT72VS00	CmoCh05G013450	-5.03241	heat stress transcription factor C-1-like
BBT120VS00	CmoCh20G005930	-5.01975	transcription factor MYB30-like
BBT120VS00	CmoCh18G002340	-5.01889	Bidirectional sugar transporter SWEET
BBT120VS00	CmoCh07G007610	-5.01209	HTH-type transcriptional regulator protein ptxE
BBT120VS00	CmoCh19G010940	-5.01025	Xyloglucan endotransglucosylase/hydrolase
BBT72VS00	CmoCh14G022240	-5.00533	Late cornified envelope protein 1E
BBT120VS00	CmoCh14G007750	-4.97533	NAD(P)-binding Rossmann-fold superfamily protein
BBT120VS00	CmoCh06G009490	-4.95826	Auxin-responsive protein
BBT72VS00	CmoCh04G030560	-4.95601	AAI domain-containing protein
BBT120VS00	CmoCh02G016540	-4.95277	Microspore-specific promoter 2, putative
BBT120VS00	CmoCh01G003940	-4.9419	DELLA protein
BBT12VS00	CmoCh07G007610	-4.90957	HTH-type transcriptional regulator protein ptxE
BBT72VS00	CmoCh11G001590	-4.90852	transcription factor TCP14-like
BBT12VS00	CmoCh01G018220	-4.90808	Unknown protein
BBT120VS00	CmoCh16G000590	-4.9077	CCT domain-containing protein
BBT120VS00	CmoCh12G010940	-4.90277	Glycoprotein membrane precursor GPI-anchored
BBT12VS00	CmoCh01G004470	-4.89652	Unknown protein
BBT12VS00	CmoCh04G015120	-4.89048	cucumisin-like
BBT72VS00	CmoCh19G010930	-4.86431	Xyloglucan endotransglucosylase/hydrolase
BBT72VS00	CmoCh06G000120	-4.85637	protein STRICTOSIDINE SYNTHASE-LIKE 2-like
BBT72VS00	CmoCh19G010940	-4.85386	Xyloglucan endotransglucosylase/hydrolase
BBT72VS00	CmoCh10G004370	-4.84926	Xyloglucan endotransglucosylase/hydrolase
BBT72VS00	CmoCh01G003770	-4.84905	MLP-like protein 34
BBT12VS00	CmoCh04G005340	-4.84114	ethylene-responsive transcription factor ERF109-like
BBT12VS00	CmoCh13G005560	-4.83256	protein TIFY 5A-like
BBT120VS00	CmoCh06G004540	-4.82527	ethylene-responsive transcription factor ERF024-like
BBT120VS00	CmoCh14G002250	-4.82476	aquaporin TIP1-1-like
BBT72VS00	CmoCh19G010950	-4.81993	Xyloglucan endotransglucosylase/hydrolase
BBT12VS00	CmoCh06G010490	-4.8183	WRKY domain-containing protein
BBT72VS00	CmoCh13G007730	-4.81331	Protein of unknown function, DUF584
BBT72VS00	CmoCh02G005670	-4.80408	cyclin-dependent kinase inhibitor 7-like
BBT24VS00	CmoCh16G013140	-4.80307	Protease inhibitor protein
BBT12VS00	CmoCh20G006300	-4.78512	Unknown protein
BBT12VS00	CmoCh13G005600	-4.78039	protein TIFY 5A-like
BBT72VS00	CmoCh04G011390	-4.77074	protein NRT1/ PTR FAMILY 5.1-like
BBT12VS00	CmoCh06G005470	-4.76423	fasciclin-like arabinogalactan protein 17
BBT120VS00	CmoCh16G000760	-4.75802	arabinogalactan peptide 22-like
BBT72VS00	CmoCh11G003920	-4.74194	AAA-ATPase
BBT72VS00	CmoCh11G004000	-4.73293	Xyloglucan endotransglucosylase/hydrolase
BBT72VS00	CmoCh14G006350	-4.72607	protein NRT1/ PTR FAMILY 5.8-like
BBT72VS00	CmoCh11G020560	-4.72404	zinc finger protein CONSTANS-LIKE 5-like
BBT72VS00	CmoCh05G013440	-4.7212	Unknown protein
BBT120VS00	CmoCh19G004760	-4.71971	protein LOL1-like
BBT120VS00	CmoCh19G010960	-4.71312	Unknown protein
BBT72VS00	CmoCh02G010900	-4.70334	short-chain dehydrogenase TIC 32, chloroplastic-like
BBT12VS00	CmoCh19G010950	-4.69956	Xyloglucan endotransglucosylase/hydrolase
BBT12VS00	CmoCh19G010930	-4.69556	Xyloglucan endotransglucosylase/hydrolase
BBT72VS00	CmoCh04G006040	-4.6895	Unknown protein
BBT72VS00	CmoCh18G007210	-4.67389	WD_REPEATS_REGION domain-containing protein
BBT72VS00	CmoCh14G005960	-4.67284	aquaporin NIP2-1-like
BBT12VS00	CmoCh11G013770	-4.66551	CBS domain-containing protein CBSX1, chloroplastic
BBT72VS00	CmoCh09G012770	-4.66024	ethylene-responsive transcription factor ERF022-like
BBT12VS00	CmoCh11G019340	-4.6601	Wound-responsive family protein
BBT72VS00	CmoCh04G015780	-4.65644	zinc finger protein CONSTANS-LIKE 16-like
BBT72VS00	CmoCh20G005930	-4.65276	transcription factor MYB30-like
BBT72VS00	CmoCh01G009250	-4.65154	protein NRT1/ PTR FAMILY 4.4-like
BBT120VS00	CmoCh07G007230	-4.6394	ethylene-responsive transcription factor ERF109-like
BBT120VS00	CmoCh19G010950	-4.63596	Xyloglucan endotransglucosylase/hydrolase
BBT72VS00	CmoCh16G001580	-4.6306	dehydration-responsive element-binding protein 1A-like
BBT72VS00	CmoCh02G016470	-4.62212	protein LOL1
BBT120VS00	CmoCh18G002730	-4.61148	ATP synthase gamma chain
BBT72VS00	CmoCh11G005190	-4.61075	Vesicle-associated membrane protein, putative
BBT72VS00	CmoCh17G007330	-4.60907	Histidine phosphotransfer protein
BBT120VS00	CmoCh06G007280	-4.60566	ethylene-responsive transcription factor ERF026-like
BBT72VS00	CmoCh15G002040	-4.6	Mental retardation GTPase activating protein
BBT12VS00	CmoCh16G009250	-4.59978	Auxin-responsive GH3 family protein
BBT120VS00	CmoCh04G015780	-4.59236	zinc finger protein CONSTANS-LIKE 16-like
BBT72VS00	CmoCh15G006250	-4.58947	glycolipid transfer protein 3-like
BBT12VS00	CmoCh11G004320	-4.58003	UDP-glucuronate 4-epimerase 4
BBT120VS00	CmoCh17G007890	-4.56533	thionin-like protein 2
BBT120VS00	CmoCh09G009440	-4.55789	Cytochrome P450
BBT72VS00	CmoCh11G017170	-4.55684	SAUR-like auxin-responsive protein family
BBT12VS00	CmoCh07G003260	-4.53053	1-aminocyclopropane-1-carboxylate oxidase
BBT12VS00	CmoCh13G010010	-4.51436	Arf-GAP domain-containing protein
BBT72VS00	CmoCh06G007910	-4.51342	protein NRT1/ PTR FAMILY 6.3-like
BBT120VS00	CmoCh17G001860	-4.50769	Auxin-responsive protein
BBT12VS00	CmoCh03G010670	-4.50687	pollen-specific leucine-rich repeat extensin-like protein 1
BBT72VS00	CmoCh15G013490	-4.49943	short-chain dehydrogenase TIC 32, chloroplastic-like
BBT72VS00	CmoCh15G010860	-4.49902	protein PSY2-like
BBT24VS00	CmoCh20G000660	-4.48819	Lipoxygenase
BBT120VS00	CmoCh15G010860	-4.48794	protein PSY2-like
BBT72VS00	CmoCh13G005330	-4.47642	protein kinase PINOID-like
BBT72VS00	CmoCh12G003380	-4.47282	Thioredoxin
BBT72VS00	CmoCh19G006440	-4.4711	2-oxoglutarate (2OG) and Fe(II)-dependent oxygenase superfamily protein
BBT72VS00	CmoCh15G012600	-4.46388	Unknown protein
BBT12VS00	CmoCh04G013940	-4.45666	sigma factor binding protein 1, chloroplastic-like
BBT72VS00	CmoCh01G020290	-4.45093	gibberellin-regulated protein 1-like
BBT72VS00	CmoCh11G019010	-4.44827	Protein DETOXIFICATION
BBT12VS00	CmoCh09G003110	-4.44692	Cellulose synthase-like protein
BBT120VS00	CmoCh10G012640	-4.43883	muscle M-line assembly protein unc-89-like isoform X1
BBT72VS00	CmoCh06G007900	-4.4321	Phenylalanine--tRNA ligase beta subunit
BBT72VS00	CmoCh18G011810	-4.42829	protein PHYTOCHROME KINASE SUBSTRATE 1-like
BBT120VS00	CmoCh01G004710	-4.42031	zinc finger protein CONSTANS-LIKE 2-like
BBT72VS00	CmoCh04G002250	-4.41708	Unknown protein
BBT72VS00	CmoCh06G000130	-4.41614	protein STRICTOSIDINE SYNTHASE-LIKE 2-like
BBT72VS00	CmoCh14G007750	-4.40645	NAD(P)-binding Rossmann-fold superfamily protein
BBT12VS00	CmoCh11G007230	-4.40549	DDE Tnp4 domain-containing protein
BBT72VS00	CmoCh04G027000	-4.38783	plasma membrane intrinsic protein 2
BBT72VS00	CmoCh02G013770	-4.38696	Unknown protein
BBT72VS00	CmoCh05G000200	-4.38679	polygalacturonase At1g48100-like
BBT72VS00	CmoCh01G004470	-4.37718	Unknown protein
BBT72VS00	CmoCh06G010040	-4.37591	homeobox-leucine zipper protein HAT3-like
BBT24VS00	CmoCh04G015120	-4.37274	cucumisin-like
BBT12VS00	CmoCh07G010520	-4.37071	Avr9/Cf-9 rapidly elicited protein
BBT72VS00	CmoCh14G019130	-4.36753	S-protein homolog
BBT12VS00	CmoCh01G004500	-4.36188	Unknown protein
BBT72VS00	CmoCh06G014690	-4.36165	CASP-like protein
BBT120VS00	CmoCh07G000610	-4.35397	alpha/beta-Hydrolases superfamily protein
BBT120VS00	CmoCh09G002890	-4.35105	protein SOB FIVE-LIKE 6-like
BBT120VS00	CmoCh06G009850	-4.34547	Late cornified envelope protein 1E
BBT72VS00	CmoCh09G012960	-4.34034	Unknown protein
BBT72VS00	CmoCh07G011050	-4.33385	Vacuolar cation/proton exchanger
BBT120VS00	CmoCh13G007660	-4.33282	Peroxidase
BBT72VS00	CmoCh02G008390	-4.32732	protein SODIUM POTASSIUM ROOT DEFECTIVE 3-like
BBT72VS00	CmoCh02G014220	-4.32684	Unknown protein
BBT72VS00	CmoCh01G020270	-4.32071	C2H2-type domain-containing protein
BBT120VS00	CmoCh04G009030	-4.31804	1-aminocyclopropane-1-carboxylate synthase
BBT12VS00	CmoCh18G004040	-4.31472	Rho_N domain-containing protein
BBT12VS00	CmoCh12G001130	-4.30795	pollen-specific protein C13-like
BBT120VS00	CmoCh11G001690	-4.30669	cyclic dof factor 3-like
BBT12VS00	CmoCh04G011860	-4.30522	Elf4 domain-containing protein
BBT120VS00	CmoCh02G010610	-4.30488	dehydration-responsive element-binding protein 1E-like
BBT72VS00	CmoCh04G009080	-4.30011	Xyloglucan endotransglucosylase/hydrolase
BBT72VS00	CmoCh20G010020	-4.2992	AB hydrolase-1 domain-containing protein
BBT12VS00	CmoCh19G010940	-4.29753	Xyloglucan endotransglucosylase/hydrolase
BBT120VS00	CmoCh16G005530	-4.29524	abscisic acid 8'-hydroxylase 1-like
BBT72VS00	CmoCh02G018120	-4.29413	Unknown protein
BBT72VS00	CmoCh06G017200	-4.29094	GATA transcription factor 12-like
BBT120VS00	CmoCh06G002070	-4.28853	abscisic acid receptor PYL4-like
BBT12VS00	CmoCh01G015350	-4.28848	ethylene-responsive transcription factor ERF003-like
BBT120VS00	CmoCh19G007520	-4.28641	Glycerate dehydrogenase
BBT12VS00	CmoCh15G012610	-4.28285	dehydration-responsive element-binding protein 1A-like
BBT72VS00	CmoCh09G002890	-4.28014	protein SOB FIVE-LIKE 6-like
BBT72VS00	CmoCh02G003650	-4.27916	Fructose-bisphosphate aldolase
BBT72VS00	CmoCh07G007610	-4.27724	HTH-type transcriptional regulator protein ptxE
BBT120VS00	CmoCh11G013590	-4.275	Ethylene-responsive transcription factor
BBT72VS00	CmoCh10G003830	-4.27235	sodium transporter HKT1
BBT120VS00	CmoCh03G013530	-4.26553	GDSL esterase/lipase
BBT72VS00	CmoCh04G001780	-4.26473	Glycosyltransferase
BBT72VS00	CmoCh04G028930	-4.25247	MYB transcription factor
BBT72VS00	CmoCh20G008510	-4.24719	Unknown protein
BBT120VS00	CmoCh18G008090	-4.24689	Xyloglucan endotransglucosylase/hydrolase
BBT12VS00	CmoCh10G007630	-4.24655	DDE Tnp4 domain-containing protein
BBT72VS00	CmoCh04G011930	-4.24246	glycosyltransferase family 64 protein C4
BBT72VS00	CmoCh04G005610	-4.24217	Nigrin b-like
BBT72VS00	CmoCh01G000080	-4.23822	Unknown protein
BBT12VS00	CmoCh14G005040	-4.23627	cytochrome P450 94A1-like
BBT72VS00	CmoCh09G009440	-4.23209	Cytochrome P450
BBT120VS00	CmoCh01G020270	-4.23203	C2H2-type domain-containing protein
BBT120VS00	CmoCh04G002040	-4.23006	ribulose bisphosphate carboxylase/oxygenase activase, chloroplastic
BBT12VS00	CmoCh09G009110	-4.22983	Unknown protein
BBT120VS00	CmoCh13G011790	-4.22842	protein PHYTOCHROME KINASE SUBSTRATE 1-like
BBT72VS00	CmoCh05G011570	-4.22043	Glycoprotein membrane precursor GPI-anchored
BBT72VS00	CmoCh14G001000	-4.21822	TIP41-like protein
BBT24VS00	CmoCh12G004830	-4.21583	calmodulin-like
BBT12VS00	CmoCh17G007330	-4.20715	Histidine phosphotransfer protein
BBT120VS00	CmoCh13G005020	-4.19877	berberine bridge enzyme-like 18
BBT12VS00	CmoCh10G004350	-4.19621	Xyloglucan endotransglucosylase/hydrolase
BBT12VS00	CmoCh18G012680	-4.19307	remorin
BBT72VS00	CmoCh06G009490	-4.18476	Auxin-responsive protein
BBT72VS00	CmoCh11G006690	-4.18473	Oxidative stress 3
BBT72VS00	CmoCh02G010610	-4.1823	dehydration-responsive element-binding protein 1E-like
BBT72VS00	CmoCh04G001840	-4.18133	Encodes a protein involved in salt tolerance, names SIS (Salt Induced Serine rich).
BBT12VS00	CmoCh02G018590	-4.17773	Unknown protein
BBT72VS00	CmoCh02G003900	-4.17511	phosphatidylinositol/phosphatidylcholine transfer protein SFH3-like
BBT72VS00	CmoCh09G012820	-4.17385	ethylene-responsive transcription factor ERF021-like
BBT12VS00	CmoCh06G004540	-4.16235	ethylene-responsive transcription factor ERF024-like
BBT72VS00	CmoCh12G004180	-4.15981	zinc-finger homeodomain protein 2-like
BBT120VS00	CmoCh07G000770	-4.1579	Unknown protein
BBT72VS00	CmoCh06G008550	-4.15662	FLZ-type domain-containing protein
BBT72VS00	CmoCh09G007180	-4.15334	transcription factor PIF4-like
BBT72VS00	CmoCh15G012980	-4.14979	Plasma membrane intrinsic protein 1
BBT24VS00	CmoCh19G005420	-4.14927	pathogenesis-related protein 1-like
BBT72VS00	CmoCh16G009100	-4.14714	Thiamine thiazole synthase, chloroplastic
BBT12VS00	CmoCh01G000670	-4.14472	Unknown protein
BBT72VS00	CmoCh17G001860	-4.12656	Auxin-responsive protein
BBT72VS00	CmoCh08G003550	-4.11512	Adenylate isopentenyltransferase 3
BBT12VS00	CmoCh01G002370	-4.11451	Unknown protein
BBT120VS00	CmoCh13G006020	-4.11175	GDSL esterase/lipase
BBT12VS00	CmoCh15G001670	-4.1071	HIG1 domain-containing protein
BBT72VS00	CmoCh11G001690	-4.10677	cyclic dof factor 3-like
BBT120VS00	CmoCh17G008070	-4.10331	Phototropic-responsive NPH3 family protein
BBT72VS00	CmoCh07G000480	-4.1029	WRKY domain-containing protein
BBT72VS00	CmoCh04G001880	-4.09012	Mitochondrial substrate carrier family protein
BBT12VS00	CmoCh04G013270	-4.09005	J domain-containing protein
BBT12VS00	CmoCh07G010300	-4.08136	dof zinc finger protein 4-like
BBT120VS00	CmoCh13G007730	-4.08016	Protein of unknown function, DUF584
BBT72VS00	CmoCh09G007950	-4.07992	ethylene-responsive transcription factor ERF014-like
BBT72VS00	CmoCh13G009760	-4.07614	Unknown protein
BBT120VS00	CmoCh14G022160	-4.07567	ethylene-responsive transcription factor ERF039-like
BBT12VS00	CmoCh04G028930	-4.06551	MYB transcription factor
BBT72VS00	CmoCh13G006600	-4.06508	Protein of unknown function (DUF506)
BBT72VS00	CmoCh05G004270	-4.06003	thermospermine synthase ACAULIS5
BBT72VS00	CmoCh05G005300	-4.05159	protein EXORDIUM-like
BBT72VS00	CmoCh15G012610	-4.05141	dehydration-responsive element-binding protein 1A-like
BBT72VS00	CmoCh04G018810	-4.05114	cytochrome P450 71B34-like
BBT72VS00	CmoCh01G007710	-4.04867	root phototropism protein 2
BBT72VS00	CmoCh08G006820	-4.04492	aquaporin TIP2-1-like
BBT72VS00	CmoCh20G010610	-4.04362	ABC transporter-like
BBT12VS00	CmoCh04G024050	-4.03495	Unknown protein
BBT72VS00	CmoCh16G001500	-4.02607	S-adenosyl-L-methionine-dependent methyltransferases superfamily protein
BBT12VS00	CmoCh10G008090	-4.02327	protein TIFY 10a-like
BBT120VS00	CmoCh14G006410	-4.0221	gibberellin-regulated protein 14
BBT72VS00	CmoCh10G006520	-4.01094	heat stress transcription factor C-1-like
BBT12VS00	CmoCh11G002890	-4.00467	Unknown protein
BBT72VS00	CmoCh06G001000	-4.00415	Growth-regulating factor
BBT12VS00	CmoCh04G027710	-4.00156	Protein kinase
BBT12VS00	CmoCh09G012770	-3.99922	ethylene-responsive transcription factor ERF022-like
BBT72VS00	CmoCh02G000970	-3.99353	transcription factor bHLH162-like
BBT72VS00	CmoCh04G004560	-3.99105	Protein of unknown function (DUF1005)
BBT72VS00	CmoCh05G001280	-3.98925	Growth-regulating factor
BBT12VS00	CmoCh08G009430	-3.98585	Very-long-chain aldehyde decarbonylase GL1-1
BBT72VS00	CmoCh17G012600	-3.9808	Unknown protein
BBT72VS00	CmoCh01G014680	-3.98049	FLZ-type domain-containing protein
BBT120VS00	CmoCh16G001500	-3.97871	S-adenosyl-L-methionine-dependent methyltransferases superfamily protein
BBT72VS00	CmoCh06G000240	-3.97141	amino acid transporter AVT1A-like isoform X1
BBT72VS00	CmoCh08G012490	-3.9709	Unknown protein
BBT120VS00	CmoCh02G010360	-3.96974	Gibberellin 20-oxidase
BBT12VS00	CmoCh11G014150	-3.96925	zinc finger protein ZAT10
BBT12VS00	CmoCh20G004110	-3.96852	Tropomyosin
BBT72VS00	CmoCh12G010090	-3.96206	CASP-like protein
BBT120VS00	CmoCh07G001290	-3.96086	Chlorophyll a-b binding protein, chloroplastic
BBT72VS00	CmoCh10G001110	-3.9585	Golgin subfamily A member 6-like protein 2
BBT72VS00	CmoCh07G013480	-3.95798	Unknown protein
BBT12VS00	CmoCh04G001880	-3.95668	Mitochondrial substrate carrier family protein
BBT72VS00	CmoCh07G005310	-3.95612	FLZ-type domain-containing protein
BBT72VS00	CmoCh18G013450	-3.95431	Retrovirus-related Pol polyprotein from transposon RE1
BBT72VS00	CmoCh13G007280	-3.95356	transcription factor ILR3-like
BBT120VS00	CmoCh02G000920	-3.95139	tyrosine aminotransferase-like
BBT12VS00	CmoCh03G010660	-3.9473	WAT1-related protein
BBT72VS00	CmoCh17G012590	-3.94614	NAC domain-containing protein
BBT12VS00	CmoCh08G012000	-3.94494	protein RALF-like 33
BBT12VS00	CmoCh06G006050	-3.94214	ELL-associated factor 1-like
BBT120VS00	CmoCh09G008790	-3.94189	receptor-like protein kinase THESEUS 1
BBT12VS00	CmoCh03G008720	-3.93658	Integrase catalytic domain-containing protein
BBT72VS00	CmoCh17G002590	-3.93584	adenylate isopentenyltransferase 5, chloroplastic-like
BBT120VS00	CmoCh04G001880	-3.93178	Mitochondrial substrate carrier family protein
BBT12VS00	CmoCh11G018980	-3.92494	ThiF domain-containing protein
BBT72VS00	CmoCh18G010280	-3.92395	Unknown protein
BBT120VS00	CmoCh11G003920	-3.92301	AAA-ATPase
BBT12VS00	CmoCh09G003130	-3.92253	Unknown protein
BBT120VS00	CmoCh15G003850	-3.91491	zinc finger protein CONSTANS-LIKE 7 isoform X1
BBT12VS00	CmoCh07G010760	-3.91306	Unknown protein
BBT12VS00	CmoCh20G004640	-3.91094	zinc finger protein ZAT12-like
BBT72VS00	CmoCh13G007340	-3.91063	cysteine-rich receptor-like protein kinase 6
BBT72VS00	CmoCh06G014310	-3.90827	Unknown protein
BBT72VS00	CmoCh02G007570	-3.90643	NAD(P)H dehydrogenase (quinone)
BBT120VS00	CmoCh06G010040	-3.89654	homeobox-leucine zipper protein HAT3-like
BBT72VS00	CmoCh05G000330	-3.89553	F-box/kelch-repeat protein At1g23390-like
BBT120VS00	CmoCh16G011920	-3.89298	Eukaryotic aspartyl protease family protein
BBT12VS00	CmoCh16G001410	-3.89092	heat stress transcription factor B-2b-like
BBT12VS00	CmoCh11G008150	-3.89028	Late embryogenesis abundant (LEA) hydroxyproline-rich glycoprotein family
BBT72VS00	CmoCh11G002740	-3.88932	Unknown protein
BBT72VS00	CmoCh17G008070	-3.88846	Phototropic-responsive NPH3 family protein
BBT12VS00	CmoCh15G012860	-3.88792	Glutathione peroxidase
BBT72VS00	CmoCh18G003180	-3.88591	transcription factor MYB102-like
BBT72VS00	CmoCh15G006930	-3.87941	photosystem II 22 kDa protein, chloroplastic-like
BBT12VS00	CmoCh14G003440	-3.87843	Eukaryotic aspartyl protease family protein
BBT12VS00	CmoCh01G020290	-3.86976	gibberellin-regulated protein 1-like
BBT72VS00	CmoCh07G009710	-3.8631	aquaporin PIP2-2-like
BBT72VS00	CmoCh04G024050	-3.86214	Unknown protein
BBT12VS00	CmoCh04G001040	-3.85798	Expansin
BBT72VS00	CmoCh02G014210	-3.85602	Unknown protein
BBT72VS00	CmoCh13G009820	-3.85458	tonoplast intrinsic protein 2
BBT72VS00	CmoCh18G001790	-3.85141	BTB/POZ and TAZ domain-containing protein 1-like
BBT12VS00	CmoCh16G006580	-3.8501	DUF4228 domain-containing protein
BBT120VS00	CmoCh15G007230	-3.83986	meiosis protein mei2-like
BBT12VS00	CmoCh02G002510	-3.83854	Senescence domain-containing protein
BBT72VS00	CmoCh11G017870	-3.83552	protein EXORDIUM-like 5
BBT72VS00	CmoCh06G000550	-3.83207	protein PHYTOCHROME KINASE SUBSTRATE 4-like
BBT72VS00	CmoCh10G001170	-3.83186	Leucine-rich receptor-like protein kinase family protein
BBT120VS00	CmoCh01G014410	-3.83064	ethylene-responsive transcription factor ERF014-like
BBT12VS00	CmoCh18G013450	-3.82401	Retrovirus-related Pol polyprotein from transposon RE1
BBT72VS00	CmoCh20G002050	-3.81837	Phosphoglycerate/bisphosphoglycerate mutase family protein isoform 1
BBT72VS00	CmoCh16G001390	-3.81751	Unknown protein
BBT72VS00	CmoCh03G003620	-3.81576	Vacuolar cation/proton exchanger
BBT12VS00	CmoCh07G001010	-3.81434	protein TIFY 5A-like
BBT12VS00	CmoCh10G008120	-3.81421	ethylene-responsive transcription factor ERF017
BBT12VS00	CmoCh09G005520	-3.80758	RNA-binding protein 38-like
BBT120VS00	CmoCh15G006930	-3.80731	photosystem II 22 kDa protein, chloroplastic-like
BBT72VS00	CmoCh19G004210	-3.80664	myosin-8 isoform X2
BBT12VS00	CmoCh01G001370	-3.80266	acyl-protein thioesterase 2-like
BBT120VS00	CmoCh15G000320	-3.80213	Mitochondrial transcription termination factor family protein isoform 2
BBT72VS00	CmoCh07G001300	-3.79907	Chlorophyll a-b binding protein, chloroplastic
BBT72VS00	CmoCh04G004630	-3.7989	F-box protein SKIP22-like
BBT12VS00	CmoCh02G012190	-3.7936	NDR1/HIN1-like protein 13
BBT12VS00	CmoCh09G000710	-3.78689	Large proline-rich protein bag6-B isoform X1
BBT72VS00	CmoCh14G008870	-3.7856	aspartic proteinase PCS1-like
BBT120VS00	CmoCh01G010590	-3.78554	2-oxoisovalerate dehydrogenase subunit alpha 1, mitochondrial-like
BBT72VS00	CmoCh19G009750	-3.78448	Xyloglucan endotransglucosylase/hydrolase
BBT120VS00	CmoCh08G012530	-3.78216	Peroxidase
BBT12VS00	CmoCh09G009100	-3.7819	scarecrow-like protein 21
BBT120VS00	CmoCh15G000310	-3.77813	gibberellin-regulated protein 9
BBT12VS00	CmoCh16G000760	-3.77549	arabinogalactan peptide 22-like
BBT12VS00	CmoCh04G012660	-3.76982	(1->3)-beta-glucan endohydrolase
BBT12VS00	CmoCh08G009220	-3.76976	Unknown protein
BBT12VS00	CmoCh19G008550	-3.76861	Unknown protein
BBT12VS00	CmoCh05G008870	-3.76586	Unknown protein
BBT24VS00	CmoCh01G019980	-3.76398	Thioredoxin
BBT72VS00	CmoCh14G008310	-3.75766	agamous-like MADS-box protein AGL6
BBT120VS00	CmoCh06G000550	-3.75754	protein PHYTOCHROME KINASE SUBSTRATE 4-like
BBT72VS00	CmoCh08G005180	-3.75637	Cellulose synthase
BBT12VS00	CmoCh03G009530	-3.75602	Calcium-transporting ATPase
BBT120VS00	CmoCh02G000620	-3.75432	E3 ubiquitin-protein ligase COP1
BBT12VS00	CmoCh11G018440	-3.75427	Cytochrome b561 and DOMON domain-containing protein
BBT72VS00	CmoCh18G010270	-3.75332	Ribulose bisphosphate carboxylase small subunit
BBT12VS00	CmoCh16G001420	-3.74809	heat stress transcription factor B-2b-like
BBT72VS00	CmoCh04G000950	-3.74515	Unknown protein
BBT12VS00	CmoCh01G002810	-3.74166	transcription factor MYB78-like
BBT12VS00	CmoCh13G008420	-3.74105	Unknown protein
BBT72VS00	CmoCh11G000260	-3.7408	squamosa promoter-binding-like protein 13A
BBT12VS00	CmoCh02G002450	-3.74005	protein NUCLEAR FUSION DEFECTIVE 4-like
BBT72VS00	CmoCh11G004400	-3.73849	protein TSS
BBT72VS00	CmoCh12G008370	-3.73846	UDP-glucuronate 4-epimerase 1-like
BBT72VS00	CmoCh01G019980	-3.73676	Thioredoxin
BBT12VS00	CmoCh11G003140	-3.73328	Calcium-binding EF-hand family protein
BBT72VS00	CmoCh11G008700	-3.73254	Unknown protein
BBT72VS00	CmoCh17G011930	-3.72811	Auxin-responsive protein
BBT72VS00	CmoCh08G012100	-3.72798	Unknown protein
BBT72VS00	CmoCh16G000770	-3.72797	cation/H(+) antiporter 3-like
BBT72VS00	CmoCh11G008150	-3.72518	Late embryogenesis abundant (LEA) hydroxyproline-rich glycoprotein family
BBT72VS00	CmoCh04G001640	-3.72488	plasma membrane intrinsic protein 1;4
BBT12VS00	CmoCh04G021550	-3.723	Regulator of Vps4 activity in the MVB pathway protein, putative
BBT12VS00	CmoCh09G006490	-3.72201	DUF641 domain-containing protein
BBT12VS00	CmoCh11G007650	-3.72179	ethylene-responsive transcription factor ERF017-like
BBT72VS00	CmoCh02G006210	-3.72164	RING-type E3 ubiquitin transferase
BBT120VS00	CmoCh02G016470	-3.71868	protein LOL1
BBT72VS00	CmoCh04G026910	-3.71437	protein ENHANCED DISEASE RESISTANCE 2-like
BBT12VS00	CmoCh10G005560	-3.71303	Exostosin family protein
BBT72VS00	CmoCh05G006100	-3.71095	Protein of unknown function (DUF1677)
BBT72VS00	CmoCh09G008790	-3.70852	receptor-like protein kinase THESEUS 1
BBT12VS00	CmoCh03G005100	-3.70812	F-box protein
BBT72VS00	CmoCh03G003760	-3.70772	shaggy-like protein kinase 41
BBT72VS00	CmoCh01G012340	-3.70674	DUF1223 domain-containing protein
BBT72VS00	CmoCh14G008580	-3.69821	Polyketide cyclase/dehydrase and lipid transport superfamily protein
BBT72VS00	CmoCh14G012420	-3.69105	Lipase, GDSL
BBT12VS00	CmoCh14G022130	-3.68654	homeobox-leucine zipper protein HAT3-like
BBT72VS00	CmoCh19G009760	-3.68625	Actin cytoskeleton-regulatory complex protein
BBT72VS00	CmoCh03G004100	-3.68349	protein NRT1/ PTR FAMILY 5.6-like
BBT72VS00	CmoCh06G005470	-3.68347	fasciclin-like arabinogalactan protein 17
BBT12VS00	CmoCh13G001240	-3.68247	(1->3)-beta-glucan endohydrolase
BBT72VS00	CmoCh18G000010	-3.6727	Protein of unknown function (DUF1118)
BBT120VS00	CmoCh20G010250	-3.66885	Unknown protein
BBT72VS00	CmoCh12G000270	-3.66688	Plant protein of unknown function (DUF868)
BBT12VS00	CmoCh01G001920	-3.66673	WRKY protein
BBT72VS00	CmoCh02G008530	-3.66184	phototropin-1-like
BBT72VS00	CmoCh14G003790	-3.66164	Unknown protein
BBT12VS00	CmoCh10G011570	-3.66124	Root phototropism protein 3-like isoform X1
BBT72VS00	CmoCh20G009310	-3.66111	binding partner of ACD11 1-like
BBT120VS00	CmoCh01G008290	-3.65685	cyclic dof factor 1-like
BBT72VS00	CmoCh16G013100	-3.65647	Protease inhibitor protein
BBT72VS00	CmoCh11G005970	-3.65584	Heavy metal-associated domain containing protein
BBT12VS00	CmoCh14G015150	-3.65465	calmodulin-like protein 3
BBT12VS00	CmoCh04G013260	-3.65424	Thioredoxin-like protein YLS8
BBT72VS00	CmoCh03G005510	-3.65236	cytochrome P450 77A1
BBT72VS00	CmoCh11G001610	-3.64839	myb-related protein 306-like
BBT12VS00	CmoCh17G003110	-3.64375	protein RALF-like 33
BBT72VS00	CmoCh18G011640	-3.64249	cyclic dof factor 1-like
BBT72VS00	CmoCh05G012390	-3.6408	proteoglycan 4-like isoform X1
BBT12VS00	CmoCh12G000250	-3.63815	Protein-serine/threonine phosphatase
BBT72VS00	CmoCh01G017500	-3.63778	Unknown protein
BBT120VS00	CmoCh13G005360	-3.63634	BAG family molecular chaperone regulator 3-like
BBT12VS00	CmoCh19G010590	-3.63396	Phosphoenolpyruvate carboxylase
BBT24VS00	CmoCh04G013270	-3.63267	J domain-containing protein
BBT72VS00	CmoCh01G001370	-3.62883	acyl-protein thioesterase 2-like
BBT72VS00	CmoCh01G000430	-3.62465	AP2-like ethylene-responsive transcription factor AIL1
BBT12VS00	CmoCh16G001560	-3.62395	Protein DETOXIFICATION
BBT72VS00	CmoCh11G019260	-3.62331	SPARK domain-containing protein
BBT72VS00	CmoCh10G002290	-3.6227	dCTP pyrophosphatase 1
BBT72VS00	CmoCh14G001430	-3.62225	metallothionein-like protein type 2
BBT72VS00	CmoCh04G029240	-3.62001	Cyclic nucleotide gated channel
BBT72VS00	CmoCh02G009310	-3.61599	Glutaredoxin domain-containing protein
BBT72VS00	CmoCh16G000760	-3.61585	arabinogalactan peptide 22-like
BBT72VS00	CmoCh06G002700	-3.6154	protein NRT1/ PTR FAMILY 5.6-like
BBT72VS00	CmoCh14G010440	-3.61453	O-fucosyltransferase family protein
BBT12VS00	CmoCh11G017690	-3.61202	expansin-like A2
BBT12VS00	CmoCh06G002720	-3.60732	Receptor-like serine/threonine-protein kinase
BBT12VS00	CmoCh08G008560	-3.60684	Delta(8)-fatty-acid desaturase
BBT120VS00	CmoCh13G011920	-3.60678	cyclic dof factor 3-like
BBT72VS00	CmoCh20G009630	-3.60567	Unknown protein
BBT72VS00	CmoCh13G001580	-3.60457	MYB domain class transcription factor
BBT72VS00	CmoCh07G010230	-3.60402	cation/H(+) antiporter 20-like
BBT12VS00	CmoCh18G008090	-3.60159	Xyloglucan endotransglucosylase/hydrolase
BBT72VS00	CmoCh18G007700	-3.59765	Unknown protein
BBT120VS00	CmoCh09G012770	-3.59545	ethylene-responsive transcription factor ERF022-like
BBT120VS00	CmoCh02G014220	-3.5954	Unknown protein
BBT72VS00	CmoCh18G001780	-3.5951	BTB/POZ and TAZ domain-containing protein 1-like
BBT72VS00	CmoCh12G003680	-3.58869	protein IQ-DOMAIN 32-like
BBT72VS00	CmoCh05G006450	-3.58291	protein kinase C-like zinc finger protein
BBT12VS00	CmoCh09G003250	-3.5794	Core-2/I-branching beta-1,6-N-acetylglucosaminyltransferase family protein
BBT120VS00	CmoCh04G023850	-3.57883	receptor protein kinase TMK1-like
BBT72VS00	CmoCh01G001360	-3.57718	Unknown protein
BBT72VS00	CmoCh03G013350	-3.5769	Unknown protein
BBT120VS00	CmoCh10G004370	-3.57496	Xyloglucan endotransglucosylase/hydrolase
BBT72VS00	CmoCh01G019860	-3.57257	jasmonate O-methyltransferase-like
BBT72VS00	CmoCh02G010360	-3.56885	Gibberellin 20-oxidase
BBT120VS00	CmoCh07G007120	-3.56701	PI-PLC X domain-containing protein At5g67130-like
BBT72VS00	CmoCh17G002100	-3.56545	type IV inositol polyphosphate 5-phosphatase 7-like
BBT120VS00	CmoCh13G007280	-3.56148	transcription factor ILR3-like
BBT120VS00	CmoCh19G010930	-3.56124	Xyloglucan endotransglucosylase/hydrolase
BBT12VS00	CmoCh13G005010	-3.56066	patellin-4
BBT72VS00	CmoCh18G004440	-3.55978	purine permease 10
BBT12VS00	CmoCh14G006670	-3.55933	Protein of unknown function (DUF1645)
BBT12VS00	CmoCh04G022010	-3.55718	Ribose-5-phosphate isomerase
BBT120VS00	CmoCh08G005180	-3.5557	Cellulose synthase
BBT120VS00	CmoCh19G007820	-3.55455	L-ascorbate oxidase homolog
BBT12VS00	CmoCh16G008660	-3.55154	Wound-responsive family protein
BBT120VS00	CmoCh13G005330	-3.54903	protein kinase PINOID-like
BBT72VS00	CmoCh03G003680	-3.54715	auxin transporter-like protein 4
BBT72VS00	CmoCh15G009460	-3.54462	transcription factor HBP-1b(C38)-like isoform X1
BBT72VS00	CmoCh11G011170	-3.54359	transcription factor bHLH63-like
BBT120VS00	CmoCh13G005600	-3.54225	protein TIFY 5A-like
BBT12VS00	CmoCh13G000930	-3.54112	Copper transporter
BBT72VS00	CmoCh19G008490	-3.54091	Glucose-1-phosphate adenylyltransferase
BBT12VS00	CmoCh07G007160	-3.54088	mitogen-activated protein kinase kinase kinase 17-like
BBT72VS00	CmoCh17G013530	-3.54046	light-regulated protein-like
BBT72VS00	CmoCh11G008710	-3.53931	zinc finger CCCH domain-containing protein 55
BBT72VS00	CmoCh20G010150	-3.53727	Unknown protein
BBT72VS00	CmoCh18G012680	-3.5348	remorin
BBT72VS00	CmoCh12G010830	-3.53363	protein ALWAYS EARLY 2-like isoform X1
BBT72VS00	CmoCh10G007060	-3.53259	(1->3)-beta-glucan endohydrolase
BBT12VS00	CmoCh06G010040	-3.53201	homeobox-leucine zipper protein HAT3-like
BBT72VS00	CmoCh10G004500	-3.52835	PTI1-like tyrosine-protein kinase At3g15890
BBT72VS00	CmoCh18G007710	-3.52798	octicosapeptide/Phox/Bem1p (PB1) domain-containing protein
BBT72VS00	CmoCh01G001950	-3.52754	ABC transporter C family member 13 isoform X1
BBT72VS00	CmoCh19G004540	-3.52722	two-component response regulator-like APRR2
BBT72VS00	CmoCh10G004490	-3.52406	CONSTANS-like zinc finger protein
BBT72VS00	CmoCh03G007320	-3.52196	S-adenosyl-L-methionine-dependent methyltransferases superfamily protein
BBT12VS00	CmoCh14G002260	-3.51963	zinc finger protein ZAT5-like
BBT12VS00	CmoCh11G004910	-3.51594	BEST Arabidopsis thaliana protein match is: NHL domain-containing protein .
BBT12VS00	CmoCh04G026910	-3.51413	protein ENHANCED DISEASE RESISTANCE 2-like
BBT72VS00	CmoCh04G027880	-3.5134	Membrane protein
BBT72VS00	CmoCh04G011710	-3.51339	S-adenosyl-L-methionine-dependent methyltransferases superfamily protein
BBT72VS00	CmoCh11G006340	-3.51221	Auxin-responsive protein
BBT72VS00	CmoCh02G000360	-3.51134	Chlorophyll a-b binding protein, chloroplastic
BBT120VS00	CmoCh02G002450	-3.5111	protein NUCLEAR FUSION DEFECTIVE 4-like
BBT12VS00	CmoCh01G006860	-3.50979	Phosphomethylpyrimidine synthase
BBT72VS00	CmoCh09G001850	-3.50854	cytochrome P450 CYP82D47-like
BBT120VS00	CmoCh03G004290	-3.50363	protein FAR-RED-ELONGATED HYPOCOTYL 1-LIKE-like
BBT12VS00	CmoCh03G009080	-3.50015	transcription factor bHLH19-like
BBT72VS00	CmoCh08G003060	-3.49977	phospholipase A1-Igamma1, chloroplastic
BBT72VS00	CmoCh06G004890	-3.49782	beta-fructofuranosidase, insoluble isoenzyme 1-like
BBT72VS00	CmoCh04G018130	-3.49699	2-methylene-furan-3-one reductase
BBT12VS00	CmoCh01G007060	-3.49209	Protein-serine/threonine phosphatase
BBT72VS00	CmoCh14G004810	-3.48926	remorin 4.1-like
BBT72VS00	CmoCh14G020510	-3.48898	Growth-regulating factor
BBT72VS00	CmoCh18G009970	-3.48824	Zinc finger, B-box
BBT120VS00	CmoCh05G004160	-3.4874	Protein of unknown function, DUF642
BBT12VS00	CmoCh17G011100	-3.48595	RNA-binding protein BRN1-like
BBT12VS00	CmoCh06G002100	-3.48357	Pyruvate decarboxylase
BBT72VS00	CmoCh14G009770	-3.4828	WD repeat-containing protein 6
BBT72VS00	CmoCh19G009860	-3.48213	SPARK domain-containing protein
BBT24VS00	CmoCh01G018680	-3.48165	Isoaspartyl peptidase/L-asparaginase
BBT72VS00	CmoCh09G009430	-3.48043	Plant/F10M23-360 protein
BBT12VS00	CmoCh04G003910	-3.48033	Cyclin
BBT120VS00	CmoCh02G009540	-3.47792	alcohol dehydrogenase-like 4
BBT72VS00	CmoCh15G003340	-3.47776	Leucine-rich repeat protein kinase family protein
BBT72VS00	CmoCh12G000870	-3.47663	MADS-box transcription factor
BBT72VS00	CmoCh14G022230	-3.47592	squamosa promoter-binding-like protein 7
BBT72VS00	CmoCh10G006750	-3.47018	Unknown protein
BBT120VS00	CmoCh05G001560	-3.46997	Gibberellin-regulated protein
BBT72VS00	CmoCh12G002900	-3.46923	Histone acetyltransferase
BBT120VS00	CmoCh07G013470	-3.46787	E3 ubiquitin-protein ligase RNF181-like
BBT72VS00	CmoCh05G000340	-3.46487	Unknown protein
BBT72VS00	CmoCh11G001720	-3.46293	Chlorophyll a-b binding protein, chloroplastic
BBT72VS00	CmoCh06G015050	-3.45997	Serine-rich adhesin for platelets
BBT72VS00	CmoCh12G003100	-3.45886	PPPDE domain-containing protein
BBT72VS00	CmoCh20G010070	-3.45509	Plant protein of unknown function (DUF863)
BBT12VS00	CmoCh02G013980	-3.45465	UDP-D-apiose/UDP-D-xylose synthase 2
BBT12VS00	CmoCh05G011000	-3.45281	dnaJ homolog subfamily B member 8-like
BBT72VS00	CmoCh07G000770	-3.45209	Unknown protein
BBT72VS00	CmoCh11G019280	-3.45162	Transcription factor, Myb superfamily
BBT12VS00	CmoCh05G003820	-3.45039	C2 NT-type domain-containing protein
BBT12VS00	CmoCh06G009850	-3.4497	Late cornified envelope protein 1E
BBT72VS00	CmoCh13G011920	-3.44781	cyclic dof factor 3-like
BBT72VS00	CmoCh04G023730	-3.44694	Psy2
BBT72VS00	CmoCh14G006410	-3.44663	gibberellin-regulated protein 14
BBT72VS00	CmoCh14G005040	-3.4462	cytochrome P450 94A1-like
BBT72VS00	CmoCh07G004840	-3.44539	Unknown protein
BBT72VS00	CmoCh07G010930	-3.44431	Chlorophyll a-b binding protein, chloroplastic
BBT12VS00	CmoCh12G012710	-3.44373	leucine-rich repeat extensin-like protein 4
BBT12VS00	CmoCh07G006400	-3.44323	Unknown protein
BBT72VS00	CmoCh01G007060	-3.44281	Protein-serine/threonine phosphatase
BBT24VS00	CmoCh01G002810	-3.44173	transcription factor MYB78-like
BBT72VS00	CmoCh10G006660	-3.44157	Ribonuclease P
BBT72VS00	CmoCh07G006690	-3.44034	LOB domain-containing protein
BBT72VS00	CmoCh03G014520	-3.43954	Unknown protein
BBT72VS00	CmoCh04G005340	-3.43938	ethylene-responsive transcription factor ERF109-like
BBT72VS00	CmoCh03G010280	-3.43679	Unknown protein
BBT72VS00	CmoCh09G011740	-3.43537	abscisic stress-ripening protein 2-like
BBT12VS00	CmoCh18G013490	-3.43425	Unknown protein
BBT72VS00	CmoCh11G012510	-3.43418	Unknown protein
BBT72VS00	CmoCh11G019720	-3.4318	Protein of unknown function (DUF688)
BBT12VS00	CmoCh01G008340	-3.43145	Chlorophyll a-b binding protein, chloroplastic
BBT72VS00	CmoCh06G001570	-3.43002	protein PIN-LIKES 7-like
BBT72VS00	CmoCh01G008290	-3.42992	cyclic dof factor 1-like
BBT72VS00	CmoCh16G001380	-3.42983	3-hexulose-6-phosphate isomerase
BBT12VS00	CmoCh08G007910	-3.42882	DnaJ-like protein subfamily B member 6-like
BBT72VS00	CmoCh02G003300	-3.42874	pentatricopeptide repeat-containing protein MRL1, chloroplastic
BBT72VS00	CmoCh18G001720	-3.42852	cytochrome P450 71A1-like
BBT12VS00	CmoCh07G013480	-3.42774	Unknown protein
BBT12VS00	CmoCh06G015490	-3.42746	COBRA-like protein 7
BBT12VS00	CmoCh19G001910	-3.42739	ninja-family protein 4-like
BBT72VS00	CmoCh09G004920	-3.42628	CHY-type/CTCHY-type/RING-type Zinc finger protein
BBT72VS00	CmoCh11G011820	-3.42019	dormancy-associated protein homolog 3-like isoform X1
BBT120VS00	CmoCh10G004540	-3.41826	Unknown protein
BBT120VS00	CmoCh08G012140	-3.41626	multiple organellar RNA editing factor 3, mitochondrial
BBT72VS00	CmoCh02G009540	-3.4155	alcohol dehydrogenase-like 4
BBT24VS00	CmoCh05G011110	-3.41503	F-box protein PP2-B15-like
BBT120VS00	CmoCh15G012620	-3.41432	ethylene-responsive transcription factor ERF027-like
BBT72VS00	CmoCh11G003440	-3.41332	extracellular ribonuclease isoform X3
BBT24VS00	CmoCh01G020290	-3.41223	gibberellin-regulated protein 1-like
BBT12VS00	CmoCh01G002360	-3.41141	Protein DETOXIFICATION
BBT72VS00	CmoCh13G008560	-3.40966	Bidirectional sugar transporter SWEET
BBT72VS00	CmoCh20G010940	-3.40627	terpene synthase 10-like
BBT120VS00	CmoCh01G016570	-3.40251	RNA-binding protein 38
BBT72VS00	CmoCh02G002450	-3.40099	protein NUCLEAR FUSION DEFECTIVE 4-like
BBT120VS00	CmoCh04G003910	-3.4008	Cyclin
BBT12VS00	CmoCh07G010770	-3.39726	phosphatidylinositol:ceramide inositolphosphotransferase 2-like
BBT12VS00	CmoCh01G011900	-3.39709	Lipocln_cytosolic_FA-bd_dom domain-containing protein
BBT12VS00	CmoCh01G013100	-3.39685	Plant protein of unknown function (DUF641)
BBT12VS00	CmoCh04G015830	-3.39574	ethylene-responsive transcription factor ERF118-like
BBT12VS00	CmoCh05G005300	-3.3945	protein EXORDIUM-like
BBT72VS00	CmoCh18G000510	-3.39422	Peptidylprolyl isomerase
BBT72VS00	CmoCh06G006860	-3.38999	Beta-amylase
BBT12VS00	CmoCh10G004790	-3.38952	histone-lysine N-methyltransferase ASHR3-like isoform X2
BBT72VS00	CmoCh11G002790	-3.38542	Unknown protein
BBT72VS00	CmoCh16G011920	-3.38434	Eukaryotic aspartyl protease family protein
BBT12VS00	CmoCh02G013060	-3.38342	Phosphotransferase
BBT72VS00	CmoCh06G014220	-3.38291	BRI1 kinase inhibitor 1
BBT24VS00	CmoCh16G005530	-3.38237	abscisic acid 8'-hydroxylase 1-like
BBT12VS00	CmoCh09G002010	-3.38062	transcription factor MYB44-like
BBT120VS00	CmoCh10G012330	-3.37978	calmodulin-binding protein 60 G-like
BBT72VS00	CmoCh20G011640	-3.37539	protein RALF-like 34
BBT72VS00	CmoCh11G017180	-3.37495	auxin-responsive protein SAUR21-like
BBT72VS00	CmoCh20G000260	-3.37421	Chlororespiratory reduction 42
BBT72VS00	CmoCh20G000270	-3.37421	Yippee domain-containing protein
BBT72VS00	CmoCh02G016560	-3.37388	abscisic acid receptor PYR1-like
BBT72VS00	CmoCh12G010270	-3.37011	acyl-CoA-binding domain-containing protein 4
BBT12VS00	CmoCh11G018760	-3.36609	fasciclin-like arabinogalactan protein 13
BBT12VS00	CmoCh16G002050	-3.36574	Trehalose 6-phosphate phosphatase
BBT72VS00	CmoCh05G013430	-3.36312	Peroxiredoxins prx-1 prx-2 prx-3
BBT12VS00	CmoCh02G004730	-3.36263	Cellulose synthase-like protein
BBT72VS00	CmoCh12G011520	-3.36142	protein WVD2-like 1
BBT72VS00	CmoCh08G012040	-3.35978	3-hydroxyacyl-CoA dehydrogenase
BBT72VS00	CmoCh18G001750	-3.35603	cytochrome P450 71A1-like
BBT72VS00	CmoCh11G018130	-3.35578	long chain acyl-CoA synthetase 8
BBT120VS00	CmoCh01G015860	-3.35038	Unknown protein
BBT72VS00	CmoCh07G003730	-3.3503	plant intracellular Ras-group-related LRR protein 4-like
BBT120VS00	CmoCh10G005920	-3.3484	protein NRT1/ PTR FAMILY 6.2-like
BBT72VS00	CmoCh04G028540	-3.34826	xyloglucan glycosyltransferase 4-like
BBT72VS00	CmoCh08G003320	-3.34818	protein MARD1-like
BBT12VS00	CmoCh08G004970	-3.34707	protein BPS1, chloroplastic-like
BBT72VS00	CmoCh19G009850	-3.3463	Cytochrome b6-f complex iron-sulfur subunit
BBT120VS00	CmoCh02G005240	-3.34492	BTB/POZ domain-containing protein
BBT72VS00	CmoCh10G007630	-3.34375	DDE Tnp4 domain-containing protein
BBT12VS00	CmoCh15G001750	-3.34179	Unknown protein
BBT12VS00	CmoCh14G012240	-3.34034	protein TIFY 10b-like
BBT72VS00	CmoCh06G014230	-3.34031	Unknown protein
BBT72VS00	CmoCh07G000620	-3.34005	Unknown protein
BBT120VS00	CmoCh14G001730	-3.34002	protein REVEILLE 8 isoform X2
BBT12VS00	CmoCh18G005100	-3.33811	UDP-arabinose 4-epimerase 1-like
BBT72VS00	CmoCh03G009900	-3.3368	Lipase_3 domain-containing protein
BBT72VS00	CmoCh04G021570	-3.33403	transcription factor HBP-1b(C38)-like isoform X1
BBT120VS00	CmoCh06G016490	-3.3303	serine/threonine-protein kinase-like protein ACR4
BBT120VS00	CmoCh04G030560	-3.32666	AAI domain-containing protein
BBT72VS00	CmoCh14G010000	-3.32538	Hydroxymethylbilane synthase
BBT120VS00	CmoCh01G002370	-3.32492	Unknown protein
BBT12VS00	CmoCh14G010440	-3.3227	O-fucosyltransferase family protein
BBT72VS00	CmoCh11G008040	-3.32107	Tyrosine-specific transport protein
BBT72VS00	CmoCh11G002780	-3.31726	synaptotagmin-5-like isoform X1
BBT120VS00	CmoCh07G000620	-3.31605	Unknown protein
BBT12VS00	CmoCh02G009490	-3.31602	NADP-specific glutamate dehydrogenase, putative
BBT12VS00	CmoCh19G009840	-3.31273	transcription factor MYB4-like
BBT72VS00	CmoCh14G008430	-3.31125	transcription factor MYB20-like
BBT72VS00	CmoCh16G009840	-3.30459	zinc finger CCCH domain-containing protein 18-like
BBT72VS00	CmoCh14G007420	-3.30267	protein LAZY 1-like
BBT72VS00	CmoCh06G015600	-3.30221	Phytochrome
BBT12VS00	CmoCh20G007960	-3.29989	auxin-responsive protein SAUR24-like
BBT72VS00	CmoCh18G009980	-3.29815	Unknown protein
BBT72VS00	CmoCh15G000040	-3.29811	50S ribosomal protein L18-like
BBT120VS00	CmoCh10G001110	-3.29785	Golgin subfamily A member 6-like protein 2
BBT72VS00	CmoCh18G013010	-3.29663	protein REVEILLE 6-like
BBT120VS00	CmoCh01G010080	-3.29593	UPF0496 protein 4
BBT120VS00	CmoCh12G008370	-3.29473	UDP-glucuronate 4-epimerase 1-like
BBT12VS00	CmoCh09G008790	-3.2947	receptor-like protein kinase THESEUS 1
BBT120VS00	CmoCh04G008980	-3.29357	classical arabinogalactan protein 9-like
BBT72VS00	CmoCh11G004680	-3.29147	Unknown protein
BBT120VS00	CmoCh14G001000	-3.2912	TIP41-like protein
BBT12VS00	CmoCh04G025770	-3.29032	protein GIGANTEA-like
BBT72VS00	CmoCh00G000140	-3.28756	disease resistance protein RGA2-like
BBT12VS00	CmoCh04G021540	-3.28688	Regulator of Vps4 activity in the MVB pathway protein
BBT72VS00	CmoCh01G002750	-3.28605	WD repeat-containing protein 6
BBT12VS00	CmoCh04G003150	-3.28513	zinc finger protein 5-like
BBT12VS00	CmoCh14G011320	-3.28474	UDP-glucose 6-dehydrogenase family protein
BBT72VS00	CmoCh11G013450	-3.28105	type IV secretion system protein virB10-like
BBT72VS00	CmoCh07G000460	-3.27838	protein LIGHT-DEPENDENT SHORT HYPOCOTYLS 4-like
BBT72VS00	CmoCh17G002480	-3.27289	Glucose-1-phosphate adenylyltransferase
BBT72VS00	CmoCh20G006530	-3.27246	O-methyltransferase family protein
BBT72VS00	CmoCh18G010980	-3.27141	transcription factor bHLH49-like
BBT72VS00	CmoCh20G010140	-3.27003	filament-like plant protein 7
BBT12VS00	CmoCh14G001020	-3.26985	protein NRT1/ PTR FAMILY 5.6-like
BBT12VS00	CmoCh01G010080	-3.26873	UPF0496 protein 4
BBT120VS00	CmoCh06G016500	-3.26851	Unknown protein
BBT120VS00	CmoCh01G007710	-3.26648	root phototropism protein 2
BBT72VS00	CmoCh12G004460	-3.26621	Unknown protein
BBT72VS00	CmoCh11G017640	-3.26612	signal recognition particle 43 kDa protein, chloroplastic-like
BBT72VS00	CmoCh01G004200	-3.2639	Mental retardation GTPase activating protein
BBT120VS00	CmoCh07G000760	-3.2637	Early-responsive to dehydration stress protein (ERD4)
BBT72VS00	CmoCh19G002330	-3.26282	homeobox-leucine zipper protein HDG5
BBT72VS00	CmoCh19G009970	-3.26228	NADH:ubiquinone reductase (non-electrogenic)
BBT72VS00	CmoCh04G012170	-3.26177	17.8 kDa class I heat shock protein-like
BBT120VS00	CmoCh10G004350	-3.25905	Xyloglucan endotransglucosylase/hydrolase
BBT72VS00	CmoCh11G017080	-3.25502	RNase H domain-containing protein
BBT12VS00	CmoCh04G025760	-3.25416	Unknown protein
BBT12VS00	CmoCh01G020270	-3.2541	C2H2-type domain-containing protein
BBT12VS00	CmoCh15G007610	-3.25383	Unknown protein
BBT72VS00	CmoCh03G013180	-3.25382	50S ribosomal protein L34, chloroplastic
BBT120VS00	CmoCh09G005270	-3.25143	U-box domain-containing protein 35-like
BBT12VS00	CmoCh08G007530	-3.25115	Unknown protein
BBT12VS00	CmoCh07G000520	-3.25017	Ethylene-responsive nuclear family protein
BBT72VS00	CmoCh12G003310	-3.25004	protein GLUTAMINE DUMPER 4-like
BBT72VS00	CmoCh15G013610	-3.24859	Auxin response factor
BBT72VS00	CmoCh17G002110	-3.24759	Homocysteine S-methyltransferase
BBT72VS00	CmoCh10G006670	-3.24645	Unknown protein
BBT72VS00	CmoCh04G004310	-3.24553	dicarboxylate transporter 2.1, chloroplastic-like
BBT72VS00	CmoCh07G004830	-3.24512	zinc-finger homeodomain protein 6-like
BBT72VS00	CmoCh04G016370	-3.24491	protein PHYLLO, chloroplastic isoform X2
BBT12VS00	CmoCh12G000070	-3.24342	Poly [ADP-ribose] polymerase
BBT12VS00	CmoCh15G001740	-3.24004	mini-chromosome maintenance complex-binding protein-like
BBT120VS00	CmoCh01G004500	-3.2398	Unknown protein
BBT120VS00	CmoCh18G007210	-3.23817	WD_REPEATS_REGION domain-containing protein
BBT120VS00	CmoCh05G004270	-3.23763	thermospermine synthase ACAULIS5
BBT12VS00	CmoCh16G009100	-3.23734	Thiamine thiazole synthase, chloroplastic
BBT12VS00	CmoCh01G001050	-3.23613	Avr9/Cf-9 rapidly elicited protein
BBT12VS00	CmoCh08G004480	-3.23547	Lipase_3 domain-containing protein
BBT120VS00	CmoCh09G007950	-3.23232	ethylene-responsive transcription factor ERF014-like
BBT72VS00	CmoCh09G006100	-3.22743	Auxin-responsive protein
BBT120VS00	CmoCh19G008800	-3.22693	Unknown protein
BBT12VS00	CmoCh15G009900	-3.22656	Unknown protein
BBT12VS00	CmoCh04G015840	-3.22646	ethylene-responsive transcription factor ERF118-like
BBT12VS00	CmoCh20G007090	-3.22507	protein EXORDIUM-like 5
BBT72VS00	CmoCh15G012640	-3.22489	Protein DETOXIFICATION
BBT12VS00	CmoCh15G009940	-3.22343	Unknown protein
BBT120VS00	CmoCh03G007320	-3.22268	S-adenosyl-L-methionine-dependent methyltransferases superfamily protein
BBT120VS00	CmoCh16G001560	-3.21721	Protein DETOXIFICATION
BBT72VS00	CmoCh16G001470	-3.21635	RHOMBOID-like protein
BBT12VS00	CmoCh08G006540	-3.20777	Regulator of Vps4 activity in the MVB pathway protein, putative
BBT72VS00	CmoCh17G013750	-3.20522	protein LAZY 1-like
BBT24VS00	CmoCh12G000070	-3.20403	Poly [ADP-ribose] polymerase
BBT72VS00	CmoCh04G012020	-3.20356	sedoheptulose-1,7-bisphosphatase, chloroplastic
BBT72VS00	CmoCh01G000920	-3.20288	Profilin
BBT120VS00	CmoCh03G004100	-3.20273	protein NRT1/ PTR FAMILY 5.6-like
BBT72VS00	CmoCh05G008690	-3.2011	photosynthetic NDH subunit of lumenal location 2, chloroplastic
BBT12VS00	CmoCh01G020370	-3.2009	thaumatin-like protein 1
BBT120VS00	CmoCh01G012420	-3.1996	receptor-like protein kinase THESEUS 1
BBT72VS00	CmoCh07G007590	-3.1995	oxygen-evolving enhancer protein 1, chloroplastic-like
BBT72VS00	CmoCh18G008090	-3.19881	Xyloglucan endotransglucosylase/hydrolase
BBT12VS00	CmoCh04G008000	-3.19854	GDP-mannose 4,6-dehydratase
BBT72VS00	CmoCh02G015590	-3.19763	1-aminocyclopropane-1-carboxylate synthase 1
BBT72VS00	CmoCh05G003810	-3.19367	LOW QUALITY PROTEIN: uncharacterized protein LOC103488318
BBT72VS00	CmoCh11G007230	-3.19212	DDE Tnp4 domain-containing protein
BBT12VS00	CmoCh01G020360	-3.19123	Pathogenesis-related thaumatin superfamily protein
BBT72VS00	CmoCh04G008590	-3.19114	FLZ-type domain-containing protein
BBT120VS00	CmoCh16G001580	-3.19078	dehydration-responsive element-binding protein 1A-like
BBT24VS00	CmoCh03G005100	-3.19063	F-box protein
BBT72VS00	CmoCh20G004870	-3.18919	phototropin-1-like
BBT72VS00	CmoCh03G007310	-3.18666	Unknown protein
BBT72VS00	CmoCh04G015910	-3.18388	AP2/ERF and B3 domain-containing transcription factor RAV1-like
BBT120VS00	CmoCh20G007090	-3.18369	protein EXORDIUM-like 5
BBT72VS00	CmoCh17G005210	-3.18154	protein TSS-like
BBT12VS00	CmoCh09G003100	-3.18125	AP2-like ethylene-responsive transcription factor ANT
BBT12VS00	CmoCh02G000790	-3.17492	protein CONSERVED ONLY IN THE GREEN LINEAGE 160, chloroplastic
BBT12VS00	CmoCh14G018000	-3.16883	Calmodulin
BBT120VS00	CmoCh20G009250	-3.16728	S-norcoclaurine synthase 1-like
BBT72VS00	CmoCh01G018300	-3.1665	DUF4378 domain-containing protein
BBT24VS00	CmoCh04G013260	-3.16559	Thioredoxin-like protein YLS8
BBT72VS00	CmoCh03G010920	-3.16441	WAT1-related protein
BBT72VS00	CmoCh10G002030	-3.16361	Transcription factor, TCP
BBT72VS00	CmoCh14G007770	-3.16302	Basic helix-loop-helix transcription factor
BBT72VS00	CmoCh16G004290	-3.16252	Unknown protein
BBT12VS00	CmoCh16G004610	-3.1608	Unknown protein
BBT72VS00	CmoCh08G012110	-3.15963	Protein DETOXIFICATION
BBT72VS00	CmoCh03G012610	-3.15917	Pentatricopeptide repeat-containing protein
BBT24VS00	CmoCh19G010300	-3.15813	Protein of unknown function (DUF506)
BBT120VS00	CmoCh12G008010	-3.15623	nucleobase-ascorbate transporter 12-like
BBT12VS00	CmoCh11G000610	-3.15527	leucine-rich repeat receptor-like serine/threonine/tyrosine-protein kinase SOBIR1
BBT120VS00	CmoCh04G009080	-3.15168	Xyloglucan endotransglucosylase/hydrolase
BBT12VS00	CmoCh07G006650	-3.15002	BTB/POZ and TAZ domain-containing protein 4-like
BBT120VS00	CmoCh12G002950	-3.1491	Bifunctional inhibitor/lipid-transfer protein/seed storage 2S albumin superfamily protein
BBT72VS00	CmoCh09G001500	-3.14869	protein RADIALIS-like 3
BBT12VS00	CmoCh05G007040	-3.14773	FGGY carbohydrate kinase domain-containing protein-like
BBT12VS00	CmoCh06G002520	-3.14622	O-fucosyltransferase family protein
BBT72VS00	CmoCh17G013550	-3.14594	protein LAX PANICLE 2-like
BBT120VS00	CmoCh01G015870	-3.1435	CHY-type/CTCHY-type/RING-type Zinc finger protein
BBT120VS00	CmoCh06G007900	-3.14323	Phenylalanine--tRNA ligase beta subunit
BBT72VS00	CmoCh12G003570	-3.1422	Tubulin beta chain
BBT120VS00	CmoCh12G012590	-3.14183	ABC transporter G family member 32-like
BBT72VS00	CmoCh16G002590	-3.14069	root phototropism protein 3-like
BBT24VS00	CmoCh07G010760	-3.14039	Unknown protein
BBT12VS00	CmoCh15G011500	-3.14012	Auxin-responsive protein
BBT12VS00	CmoCh05G011100	-3.13917	F-box protein PP2-B15-like
BBT120VS00	CmoCh04G015480	-3.13777	Protein DETOXIFICATION
BBT12VS00	CmoCh07G009300	-3.13772	heavy metal-associated isoprenylated plant protein 3-like
BBT72VS00	CmoCh13G005600	-3.13754	protein TIFY 5A-like
BBT72VS00	CmoCh20G005190	-3.13587	Aquaporin-like protein
BBT72VS00	CmoCh01G014410	-3.13413	ethylene-responsive transcription factor ERF014-like
BBT12VS00	CmoCh18G003400	-3.13398	CBS domain-containing protein CBSX5-like
BBT72VS00	CmoCh10G004350	-3.13169	Xyloglucan endotransglucosylase/hydrolase
BBT12VS00	CmoCh14G016020	-3.13125	Wall-associated receptor kinase
BBT120VS00	CmoCh14G010440	-3.13086	O-fucosyltransferase family protein
BBT12VS00	CmoCh06G012010	-3.13014	protein NRT1/ PTR FAMILY 7.3-like
BBT72VS00	CmoCh07G000580	-3.12977	Kinase, putative
BBT72VS00	CmoCh18G003100	-3.12956	oxygen-evolving enhancer protein 3-2, chloroplastic-like
BBT72VS00	CmoCh16G003180	-3.1295	Protein of unknown function (DUF1005)
BBT72VS00	CmoCh16G000510	-3.12827	Unknown protein
BBT12VS00	CmoCh07G005720	-3.12765	mitochondrial uncoupling protein 5-like
BBT72VS00	CmoCh10G012100	-3.12464	Bidirectional sugar transporter SWEET
BBT12VS00	CmoCh06G001830	-3.12288	50S ribosomal protein L35
BBT72VS00	CmoCh02G014390	-3.12048	Unknown protein
BBT12VS00	CmoCh04G003220	-3.11997	Hexosyltransferase
BBT72VS00	CmoCh11G009050	-3.11891	heat stress transcription factor B-4b-like
BBT12VS00	CmoCh02G014660	-3.11765	phosphoglycerate mutase-like protein AT74H
BBT72VS00	CmoCh14G012650	-3.1162	Growth-regulating factor
BBT12VS00	CmoCh18G005420	-3.11134	Exostosin domain-containing protein
BBT72VS00	CmoCh01G013100	-3.11097	Plant protein of unknown function (DUF641)
BBT12VS00	CmoCh19G000190	-3.1074	heat stress transcription factor A-6b-like
BBT24VS00	CmoCh13G010160	-3.10738	Tify domain-containing protein
BBT24VS00	CmoCh10G008090	-3.10644	protein TIFY 10a-like
BBT72VS00	CmoCh10G010170	-3.10592	metal tolerance protein 4
BBT120VS00	CmoCh01G008950	-3.10518	ethylene-responsive transcription factor ERF021-like
BBT12VS00	CmoCh16G001900	-3.10447	protein EXORDIUM-like 3
BBT24VS00	CmoCh15G009830	-3.10377	chaperone protein DnaJ-like isoform X1
BBT72VS00	CmoCh18G004590	-3.1037	Inositol transporter like
BBT12VS00	CmoCh12G008410	-3.10176	S-adenosyl-l-methionine decarboxylase leader peptide
BBT12VS00	CmoCh18G012110	-3.10163	DUF569 domain-containing protein
BBT12VS00	CmoCh04G022090	-3.09885	nudix hydrolase 17, mitochondrial-like
BBT72VS00	CmoCh07G008310	-3.0981	photosystem I reaction center subunit N, chloroplastic
BBT120VS00	CmoCh12G006110	-3.09729	Inactive purple acid phosphatase-like protein
BBT120VS00	CmoCh19G008790	-3.09726	Chlorophyll a-b binding protein, chloroplastic
BBT72VS00	CmoCh07G000760	-3.095	Early-responsive to dehydration stress protein (ERD4)
BBT72VS00	CmoCh07G000520	-3.09494	Ethylene-responsive nuclear family protein
BBT12VS00	CmoCh09G002810	-3.09396	Unknown protein
BBT72VS00	CmoCh04G021480	-3.09362	zinc finger protein CONSTANS-LIKE 16-like
BBT12VS00	CmoCh11G001290	-3.09046	transcription factor MYB1R1-like
BBT12VS00	CmoCh02G013650	-3.0902	zinc finger A20 and AN1 domain-containing stress-associated protein 3-like
BBT72VS00	CmoCh11G006960	-3.08922	tetraspanin-2-like
BBT120VS00	CmoCh14G022130	-3.08904	homeobox-leucine zipper protein HAT3-like
BBT72VS00	CmoCh17G008430	-3.08792	protein TSS
BBT72VS00	CmoCh04G012420	-3.08695	Pentatricopeptide repeat-containing protein, chloroplastic
BBT72VS00	CmoCh14G001270	-3.08657	Heat shock protein DnaJ, cysteine-rich domain containing protein
BBT72VS00	CmoCh02G010790	-3.08398	remorin-like
BBT12VS00	CmoCh04G012070	-3.08207	TPT domain-containing protein
BBT120VS00	CmoCh05G013450	-3.08145	heat stress transcription factor C-1-like
BBT72VS00	CmoCh15G001500	-3.08086	Clp R domain-containing protein
BBT72VS00	CmoCh08G005610	-3.07981	Protein of Unknown Function (DUF239)
BBT12VS00	CmoCh01G017550	-3.07868	fatty-acid-binding protein 2 isoform X1
BBT120VS00	CmoCh09G009100	-3.07831	scarecrow-like protein 21
BBT72VS00	CmoCh04G002560	-3.07768	receptor-like protein kinase HERK 1
BBT72VS00	CmoCh05G009490	-3.07613	Terpene cyclase/mutase family member
BBT12VS00	CmoCh02G005670	-3.07384	cyclin-dependent kinase inhibitor 7-like
BBT24VS00	CmoCh07G004420	-3.07206	cytochrome P450 84A1
BBT72VS00	CmoCh06G007280	-3.06958	ethylene-responsive transcription factor ERF026-like
BBT72VS00	CmoCh20G005810	-3.06936	Unknown protein
BBT72VS00	CmoCh01G006240	-3.06931	Unknown protein
BBT72VS00	CmoCh20G000950	-3.06785	photosystem II 5 kDa protein, chloroplastic
BBT120VS00	CmoCh15G002600	-3.06269	DUF1336 domain-containing protein
BBT72VS00	CmoCh04G001040	-3.06233	Expansin
BBT72VS00	CmoCh16G005560	-3.06192	Glutamine-rich protein 2
BBT72VS00	CmoCh15G008480	-3.05897	OMPdecase
BBT72VS00	CmoCh17G002970	-3.05215	Beta-amylase
BBT120VS00	CmoCh02G000360	-3.05214	Chlorophyll a-b binding protein, chloroplastic
BBT72VS00	CmoCh11G009210	-3.05133	Unknown protein
BBT72VS00	CmoCh06G017270	-3.0513	Cathepsin B-like
BBT120VS00	CmoCh06G005700	-3.05118	IQ domain-containing protein IQM6-like isoform X1
BBT12VS00	CmoCh14G008230	-3.05038	Regulator of Vps4 activity in the MVB pathway protein, putative
BBT72VS00	CmoCh07G005220	-3.05037	heavy metal-associated isoprenylated plant protein 23-like
BBT72VS00	CmoCh16G002600	-3.04844	root phototropism protein 3-like
BBT120VS00	CmoCh17G011600	-3.0476	Pentatricopeptide repeat-containing protein
BBT72VS00	CmoCh03G008080	-3.04712	protein ACTIVITY OF BC1 COMPLEX KINASE 8, chloroplastic-like
BBT72VS00	CmoCh11G007650	-3.04665	ethylene-responsive transcription factor ERF017-like
BBT72VS00	CmoCh15G008920	-3.0461	Pectinesterase
BBT120VS00	CmoCh20G006530	-3.04563	O-methyltransferase family protein
BBT12VS00	CmoCh08G012120	-3.04559	Unknown protein
BBT12VS00	CmoCh11G002880	-3.04457	LEAF RUST 10 DISEASE-RESISTANCE LOCUS RECEPTOR-LIKE PROTEIN KINASE-like 1.2
BBT120VS00	CmoCh04G018130	-3.04414	2-methylene-furan-3-one reductase
BBT72VS00	CmoCh04G023740	-3.04258	Sucrose synthase
BBT72VS00	CmoCh04G027050	-3.04238	Chlorophyll a-b binding protein, chloroplastic
BBT12VS00	CmoCh01G007760	-3.04018	Nudix hydrolase-like protein
BBT72VS00	CmoCh14G016520	-3.03997	Serine-rich adhesin for platelets
BBT12VS00	CmoCh04G012080	-3.03743	TPT domain-containing protein
BBT72VS00	CmoCh06G002390	-3.03696	transcription factor DIVARICATA-like
BBT72VS00	CmoCh01G008210	-3.0369	protein PHYTOCHROME KINASE SUBSTRATE 1-like
BBT72VS00	CmoCh10G002510	-3.03682	zinc finger protein CONSTANS-LIKE 6
BBT120VS00	CmoCh17G012600	-3.0361	Unknown protein
BBT72VS00	CmoCh11G019270	-3.03583	Unknown protein
BBT12VS00	CmoCh06G008550	-3.03517	FLZ-type domain-containing protein
BBT120VS00	CmoCh17G010220	-3.03305	DUF761 domain-containing protein
BBT12VS00	CmoCh13G010160	-3.03166	Tify domain-containing protein
BBT72VS00	CmoCh04G016530	-3.03088	Unknown protein
BBT120VS00	CmoCh07G000580	-3.03053	Kinase, putative
BBT72VS00	CmoCh08G012140	-3.02963	multiple organellar RNA editing factor 3, mitochondrial
BBT12VS00	CmoCh08G007520	-3.02901	serine/arginine repetitive matrix protein 1-like
BBT72VS00	CmoCh01G006250	-3.02893	Unknown protein
BBT12VS00	CmoCh11G003260	-3.02852	Unknown protein
BBT12VS00	CmoCh11G000420	-3.0282	EF hand calcium-binding family protein
BBT12VS00	CmoCh14G007770	-3.02811	Basic helix-loop-helix transcription factor
BBT120VS00	CmoCh11G001610	-3.02727	myb-related protein 306-like
BBT72VS00	CmoCh20G004730	-3.02676	3-ketoacyl-CoA synthase
BBT72VS00	CmoCh10G001550	-3.02455	Unknown protein
BBT12VS00	CmoCh11G004020	-3.02214	Xyloglucan endotransglucosylase/hydrolase
BBT72VS00	CmoCh19G008550	-3.01957	Unknown protein
BBT12VS00	CmoCh05G008860	-3.01937	phosphate transporter PHO1 homolog 3-like
BBT72VS00	CmoCh20G005800	-3.01842	Protein of unknown function (DUF789)
BBT72VS00	CmoCh20G005290	-3.01693	cyclic nucleotide-gated channel 15
BBT72VS00	CmoCh18G000670	-3.01526	C2H2-like zinc finger protein
BBT72VS00	CmoCh16G002580	-3.0143	Aspartyl/glutamyl-tRNA(Asn/Gln) amidotransferasesubunit B
BBT72VS00	CmoCh01G006860	-3.01225	Phosphomethylpyrimidine synthase
BBT72VS00	CmoCh00G000330	-3.00918	(1->3)-beta-glucan endohydrolase
BBT72VS00	CmoCh04G004250	-3.00878	root phototropism protein 3
BBT72VS00	CmoCh09G006000	-3.00808	Receptor-like protein kinase HSL1
BBT72VS00	CmoCh15G006070	-3.00755	Vacuolar iron transporter
BBT72VS00	CmoCh16G000730	-3.00512	RNA polymerase sigma factor sigE
BBT120VS00	CmoCh10G001550	-3.00462	Unknown protein
BBT12VS00	CmoCh15G012080	-3.00389	monocopper oxidase-like protein SKU5
BBT120VS00	CmoCh10G008090	-3.00305	protein TIFY 10a-like
BBT120VS00	CmoCh11G008150	-3.00222	Late embryogenesis abundant (LEA) hydroxyproline-rich glycoprotein family
BBT120VS00	CmoCh12G003570	-3.00107	Tubulin beta chain
BBT120VS00	CmoCh20G004640	-3.0009	zinc finger protein ZAT12-like
BBT72VS00	CmoCh17G003240	-3.00039	3-hydroxyacyl-CoA dehydrogenase
BBT72VS00	CmoCh02G017080	-3.00027	RING-type E3 ubiquitin transferase
BBT12VS00	CmoCh11G004390	-3.00017	heptahelical transmembrane protein 2
BBT72VS00	CmoCh09G000270	3.00027	short-chain dehydrogenase/reductase family 42E member 1-like
BBT24VS00	CmoCh04G006730	3.00129	Phytoene synthase
BBT12VS00	CmoCh11G016070	3.00193	WRKY protein
BBT72VS00	CmoCh08G007730	3.00264	Lipoxygenase
BBT120VS00	CmoCh03G001620	3.00293	Integrase catalytic domain-containing protein
BBT120VS00	CmoCh16G012800	3.00467	Endoglucanase
BBT120VS00	CmoCh08G011960	3.00471	flowering-promoting factor 1-like protein 1
BBT72VS00	CmoCh01G020640	3.00525	Arabidopsis protein of unknown function (DUF241)
BBT72VS00	CmoCh16G012790	3.0069	Unknown protein
BBT72VS00	CmoCh04G025530	3.00916	Unknown protein
BBT72VS00	CmoCh04G021930	3.00994	leucine-rich repeat extensin-like protein 1
BBT120VS00	CmoCh08G005880	3.01299	ethylene-responsive transcription factor ERF003-like
BBT72VS00	CmoCh07G006420	3.01372	Phytosulfokine-beta
BBT72VS00	CmoCh16G000880	3.01375	hevamine-A-like
BBT24VS00	CmoCh14G000170	3.0139	Transcription repressor
BBT72VS00	CmoCh03G006980	3.01535	protein POLLENLESS 3-LIKE 2-like
BBT120VS00	CmoCh04G026810	3.01617	Small polypeptide DEVIL 11
BBT72VS00	CmoCh11G017850	3.01703	Protein kinase domain-containing protein
BBT72VS00	CmoCh16G002130	3.01726	Unknown protein
BBT72VS00	CmoCh14G002370	3.01752	sporulation-specific protein 15-like isoform X1
BBT72VS00	CmoCh17G013370	3.01853	Glutathione gamma-glutamylcysteinyltransferase
BBT72VS00	CmoCh10G004630	3.019	transcription factor IBH1-like 1
BBT120VS00	CmoCh16G001950	3.01931	Plant invertase/pectin methylesterase inhibitor superfamily protein
BBT12VS00	CmoCh16G006600	3.01952	B-box zinc finger family protein
BBT72VS00	CmoCh18G005330	3.02083	protein PHLOEM PROTEIN 2-LIKE A9-like
BBT120VS00	CmoCh07G002850	3.02106	cysteine-rich receptor-like protein kinase 29
BBT72VS00	CmoCh06G017080	3.02165	Transaldolase
BBT72VS00	CmoCh15G015220	3.02194	Unknown protein
BBT12VS00	CmoCh09G003180	3.02439	transcription factor MYB36-like
BBT72VS00	CmoCh08G003710	3.02457	Histone H2A
BBT72VS00	CmoCh08G010030	3.02567	vesicle-associated membrane protein 722-like
BBT72VS00	CmoCh17G006930	3.02722	beta-fructofuranosidase, insoluble isoenzyme CWINV1-like
BBT120VS00	CmoCh16G001960	3.0285	Unknown protein
BBT72VS00	CmoCh04G007710	3.03295	1-aminocyclopropane-1-carboxylate synthase
BBT72VS00	CmoCh07G007390	3.03308	Unknown protein
BBT72VS00	CmoCh08G006870	3.03452	Ankyrin repeat-containing protein
BBT120VS00	CmoCh06G006850	3.0349	fasciclin-like arabinogalactan protein 1
BBT24VS00	CmoCh06G011760	3.03651	Pectinesterase
BBT72VS00	CmoCh07G009110	3.03677	Exostosin family protein
BBT72VS00	CmoCh01G011770	3.03826	Protein of unknown function, DUF584
BBT72VS00	CmoCh12G011730	3.03866	CBL-interacting serine/threonine-protein kinase 6
BBT72VS00	CmoCh13G001470	3.03893	phenolic glucoside malonyltransferase 1-like
BBT72VS00	CmoCh12G005200	3.03901	Leucine-rich receptor-like protein kinase family protein
BBT12VS00	CmoCh04G010760	3.03945	Encodes a protein whose expression is responsive to nematode infection, putative
BBT72VS00	CmoCh05G007950	3.04092	Unknown protein
BBT72VS00	CmoCh02G009150	3.04401	Endoglucanase
BBT24VS00	CmoCh04G010570	3.04444	MLP-like protein 328
BBT72VS00	CmoCh09G000500	3.04463	Unknown protein
BBT120VS00	CmoCh04G022560	3.04616	DUF629 domain-containing protein
BBT72VS00	CmoCh01G017050	3.04941	stromal cell-derived factor 2-like protein
BBT72VS00	CmoCh18G000280	3.04997	Phospholipid-transporting ATPase
BBT120VS00	CmoCh14G000370	3.05001	probably inactive leucine-rich repeat receptor-like protein kinase IMK2
BBT72VS00	CmoCh05G006250	3.05344	Ubiquitin-conjugating enzyme E2
BBT120VS00	CmoCh10G001650	3.05544	two-component response regulator ARR5-like
BBT120VS00	CmoCh05G011500	3.05646	microtubule-binding protein TANGLED
BBT24VS00	CmoCh11G014650	3.05715	protein PELPK1-like isoform X1
BBT120VS00	CmoCh17G008870	3.05733	4-coumarate--CoA ligase
BBT12VS00	CmoCh15G011570	3.0589	ethylene-responsive transcription factor 2-like
BBT120VS00	CmoCh06G009570	3.05903	NAC domain-containing protein 40-like
BBT72VS00	CmoCh02G011630	3.06059	dof zinc finger protein 1-like
BBT72VS00	CmoCh06G015620	3.06147	calmodulin
BBT72VS00	CmoCh20G009160	3.06186	transcription factor MYB41-like
BBT120VS00	CmoCh04G023660	3.06495	AMP dependent ligase
BBT72VS00	CmoCh14G001340	3.06582	Haloacid dehalogenase-like hydrolase (HAD) superfamily protein
BBT72VS00	CmoCh03G004640	3.06665	Ankyrin repeat-containing protein
BBT120VS00	CmoCh05G012840	3.06869	acidic mammalian chitinase-like
BBT72VS00	CmoCh13G002780	3.07063	protein argonaute 5
BBT72VS00	CmoCh11G018510	3.07105	rho GDP-dissociation inhibitor 1-like
BBT72VS00	CmoCh15G009710	3.07137	zinc finger CCCH domain-containing protein 15-like
BBT72VS00	CmoCh09G005220	3.07174	Sarcosine oxidase
BBT120VS00	CmoCh07G002930	3.07174	Patatin
BBT72VS00	CmoCh14G000370	3.07239	probably inactive leucine-rich repeat receptor-like protein kinase IMK2
BBT120VS00	CmoCh04G027830	3.07243	Small polypeptide DEVIL 11
BBT72VS00	CmoCh11G020160	3.07294	Tyrosine-protein phosphatase
BBT72VS00	CmoCh07G008810	3.07314	Unknown protein
BBT120VS00	CmoCh11G007880	3.07409	arabinogalactan peptide 13-like
BBT72VS00	CmoCh11G003550	3.07423	plant intracellular Ras-group-related LRR protein 6-like
BBT72VS00	CmoCh16G004060	3.07457	glutelin type-A 2-like
BBT72VS00	CmoCh03G013980	3.07516	RING-H2 finger protein ATL3
BBT72VS00	CmoCh00G001460	3.0777	Transmembrane protein, putative
BBT72VS00	CmoCh20G008110	3.07836	Unknown protein
BBT120VS00	CmoCh03G009730	3.07898	Cytochrome P450
BBT72VS00	CmoCh05G012860	3.07922	temperature-induced lipocalin-1-like
BBT72VS00	CmoCh12G005940	3.0798	WRKY domain-containing protein
BBT72VS00	CmoCh07G008220	3.08028	AAA domain-containing protein
BBT120VS00	CmoCh13G002950	3.08119	Plant protein of unknown function (DUF868)
BBT72VS00	CmoCh01G006570	3.08185	metal tolerance protein B-like
BBT120VS00	CmoCh13G007070	3.08223	Receptor-like serine/threonine-protein kinase
BBT12VS00	CmoCh04G012470	3.08234	Small polypeptide DEVIL 11
BBT72VS00	CmoCh17G007840	3.08441	Sulfate transporter, putative
BBT72VS00	CmoCh15G004140	3.08661	Glutamate dehydrogenase, NAD-specific
BBT72VS00	CmoCh07G000430	3.08963	UDP-arabinose 4-epimerase 1-like
BBT120VS00	CmoCh15G006570	3.0899	Calcium-binding EF-hand family protein
BBT72VS00	CmoCh14G018390	3.09067	1-aminocyclopropane-1-carboxylate oxidase homolog 1-like
BBT24VS00	CmoCh20G006090	3.09103	B box-type domain-containing protein
BBT120VS00	CmoCh01G003720	3.09241	Transmembrane protein
BBT120VS00	CmoCh05G007700	3.0947	cytochrome P450 CYP73A100-like
BBT12VS00	CmoCh01G014710	3.095	TPR repeat-containing thioredoxin TTL1-like
BBT120VS00	CmoCh17G008320	3.0962	cucumber peeling cupredoxin-like
BBT12VS00	CmoCh04G007940	3.09903	Zinc finger, B-box
BBT72VS00	CmoCh02G018240	3.09927	calmodulin-like
BBT12VS00	CmoCh04G009340	3.10137	Ferric reduction oxidase 7
BBT120VS00	CmoCh15G012800	3.10151	protein LURP-one-related 4-like
BBT120VS00	CmoCh18G005330	3.10158	protein PHLOEM PROTEIN 2-LIKE A9-like
BBT72VS00	CmoCh14G013280	3.10195	ABC transporter G family member 35-like
BBT72VS00	CmoCh05G006020	3.10361	early nodulin-93-like
BBT72VS00	CmoCh04G021260	3.10612	Unknown protein
BBT72VS00	CmoCh15G006940	3.10625	Unknown protein
BBT120VS00	CmoCh16G011930	3.10747	phosphatidylinositol/phosphatidylcholine transfer protein SFH11 isoform X1
BBT72VS00	CmoCh06G007770	3.10915	protein NSP-INTERACTING KINASE 2-like
BBT120VS00	CmoCh06G000470	3.11098	NADH:cytochrome B5 reductase 1
BBT24VS00	CmoCh13G001470	3.11458	phenolic glucoside malonyltransferase 1-like
BBT120VS00	CmoCh10G008600	3.11485	Tyrosine-protein phosphatase
BBT72VS00	CmoCh20G003000	3.11533	Filamentous hemagglutinin transporter
BBT72VS00	CmoCh13G007350	3.11544	cysteine-rich receptor-like protein kinase 10
BBT72VS00	CmoCh12G006140	3.11579	protein DELETION OF SUV3 SUPPRESSOR 1(I)-like
BBT24VS00	CmoCh17G003370	3.11601	major allergen Pru ar 1-like
BBT72VS00	CmoCh01G010340	3.11638	Alcohol dehydrogenase
BBT72VS00	CmoCh03G001700	3.1174	Mitochondrial fission 1 protein
BBT120VS00	CmoCh04G019710	3.1227	S-acyltransferase
BBT12VS00	CmoCh04G001630	3.12274	Plasma intrinsic protein 1-1
BBT72VS00	CmoCh20G003210	3.12332	transmembrane protein 56-B
BBT120VS00	CmoCh17G010560	3.12377	indole-3-acetic acid-induced protein ARG2-like
BBT72VS00	CmoCh13G004170	3.1243	Unknown protein
BBT120VS00	CmoCh06G003640	3.12759	Peroxidase
BBT72VS00	CmoCh04G029570	3.12812	6-phosphogluconate dehydrogenase, decarboxylating
BBT120VS00	CmoCh12G004790	3.12912	calmodulin-like protein 12
BBT72VS00	CmoCh04G021940	3.13065	extensin
BBT120VS00	CmoCh14G015050	3.13093	Aldo_ket_red domain-containing protein
BBT24VS00	CmoCh11G015630	3.13193	nudix hydrolase 13, mitochondrial-like
BBT72VS00	CmoCh04G007680	3.13212	WRKY protein
BBT12VS00	CmoCh06G011760	3.13285	Pectinesterase
BBT12VS00	CmoCh05G012860	3.13305	temperature-induced lipocalin-1-like
BBT72VS00	CmoCh14G016240	3.1338	Ubiquitin-conjugating enzyme E2 32
BBT120VS00	CmoCh13G005410	3.13401	Remorin_C domain-containing protein
BBT72VS00	CmoCh04G029660	3.13736	Endo-1,3(4)-beta-glucanase
BBT72VS00	CmoCh16G010160	3.13851	Unknown protein
BBT72VS00	CmoCh16G002710	3.14151	Ubiquinol oxidase
BBT120VS00	CmoCh14G010200	3.14202	Late embryogenesis abundant protein, group 2
BBT72VS00	CmoCh16G006870	3.14251	Mitogen-activated protein kinase
BBT120VS00	CmoCh14G012180	3.14432	cytochrome P450 71A1-like
BBT72VS00	CmoCh06G003110	3.14505	short-chain dehydrogenase TIC 32, chloroplastic-like
BBT72VS00	CmoCh12G006330	3.14507	Protein kinase domain-containing protein
BBT12VS00	CmoCh08G009240	3.14733	Protein of unknown function (DUF1442)
BBT72VS00	CmoCh02G016220	3.14867	Protein kinase domain-containing protein
BBT12VS00	CmoCh08G006170	3.14904	gibberellin 3-beta-dioxygenase 1-like
BBT72VS00	CmoCh01G014270	3.15056	nuclear receptor subfamily 4 group A member 3-like
BBT120VS00	CmoCh04G017920	3.15059	Unknown protein
BBT120VS00	CmoCh18G011180	3.15191	Adenine nucleotide alpha hydrolases-like superfamily protein
BBT72VS00	CmoCh11G018990	3.15335	Aconitate hydratase
BBT72VS00	CmoCh15G015120	3.15379	Late embryogenesis abundant protein
BBT12VS00	CmoCh01G002480	3.15443	Ribosomal protein
BBT72VS00	CmoCh14G017610	3.15547	protein CDC73 homolog
BBT72VS00	CmoCh16G010120	3.15693	Unknown protein
BBT24VS00	CmoCh02G001810	3.15738	Cellulose synthase
BBT120VS00	CmoCh02G011180	3.15752	acidic endochitinase-like
BBT72VS00	CmoCh14G015840	3.15792	1,4-dihydroxy-2-naphthoyl-CoA thioesterase 1-like
BBT72VS00	CmoCh14G007180	3.15867	TLC domain-containing protein
BBT72VS00	CmoCh17G009750	3.15943	Unknown protein
BBT12VS00	CmoCh04G009350	3.16138	Ty3-gypsy retrotransposon protein
BBT72VS00	CmoCh13G007760	3.16215	5'-adenylylsulfate reductase 1
BBT12VS00	CmoCh17G010130	3.16513	Multidrug resistance protein ABC transporter family protein, putative
BBT120VS00	CmoCh03G007540	3.16795	heavy metal-associated isoprenylated plant protein 43-like
BBT72VS00	CmoCh17G012410	3.16927	RPM1-interacting protein 4-like
BBT120VS00	CmoCh14G001340	3.16949	Haloacid dehalogenase-like hydrolase (HAD) superfamily protein
BBT72VS00	CmoCh10G010720	3.17017	Protein kinase domain-containing protein
BBT12VS00	CmoCh12G007990	3.17023	Plant protein of unknown function (DUF868)
BBT72VS00	CmoCh08G002360	3.1739	serine/threonine-protein kinase OXI1
BBT12VS00	CmoCh14G016420	3.17574	ethylene-responsive transcription factor ERF071-like
BBT72VS00	CmoCh02G006450	3.17815	Glutathione transferase
BBT72VS00	CmoCh13G000080	3.17844	Methyltransferase-related protein, putative
BBT120VS00	CmoCh08G003750	3.18063	Glutamic acid-rich protein
BBT72VS00	CmoCh18G003480	3.18095	Protein kinase domain-containing protein
BBT72VS00	CmoCh15G011630	3.18124	DUF1639 family protein
BBT72VS00	CmoCh02G005160	3.18159	cytochrome P450 81F3
BBT120VS00	CmoCh16G010160	3.18329	Unknown protein
BBT120VS00	CmoCh03G003950	3.18398	glutathione S-transferase U8-like
BBT120VS00	CmoCh09G005360	3.18711	Pentatricopeptide repeat-containing protein
BBT72VS00	CmoCh12G001150	3.18723	Glycosyl hydrolase family protein
BBT72VS00	CmoCh04G030590	3.18802	Delta-1-pyrroline-5-carboxylate synthase
BBT72VS00	CmoCh14G004020	3.18948	Dirigent protein
BBT72VS00	CmoCh13G005420	3.19023	Unknown protein
BBT72VS00	CmoCh18G006310	3.19116	Protein of unknown function (DUF579)
BBT72VS00	CmoCh01G004360	3.19141	2-hydroxyacyl-CoA lyase-like
BBT72VS00	CmoCh18G005270	3.19169	BOI-related E3 ubiquitin-protein ligase 1-like
BBT72VS00	CmoCh20G000500	3.19307	Peroxidase
BBT72VS00	CmoCh19G011220	3.194	Protein kinase domain-containing protein
BBT72VS00	CmoCh04G024030	3.19535	Plastid movement impaired 2
BBT120VS00	CmoCh08G010620	3.19615	ethylene-responsive transcription factor 1B-like
BBT72VS00	CmoCh12G001790	3.19768	Protein DETOXIFICATION
BBT120VS00	CmoCh19G008710	3.19807	sodium/potassium/calcium exchanger 1-like
BBT72VS00	CmoCh10G007000	3.19863	receptor-like protein kinase 5
BBT120VS00	CmoCh20G003420	3.19951	Peroxidase
BBT120VS00	CmoCh03G001630	3.20115	Unknown protein
BBT120VS00	CmoCh03G003010	3.20197	High mobility group B protein 6
BBT72VS00	CmoCh06G013400	3.20237	2-oxoglutarate (2OG) and Fe(II)-dependent oxygenase superfamily protein
BBT72VS00	CmoCh12G001960	3.20484	Malic enzyme
BBT72VS00	CmoCh12G001270	3.20587	Phospho-2-dehydro-3-deoxyheptonate aldolase
BBT72VS00	CmoCh01G018680	3.20625	Isoaspartyl peptidase/L-asparaginase
BBT120VS00	CmoCh09G000490	3.20689	WUSCHEL-related homeobox 8-like
BBT72VS00	CmoCh07G012710	3.20995	adenine/guanine permease AZG1-like
BBT72VS00	CmoCh20G008120	3.21022	Arginine decarboxylase
BBT72VS00	CmoCh06G000220	3.21059	sigma factor binding protein 2, chloroplastic-like
BBT12VS00	CmoCh16G004060	3.21135	glutelin type-A 2-like
BBT72VS00	CmoCh17G000390	3.21177	Transketolase
BBT12VS00	CmoCh14G014960	3.2122	Protein of unknown function (DUF 3339)
BBT72VS00	CmoCh07G002860	3.21531	cysteine-rich receptor-like protein kinase 29
BBT120VS00	CmoCh01G004350	3.2155	Unknown protein
BBT72VS00	CmoCh11G000460	3.21592	Zn-dependent exopeptidases superfamily protein
BBT24VS00	CmoCh07G004700	3.2163	heavy metal-associated isoprenylated plant protein 43-like
BBT72VS00	CmoCh02G001710	3.21697	Glutamate receptor
BBT12VS00	CmoCh11G001050	3.21736	aldehyde dehydrogenase 2B4
BBT24VS00	CmoCh08G005420	3.21848	Unknown protein
BBT72VS00	CmoCh14G004100	3.22215	LOW QUALITY PROTEIN: uncharacterized protein LOC111024852
BBT72VS00	CmoCh17G009740	3.22298	tolB protein-related
BBT120VS00	CmoCh04G005800	3.22404	protein BRASSINOSTEROID INSENSITIVE 1-like
BBT120VS00	CmoCh04G027910	3.2252	Pectate lyase
BBT72VS00	CmoCh13G011050	3.22935	Unknown protein
BBT72VS00	CmoCh08G009620	3.23252	MLO-like protein
BBT72VS00	CmoCh04G008990	3.23368	Protein DETOXIFICATION
BBT72VS00	CmoCh07G008210	3.23394	Aminotran_5 domain-containing protein
BBT72VS00	CmoCh15G002530	3.23525	TPX2 domain-containing protein
BBT120VS00	CmoCh01G018180	3.23756	Myb transcription factor
BBT12VS00	CmoCh01G020400	3.2379	Unknown protein
BBT72VS00	CmoCh16G004990	3.23833	Glutathione S-transferase
BBT120VS00	CmoCh15G014710	3.23871	receptor-like protein 12 isoform X2
BBT12VS00	CmoCh07G006810	3.2395	ARM-repeat/Tetratricopeptide repeat-like protein
BBT72VS00	CmoCh09G005530	3.24108	Glycosyltransferase
BBT120VS00	CmoCh08G004820	3.24145	protein NIM1-INTERACTING 1
BBT72VS00	CmoCh11G005850	3.24158	Unknown protein
BBT72VS00	CmoCh06G013340	3.24332	ethylene-responsive transcription factor 1B-like
BBT120VS00	CmoCh05G005410	3.24359	Unknown protein
BBT72VS00	CmoCh15G011390	3.24405	cucumisin-like
BBT120VS00	CmoCh10G007530	3.24577	BHLH domain-containing protein
BBT72VS00	CmoCh07G011690	3.24849	NADH--cytochrome b5 reductase 1-like
BBT72VS00	CmoCh19G006520	3.24929	Transducin/WD40 repeat-like superfamily protein
BBT120VS00	CmoCh11G006140	3.24949	Unknown protein
BBT72VS00	CmoCh07G010570	3.25218	NAD(P)-linked oxidoreductase superfamily protein
BBT72VS00	CmoCh01G009170	3.25327	Protein disulfide isomerase (PDI)-like protein 3
BBT72VS00	CmoCh03G012270	3.25607	Phenylalanine ammonia-lyase
BBT72VS00	CmoCh06G015720	3.2569	Unknown protein
BBT72VS00	CmoCh16G002510	3.26203	metacaspase-1-like
BBT120VS00	CmoCh15G006220	3.26455	N66 matrix protein-like isoform X1
BBT72VS00	CmoCh07G005550	3.26465	Phospho-2-dehydro-3-deoxyheptonate aldolase
BBT72VS00	CmoCh20G003380	3.26825	Non-specific serine/threonine protein kinase
BBT72VS00	CmoCh01G013690	3.2683	3-hydroxyisobutyryl-CoA hydrolase-like protein 5
BBT72VS00	CmoCh19G003100	3.26956	Actin
BBT72VS00	CmoCh06G009560	3.26958	NAC domain-containing protein 40-like
BBT120VS00	CmoCh01G012480	3.27227	NAC domain-containing protein
BBT72VS00	CmoCh07G008590	3.2731	COPII coat assembly protein SEC16, putative
BBT120VS00	CmoCh14G013560	3.27435	pleiotropic drug resistance protein 1-like
BBT72VS00	CmoCh07G001670	3.27467	precursor of CEP14
BBT24VS00	CmoCh07G006810	3.28033	ARM-repeat/Tetratricopeptide repeat-like protein
BBT120VS00	CmoCh19G000890	3.28034	LOB domain-containing protein 16-like
BBT120VS00	CmoCh11G007680	3.28064	Sucrose synthase
BBT72VS00	CmoCh07G008050	3.28077	WAT1-related protein
BBT120VS00	CmoCh05G007840	3.28163	Endoglucanase
BBT72VS00	CmoCh05G006070	3.28301	Unknown protein
BBT72VS00	CmoCh04G003140	3.28407	IAA-amino acid hydrolase ILR1-like 1
BBT72VS00	CmoCh16G004800	3.28412	ABC transporter-like protein
BBT72VS00	CmoCh03G007990	3.28447	NAD(P)H dehydrogenase (quinone)
BBT120VS00	CmoCh15G015080	3.28503	WAT1-related protein
BBT12VS00	CmoCh17G005320	3.28815	protein LHY isoform X1
BBT72VS00	CmoCh03G003860	3.2888	mitochondrial uncoupling protein 1-like
BBT12VS00	CmoCh14G018210	3.2894	Inhibitor of trypsin and hageman factor-like
BBT72VS00	CmoCh11G017780	3.29102	Protein DETOXIFICATION
BBT120VS00	CmoCh15G011720	3.29457	cucumisin-like
BBT72VS00	CmoCh01G016010	3.29682	Cryptochrome DASH
BBT12VS00	CmoCh07G004700	3.29905	heavy metal-associated isoprenylated plant protein 43-like
BBT120VS00	CmoCh17G001160	3.30025	vesicle-associated membrane protein 722-like
BBT72VS00	CmoCh20G006120	3.3006	Peroxidase
BBT72VS00	CmoCh14G018740	3.30483	protein NRT1/ PTR FAMILY 5.2-like
BBT120VS00	CmoCh19G000750	3.30489	Pumpkin fruit trypsin inhibitor
BBT120VS00	CmoCh14G018800	3.30497	acid phosphatase 1-like
BBT72VS00	CmoCh03G006470	3.30533	MLO-like protein
BBT24VS00	CmoCh03G003080	3.30551	Protein kinase domain-containing protein
BBT120VS00	CmoCh06G008600	3.30629	haloacid dehalogenase-like hydrolase domain-containing protein Sgpp
BBT72VS00	CmoCh02G007270	3.30842	UDP-glycosyltransferase 87A2-like
BBT72VS00	CmoCh15G004730	3.30906	GATA transcription factor 8-like
BBT12VS00	CmoCh02G000180	3.30926	transcription factor JUNGBRUNNEN 1-like
BBT12VS00	CmoCh13G001470	3.30991	phenolic glucoside malonyltransferase 1-like
BBT72VS00	CmoCh06G014520	3.31016	Procollagen-proline 4-dioxygenase
BBT120VS00	CmoCh15G006360	3.31451	Bidirectional sugar transporter SWEET
BBT72VS00	CmoCh20G000890	3.3157	Unknown protein
BBT120VS00	CmoCh04G022580	3.31645	Glutamate decarboxylase
BBT120VS00	CmoCh16G013330	3.31793	Dirigent protein
BBT72VS00	CmoCh04G017070	3.31861	protein NRT1/ PTR FAMILY 4.6-like
BBT120VS00	CmoCh09G007510	3.31934	protein MODIFYING WALL LIGNIN-2-like
BBT120VS00	CmoCh19G000970	3.32535	ethylene-responsive transcription factor 1B-like
BBT72VS00	CmoCh04G009910	3.32557	calmodulin-like
BBT72VS00	CmoCh20G008570	3.33222	transcription factor HBI1-like isoform X1
BBT72VS00	CmoCh16G008950	3.33622	2-iminobutanoate/2-iminopropanoate deaminase-like
BBT24VS00	CmoCh04G010600	3.33806	MLP-like protein 329
BBT120VS00	CmoCh03G009380	3.33811	Growth-regulating factor
BBT120VS00	CmoCh11G009910	3.33897	L-allo-threonine aldolase
BBT12VS00	CmoCh17G003000	3.33994	Glutaredoxin
BBT72VS00	CmoCh04G012890	3.34168	Exocyst subunit Exo70 family protein
BBT120VS00	CmoCh02G006450	3.34246	Glutathione transferase
BBT120VS00	CmoCh01G000320	3.3426	cytochrome P450 71A1-like
BBT72VS00	CmoCh17G013120	3.34292	ethylene-responsive transcription factor ERF098-like
BBT72VS00	CmoCh01G001900	3.34765	cinnamoyl coa reductase
BBT120VS00	CmoCh16G004060	3.3483	glutelin type-A 2-like
BBT72VS00	CmoCh20G010760	3.34849	VQ domain-containing protein
BBT72VS00	CmoCh15G011620	3.34906	Unknown protein
BBT72VS00	CmoCh16G006300	3.34997	WRKY protein
BBT72VS00	CmoCh05G003550	3.35038	WRKY protein
BBT120VS00	CmoCh01G016670	3.35285	SKI/DACH domain-containing protein 1
BBT120VS00	CmoCh01G004800	3.35299	hydroxyproline-rich glycoprotein family protein
BBT24VS00	CmoCh17G008810	3.3605	AP2-like ethylene-responsive transcription factor
BBT72VS00	CmoCh04G022270	3.36084	MACPF domain-containing protein
BBT72VS00	CmoCh11G007530	3.36241	Methylthioribose-1-phosphate isomerase
BBT120VS00	CmoCh15G005930	3.36598	ethylene-responsive transcription factor ERF110-like
BBT120VS00	CmoCh10G005750	3.36607	cucumber peeling cupredoxin-like
BBT72VS00	CmoCh11G020510	3.36611	Unknown protein
BBT72VS00	CmoCh08G003870	3.36713	Unknown protein
BBT120VS00	CmoCh20G006090	3.36789	B box-type domain-containing protein
BBT12VS00	CmoCh02G012500	3.36898	Peroxidase
BBT72VS00	CmoCh01G003900	3.37049	Glutamine synthetase
BBT120VS00	CmoCh04G020320	3.37438	calmodulin-like
BBT120VS00	CmoCh01G008240	3.37715	Mini zinc finger
BBT72VS00	CmoCh03G010550	3.38027	Unknown protein
BBT72VS00	CmoCh03G012290	3.38465	Phenylalanine ammonia-lyase
BBT72VS00	CmoCh15G012260	3.38873	Protein of unknown function (DUF1442)
BBT72VS00	CmoCh15G000480	3.38884	Unknown protein
BBT12VS00	CmoCh04G012420	3.38956	Pentatricopeptide repeat-containing protein, chloroplastic
BBT72VS00	CmoCh17G010130	3.39272	Multidrug resistance protein ABC transporter family protein, putative
BBT72VS00	CmoCh02G012520	3.39277	Peroxidase
BBT72VS00	CmoCh20G001210	3.39323	Hydroxyproline O-arabinosyltransferase 3
BBT72VS00	CmoCh11G011520	3.39368	phosphoglycerate mutase-like protein AT74
BBT72VS00	CmoCh14G020860	3.39476	Acetyl-CoA carboxytransferase
BBT72VS00	CmoCh02G001770	3.39792	Arogenate dehydratase
BBT24VS00	CmoCh16G004060	3.39917	glutelin type-A 2-like
BBT72VS00	CmoCh13G010560	3.39925	protein SAR DEFICIENT 1 isoform X1
BBT120VS00	CmoCh14G016090	3.40143	transcription factor MYB78-like
BBT120VS00	CmoCh15G000470	3.4026	LL-diaminopimelate aminotransferase
BBT120VS00	CmoCh19G000660	3.40261	Pumpkin fruit trypsin inhibitor
BBT72VS00	CmoCh01G000730	3.40325	Glutamate receptor
BBT120VS00	CmoCh16G002100	3.40377	Unknown protein
BBT72VS00	CmoCh12G002830	3.40389	Nucleotide-sugar transporter family protein
BBT72VS00	CmoCh09G009550	3.40538	heterodimeric geranylgeranyl pyrophosphate synthase small subunit, chloroplastic-like
BBT12VS00	CmoCh08G005430	3.40662	Beta-glucosidase
BBT72VS00	CmoCh01G003220	3.40831	Unknown protein
BBT120VS00	CmoCh11G019150	3.41262	cysteine-rich repeat secretory protein 38-like
BBT120VS00	CmoCh08G004720	3.41663	WRKY transcription factor
BBT120VS00	CmoCh04G024830	3.4188	Protein disulfide-isomerase
BBT120VS00	CmoCh05G002160	3.42349	dof zinc finger protein DOF3.4-like
BBT72VS00	CmoCh04G025100	3.42429	Calcium-binding EF-hand family protein
BBT72VS00	CmoCh18G007500	3.42451	cytochrome P450 71B19-like
BBT120VS00	CmoCh11G007150	3.42474	IQ domain-containing protein IQM1-like
BBT72VS00	CmoCh07G006430	3.42617	ACT domain-containing protein ACR1-like
BBT72VS00	CmoCh20G008560	3.42801	Adenine nucleotide alpha hydrolases-like superfamily protein
BBT12VS00	CmoCh14G001930	3.42984	Peroxidase
BBT24VS00	CmoCh06G013820	3.43001	early light-induced protein 1, chloroplastic-like
BBT72VS00	CmoCh13G007990	3.43017	Pectate lyase
BBT72VS00	CmoCh15G002950	3.43143	Glutaredoxin domain-containing protein
BBT120VS00	CmoCh06G016310	3.43194	extensin-2-like
BBT72VS00	CmoCh11G004780	3.43506	Protein of unknown function (DUF679)
BBT72VS00	CmoCh07G000910	3.4365	endoplasmic reticulum oxidoreductin-1-like
BBT72VS00	CmoCh06G000990	3.43835	Protein kinase domain-containing protein
BBT120VS00	CmoCh02G003990	3.4385	isoflavone reductase-like protein
BBT72VS00	CmoCh04G003620	3.44088	Aconitate hydratase
BBT120VS00	CmoCh08G008380	3.44211	Glycosyltransferase
BBT12VS00	CmoCh17G003340	3.4448	Protein phosphatase 2C family protein
BBT72VS00	CmoCh03G001630	3.44875	Unknown protein
BBT120VS00	CmoCh17G012780	3.44973	dCTP pyrophosphatase 1
BBT120VS00	CmoCh02G012440	3.45043	Dirigent protein
BBT72VS00	CmoCh16G007800	3.45143	ATP-dependent 6-phosphofructokinase
BBT72VS00	CmoCh06G000790	3.45432	bZIP transcription factor TGA10-like
BBT72VS00	CmoCh07G003110	3.4564	WRKY transcription factor 2-like protein
BBT72VS00	CmoCh18G011860	3.46278	F-box/kelch-repeat protein SKIP11-like
BBT72VS00	CmoCh11G019000	3.46383	Aconitate hydratase
BBT12VS00	CmoCh02G001100	3.46764	ethylene-responsive transcription factor ERF054-like
BBT72VS00	CmoCh17G011150	3.47148	Histone H2A
BBT72VS00	CmoCh03G003120	3.47154	Unknown protein
BBT72VS00	CmoCh10G007790	3.47196	Mechanosensitive ion channel protein
BBT72VS00	CmoCh05G011510	3.47385	mitogen-activated protein kinase kinase kinase NPK1
BBT120VS00	CmoCh11G006130	3.4764	Unknown protein
BBT120VS00	CmoCh01G011470	3.48226	Sodium/hydrogen exchanger
BBT72VS00	CmoCh14G000040	3.48252	Serine/threonine-protein phosphatase
BBT12VS00	CmoCh04G012410	3.4836	ribulose bisphosphate carboxylase/oxygenase activase, chloroplastic
BBT120VS00	CmoCh07G012580	3.48582	receptor-like protein kinase FERONIA
BBT72VS00	CmoCh04G022070	3.48687	Polcalcin Jun o
BBT120VS00	CmoCh18G004480	3.48852	gibberellin 2-beta-dioxygenase-like
BBT72VS00	CmoCh17G009090	3.4892	Unknown protein
BBT120VS00	CmoCh11G008420	3.49039	beta-glucosidase 12-like
BBT120VS00	CmoCh06G001950	3.49301	Short-chain dehydrogenase/reductase
BBT120VS00	CmoCh04G024820	3.49349	Unknown protein
BBT72VS00	CmoCh01G002280	3.49392	Ras-related protein
BBT72VS00	CmoCh05G010530	3.49455	leucine aminopeptidase 2, chloroplastic-like
BBT72VS00	CmoCh16G000170	3.49587	Unknown protein
BBT72VS00	CmoCh15G006790	3.49671	Protein disulfide-isomerase
BBT72VS00	CmoCh14G017420	3.49679	Receptor-like serine/threonine-protein kinase
BBT120VS00	CmoCh01G005430	3.49684	Xyloglucan endotransglucosylase/hydrolase
BBT24VS00	CmoCh18G004080	3.49707	WRKY protein
BBT72VS00	CmoCh01G002710	3.49835	Protein kinase superfamily protein
BBT72VS00	CmoCh14G010610	3.50365	Unknown protein
BBT72VS00	CmoCh17G013460	3.5089	ethylene-responsive transcription factor ERF113-like
BBT120VS00	CmoCh18G011750	3.51151	Protein of unknown function (DUF1666)
BBT72VS00	CmoCh02G001800	3.51175	mitogen-activated protein kinase kinase kinase 18-like
BBT12VS00	CmoCh01G007710	3.51384	root phototropism protein 2
BBT72VS00	CmoCh16G002120	3.51516	MDIS1-interacting receptor like kinase 2-like
BBT120VS00	CmoCh13G007100	3.52344	Receptor-like serine/threonine-protein kinase
BBT72VS00	CmoCh20G006940	3.52737	heavy metal-associated isoprenylated plant protein 16-like
BBT120VS00	CmoCh12G009560	3.52817	ABC transporter B family member 4-like
BBT72VS00	CmoCh06G011760	3.52836	Pectinesterase
BBT12VS00	CmoCh12G003380	3.53464	Thioredoxin
BBT72VS00	CmoCh06G010510	3.53615	Glycosyltransferase
BBT120VS00	CmoCh05G010000	3.5379	Unknown protein
BBT120VS00	CmoCh16G008020	3.53812	1-deoxy-D-xylulose-5-phosphate synthase
BBT72VS00	CmoCh15G004370	3.53908	Unknown protein
BBT72VS00	CmoCh16G008670	3.5392	Diacylglycerol kinase
BBT72VS00	CmoCh03G008470	3.5445	Ras-related protein
BBT72VS00	CmoCh10G010070	3.54591	Receptor-like serine/threonine-protein kinase
BBT72VS00	CmoCh07G007400	3.54706	salicylic acid-binding protein 2-like
BBT12VS00	CmoCh16G003410	3.54743	Unknown protein
BBT120VS00	CmoCh07G005790	3.54762	Basic helix-loop-helix DNA-binding superfamily protein, putative isoform 1
BBT24VS00	CmoCh09G001930	3.55044	Pyridoxal phosphate (PLP)-dependent transferases superfamily protein
BBT120VS00	CmoCh15G001690	3.55076	Peroxidase
BBT72VS00	CmoCh01G003190	3.55315	Indole-3-acetic acid-induced protein ARG2
BBT72VS00	CmoCh01G003210	3.55356	UDP-glucuronate decarboxylase
BBT72VS00	CmoCh02G015040	3.55438	protein LURP-one-related 4-like
BBT72VS00	CmoCh09G003720	3.55538	Protein kinase domain-containing protein
BBT120VS00	CmoCh10G012240	3.55628	calmodulin-binding protein 60 A-like
BBT72VS00	CmoCh11G011760	3.55667	Respiratory burst oxidase
BBT120VS00	CmoCh02G012520	3.56131	Peroxidase
BBT24VS00	CmoCh08G005430	3.56137	Beta-glucosidase
BBT72VS00	CmoCh16G013320	3.56182	Unknown protein
BBT72VS00	CmoCh06G006400	3.56182	Calmodulin-like protein 17
BBT120VS00	CmoCh01G009100	3.5655	Endoglucanase
BBT72VS00	CmoCh08G006440	3.56578	thionin-like protein 2
BBT120VS00	CmoCh19G001010	3.56583	transcription factor MYB4-like
BBT12VS00	CmoCh14G016850	3.56637	CASP-like protein
BBT120VS00	CmoCh16G002150	3.56706	Unknown protein
BBT72VS00	CmoCh04G003610	3.56929	Receptor protein kinase, putative
BBT72VS00	CmoCh14G017800	3.57062	VAN3-binding protein-like isoform X1
BBT72VS00	CmoCh19G002800	3.57099	Annexin
BBT120VS00	CmoCh18G005030	3.57169	berberine bridge enzyme-like 18
BBT72VS00	CmoCh18G000700	3.57234	Arf-GAP domain-containing protein
BBT72VS00	CmoCh07G008500	3.57251	syntaxin-121-like
BBT72VS00	CmoCh14G002420	3.57253	pistil-specific extensin-like protein
BBT72VS00	CmoCh07G007210	3.57273	Protein of unknown function (DUF1685)
BBT72VS00	CmoCh14G021330	3.57585	acidic endochitinase-like
BBT72VS00	CmoCh09G001800	3.57819	cytochrome P450 CYP82D47-like
BBT72VS00	CmoCh01G004510	3.57886	UDP-arabinopyranose mutase
BBT72VS00	CmoCh04G000650	3.57998	Unknown protein
BBT72VS00	CmoCh05G011100	3.58246	F-box protein PP2-B15-like
BBT72VS00	CmoCh16G004780	3.58505	epidermis-specific secreted glycoprotein EP1-like
BBT120VS00	CmoCh17G013690	3.5872	auxin-responsive protein SAUR36-like
BBT72VS00	CmoCh14G015050	3.58812	Aldo_ket_red domain-containing protein
BBT72VS00	CmoCh17G002270	3.59232	Amine oxidase
BBT72VS00	CmoCh03G006130	3.59422	microtubule-associated protein 70-5
BBT72VS00	CmoCh16G004370	3.59646	50S ribosomal protein L33-like
BBT120VS00	CmoCh02G016140	3.59963	expansin-like B1
BBT72VS00	CmoCh14G014650	3.60323	Membrane-associated 30 kDa protein
BBT72VS00	CmoCh18G011510	3.60718	Unknown protein
BBT120VS00	CmoCh02G008660	3.60754	dof zinc finger protein DOF3.2-like
BBT72VS00	CmoCh02G014290	3.61039	P-loop NTPase domain-containing protein LPA1 homolog 1-like
BBT72VS00	CmoCh09G007000	3.61425	VQ motif-containing protein 22-like
BBT72VS00	CmoCh01G013170	3.61572	Non-specific serine/threonine protein kinase
BBT72VS00	CmoCh17G007590	3.61577	protein PLANT CADMIUM RESISTANCE 8
BBT72VS00	CmoCh15G011870	3.61799	L-lactate dehydrogenase
BBT120VS00	CmoCh08G008880	3.61849	Protein MNN4-like
BBT72VS00	CmoCh17G004310	3.62523	heavy metal-associated isoprenylated plant protein 39-like
BBT72VS00	CmoCh10G010210	3.62526	L-ascorbate oxidase
BBT120VS00	CmoCh04G017480	3.62733	Expansin
BBT72VS00	CmoCh03G009380	3.62778	Growth-regulating factor
BBT72VS00	CmoCh03G005530	3.63119	Patatin
BBT72VS00	CmoCh15G010610	3.63144	Unknown protein
BBT120VS00	CmoCh03G009640	3.63786	Peroxidase
BBT120VS00	CmoCh17G013460	3.64048	ethylene-responsive transcription factor ERF113-like
BBT120VS00	CmoCh07G002350	3.6406	non-classical arabinogalactan protein 31-like
BBT72VS00	CmoCh05G010550	3.64424	Unknown protein
BBT72VS00	CmoCh03G003110	3.64652	RING-type E3 ubiquitin transferase
BBT72VS00	CmoCh01G000850	3.65047	Leucine-rich repeat protein kinase family protein
BBT120VS00	CmoCh14G017780	3.65731	leucine-rich repeat extensin-like protein 6
BBT72VS00	CmoCh05G007120	3.65792	(R)-mandelonitrile lyase 1-like
BBT120VS00	CmoCh04G020270	3.65876	NADPH-dependent pterin aldehyde reductase-like
BBT72VS00	CmoCh19G002710	3.66035	metacaspase-1-like
BBT72VS00	CmoCh11G014340	3.66182	Pathogenesis-related protein 1
BBT120VS00	CmoCh02G001400	3.66199	coumaroyl-CoA:anthocyanidin 3-O-glucoside-6''-O-coumaroyltransferase 1-like
BBT72VS00	CmoCh15G005850	3.66262	Unknown protein
BBT72VS00	CmoCh04G007550	3.67	6-phosphogluconate dehydrogenase, decarboxylating
BBT12VS00	CmoCh18G004080	3.672	WRKY protein
BBT72VS00	CmoCh03G000560	3.6752	Heat Stress Transcription Factor family protein
BBT120VS00	CmoCh19G011460	3.67634	X8 domain-containing protein
BBT72VS00	CmoCh12G005440	3.67878	FKBP-type peptidyl-prolyl cis-trans isomerase family protein
BBT120VS00	CmoCh20G000490	3.67898	Peroxidase
BBT72VS00	CmoCh11G004480	3.6819	Cellulose synthase
BBT12VS00	CmoCh03G012390	3.68217	aquaporin PIP2-2-like
BBT120VS00	CmoCh16G000740	3.68255	WRKY domain-containing protein
BBT72VS00	CmoCh04G010840	3.68448	Myb/SANT-like DNA-binding domain protein
BBT72VS00	CmoCh06G016570	3.685	Glutathione peroxidase
BBT120VS00	CmoCh10G008490	3.6865	(1->3)-beta-glucan endohydrolase
BBT120VS00	CmoCh19G004150	3.68745	heavy metal-associated isoprenylated plant protein 31
BBT120VS00	CmoCh03G008830	3.68758	ATP binding protein
BBT72VS00	CmoCh08G008060	3.68759	RING-type E3 ubiquitin transferase
BBT72VS00	CmoCh08G004780	3.68868	gibberellin 2-beta-dioxygenase 2-like
BBT72VS00	CmoCh16G012780	3.68936	transcription factor MYC2-like
BBT72VS00	CmoCh02G011760	3.68975	CDPK-related kinase 6-like
BBT72VS00	CmoCh14G013440	3.68988	mitochondrial arginine transporter BAC2-like
BBT24VS00	CmoCh08G012220	3.70247	major allergen Pru ar 1-like
BBT72VS00	CmoCh03G004190	3.70481	Cysteine/Histidine-rich C1 domain family protein
BBT72VS00	CmoCh16G001000	3.70581	delta(1)-pyrroline-2-carboxylate reductase
BBT72VS00	CmoCh15G006800	3.70679	Unknown protein
BBT72VS00	CmoCh13G002950	3.71003	Plant protein of unknown function (DUF868)
BBT72VS00	CmoCh16G009750	3.71037	pirin-like protein
BBT120VS00	CmoCh19G009610	3.71375	cysteine-rich repeat secretory protein 38-like
BBT72VS00	CmoCh04G031310	3.71538	Protein of unknown function (DUF803)
BBT72VS00	CmoCh02G018080	3.7161	cytochrome P450 94A2-like
BBT72VS00	CmoCh14G007400	3.71745	WRKY protein
BBT72VS00	CmoCh02G008660	3.71975	dof zinc finger protein DOF3.2-like
BBT120VS00	CmoCh04G004920	3.72119	calponin homology domain-containing protein DDB_G0272472
BBT72VS00	CmoCh04G013150	3.7232	LOB domain-containing protein
BBT72VS00	CmoCh13G007770	3.72348	Unknown protein
BBT72VS00	CmoCh04G020340	3.72953	calmodulin-2/4-like
BBT120VS00	CmoCh14G014520	3.7301	Protein tweety-2 like
BBT120VS00	CmoCh01G011480	3.73126	AAI domain-containing protein
BBT72VS00	CmoCh05G007500	3.73239	ENTH domain-containing protein
BBT72VS00	CmoCh07G010150	3.73661	zinc finger protein ZAT11-like
BBT72VS00	CmoCh08G012220	3.7379	major allergen Pru ar 1-like
BBT72VS00	CmoCh04G024250	3.73845	Myotubularin-like protein
BBT72VS00	CmoCh11G007690	3.73907	Unknown protein
BBT120VS00	CmoCh06G008240	3.74033	GUB_WAK_bind domain-containing protein
BBT12VS00	CmoCh05G006180	3.74101	carotenoid cleavage dioxygenase 8 homolog B, chloroplastic-like
BBT12VS00	CmoCh02G012510	3.74172	Peroxidase
BBT72VS00	CmoCh06G013740	3.74644	Sulfate adenylyltransferase
BBT72VS00	CmoCh06G016170	3.74688	transcription factor bHLH128-like
BBT120VS00	CmoCh05G006980	3.74707	RING-H2 finger protein ATL56-like
BBT72VS00	CmoCh01G013480	3.74827	anthocyanidin 3-O-glucosyltransferase 2-like
BBT72VS00	CmoCh20G000900	3.75134	chaperonin-like RbcX protein 2, chloroplastic
BBT72VS00	CmoCh04G031130	3.7563	Glutamine amidotransferase type-1 domain-containing protein
BBT72VS00	CmoCh03G011180	3.75726	COPII coat assembly protein SEC16, putative
BBT72VS00	CmoCh19G002850	3.75877	Peroxidase
BBT72VS00	CmoCh04G014470	3.76221	synaptotagmin-3-like
BBT24VS00	CmoCh05G006180	3.76245	carotenoid cleavage dioxygenase 8 homolog B, chloroplastic-like
BBT120VS00	CmoCh16G004910	3.76267	VQ motif-containing protein 1-like
BBT12VS00	CmoCh00G001460	3.76299	Transmembrane protein, putative
BBT120VS00	CmoCh02G001100	3.76362	ethylene-responsive transcription factor ERF054-like
BBT72VS00	CmoCh05G011110	3.7652	F-box protein PP2-B15-like
BBT120VS00	CmoCh10G009020	3.76631	RING-type E3 ubiquitin transferase
BBT72VS00	CmoCh20G004330	3.77313	Expansin
BBT72VS00	CmoCh00G001510	3.77333	Peroxidase
BBT120VS00	CmoCh01G013470	3.77464	Glycosyltransferase
BBT72VS00	CmoCh04G005460	3.77497	WRKY protein
BBT120VS00	CmoCh15G006080	3.77539	serine decarboxylase-like
BBT72VS00	CmoCh09G000830	3.7772	Unknown protein
BBT120VS00	CmoCh09G011430	3.77723	NAC domain-containing protein
BBT72VS00	CmoCh03G005420	3.77916	cysteine-rich receptor-like protein kinase 26
BBT24VS00	CmoCh13G002430	3.78283	Xyloglucan endotransglucosylase/hydrolase
BBT72VS00	CmoCh15G003930	3.78818	Protein of unknown function, DUF547
BBT12VS00	CmoCh14G013160	3.78914	Leucine-rich repeat protein kinase family protein
BBT120VS00	CmoCh17G002330	3.79238	sugar transport protein 13-like
BBT120VS00	CmoCh03G010450	3.79655	WRKY DNA-binding protein 51, putative
BBT72VS00	CmoCh02G017930	3.79702	Inorganic phosphate transporter 1-1
BBT72VS00	CmoCh20G000290	3.79906	IQ domain-containing protein IQM2-like
BBT120VS00	CmoCh09G006420	3.80034	ABSCISIC ACID-INSENSITIVE 5-like protein 2
BBT72VS00	CmoCh15G006400	3.80177	thioredoxin M5, chloroplastic-like
BBT72VS00	CmoCh16G000180	3.81354	2-oxoglutarate (2OG) and Fe(II)-dependent oxygenase superfamily protein
BBT72VS00	CmoCh16G004110	3.81391	Protein kinase domain-containing protein
BBT72VS00	CmoCh15G009620	3.81411	Core-2/I-branching beta-1,6-N-acetylglucosaminyltransferase family protein
BBT120VS00	CmoCh11G018630	3.81562	Unknown protein
BBT120VS00	CmoCh09G000510	3.81827	12-oxophytodienoate reductase 1
BBT72VS00	CmoCh16G008170	3.81838	Methionine S-methyltransferase
BBT72VS00	CmoCh03G011660	3.81978	zf-RVT domain-containing protein
BBT72VS00	CmoCh04G000790	3.82098	RING-type E3 ubiquitin transferase
BBT72VS00	CmoCh13G005480	3.8305	endochitinase EP3
BBT72VS00	CmoCh11G011140	3.83207	Purple acid phosphatase
BBT72VS00	CmoCh11G004800	3.83222	acidic mammalian chitinase-like
BBT72VS00	CmoCh03G006460	3.83612	Unknown protein
BBT72VS00	CmoCh14G016420	3.83669	ethylene-responsive transcription factor ERF071-like
BBT72VS00	CmoCh20G003450	3.83791	Peroxidase
BBT72VS00	CmoCh15G004060	3.84053	CASP-like protein
BBT72VS00	CmoCh14G020280	3.84086	Pectinesterase
BBT72VS00	CmoCh17G008950	3.84088	Clp R domain-containing protein
BBT72VS00	CmoCh03G001720	3.84148	Pyrroline-5-carboxylate reductase
BBT120VS00	CmoCh01G013730	3.84276	NAC domain-containing protein
BBT72VS00	CmoCh12G013370	3.84374	Cytokinin dehydrogenase
BBT72VS00	CmoCh03G007030	3.84401	thiosulfate sulfurtransferase 18-like
BBT72VS00	CmoCh15G000180	3.84494	PPM-type phosphatase domain-containing protein
BBT72VS00	CmoCh14G006450	3.84764	alpha-dioxygenase 1
BBT12VS00	CmoCh17G000580	3.85236	RING-type E3 ubiquitin transferase
BBT120VS00	CmoCh01G020650	3.86235	DEP domain-containing mTOR-interacting protein
BBT72VS00	CmoCh17G011030	3.86893	Transmembrane protein
BBT12VS00	CmoCh02G017850	3.87913	protein LIGHT-DEPENDENT SHORT HYPOCOTYLS 3-like
BBT120VS00	CmoCh03G001830	3.88148	Unknown protein
BBT120VS00	CmoCh16G001310	3.8832	Actin depolymerizing factor, putative
BBT72VS00	CmoCh07G004220	3.88408	Chaperone protein dnaJ 11
BBT72VS00	CmoCh16G004790	3.89229	epidermis-specific secreted glycoprotein EP1-like
BBT72VS00	CmoCh04G030180	3.8938	RING-type E3 ubiquitin transferase
BBT120VS00	CmoCh09G000250	3.89829	AT-hook motif nuclear-localized protein
BBT72VS00	CmoCh03G005020	3.89871	internal alternative NAD(P)H-ubiquinone oxidoreductase A1, mitochondrial-like
BBT72VS00	CmoCh15G011760	3.90394	metalloendoproteinase 1-MMP
BBT72VS00	CmoCh07G010350	3.90513	WD repeat-containing protein 44
BBT72VS00	CmoCh13G005410	3.90761	Remorin_C domain-containing protein
BBT72VS00	CmoCh11G000530	3.9088	phosphopantothenoylcysteine decarboxylase-like
BBT72VS00	CmoCh14G014970	3.90907	NAD(P)-linked oxidoreductase superfamily protein
BBT72VS00	CmoCh19G001550	3.90956	Pectate lyase
BBT72VS00	CmoCh20G008860	3.91005	extra-large guanine nucleotide-binding protein 1-like
BBT72VS00	CmoCh14G003430	3.91088	Cytokinin riboside 5'-monophosphate phosphoribohydrolase
BBT72VS00	CmoCh19G003930	3.91308	Protein kinase domain-containing protein
BBT120VS00	CmoCh20G009420	3.91399	pleiotropic drug resistance protein 1-like
BBT72VS00	CmoCh07G006210	3.91606	Agamous-like MADS-box protein AGL61-like isoform X1
BBT72VS00	CmoCh04G026870	3.91799	ABC transporter G family member 24-like
BBT120VS00	CmoCh04G013150	3.91868	LOB domain-containing protein
BBT120VS00	CmoCh11G000530	3.91891	phosphopantothenoylcysteine decarboxylase-like
BBT72VS00	CmoCh02G012890	3.92082	chaperonin-like RbcX protein 2, chloroplastic
BBT120VS00	CmoCh05G004350	3.92739	WRKY domain-containing protein
BBT120VS00	CmoCh04G026710	3.92754	DUF4050 domain-containing protein
BBT120VS00	CmoCh11G004900	3.92755	Unknown protein
BBT120VS00	CmoCh19G010770	3.92867	Phosphotyrosine protein phosphatases superfamily protein
BBT72VS00	CmoCh03G013560	3.92919	2-oxoglutarate (2OG) and Fe(II)-dependent oxygenase superfamily protein
BBT120VS00	CmoCh02G007690	3.93256	calmodulin-binding receptor-like cytoplasmic kinase 1
BBT72VS00	CmoCh05G007750	3.93352	protein BONZAI 3
BBT72VS00	CmoCh06G002100	3.93778	Pyruvate decarboxylase
BBT72VS00	CmoCh09G009010	3.93921	Receptor-like serine/threonine-protein kinase
BBT72VS00	CmoCh11G014770	3.94567	RING-type E3 ubiquitin transferase
BBT72VS00	CmoCh08G003480	3.94573	Exostosin domain-containing protein
BBT12VS00	CmoCh14G000170	3.94748	Transcription repressor
BBT72VS00	CmoCh16G013330	3.94959	Dirigent protein
BBT72VS00	CmoCh03G013070	3.95586	E3 ubiquitin-protein ligase ATL41-like
BBT72VS00	CmoCh05G002030	3.95957	Patatin
BBT72VS00	CmoCh17G000320	3.95997	LOB domain-containing protein
BBT12VS00	CmoCh13G002430	3.96056	Xyloglucan endotransglucosylase/hydrolase
BBT72VS00	CmoCh10G007420	3.96135	Beta-galactosidase
BBT24VS00	CmoCh13G006750	3.96224	lactosylceramide 4-alpha-galactosyltransferase-like
BBT24VS00	CmoCh09G007220	3.96539	HTH myb-type domain-containing protein
BBT120VS00	CmoCh02G001710	3.96557	Glutamate receptor
BBT72VS00	CmoCh13G006760	3.96665	polyphenol oxidase, chloroplastic-like
BBT72VS00	CmoCh05G010560	3.96794	Germin-like protein
BBT120VS00	CmoCh16G009750	3.968	pirin-like protein
BBT120VS00	CmoCh04G025540	3.97128	extensin-like
BBT72VS00	CmoCh07G012580	3.97159	receptor-like protein kinase FERONIA
BBT72VS00	CmoCh10G003390	3.97188	Protein DETOXIFICATION
BBT72VS00	CmoCh10G012220	3.97313	calmodulin-binding protein 60 G-like isoform X1
BBT120VS00	CmoCh04G014470	3.9754	synaptotagmin-3-like
BBT72VS00	CmoCh05G011170	3.97986	acetylajmalan esterase-like
BBT72VS00	CmoCh03G011650	3.98133	pleiotropic drug resistance protein 2-like
BBT72VS00	CmoCh17G004480	3.98137	Glycosyltransferase
BBT72VS00	CmoCh02G011190	3.98275	acidic endochitinase-like
BBT72VS00	CmoCh18G013570	3.98866	myosin-2
BBT72VS00	CmoCh20G000130	3.98955	Late embryogenesis abundant (LEA) hydroxyproline-rich glycoprotein family
BBT120VS00	CmoCh07G006570	3.99321	Calcium-transporting ATPase
BBT120VS00	CmoCh04G002510	3.9949	Exocyst subunit Exo70 family protein
BBT72VS00	CmoCh14G017620	3.99498	Non-specific lipid-transfer protein-like protein
BBT72VS00	CmoCh08G002240	3.99842	cell division control protein 45 homolog
BBT72VS00	CmoCh15G014610	3.99855	pfkB-like carbohydrate kinase family protein
BBT72VS00	CmoCh14G009490	3.99986	neuronal acetylcholine receptor subunit alpha-2-like
BBT120VS00	CmoCh17G008950	4.00257	Clp R domain-containing protein
BBT72VS00	CmoCh05G007130	4.00338	(R)-mandelonitrile lyase 1-like
BBT120VS00	CmoCh14G016850	4.00664	CASP-like protein
BBT120VS00	CmoCh14G016420	4.00746	ethylene-responsive transcription factor ERF071-like
BBT120VS00	CmoCh09G011000	4.00869	pathogen-related protein-like
BBT72VS00	CmoCh10G005740	4.01052	mitogen-activated protein kinase kinase kinase 17-like
BBT72VS00	CmoCh11G005700	4.01139	MAPK kinase substrate protein At1g80180-like
BBT12VS00	CmoCh02G014330	4.01317	Unknown protein
BBT120VS00	CmoCh07G005480	4.01488	Rab family
BBT72VS00	CmoCh04G015630	4.02034	Unknown protein
BBT72VS00	CmoCh04G005850	4.02165	Unknown protein
BBT72VS00	CmoCh10G009340	4.02282	Tetratricopeptide repeat (TPR)-like superfamily protein isoform 1
BBT72VS00	CmoCh09G010550	4.02388	Calcium-binding EF-hand family protein
BBT72VS00	CmoCh14G016090	4.02457	transcription factor MYB78-like
BBT72VS00	CmoCh09G009820	4.02542	pirin-like protein
BBT120VS00	CmoCh09G001800	4.03278	cytochrome P450 CYP82D47-like
BBT72VS00	CmoCh19G005050	4.0332	L-type lectin-domain containing receptor kinase IX.1-like
BBT72VS00	CmoCh14G001360	4.03373	RHOMBOID-like protein
BBT72VS00	CmoCh03G010440	4.03817	serine/threonine-protein kinase PBS1-like
BBT120VS00	CmoCh08G008390	4.04221	Glycosyltransferase
BBT72VS00	CmoCh06G010480	4.0427	Glycosyltransferase
BBT120VS00	CmoCh13G006760	4.04338	polyphenol oxidase, chloroplastic-like
BBT72VS00	CmoCh07G007410	4.04571	Unknown protein
BBT12VS00	CmoCh04G006730	4.04719	Phytoene synthase
BBT72VS00	CmoCh11G020520	4.04835	cysteine-rich and transmembrane domain-containing protein A-like
BBT72VS00	CmoCh11G011730	4.05084	protein SRC2 homolog
BBT72VS00	CmoCh04G009900	4.05188	calmodulin-like
BBT72VS00	CmoCh20G005310	4.05464	Zinc finger (C3HC4-type RING finger) family protein
BBT120VS00	CmoCh03G013560	4.05568	2-oxoglutarate (2OG) and Fe(II)-dependent oxygenase superfamily protein
BBT72VS00	CmoCh14G010330	4.05841	ras-related protein RGP1-like
BBT72VS00	CmoCh02G000640	4.05954	1-aminocyclopropane-1-carboxylate oxidase 1-like
BBT120VS00	CmoCh15G007040	4.06084	MYB transcription factor
BBT120VS00	CmoCh10G007540	4.06406	Unknown protein
BBT120VS00	CmoCh14G018730	4.06448	protein NRT1/ PTR FAMILY 5.2-like
BBT120VS00	CmoCh02G014510	4.07503	Mannan endo-1,4-beta-mannosidase
BBT72VS00	CmoCh20G008550	4.07524	isoflavone reductase-like protein
BBT72VS00	CmoCh12G006790	4.0765	phosphate transporter PHO1 homolog 3-like
BBT72VS00	CmoCh12G000640	4.07714	Heat shock protein DnaJ, cysteine-rich domain containing protein
BBT72VS00	CmoCh20G000440	4.07752	Dirigent protein
BBT120VS00	CmoCh04G025200	4.07828	wall-associated receptor kinase 2-like
BBT72VS00	CmoCh10G002320	4.0797	t-SNARE coiled-coil homology domain-containing protein
BBT12VS00	CmoCh04G011960	4.08053	plasma membrane intrinsic protein 1;4
BBT120VS00	CmoCh06G013700	4.08591	Calmodulin
BBT72VS00	CmoCh07G001150	4.08845	cytochrome P450 710A11-like
BBT72VS00	CmoCh19G005560	4.08904	Magnesium transporter
BBT72VS00	CmoCh02G014990	4.09133	oxalate--CoA ligase-like
BBT72VS00	CmoCh11G003010	4.09439	Protein DETOXIFICATION
BBT120VS00	CmoCh01G011110	4.09525	cellulose synthase-like protein E1
BBT72VS00	CmoCh18G011500	4.09723	phosphate transporter PHO1 homolog 3-like
BBT12VS00	CmoCh07G008470	4.09956	alpha/beta-Hydrolases superfamily protein
BBT120VS00	CmoCh04G011070	4.10208	RING-type E3 ubiquitin transferase
BBT120VS00	CmoCh06G007800	4.10244	auxin-responsive protein SAUR36-like
BBT72VS00	CmoCh01G004070	4.10308	Regulator of Vps4 activity in the MVB pathway protein, putative
BBT72VS00	CmoCh14G018460	4.10317	ethylene-responsive transcription factor 1B
BBT120VS00	CmoCh08G007230	4.1035	60S ribosomal protein L28-2 isoform B
BBT120VS00	CmoCh14G014960	4.10977	Protein of unknown function (DUF 3339)
BBT120VS00	CmoCh14G018200	4.1117	Proteinase inhibitor
BBT72VS00	CmoCh02G015000	4.11465	Unknown protein
BBT72VS00	CmoCh18G008780	4.11606	Annexin
BBT72VS00	CmoCh04G009610	4.11936	PB1 domain-containing protein
BBT120VS00	CmoCh08G009240	4.12328	Protein of unknown function (DUF1442)
BBT72VS00	CmoCh04G004660	4.12339	Phytosulfokine-beta
BBT72VS00	CmoCh05G007020	4.12893	Xyloglucan endotransglucosylase/hydrolase
BBT120VS00	CmoCh12G003370	4.13018	ornithine decarboxylase-like
BBT72VS00	CmoCh02G004190	4.13182	Non-symbiotic hemoglobin, putative
BBT72VS00	CmoCh02G006920	4.13315	trans-cinnamate 4-monooxygenase
BBT120VS00	CmoCh04G020370	4.1346	calmodulin-like
BBT72VS00	CmoCh17G004180	4.1355	Cysteine synthase
BBT72VS00	CmoCh08G011960	4.13622	flowering-promoting factor 1-like protein 1
BBT72VS00	CmoCh06G000880	4.13992	11 kDa late embryogenesis abundant protein-like
BBT72VS00	CmoCh20G009130	4.1403	Inositol-tetrakisphosphate 1-kinase
BBT120VS00	CmoCh03G013740	4.14049	WRKY protein
BBT12VS00	CmoCh11G015630	4.14151	nudix hydrolase 13, mitochondrial-like
BBT12VS00	CmoCh11G013610	4.14482	abscisic acid 8'-hydroxylase 4-like
BBT72VS00	CmoCh06G011670	4.14734	3-phosphoshikimate 1-carboxyvinyltransferase
BBT72VS00	CmoCh01G020440	4.14799	Alcohol dehydrogenase, putative
BBT72VS00	CmoCh03G004160	4.15449	Unknown protein
BBT72VS00	CmoCh20G003420	4.15577	Peroxidase
BBT72VS00	CmoCh06G001750	4.16232	WRKY protein
BBT120VS00	CmoCh12G007990	4.16343	Plant protein of unknown function (DUF868)
BBT120VS00	CmoCh18G004990	4.16536	Berberine bridge enzyme-like
BBT120VS00	CmoCh02G012510	4.16655	Peroxidase
BBT120VS00	CmoCh14G007400	4.16905	WRKY protein
BBT12VS00	CmoCh02G015790	4.1698	tonoplast intrinsic protein 2;2
BBT72VS00	CmoCh01G015120	4.17192	Phosphoenolpyruvate carboxykinase (ATP)
BBT12VS00	CmoCh10G006700	4.1733	bark storage protein A
BBT72VS00	CmoCh04G005800	4.17568	protein BRASSINOSTEROID INSENSITIVE 1-like
BBT120VS00	CmoCh09G003180	4.18119	transcription factor MYB36-like
BBT120VS00	CmoCh01G013920	4.1831	VQ motif-containing protein 22-like
BBT72VS00	CmoCh14G001510	4.18801	ADP-ribosylation factor GTPase-activating protein AGD7-like
BBT72VS00	CmoCh17G007880	4.19109	thionin-like protein 2
BBT72VS00	CmoCh05G007960	4.19146	ABC transporter B family member 4-like
BBT120VS00	CmoCh11G015630	4.19232	nudix hydrolase 13, mitochondrial-like
BBT72VS00	CmoCh15G008120	4.1924	Calcium-transporting ATPase
BBT72VS00	CmoCh11G007460	4.1925	serine/threonine-protein kinase RIPK-like
BBT72VS00	CmoCh02G001520	4.19672	blue copper protein-like
BBT72VS00	CmoCh08G005940	4.19741	Plant protein of unknown function (DUF247)
BBT120VS00	CmoCh14G009730	4.1995	Pectin lyase-like superfamily protein
BBT12VS00	CmoCh03G007280	4.20003	Zinc finger, B-box
BBT120VS00	CmoCh19G000650	4.20463	inhibitor of trypsin and hageman factor-like
BBT72VS00	CmoCh19G011460	4.20855	X8 domain-containing protein
BBT72VS00	CmoCh15G011570	4.20931	ethylene-responsive transcription factor 2-like
BBT72VS00	CmoCh17G001670	4.2133	WAT1-related protein
BBT72VS00	CmoCh01G003650	4.21454	RING-type E3 ubiquitin transferase
BBT72VS00	CmoCh13G010540	4.2158	LEAF RUST 10 DISEASE-RESISTANCE LOCUS RECEPTOR-LIKE PROTEIN KINASE-like 1.2
BBT120VS00	CmoCh08G005650	4.21986	4-coumarate--CoA ligase
BBT72VS00	CmoCh11G018900	4.22035	mitogen-activated protein kinase kinase kinase 18-like
BBT72VS00	CmoCh04G027180	4.22403	Unknown protein
BBT72VS00	CmoCh19G007410	4.22754	myb-related protein 308-like
BBT72VS00	CmoCh17G003340	4.22757	Protein phosphatase 2C family protein
BBT72VS00	CmoCh06G016690	4.22849	Glycerophosphodiester phosphodiesterase
BBT120VS00	CmoCh03G011860	4.2287	Threonine dehydratase
BBT72VS00	CmoCh10G008440	4.23035	wall-associated receptor kinase-like 2
BBT72VS00	CmoCh18G013380	4.23649	Spermidine synthase
BBT72VS00	CmoCh02G015440	4.23792	Protein of unknown function (DUF1442)
BBT72VS00	CmoCh14G007170	4.24117	lysine histidine transporter 1-like
BBT72VS00	CmoCh15G006570	4.24616	Calcium-binding EF-hand family protein
BBT72VS00	CmoCh10G005840	4.24685	EIN3-binding F-box protein 1-like
BBT72VS00	CmoCh05G008070	4.24986	Disease resistance protein
BBT72VS00	CmoCh14G013610	4.25205	boron transporter 4-like
BBT72VS00	CmoCh07G001040	4.25247	VQ motif-containing protein 10-like
BBT72VS00	CmoCh14G020320	4.25282	3-phosphoshikimate 1-carboxyvinyltransferase
BBT120VS00	CmoCh02G004190	4.26149	Non-symbiotic hemoglobin, putative
BBT72VS00	CmoCh16G003360	4.26275	trypsin inhibitor 1-like
BBT72VS00	CmoCh13G001100	4.26718	Lipoxygenase
BBT72VS00	CmoCh15G008990	4.26869	phytosulfokine receptor 1-like
BBT72VS00	CmoCh17G009160	4.26923	cytochrome P450 705A22-like
BBT72VS00	CmoCh09G001860	4.27267	cytochrome P450 CYP82D47-like
BBT72VS00	CmoCh03G003950	4.27316	glutathione S-transferase U8-like
BBT120VS00	CmoCh20G000450	4.27511	Dirigent protein
BBT12VS00	CmoCh03G005870	4.27636	RING/U-box superfamily protein
BBT72VS00	CmoCh13G009310	4.27721	RING-type E3 ubiquitin transferase
BBT12VS00	CmoCh09G007220	4.27932	HTH myb-type domain-containing protein
BBT72VS00	CmoCh07G011420	4.28465	NAD(P)-binding Rossmann-fold superfamily protein
BBT72VS00	CmoCh03G012560	4.28517	Heat stress transcription factor B-2a-like
BBT72VS00	CmoCh12G006010	4.28847	Glutamate receptor
BBT24VS00	CmoCh15G008260	4.29016	Protein arginine N-methyltransferase
BBT72VS00	CmoCh18G009730	4.29074	ethylene-responsive transcription factor WRI1-like
BBT72VS00	CmoCh09G000490	4.292	WUSCHEL-related homeobox 8-like
BBT120VS00	CmoCh17G008580	4.29283	ethylene-responsive transcription factor ERF003-like
BBT120VS00	CmoCh02G000180	4.29646	transcription factor JUNGBRUNNEN 1-like
BBT24VS00	CmoCh02G016420	4.30153	beta-amyrin 11-oxidase-like
BBT120VS00	CmoCh07G004270	4.303	WEB family protein At3g51220-like
BBT72VS00	CmoCh06G004020	4.30469	thaumatin-like protein 1b
BBT120VS00	CmoCh06G017120	4.30557	EG45-like domain containing protein
BBT72VS00	CmoCh13G011060	4.30647	UDP-arabinopyranose mutase
BBT120VS00	CmoCh02G016080	4.30777	ethylene-responsive transcription factor 1A-like
BBT72VS00	CmoCh04G017480	4.31183	Expansin
BBT72VS00	CmoCh14G020770	4.31189	BON1-associated protein 2-like
BBT120VS00	CmoCh04G003580	4.31649	Unknown protein
BBT72VS00	CmoCh10G007530	4.31781	BHLH domain-containing protein
BBT72VS00	CmoCh02G017380	4.32166	3-ketoacyl-CoA thiolase 2, peroxisomal-like
BBT120VS00	CmoCh07G013740	4.32176	EGF domain-specific O-linked N-acetylglucosamine transferase-like
BBT120VS00	CmoCh20G003310	4.3253	trans-cinnamate 4-monooxygenase-like
BBT120VS00	CmoCh15G008990	4.33439	phytosulfokine receptor 1-like
BBT120VS00	CmoCh14G013170	4.33488	Leucine-rich repeat protein kinase family protein
BBT12VS00	CmoCh08G001640	4.34039	protein LHY-like isoform X1
BBT72VS00	CmoCh14G001630	4.34056	Exocyst subunit Exo70 family protein
BBT120VS00	CmoCh12G001970	4.34684	PH, RCC1 and FYVE domains-containing protein 1-like
BBT12VS00	CmoCh04G011950	4.34811	plasma membrane intrinsic protein 1;4
BBT120VS00	CmoCh17G010130	4.35177	Multidrug resistance protein ABC transporter family protein, putative
BBT72VS00	CmoCh18G006190	4.35465	C2 and GRAM domain-containing protein
BBT72VS00	CmoCh11G006140	4.35641	Unknown protein
BBT72VS00	CmoCh19G010770	4.35798	Phosphotyrosine protein phosphatases superfamily protein
BBT12VS00	CmoCh04G011940	4.36277	plasma membrane intrinsic protein 1;4
BBT72VS00	CmoCh02G015010	4.36461	Amp-dependent synthetase and ligase
BBT72VS00	CmoCh17G007070	4.36675	inorganic pyrophosphatase 2
BBT72VS00	CmoCh17G007180	4.36833	Leucine-rich repeat protein kinase family protein
BBT72VS00	CmoCh11G001540	4.37234	ABC transporter A family member 7-like
BBT72VS00	CmoCh15G014620	4.37271	MADS-box protein AGL42-like
BBT120VS00	CmoCh07G007390	4.37474	Unknown protein
BBT72VS00	CmoCh15G004210	4.37534	Unknown protein
BBT72VS00	CmoCh05G005410	4.37561	Unknown protein
BBT72VS00	CmoCh19G005900	4.38111	22.0 kDa heat shock protein-like
BBT120VS00	CmoCh12G013420	4.38405	Acco20
BBT72VS00	CmoCh14G020220	4.38754	Glutathione S-transferase
BBT72VS00	CmoCh02G000180	4.38818	transcription factor JUNGBRUNNEN 1-like
BBT72VS00	CmoCh06G000470	4.39025	NADH:cytochrome B5 reductase 1
BBT24VS00	CmoCh17G010130	4.39279	Multidrug resistance protein ABC transporter family protein, putative
BBT120VS00	CmoCh02G016600	4.39384	Unknown protein
BBT72VS00	CmoCh06G016310	4.39546	extensin-2-like
BBT120VS00	CmoCh03G011060	4.39765	RING-H2 finger protein ATL70-like
BBT72VS00	CmoCh03G005670	4.39823	Rhamnogalacturonan endolyase
BBT120VS00	CmoCh15G014680	4.39873	receptor-like protein 12 isoform X1
BBT120VS00	CmoCh11G002090	4.39909	respiratory burst oxidase homolog protein A-like
BBT72VS00	CmoCh01G013730	4.40094	NAC domain-containing protein
BBT72VS00	CmoCh11G003930	4.40173	Hexosyltransferase
BBT72VS00	CmoCh09G000250	4.4021	AT-hook motif nuclear-localized protein
BBT72VS00	CmoCh11G020060	4.40608	RING-H2 finger protein ATL40-like
BBT120VS00	CmoCh04G027620	4.40651	CASP-like protein
BBT120VS00	CmoCh08G010590	4.40664	MYB transcription factor
BBT72VS00	CmoCh08G008380	4.40916	Glycosyltransferase
BBT72VS00	CmoCh04G008570	4.40975	bifunctional aspartate aminotransferase and glutamate/aspartate-prephenate aminotransferase
BBT72VS00	CmoCh02G001400	4.41017	coumaroyl-CoA:anthocyanidin 3-O-glucoside-6''-O-coumaroyltransferase 1-like
BBT72VS00	CmoCh18G009150	4.41267	Pectate lyase
BBT12VS00	CmoCh02G016420	4.4143	beta-amyrin 11-oxidase-like
BBT72VS00	CmoCh19G006120	4.4148	Glycosyltransferase
BBT72VS00	CmoCh11G016280	4.41515	EF hand calcium-binding protein family
BBT120VS00	CmoCh19G004020	4.42086	Ankyrin repeat-containing protein
BBT72VS00	CmoCh16G002100	4.42261	Unknown protein
BBT72VS00	CmoCh02G012510	4.43363	Peroxidase
BBT120VS00	CmoCh03G011490	4.43481	Germin-like protein
BBT72VS00	CmoCh11G004470	4.43651	Unknown protein
BBT72VS00	CmoCh02G001020	4.43784	Phospho-N-acetylmuramoyl-pentapeptide-transferase, putative
BBT24VS00	CmoCh12G006800	4.43878	phosphate transporter PHO1 homolog 3-like
BBT72VS00	CmoCh04G022550	4.43973	Glutamate decarboxylase
BBT72VS00	CmoCh14G002940	4.44073	PEBP (phosphatidylethanolamine-binding protein) family protein
BBT72VS00	CmoCh03G009400	4.44104	Phytosulfokine-beta
BBT72VS00	CmoCh04G001170	4.44182	Neuronal PAS domain-containing protein 4
BBT72VS00	CmoCh03G009640	4.44432	Peroxidase
BBT72VS00	CmoCh07G002850	4.45269	cysteine-rich receptor-like protein kinase 29
BBT72VS00	CmoCh20G002170	4.45353	Cell wall integrity and stress response component 1
BBT72VS00	CmoCh03G008600	4.46166	Phospho-2-dehydro-3-deoxyheptonate aldolase
BBT24VS00	CmoCh16G011510	4.46327	AAI domain-containing protein
BBT72VS00	CmoCh14G016850	4.47079	CASP-like protein
BBT72VS00	CmoCh04G005840	4.47138	beta-glucuronosyltransferase GlcAT14B-like
BBT72VS00	CmoCh13G008640	4.4734	root hair specific 4
BBT72VS00	CmoCh06G007490	4.47349	Phospholipase D
BBT120VS00	CmoCh20G000300	4.47577	Unknown protein
BBT120VS00	CmoCh20G000510	4.48319	Unknown protein
BBT120VS00	CmoCh04G025550	4.49222	extensin-1-like
BBT72VS00	CmoCh11G013950	4.49388	Glycosyltransferase
BBT72VS00	CmoCh06G013020	4.49475	mitochondrial import receptor subunit TOM9-2-like
BBT72VS00	CmoCh06G013730	4.49787	Unknown protein
BBT72VS00	CmoCh13G011100	4.50088	ABC transporter B family member 25-like
BBT120VS00	CmoCh03G005530	4.50275	Patatin
BBT120VS00	CmoCh11G006400	4.50612	E3 ubiquitin-protein ligase ATL42-like
BBT120VS00	CmoCh20G008750	4.5109	Non-symbiotic hemoglobin
BBT72VS00	CmoCh18G006650	4.51198	Ferredoxin
BBT72VS00	CmoCh08G002040	4.51255	pfkB-like carbohydrate kinase family protein
BBT12VS00	CmoCh18G004980	4.51276	FAD-binding Berberine family protein
BBT72VS00	CmoCh11G006130	4.51491	Unknown protein
BBT72VS00	CmoCh06G009570	4.51814	NAC domain-containing protein 40-like
BBT24VS00	CmoCh17G007170	4.52038	transcription factor bHLH87-like
BBT120VS00	CmoCh20G000520	4.52364	Peroxidase
BBT72VS00	CmoCh03G011670	4.52498	PDR8
BBT12VS00	CmoCh08G010620	4.52539	ethylene-responsive transcription factor 1B-like
BBT120VS00	CmoCh09G000240	4.52655	protein PIN-LIKES 3-like
BBT72VS00	CmoCh14G015060	4.52943	Unknown protein
BBT12VS00	CmoCh13G003330	4.5419	WEB family protein At1g12150-like
BBT72VS00	CmoCh14G003100	4.54516	Glutaredoxin domain-containing protein
BBT72VS00	CmoCh10G008600	4.54594	Tyrosine-protein phosphatase
BBT72VS00	CmoCh01G018180	4.54614	Myb transcription factor
BBT72VS00	CmoCh15G014280	4.54826	Peroxidase
BBT120VS00	CmoCh19G005380	4.5492	Pathogenesis-related protein-1-like protein
BBT72VS00	CmoCh03G008010	4.55108	Unknown protein
BBT72VS00	CmoCh14G013160	4.55115	Leucine-rich repeat protein kinase family protein
BBT120VS00	CmoCh02G004930	4.55372	benzyl alcohol O-benzoyltransferase-like
BBT72VS00	CmoCh07G007330	4.55611	CDPK-related kinase
BBT72VS00	CmoCh14G004310	4.55647	Myb family transcription factor family protein
BBT72VS00	CmoCh19G001010	4.55757	transcription factor MYB4-like
BBT72VS00	CmoCh19G005890	4.56704	Plant basic secretory protein (BSP) family protein
BBT120VS00	CmoCh20G005410	4.56833	Glycosyltransferase
BBT120VS00	CmoCh12G004770	4.56963	calmodulin-like protein 12
BBT72VS00	CmoCh19G002520	4.57077	Unknown protein
BBT72VS00	CmoCh08G010620	4.57325	ethylene-responsive transcription factor 1B-like
BBT72VS00	CmoCh18G008770	4.57583	Annexin
BBT12VS00	CmoCh18G004790	4.58282	cationic amino acid transporter 1-like
BBT72VS00	CmoCh03G010070	4.58384	GLABRA2 expression modulator
BBT72VS00	CmoCh02G011180	4.58771	acidic endochitinase-like
BBT120VS00	CmoCh01G011450	4.59718	pirin-like protein
BBT72VS00	CmoCh19G007970	4.60735	NAC domain-containing protein
BBT120VS00	CmoCh18G008150	4.60868	GRAM domain-containing protein
BBT72VS00	CmoCh19G004470	4.61702	expansin-like B1
BBT72VS00	CmoCh14G018200	4.61963	Proteinase inhibitor
BBT72VS00	CmoCh14G009600	4.61987	PMEI domain-containing protein
BBT72VS00	CmoCh15G006080	4.62066	serine decarboxylase-like
BBT120VS00	CmoCh17G009160	4.62381	cytochrome P450 705A22-like
BBT72VS00	CmoCh01G000840	4.63048	Leucine-rich repeat protein kinase family protein
BBT72VS00	CmoCh20G001200	4.6345	ABC transporter G family member 23
BBT72VS00	CmoCh09G006410	4.63606	Hexosyltransferase
BBT12VS00	CmoCh12G006800	4.63759	phosphate transporter PHO1 homolog 3-like
BBT72VS00	CmoCh04G025550	4.64573	extensin-1-like
BBT24VS00	CmoCh01G005430	4.65185	Xyloglucan endotransglucosylase/hydrolase
BBT72VS00	CmoCh01G009100	4.65239	Endoglucanase
BBT120VS00	CmoCh02G010630	4.65427	protein TPX2-like isoform X3
BBT72VS00	CmoCh03G008620	4.65505	Polyadenylate-binding protein 2-like
BBT72VS00	CmoCh17G006910	4.65509	beta-fructofuranosidase, insoluble isoenzyme CWINV1-like
BBT72VS00	CmoCh03G008610	4.65793	Unknown protein
BBT72VS00	CmoCh04G011250	4.66453	WRKY protein
BBT72VS00	CmoCh19G000660	4.66865	Pumpkin fruit trypsin inhibitor
BBT120VS00	CmoCh07G002420	4.67098	heat stress transcription factor B-2a-like
BBT72VS00	CmoCh03G009450	4.67711	VQ domain-containing protein
BBT72VS00	CmoCh14G003330	4.67721	Protein GL2-INTERACTING REPRESSOR 1
BBT72VS00	CmoCh06G004030	4.68984	Glycosyltransferase
BBT120VS00	CmoCh05G003720	4.6915	Flotillin-like
BBT120VS00	CmoCh04G020380	4.69332	calmodulin-like
BBT72VS00	CmoCh04G018510	4.69364	Protein DETOXIFICATION
BBT72VS00	CmoCh10G001660	4.69638	protein EDS1L-like
BBT72VS00	CmoCh01G004520	4.69832	Aluminium induced protein with YGL and LRDR motifs
BBT72VS00	CmoCh01G018840	4.70032	Unknown protein
BBT120VS00	CmoCh20G002880	4.70078	Transmembrane protein, putative
BBT72VS00	CmoCh19G006330	4.70198	Protein of unknown function (DUF1645)
BBT120VS00	CmoCh01G005700	4.70276	Laccase
BBT72VS00	CmoCh20G006360	4.70719	cellulose synthase-like protein H1
BBT72VS00	CmoCh04G000970	4.70799	WRKY transcription factor 55
BBT72VS00	CmoCh12G007990	4.71106	Plant protein of unknown function (DUF868)
BBT12VS00	CmoCh19G000680	4.72395	Serine proteinase inhibitor
BBT72VS00	CmoCh14G006690	4.72563	polygalacturonase QRT3-like
BBT120VS00	CmoCh15G004210	4.72694	Unknown protein
BBT72VS00	CmoCh15G007040	4.73962	MYB transcription factor
BBT12VS00	CmoCh19G000690	4.74068	Serine proteinase inhibitor
BBT72VS00	CmoCh04G026710	4.74152	DUF4050 domain-containing protein
BBT72VS00	CmoCh11G009910	4.75019	L-allo-threonine aldolase
BBT72VS00	CmoCh14G000700	4.75056	lactosylceramide 4-alpha-galactosyltransferase-like
BBT72VS00	CmoCh02G016140	4.75091	expansin-like B1
BBT72VS00	CmoCh01G012250	4.75537	Receptor-like serine/threonine-protein kinase
BBT72VS00	CmoCh01G019210	4.76672	Protein of unknown function (DUF1645)
BBT12VS00	CmoCh14G001730	4.77067	protein REVEILLE 8 isoform X2
BBT120VS00	CmoCh01G013700	4.773	aspartyl protease family protein 2-like
BBT72VS00	CmoCh18G010850	4.78079	Protein of unknown function (DUF1262)
BBT120VS00	CmoCh12G004750	4.78192	calmodulin-like protein 12
BBT72VS00	CmoCh15G014290	4.78545	Peroxidase
BBT72VS00	CmoCh11G013930	4.79326	Cinnamyl alcohol dehydrogenase
BBT72VS00	CmoCh02G011530	4.79478	protein PSY2
BBT120VS00	CmoCh14G004380	4.80084	BZIP transcription factor family protein
BBT12VS00	CmoCh03G009450	4.80152	VQ domain-containing protein
BBT72VS00	CmoCh19G005480	4.80323	pathogenesis-related protein 1-like
BBT120VS00	CmoCh09G007220	4.80365	HTH myb-type domain-containing protein
BBT12VS00	CmoCh01G008880	4.804	Ankyrin repeat-containing protein
BBT120VS00	CmoCh02G006300	4.80471	Coiled-coil domain-containing protein 18, putative isoform 2
BBT72VS00	CmoCh15G014680	4.80954	receptor-like protein 12 isoform X1
BBT72VS00	CmoCh05G012490	4.81158	Ankyrin repeat-containing protein
BBT120VS00	CmoCh12G011370	4.81495	Calcium-transporting ATPase
BBT72VS00	CmoCh12G001140	4.8154	Phosphoglycerate mutase (2,3-diphosphoglycerate-dependent)
BBT120VS00	CmoCh18G011760	4.81703	glutathione S-transferase U10-like
BBT72VS00	CmoCh10G005750	4.8187	cucumber peeling cupredoxin-like
BBT72VS00	CmoCh06G009970	4.81989	Phosphoglycerate mutase family protein
BBT72VS00	CmoCh04G015290	4.82459	Pectinesterase
BBT72VS00	CmoCh07G009470	4.82538	Phenylalanine ammonia-lyase
BBT72VS00	CmoCh05G007840	4.82674	Endoglucanase
BBT72VS00	CmoCh13G001120	4.83233	Haloacid dehalogenase-like hydrolase (HAD) superfamily protein
BBT72VS00	CmoCh14G013560	4.83242	pleiotropic drug resistance protein 1-like
BBT120VS00	CmoCh04G001050	4.83896	MLP-like protein 328
BBT72VS00	CmoCh14G013170	4.84055	Leucine-rich repeat protein kinase family protein
BBT120VS00	CmoCh11G009630	4.84465	Tyrosine phosphatase family protein
BBT120VS00	CmoCh04G025210	4.8578	wall-associated receptor kinase 2-like
BBT12VS00	CmoCh13G006750	4.85899	lactosylceramide 4-alpha-galactosyltransferase-like
BBT72VS00	CmoCh09G000510	4.86424	12-oxophytodienoate reductase 1
BBT120VS00	CmoCh10G008440	4.8755	wall-associated receptor kinase-like 2
BBT72VS00	CmoCh04G015120	4.87981	cucumisin-like
BBT72VS00	CmoCh12G008030	4.88111	Arogenate dehydratase
BBT24VS00	CmoCh11G011330	4.88313	organ-specific protein S2-like isoform X3
BBT120VS00	CmoCh16G011940	4.8866	HMA domain-containing protein
BBT120VS00	CmoCh09G006740	4.88676	cytochrome P450 CYP72A219-like
BBT72VS00	CmoCh19G008710	4.88681	sodium/potassium/calcium exchanger 1-like
BBT120VS00	CmoCh07G007400	4.88823	salicylic acid-binding protein 2-like
BBT72VS00	CmoCh05G004310	4.89686	ankyrin repeat-containing protein ITN1-like
BBT72VS00	CmoCh18G005030	4.89828	berberine bridge enzyme-like 18
BBT72VS00	CmoCh11G007680	4.9107	Sucrose synthase
BBT120VS00	CmoCh04G018510	4.91158	Protein DETOXIFICATION
BBT120VS00	CmoCh12G010430	4.9122	H(+)-exporting diphosphatase
BBT120VS00	CmoCh11G002830	4.91257	transcription factor JAMYB-like
BBT72VS00	CmoCh17G001650	4.91319	Inorganic phosphate transporter 1-1
BBT72VS00	CmoCh14G014960	4.91545	Protein of unknown function (DUF 3339)
BBT72VS00	CmoCh09G007510	4.91851	protein MODIFYING WALL LIGNIN-2-like
BBT120VS00	CmoCh09G011070	4.92742	extensin-3-like isoform X1
BBT12VS00	CmoCh14G001940	4.93057	transcription initiation factor TFIID subunit 7-like
BBT12VS00	CmoCh17G008030	4.93076	2-oxoglutarate (2OG) and Fe(II)-dependent oxygenase superfamily protein
BBT72VS00	CmoCh14G018470	4.9339	Inorganic phosphate transporter 1-1
BBT120VS00	CmoCh08G006440	4.93773	thionin-like protein 2
BBT120VS00	CmoCh05G006180	4.93809	carotenoid cleavage dioxygenase 8 homolog B, chloroplastic-like
BBT120VS00	CmoCh17G000130	4.95208	LysM domain-containing protein
BBT72VS00	CmoCh03G002730	4.95472	RING-type E3 ubiquitin transferase
BBT72VS00	CmoCh15G011400	4.95646	cucumisin-like
BBT72VS00	CmoCh06G009680	4.96073	protein mago nashi homolog
BBT120VS00	CmoCh19G006120	4.96172	Glycosyltransferase
BBT72VS00	CmoCh14G012180	4.96776	cytochrome P450 71A1-like
BBT72VS00	CmoCh01G013470	4.96818	Glycosyltransferase
BBT120VS00	CmoCh18G004790	4.96902	cationic amino acid transporter 1-like
[truncated: 649 more rows]
