# Supplementary material
Source: MDPI journal article supplement (https://www.mdpi.com/2673-7140/3/4/56)
Supplement: s1 [file s1 › Supplementary Table S3.xlsx]

## Sheet: 394-1-27-12_Down
Supplementary Table S3 Gene ontology (GO) enrichment analysis reveals transcriptional and co-functional network of the DEGs among resistant and susceptible genotypes
Gene Ontology term	Cluster frequency	Genome frequency of use	Corrected P-value	Genes annotated to the term
GO:0009733	34 out of 503 genes, 6.8%	245 out of 32205 genes, 0.8%	<0.001	CmoCh20G007910 , CmoCh12G008890 , CmoCh20G007900 , CmoCh02G003380 , CmoCh02G003430 , CmoCh20G007890 , CmoCh17G011940 , CmoCh20G007800 , CmoCh14G013540 , CmoCh02G003530 , CmoCh20G007850 , CmoCh20G007880 , CmoCh20G007920 , CmoCh02G003420 , CmoCh01G001250 , CmoCh08G010880 , CmoCh06G009490 , CmoCh02G003410 , CmoCh11G007400 , CmoCh17G001860 , CmoCh20G007830 , CmoCh11G017130 , CmoCh08G003030 , CmoCh05G…
response to auxin
GO:0009719	38 out of 503 genes, 7.6%	679 out of 32205 genes, 2.1%	<0.001	CmoCh20G007910 , CmoCh12G008890 , CmoCh02G003380 , CmoCh02G003430 , CmoCh20G007900 , CmoCh20G007890 , CmoCh01G019880 , CmoCh17G011940 , CmoCh20G007800 , CmoCh14G013540 , CmoCh20G007850 , CmoCh02G003530 , CmoCh20G007880 , CmoCh20G007920 , CmoCh02G003420 , CmoCh20G001750 , CmoCh06G009490 , CmoCh08G010880 , CmoCh01G001250 , CmoCh02G003410 , CmoCh17G001860 , CmoCh11G007400 , CmoCh11G017130 , CmoCh20G…
response to endogenous stimulus
GO:0009725	36 out of 503 genes, 7.2%	642 out of 32205 genes, 2.0%	<0.001	CmoCh17G001860 , CmoCh11G007400 , CmoCh20G007830 , CmoCh11G017130 , CmoCh08G003030 , CmoCh05G003000 , CmoCh20G001750 , CmoCh08G010880 , CmoCh06G009490 , CmoCh01G001250 , CmoCh02G003410 , CmoCh08G001220 , CmoCh20G007940 , CmoCh11G017140 , CmoCh07G009450 , CmoCh01G001260 , CmoCh02G003440 , CmoCh20G007930 , CmoCh01G020200 , CmoCh17G006430 , CmoCh20G007870 , CmoCh02G003430 , CmoCh02G003380 , CmoCh20G…
response to hormone
GO:0010033	40 out of 503 genes, 8.0%	1005 out of 32205 genes, 3.1%	<0.001	CmoCh12G008890 , CmoCh20G007910 , CmoCh20G007900 , CmoCh02G003380 , CmoCh02G003430 , CmoCh17G011940 , CmoCh14G002940 , CmoCh01G019880 , CmoCh20G007890 , CmoCh12G009910 , CmoCh14G013540 , CmoCh20G007800 , CmoCh20G007880 , CmoCh02G003530 , CmoCh20G007850 , CmoCh02G003420 , CmoCh20G007920 , CmoCh20G001750 , CmoCh02G003410 , CmoCh01G001250 , CmoCh08G010880 , CmoCh06G009490 , CmoCh11G017130 , CmoCh20G…
response to organic substance
GO:0042221	49 out of 503 genes, 9.7%	1398 out of 32205 genes, 4.3%	<0.001	CmoCh06G009490 , CmoCh08G010880 , CmoCh01G001250 , CmoCh02G003410 , CmoCh04G018510 , CmoCh04G025770 , CmoCh20G001750 , CmoCh08G003030 , CmoCh05G003000 , CmoCh17G001860 , CmoCh11G007400 , CmoCh20G007830 , CmoCh11G017130 , CmoCh04G000560 , CmoCh17G006430 , CmoCh20G007870 , CmoCh11G019010 , CmoCh11G002590 , CmoCh11G007320 , CmoCh01G020200 , CmoCh02G003440 , CmoCh20G007930 , CmoCh08G001220 , CmoCh20G…
response to chemical
GO:0009734	11 out of 503 genes, 2.2%	95 out of 32205 genes, 0.3%	<0.001	CmoCh06G009490 , CmoCh08G010880 , CmoCh01G001250 , CmoCh14G013540 , CmoCh12G008890 , CmoCh17G011940 , CmoCh08G003030 , CmoCh17G001860 , CmoCh08G001220 , CmoCh11G007400 , CmoCh01G001260
auxin-activated signaling pathway
GO:0071365	11 out of 503 genes, 2.2%	95 out of 32205 genes, 0.3%	<0.001	CmoCh08G003030 , CmoCh11G007400 , CmoCh08G001220 , CmoCh17G001860 , CmoCh01G001260 , CmoCh01G001250 , CmoCh08G010880 , CmoCh06G009490 , CmoCh14G013540 , CmoCh17G011940 , CmoCh12G008890
cellular response to auxin stimulus
GO:0006355	57 out of 503 genes, 11.3%	1871 out of 32205 genes, 5.8%	0.001	CmoCh17G001860 , CmoCh08G001950 , CmoCh16G003830 , CmoCh02G016080 , CmoCh09G007950 , CmoCh08G003030 , CmoCh02G010610 , CmoCh04G008280 , CmoCh11G013590 , CmoCh12G006270 , CmoCh16G001450 , CmoCh08G010880 , CmoCh06G009490 , CmoCh14G001270 , CmoCh01G001250 , CmoCh04G000760 , CmoCh14G013060 , CmoCh06G008260 , CmoCh04G025770 , CmoCh08G001220 , CmoCh04G031510 , CmoCh01G001920 , CmoCh01G001260 , CmoCh06G…
regulation of transcription, DNA-templated
GO:1903506	57 out of 503 genes, 11.3%	1871 out of 32205 genes, 5.8%	0.001	CmoCh16G003830 , CmoCh08G001950 , CmoCh02G016080 , CmoCh17G001860 , CmoCh11G013590 , CmoCh04G008280 , CmoCh08G003030 , CmoCh09G007950 , CmoCh02G010610 , CmoCh16G001450 , CmoCh12G006270 , CmoCh04G025770 , CmoCh06G008260 , CmoCh14G013060 , CmoCh14G001270 , CmoCh04G000760 , CmoCh01G001250 , CmoCh08G010880 , CmoCh06G009490 , CmoCh01G001260 , CmoCh04G031510 , CmoCh01G001920 , CmoCh08G001220 , CmoCh06G…
regulation of nucleic acid-templated transcription
GO:2001141	57 out of 503 genes, 11.3%	1871 out of 32205 genes, 5.8%	0.001	CmoCh08G001950 , CmoCh16G003830 , CmoCh02G016080 , CmoCh17G001860 , CmoCh04G008280 , CmoCh11G013590 , CmoCh09G007950 , CmoCh08G003030 , CmoCh02G010610 , CmoCh16G001450 , CmoCh12G006270 , CmoCh04G025770 , CmoCh06G008260 , CmoCh14G013060 , CmoCh01G001250 , CmoCh14G001270 , CmoCh04G000760 , CmoCh08G010880 , CmoCh06G009490 , CmoCh01G001920 , CmoCh04G031510 , CmoCh01G001260 , CmoCh08G001220 , CmoCh06G…
regulation of RNA biosynthetic process
GO:0042752	6 out of 503 genes, 1.2%	27 out of 32205 genes, 0.1%	0.002	CmoCh04G000760 , CmoCh15G005830 , CmoCh04G011030 , CmoCh04G011860 , CmoCh04G025770 , CmoCh10G009890
regulation of circadian rhythm
GO:0051252	57 out of 503 genes, 11.3%	1943 out of 32205 genes, 6.0%	0.004	CmoCh07G001480 , CmoCh08G001220 , CmoCh04G031510 , CmoCh01G001260 , CmoCh01G001920 , CmoCh06G001020 , CmoCh16G001450 , CmoCh12G006270 , CmoCh14G001270 , CmoCh01G001250 , CmoCh04G000760 , CmoCh08G010880 , CmoCh06G009490 , CmoCh04G025770 , CmoCh06G008260 , CmoCh14G013060 , CmoCh17G001860 , CmoCh16G003830 , CmoCh08G001950 , CmoCh02G016080 , CmoCh02G010610 , CmoCh09G007950 , CmoCh08G003030 , CmoCh11G…
regulation of RNA metabolic process
GO:0050896	84 out of 503 genes, 16.7%	3348 out of 32205 genes, 10.4%	0.01	CmoCh11G017130 , CmoCh20G007830 , CmoCh02G006100 , CmoCh17G001860 , CmoCh18G011180 , CmoCh08G003030 , CmoCh20G001750 , CmoCh14G010720 , CmoCh04G025770 , CmoCh04G011860 , CmoCh01G009400 , CmoCh04G000760 , CmoCh20G009250 , CmoCh11G017140 , CmoCh07G009450 , CmoCh01G001260 , CmoCh11G014110 , CmoCh08G001220 , CmoCh20G007940 , CmoCh20G007930 , CmoCh15G009830 , CmoCh20G002680 , CmoCh11G007320 , CmoCh01G…
response to stimulus
GO:0019219	57 out of 503 genes, 11.3%	2005 out of 32205 genes, 6.2%	0.01	CmoCh17G001860 , CmoCh08G001950 , CmoCh16G003830 , CmoCh02G016080 , CmoCh09G007950 , CmoCh02G010610 , CmoCh08G003030 , CmoCh11G013590 , CmoCh04G008280 , CmoCh12G006270 , CmoCh16G001450 , CmoCh08G010880 , CmoCh06G009490 , CmoCh14G001270 , CmoCh04G000760 , CmoCh01G001250 , CmoCh14G013060 , CmoCh06G008260 , CmoCh04G025770 , CmoCh08G001220 , CmoCh01G001260 , CmoCh04G031510 , CmoCh01G001920 , CmoCh06G…
regulation of nucleobase-containing compound metabolic process
GO:0010411	7 out of 503 genes, 1.4%	49 out of 32205 genes, 0.2%	0.01	CmoCh16G007900 , CmoCh19G010950 , CmoCh04G009090 , CmoCh04G009080 , CmoCh10G004350 , CmoCh19G010940 , CmoCh19G010930
xyloglucan metabolic process
GO:0010556	58 out of 503 genes, 11.5%	2138 out of 32205 genes, 6.6%	0.02	CmoCh09G012450 , CmoCh16G010510 , CmoCh06G007280 , CmoCh15G011500 , CmoCh15G005830 , CmoCh16G011670 , CmoCh18G012390 , CmoCh13G011460 , CmoCh04G007530 , CmoCh01G015350 , CmoCh01G014410 , CmoCh14G013540 , CmoCh04G005340 , CmoCh02G004800 , CmoCh01G008960 , CmoCh14G002940 , CmoCh17G011940 , CmoCh10G009890 , CmoCh03G002750 , CmoCh04G007400 , CmoCh01G001030 , CmoCh14G011800 , CmoCh16G001580 , CmoCh07G…
regulation of macromolecule biosynthetic process
GO:2000112	58 out of 503 genes, 11.5%	2138 out of 32205 genes, 6.6%	0.02	CmoCh14G013540 , CmoCh04G005340 , CmoCh02G004800 , CmoCh01G008960 , CmoCh14G002940 , CmoCh17G011940 , CmoCh10G009890 , CmoCh16G010510 , CmoCh06G007280 , CmoCh09G012450 , CmoCh15G011500 , CmoCh15G005830 , CmoCh16G011670 , CmoCh18G012390 , CmoCh04G007530 , CmoCh13G011460 , CmoCh01G015350 , CmoCh01G014410 , CmoCh16G001580 , CmoCh07G007230 , CmoCh04G011030 , CmoCh18G003670 , CmoCh12G008890 , CmoCh14G…
regulation of cellular macromolecule biosynthetic process
GO:0031326	58 out of 503 genes, 11.5%	2156 out of 32205 genes, 6.7%	0.025	CmoCh15G005830 , CmoCh15G011500 , CmoCh16G010510 , CmoCh06G007280 , CmoCh09G012450 , CmoCh01G014410 , CmoCh01G015350 , CmoCh13G011460 , CmoCh04G007530 , CmoCh18G012390 , CmoCh16G011670 , CmoCh02G004800 , CmoCh14G013540 , CmoCh04G005340 , CmoCh10G009890 , CmoCh17G011940 , CmoCh14G002940 , CmoCh01G008960 , CmoCh04G007400 , CmoCh03G002750 , CmoCh14G011800 , CmoCh01G001030 , CmoCh07G007230 , CmoCh04G…
regulation of cellular biosynthetic process
GO:0042592	18 out of 503 genes, 3.6%	384 out of 32205 genes, 1.2%	0.027	CmoCh08G003880 , CmoCh09G001270 , CmoCh02G010310 , CmoCh20G006540 , CmoCh01G019980 , CmoCh02G002010 , CmoCh19G009400 , CmoCh05G007450 , CmoCh05G013160 , CmoCh16G000770 , CmoCh14G003710 , CmoCh10G005920 , CmoCh11G015940 , CmoCh01G008340 , CmoCh04G022280 , CmoCh12G009550 , CmoCh14G001270 , CmoCh01G009400
homeostatic process
GO:0009889	58 out of 503 genes, 11.5%	2171 out of 32205 genes, 6.7%	0.027	CmoCh12G006270 , CmoCh16G001450 , CmoCh06G008260 , CmoCh04G025770 , CmoCh14G013060 , CmoCh04G000760 , CmoCh14G001270 , CmoCh01G001250 , CmoCh08G010880 , CmoCh06G009490 , CmoCh16G003830 , CmoCh08G001950 , CmoCh02G016080 , CmoCh17G001860 , CmoCh04G008280 , CmoCh11G013590 , CmoCh02G010610 , CmoCh09G007950 , CmoCh08G003030 , CmoCh07G001480 , CmoCh04G031510 , CmoCh01G001920 , CmoCh01G001260 , CmoCh08G…
regulation of biosynthetic process
GO:0010468	58 out of 503 genes, 11.5%	2196 out of 32205 genes, 6.8%	0.034	CmoCh08G001220 , CmoCh01G001260 , CmoCh04G031510 , CmoCh01G001920 , CmoCh01G010040 , CmoCh06G001020 , CmoCh07G001480 , CmoCh17G001860 , CmoCh16G003830 , CmoCh02G016080 , CmoCh08G001950 , CmoCh09G007950 , CmoCh08G003030 , CmoCh02G010610 , CmoCh11G013590 , CmoCh04G008280 , CmoCh16G001450 , CmoCh12G006270 , CmoCh01G001250 , CmoCh14G001270 , CmoCh04G000760 , CmoCh08G010880 , CmoCh06G009490 , CmoCh04G…
regulation of gene expression

## Sheet: 394-1-27-12_Up
Gene Ontology term	Cluster frequency	Genome frequency of use	Corrected P-value	Genes annotated to the term
GO:0010466	17 out of 812 genes, 2.1%	35 out of 32205 genes, 0.1%	<0.001	CmoCh19G000720 , CmoCh16G003360 , CmoCh14G018200 , CmoCh14G018210 , CmoCh06G001350 , CmoCh19G000680 , CmoCh19G000650 , CmoCh19G000690 , CmoCh19G000660 , CmoCh19G000670 , CmoCh16G013130 , CmoCh14G018220 , CmoCh16G009470 , CmoCh19G000740 , CmoCh19G000730 , CmoCh19G000700 , CmoCh16G013140
negative regulation of peptidase activity
GO:0052547	17 out of 812 genes, 2.1%	35 out of 32205 genes, 0.1%	<0.001	CmoCh16G003360 , CmoCh19G000720 , CmoCh06G001350 , CmoCh14G018210 , CmoCh14G018200 , CmoCh19G000680 , CmoCh19G000650 , CmoCh19G000690 , CmoCh19G000660 , CmoCh19G000670 , CmoCh16G009470 , CmoCh16G013130 , CmoCh14G018220 , CmoCh19G000740 , CmoCh19G000730 , CmoCh19G000700 , CmoCh16G013140
regulation of peptidase activity
GO:0045861	17 out of 812 genes, 2.1%	37 out of 32205 genes, 0.1%	<0.001	CmoCh19G000700 , CmoCh16G013140 , CmoCh19G000740 , CmoCh19G000730 , CmoCh19G000670 , CmoCh16G009470 , CmoCh14G018220 , CmoCh16G013130 , CmoCh19G000660 , CmoCh19G000650 , CmoCh19G000690 , CmoCh19G000680 , CmoCh16G003360 , CmoCh19G000720 , CmoCh14G018210 , CmoCh06G001350 , CmoCh14G018200
negative regulation of proteolysis
GO:0051346	17 out of 812 genes, 2.1%	38 out of 32205 genes, 0.1%	<0.001	CmoCh16G013140 , CmoCh19G000700 , CmoCh14G018220 , CmoCh16G013130 , CmoCh16G009470 , CmoCh19G000670 , CmoCh19G000730 , CmoCh19G000740 , CmoCh19G000690 , CmoCh19G000650 , CmoCh19G000660 , CmoCh14G018200 , CmoCh06G001350 , CmoCh14G018210 , CmoCh19G000720 , CmoCh16G003360 , CmoCh19G000680
negative regulation of hydrolase activity
GO:0030162	17 out of 812 genes, 2.1%	42 out of 32205 genes, 0.1%	<0.001	CmoCh19G000730 , CmoCh19G000740 , CmoCh16G009470 , CmoCh16G013130 , CmoCh14G018220 , CmoCh19G000670 , CmoCh16G013140 , CmoCh19G000700 , CmoCh19G000680 , CmoCh06G001350 , CmoCh14G018210 , CmoCh14G018200 , CmoCh19G000720 , CmoCh16G003360 , CmoCh19G000660 , CmoCh19G000690 , CmoCh19G000650
regulation of proteolysis
GO:0010951	15 out of 812 genes, 1.8%	31 out of 32205 genes, 0.1%	<0.001	CmoCh16G013140 , CmoCh19G000690 , CmoCh19G000700 , CmoCh19G000660 , CmoCh16G013130 , CmoCh14G018220 , CmoCh14G018200 , CmoCh16G009470 , CmoCh06G001350 , CmoCh14G018210 , CmoCh19G000720 , CmoCh19G000670 , CmoCh19G000730 , CmoCh19G000680 , CmoCh19G000740
negative regulation of endopeptidase activity
GO:0052548	15 out of 812 genes, 1.8%	31 out of 32205 genes, 0.1%	<0.001	CmoCh19G000660 , CmoCh19G000700 , CmoCh16G013140 , CmoCh19G000690 , CmoCh19G000740 , CmoCh19G000680 , CmoCh19G000730 , CmoCh19G000720 , CmoCh19G000670 , CmoCh14G018210 , CmoCh06G001350 , CmoCh16G009470 , CmoCh14G018220 , CmoCh16G013130 , CmoCh14G018200
regulation of endopeptidase activity
GO:0009611	19 out of 812 genes, 2.3%	73 out of 32205 genes, 0.2%	<0.001	CmoCh19G000670 , CmoCh16G009470 , CmoCh14G018220 , CmoCh16G013130 , CmoCh19G000740 , CmoCh19G000730 , CmoCh19G000700 , CmoCh17G007590 , CmoCh16G013140 , CmoCh19G000720 , CmoCh06G001350 , CmoCh14G018210 , CmoCh14G018200 , CmoCh19G000680 , CmoCh19G000650 , CmoCh19G000690 , CmoCh08G010590 , CmoCh19G000660 , CmoCh16G013110
response to wounding
GO:0043086	21 out of 812 genes, 2.6%	139 out of 32205 genes, 0.4%	<0.001	CmoCh14G009600 , CmoCh06G011760 , CmoCh13G005180 , CmoCh19G000700 , CmoCh16G013140 , CmoCh19G000740 , CmoCh19G000730 , CmoCh02G009980 , CmoCh19G000670 , CmoCh16G013130 , CmoCh14G018220 , CmoCh16G009470 , CmoCh19G000660 , CmoCh19G000650 , CmoCh19G000690 , CmoCh19G000680 , CmoCh19G000720 , CmoCh16G003360 , CmoCh14G018200 , CmoCh06G001350 , CmoCh14G018210
negative regulation of catalytic activity
GO:0044092	21 out of 812 genes, 2.6%	146 out of 32205 genes, 0.5%	<0.001	CmoCh19G000660 , CmoCh19G000690 , CmoCh19G000650 , CmoCh19G000680 , CmoCh14G018200 , CmoCh06G001350 , CmoCh14G018210 , CmoCh16G003360 , CmoCh19G000720 , CmoCh06G011760 , CmoCh14G009600 , CmoCh16G013140 , CmoCh13G005180 , CmoCh19G000700 , CmoCh19G000730 , CmoCh02G009980 , CmoCh19G000740 , CmoCh16G013130 , CmoCh14G018220 , CmoCh16G009470 , CmoCh19G000670
negative regulation of molecular function
GO:0006950	83 out of 812 genes, 10.2%	1649 out of 32205 genes, 5.1%	<0.001	CmoCh14G008620 , CmoCh11G011760 , CmoCh04G001640 , CmoCh08G001560 , CmoCh01G007710 , CmoCh14G015670 , CmoCh19G002840 , CmoCh05G012270 , CmoCh01G003190 , CmoCh03G009950 , CmoCh14G018460 , CmoCh01G003760 , CmoCh10G012230 , CmoCh10G012240 , CmoCh16G013110 , CmoCh02G012530 , CmoCh18G009140 , CmoCh16G009470 , CmoCh15G009040 , CmoCh19G000740 , CmoCh09G005060 , CmoCh03G006230 , CmoCh04G001050 , CmoCh15G…
response to stress
GO:0051336	18 out of 812 genes, 2.2%	129 out of 32205 genes, 0.4%	<0.001	CmoCh16G003360 , CmoCh19G000720 , CmoCh14G018210 , CmoCh06G001350 , CmoCh14G018200 , CmoCh19G000680 , CmoCh19G000650 , CmoCh19G000690 , CmoCh19G000660 , CmoCh19G000670 , CmoCh16G009470 , CmoCh16G013130 , CmoCh14G018220 , CmoCh19G000740 , CmoCh19G000730 , CmoCh19G000700 , CmoCh16G013140 , CmoCh14G013410
regulation of hydrolase activity
GO:0032269	17 out of 812 genes, 2.1%	115 out of 32205 genes, 0.4%	<0.001	CmoCh19G000660 , CmoCh19G000650 , CmoCh19G000690 , CmoCh19G000680 , CmoCh19G000720 , CmoCh16G003360 , CmoCh14G018210 , CmoCh06G001350 , CmoCh14G018200 , CmoCh19G000700 , CmoCh16G013140 , CmoCh19G000740 , CmoCh19G000730 , CmoCh19G000670 , CmoCh16G009470 , CmoCh14G018220 , CmoCh16G013130
negative regulation of cellular protein metabolic process
GO:0051248	17 out of 812 genes, 2.1%	115 out of 32205 genes, 0.4%	<0.001	CmoCh16G009470 , CmoCh14G018220 , CmoCh16G013130 , CmoCh19G000670 , CmoCh19G000730 , CmoCh19G000740 , CmoCh16G013140 , CmoCh19G000700 , CmoCh06G001350 , CmoCh14G018210 , CmoCh14G018200 , CmoCh16G003360 , CmoCh19G000720 , CmoCh19G000680 , CmoCh19G000690 , CmoCh19G000650 , CmoCh19G000660
negative regulation of protein metabolic process
GO:0055114	97 out of 812 genes, 11.9%	2362 out of 32205 genes, 7.3%	0.002	CmoCh02G009310 , CmoCh18G007500 , CmoCh20G003310 , CmoCh11G007100 , CmoCh18G005030 , CmoCh11G009740 , CmoCh11G009720 , CmoCh19G002840 , CmoCh01G010350 , CmoCh01G000320 , CmoCh06G013700 , CmoCh13G009730 , CmoCh11G011760 , CmoCh18G004980 , CmoCh13G003780 , CmoCh01G007020 , CmoCh16G000860 , CmoCh02G000640 , CmoCh09G002630 , CmoCh05G007700 , CmoCh17G009160 , CmoCh09G001800 , CmoCh18G005010 , CmoCh02G…
oxidation-reduction process
GO:0042743	13 out of 812 genes, 1.6%	143 out of 32205 genes, 0.4%	0.043	CmoCh02G012500 , CmoCh10G008250 , CmoCh17G004180 , CmoCh02G012520 , CmoCh03G010010 , CmoCh19G002840 , CmoCh11G013370 , CmoCh11G013380 , CmoCh01G007460 , CmoCh20G003430 , CmoCh17G009790 , CmoCh02G012530 , CmoCh20G010190
hydrogen peroxide metabolic process

## Sheet: Butterbush_Down
Gene Ontology term	Cluster frequency	Genome frequency of use	Corrected P-value	Genes annotated to the term
GO:0009638	6 out of 765 genes, 0.8%	12 out of 32205 genes, 0.0%	<0.001	CmoCh16G002600 , CmoCh01G007710 , CmoCh20G004870 , CmoCh16G002590 , CmoCh04G004250 , CmoCh02G008530
phototropism
GO:0010411	10 out of 765 genes, 1.3%	49 out of 32205 genes, 0.2%	<0.001	CmoCh19G009750 , CmoCh11G004020 , CmoCh11G004000 , CmoCh19G010950 , CmoCh19G010930 , CmoCh10G004370 , CmoCh18G008090 , CmoCh04G009080 , CmoCh19G010940 , CmoCh10G004350
xyloglucan metabolic process
GO:0009765	8 out of 765 genes, 1.0%	39 out of 32205 genes, 0.1%	0.001	CmoCh01G008340 , CmoCh11G001720 , CmoCh07G001300 , CmoCh07G010930 , CmoCh07G001290 , CmoCh02G000360 , CmoCh19G008790 , CmoCh04G027050
photosynthesis, light harvesting
GO:0018298	9 out of 765 genes, 1.2%	55 out of 32205 genes, 0.2%	0.002	CmoCh07G001290 , CmoCh02G000360 , CmoCh19G008790 , CmoCh06G015600 , CmoCh04G027050 , CmoCh11G001720 , CmoCh01G008340 , CmoCh07G001300 , CmoCh07G010930
protein-chromophore linkage
GO:0009637	10 out of 765 genes, 1.3%	74 out of 32205 genes, 0.2%	0.005	CmoCh04G004250 , CmoCh11G017640 , CmoCh16G002600 , CmoCh14G017310 , CmoCh16G000730 , CmoCh16G002590 , CmoCh20G004870 , CmoCh02G008530 , CmoCh04G025770 , CmoCh01G007710
response to blue light
GO:0006073	37 out of 765 genes, 4.8%	735 out of 32205 genes, 2.3%	0.011	CmoCh08G005180 , CmoCh10G004350 , CmoCh04G012020 , CmoCh04G012660 , CmoCh16G002050 , CmoCh18G008090 , CmoCh06G004890 , CmoCh19G010930 , CmoCh02G013060 , CmoCh04G023740 , CmoCh05G000200 , CmoCh17G002970 , CmoCh19G010940 , CmoCh19G008490 , CmoCh04G009080 , CmoCh15G008920 , CmoCh04G025770 , CmoCh04G028540 , CmoCh06G006860 , CmoCh01G018210 , CmoCh11G004000 , CmoCh19G009750 , CmoCh17G002480 , CmoCh14G…
cellular glucan metabolic process
GO:0044042	37 out of 765 genes, 4.8%	735 out of 32205 genes, 2.3%	0.011	CmoCh19G009750 , CmoCh11G004000 , CmoCh01G018210 , CmoCh06G006860 , CmoCh04G025770 , CmoCh04G028540 , CmoCh04G009080 , CmoCh15G008920 , CmoCh19G010940 , CmoCh19G008490 , CmoCh17G002970 , CmoCh05G000200 , CmoCh19G010930 , CmoCh04G023740 , CmoCh02G013060 , CmoCh06G004890 , CmoCh18G008090 , CmoCh16G002050 , CmoCh04G012660 , CmoCh04G012020 , CmoCh10G004350 , CmoCh08G005180 , CmoCh02G000790 , CmoCh11G…
glucan metabolic process
GO:0005976	41 out of 765 genes, 5.4%	893 out of 32205 genes, 2.8%	0.05	CmoCh04G009080 , CmoCh15G008920 , CmoCh19G010940 , CmoCh19G008490 , CmoCh17G002970 , CmoCh05G000200 , CmoCh01G018210 , CmoCh11G004000 , CmoCh19G009750 , CmoCh06G006860 , CmoCh04G025770 , CmoCh04G028540 , CmoCh16G002050 , CmoCh04G004250 , CmoCh04G012020 , CmoCh04G012660 , CmoCh08G005180 , CmoCh10G004350 , CmoCh14G015150 , CmoCh19G010930 , CmoCh04G023740 , CmoCh02G013060 , CmoCh18G008090 , CmoCh06G…
polysaccharide metabolic process

## Sheet: Butterbush_Up
Gene Ontology term	Cluster frequency	Genome frequency of use	Corrected P-value	Genes annotated to the term
GO:0055114	164 out of 1209 genes, 13.6%	2362 out of 32205 genes, 7.3%	<0.001	CmoCh03G009640 , CmoCh06G014520 , CmoCh06G017080 , CmoCh17G009790 , CmoCh11G007100 , CmoCh04G009340 , CmoCh01G007460 , CmoCh01G010340 , CmoCh18G004990 , CmoCh03G002380 , CmoCh16G002710 , CmoCh18G006650 , CmoCh06G001950 , CmoCh06G003640 , CmoCh10G010210 , CmoCh01G005700 , CmoCh13G009720 , CmoCh13G005050 , CmoCh16G009220 , CmoCh03G001720 , CmoCh12G001960 , CmoCh17G002270 , CmoCh14G000370 , CmoCh14G…
oxidation-reduction process
GO:0010466	16 out of 1209 genes, 1.3%	35 out of 32205 genes, 0.1%	<0.001	CmoCh19G000660 , CmoCh19G000740 , CmoCh14G018210 , CmoCh19G000670 , CmoCh06G001350 , CmoCh19G000650 , CmoCh12G011020 , CmoCh14G018200 , CmoCh19G000750 , CmoCh19G000690 , CmoCh19G000720 , CmoCh19G000700 , CmoCh19G000730 , CmoCh14G018220 , CmoCh16G003360 , CmoCh19G000680
negative regulation of peptidase activity
GO:0052547	16 out of 1209 genes, 1.3%	35 out of 32205 genes, 0.1%	<0.001	CmoCh19G000660 , CmoCh19G000740 , CmoCh14G018210 , CmoCh19G000670 , CmoCh06G001350 , CmoCh12G011020 , CmoCh19G000650 , CmoCh14G018200 , CmoCh19G000750 , CmoCh19G000720 , CmoCh19G000690 , CmoCh19G000700 , CmoCh19G000730 , CmoCh16G003360 , CmoCh14G018220 , CmoCh19G000680
regulation of peptidase activity
GO:0045861	16 out of 1209 genes, 1.3%	37 out of 32205 genes, 0.1%	<0.001	CmoCh12G011020 , CmoCh19G000650 , CmoCh14G018210 , CmoCh19G000670 , CmoCh06G001350 , CmoCh19G000740 , CmoCh19G000660 , CmoCh19G000680 , CmoCh16G003360 , CmoCh14G018220 , CmoCh19G000690 , CmoCh19G000720 , CmoCh19G000700 , CmoCh19G000730 , CmoCh14G018200 , CmoCh19G000750
negative regulation of proteolysis
GO:0051346	16 out of 1209 genes, 1.3%	38 out of 32205 genes, 0.1%	<0.001	CmoCh19G000660 , CmoCh19G000740 , CmoCh14G018210 , CmoCh19G000670 , CmoCh06G001350 , CmoCh19G000650 , CmoCh12G011020 , CmoCh14G018200 , CmoCh19G000750 , CmoCh19G000720 , CmoCh19G000690 , CmoCh19G000730 , CmoCh19G000700 , CmoCh14G018220 , CmoCh16G003360 , CmoCh19G000680
negative regulation of hydrolase activity
GO:0030162	16 out of 1209 genes, 1.3%	42 out of 32205 genes, 0.1%	<0.001	CmoCh14G018200 , CmoCh19G000750 , CmoCh19G000690 , CmoCh19G000720 , CmoCh19G000700 , CmoCh19G000730 , CmoCh14G018220 , CmoCh16G003360 , CmoCh19G000680 , CmoCh19G000660 , CmoCh19G000740 , CmoCh14G018210 , CmoCh19G000670 , CmoCh06G001350 , CmoCh12G011020 , CmoCh19G000650
regulation of proteolysis
GO:0010951	14 out of 1209 genes, 1.2%	31 out of 32205 genes, 0.1%	<0.001	CmoCh19G000700 , CmoCh19G000740 , CmoCh19G000730 , CmoCh19G000690 , CmoCh19G000720 , CmoCh19G000750 , CmoCh19G000660 , CmoCh14G018200 , CmoCh19G000680 , CmoCh12G011020 , CmoCh06G001350 , CmoCh14G018220 , CmoCh19G000670 , CmoCh14G018210
negative regulation of endopeptidase activity
GO:0052548	14 out of 1209 genes, 1.2%	31 out of 32205 genes, 0.1%	<0.001	CmoCh19G000750 , CmoCh14G018200 , CmoCh19G000660 , CmoCh19G000740 , CmoCh19G000700 , CmoCh19G000730 , CmoCh19G000690 , CmoCh19G000720 , CmoCh14G018220 , CmoCh19G000670 , CmoCh06G001350 , CmoCh14G018210 , CmoCh19G000680 , CmoCh12G011020
regulation of endopeptidase activity
GO:0042744	25 out of 1209 genes, 2.1%	126 out of 32205 genes, 0.4%	<0.001	CmoCh17G009790 , CmoCh20G006120 , CmoCh20G003420 , CmoCh20G000500 , CmoCh20G003430 , CmoCh19G002840 , CmoCh20G000490 , CmoCh03G009640 , CmoCh06G003640 , CmoCh02G012500 , CmoCh01G007460 , CmoCh20G000520 , CmoCh00G001280 , CmoCh17G004180 , CmoCh17G009780 , CmoCh20G003450 , CmoCh15G014280 , CmoCh15G001690 , CmoCh14G001930 , CmoCh11G013380 , CmoCh15G014290 , CmoCh11G013370 , CmoCh02G012520 , CmoCh19G…
hydrogen peroxide catabolic process
GO:0042743	26 out of 1209 genes, 2.2%	143 out of 32205 genes, 0.4%	<0.001	CmoCh01G007460 , CmoCh17G009780 , CmoCh17G004180 , CmoCh20G003450 , CmoCh20G000520 , CmoCh11G004480 , CmoCh00G001280 , CmoCh14G001930 , CmoCh11G013380 , CmoCh15G014290 , CmoCh15G001690 , CmoCh15G014280 , CmoCh19G002850 , CmoCh02G012520 , CmoCh00G001510 , CmoCh11G013370 , CmoCh20G003420 , CmoCh20G003430 , CmoCh20G000500 , CmoCh17G009790 , CmoCh20G006120 , CmoCh20G000490 , CmoCh19G002840 , CmoCh06G…
hydrogen peroxide metabolic process
GO:0006950	115 out of 1209 genes, 9.5%	1649 out of 32205 genes, 5.1%	<0.001	CmoCh14G016240 , CmoCh04G010570 , CmoCh10G012340 , CmoCh04G011960 , CmoCh12G003380 , CmoCh03G000560 , CmoCh13G010560 , CmoCh01G011470 , CmoCh18G009140 , CmoCh14G018210 , CmoCh04G011950 , CmoCh16G001000 , CmoCh06G006400 , CmoCh11G002090 , CmoCh17G003370 , CmoCh05G012280 , CmoCh20G003420 , CmoCh11G013370 , CmoCh02G004650 , CmoCh19G002850 , CmoCh02G012520 , CmoCh02G007690 , CmoCh02G012510 , CmoCh15G…
response to stress
GO:0006979	39 out of 1209 genes, 3.2%	323 out of 32205 genes, 1.0%	<0.001	CmoCh18G002430 , CmoCh11G018990 , CmoCh03G009640 , CmoCh17G007590 , CmoCh02G012500 , CmoCh20G003430 , CmoCh20G000500 , CmoCh20G006120 , CmoCh17G009790 , CmoCh06G015780 , CmoCh01G017050 , CmoCh01G004070 , CmoCh20G000490 , CmoCh19G002840 , CmoCh06G016570 , CmoCh14G001930 , CmoCh15G001690 , CmoCh15G014280 , CmoCh01G007460 , CmoCh20G003450 , CmoCh17G009780 , CmoCh00G001280 , CmoCh05G010560 , CmoCh20G…
response to oxidative stress
GO:0072593	27 out of 1209 genes, 2.2%	179 out of 32205 genes, 0.6%	<0.001	CmoCh05G010560 , CmoCh20G000520 , CmoCh11G004480 , CmoCh00G001280 , CmoCh17G009780 , CmoCh17G004180 , CmoCh20G003450 , CmoCh01G007460 , CmoCh11G013370 , CmoCh19G002850 , CmoCh02G012520 , CmoCh00G001510 , CmoCh15G001690 , CmoCh15G014280 , CmoCh14G001930 , CmoCh11G013380 , CmoCh15G014290 , CmoCh19G002840 , CmoCh20G000490 , CmoCh20G006120 , CmoCh17G009790 , CmoCh20G003420 , CmoCh20G003430 , CmoCh20G…
reactive oxygen species metabolic process
GO:0016998	12 out of 1209 genes, 1.0%	32 out of 32205 genes, 0.1%	<0.001	CmoCh03G006570 , CmoCh13G005480 , CmoCh11G004790 , CmoCh01G005430 , CmoCh05G012840 , CmoCh16G000880 , CmoCh03G006590 , CmoCh05G012800 , CmoCh02G011190 , CmoCh04G029660 , CmoCh11G004800 , CmoCh02G011180
cell wall macromolecule catabolic process
GO:0043086	23 out of 1209 genes, 1.9%	139 out of 32205 genes, 0.4%	<0.001	CmoCh19G000750 , CmoCh14G018200 , CmoCh06G011760 , CmoCh19G000730 , CmoCh19G000700 , CmoCh19G000720 , CmoCh19G000690 , CmoCh14G018220 , CmoCh16G003360 , CmoCh16G001940 , CmoCh19G000680 , CmoCh04G015290 , CmoCh14G020280 , CmoCh19G000660 , CmoCh02G009980 , CmoCh16G001950 , CmoCh19G000740 , CmoCh19G000670 , CmoCh06G001350 , CmoCh14G009600 , CmoCh14G018210 , CmoCh12G011020 , CmoCh19G000650
negative regulation of catalytic activity
GO:0044092	23 out of 1209 genes, 1.9%	146 out of 32205 genes, 0.5%	<0.001	CmoCh19G000650 , CmoCh12G011020 , CmoCh14G009600 , CmoCh14G018210 , CmoCh19G000670 , CmoCh06G001350 , CmoCh16G001950 , CmoCh19G000740 , CmoCh19G000660 , CmoCh02G009980 , CmoCh14G020280 , CmoCh04G015290 , CmoCh19G000680 , CmoCh16G001940 , CmoCh14G018220 , CmoCh16G003360 , CmoCh19G000690 , CmoCh19G000720 , CmoCh19G000730 , CmoCh19G000700 , CmoCh14G018200 , CmoCh06G011760 , CmoCh19G000750
negative regulation of molecular function
GO:0009611	16 out of 1209 genes, 1.3%	73 out of 32205 genes, 0.2%	<0.001	CmoCh19G000680 , CmoCh14G018220 , CmoCh19G000700 , CmoCh19G000730 , CmoCh19G000720 , CmoCh19G000690 , CmoCh08G010590 , CmoCh19G000750 , CmoCh14G018200 , CmoCh19G000650 , CmoCh17G007590 , CmoCh19G000670 , CmoCh06G001350 , CmoCh14G018210 , CmoCh19G000740 , CmoCh19G000660
response to wounding
GO:0006030	10 out of 1209 genes, 0.8%	25 out of 32205 genes, 0.1%	<0.001	CmoCh05G012840 , CmoCh16G000880 , CmoCh11G004790 , CmoCh03G006570 , CmoCh13G005480 , CmoCh02G011180 , CmoCh11G004800 , CmoCh05G012800 , CmoCh02G011190 , CmoCh03G006590
chitin metabolic process
GO:0006032	10 out of 1209 genes, 0.8%	25 out of 32205 genes, 0.1%	<0.001	CmoCh02G011180 , CmoCh11G004800 , CmoCh02G011190 , CmoCh05G012800 , CmoCh03G006590 , CmoCh16G000880 , CmoCh05G012840 , CmoCh11G004790 , CmoCh13G005480 , CmoCh03G006570
chitin catabolic process
GO:0046348	10 out of 1209 genes, 0.8%	25 out of 32205 genes, 0.1%	<0.001	CmoCh13G005480 , CmoCh03G006570 , CmoCh11G004790 , CmoCh16G000880 , CmoCh05G012840 , CmoCh03G006590 , CmoCh02G011190 , CmoCh05G012800 , CmoCh02G011180 , CmoCh11G004800
amino sugar catabolic process
GO:1901072	10 out of 1209 genes, 0.8%	25 out of 32205 genes, 0.1%	<0.001	CmoCh05G012800 , CmoCh02G011190 , CmoCh02G011180 , CmoCh11G004800 , CmoCh03G006590 , CmoCh05G012840 , CmoCh16G000880 , CmoCh03G006570 , CmoCh13G005480 , CmoCh11G004790
glucosamine-containing compound catabolic process
GO:1901071	10 out of 1209 genes, 0.8%	26 out of 32205 genes, 0.1%	<0.001	CmoCh11G004790 , CmoCh03G006570 , CmoCh13G005480 , CmoCh05G012840 , CmoCh16G000880 , CmoCh03G006590 , CmoCh02G011180 , CmoCh11G004800 , CmoCh05G012800 , CmoCh02G011190
glucosamine-containing compound metabolic process
GO:0044710	316 out of 1209 genes, 26.1%	6398 out of 32205 genes, 19.9%	<0.001	CmoCh18G004690 , CmoCh20G000650 , CmoCh06G016570 , CmoCh11G007530 , CmoCh20G008120 , CmoCh02G009150 , CmoCh20G000520 , CmoCh13G001860 , CmoCh08G004780 , CmoCh03G012290 , CmoCh02G006450 , CmoCh08G007730 , CmoCh05G007130 , CmoCh10G007000 , CmoCh11G001050 , CmoCh18G003480 , CmoCh07G005550 , CmoCh09G001800 , CmoCh07G012580 , CmoCh00G001510 , CmoCh15G014610 , CmoCh14G002230 , CmoCh13G007760 , CmoCh05G…
single-organism metabolic process
GO:0051336	19 out of 1209 genes, 1.6%	129 out of 32205 genes, 0.4%	<0.001	CmoCh19G000660 , CmoCh19G000740 , CmoCh14G018210 , CmoCh19G000670 , CmoCh06G001350 , CmoCh19G000650 , CmoCh18G000700 , CmoCh12G011020 , CmoCh14G018200 , CmoCh19G000750 , CmoCh19G000690 , CmoCh19G000720 , CmoCh19G000730 , CmoCh19G000700 , CmoCh14G013410 , CmoCh16G003360 , CmoCh14G018220 , CmoCh14G001510 , CmoCh19G000680
regulation of hydrolase activity
GO:0006040	16 out of 1209 genes, 1.3%	94 out of 32205 genes, 0.3%	<0.001	CmoCh11G004800 , CmoCh03G006590 , CmoCh05G012840 , CmoCh03G006570 , CmoCh13G005480 , CmoCh13G005050 , CmoCh12G013370 , CmoCh18G004980 , CmoCh05G012800 , CmoCh02G011190 , CmoCh02G011180 , CmoCh06G000470 , CmoCh18G004990 , CmoCh07G011690 , CmoCh16G000880 , CmoCh11G004790
amino sugar metabolic process
GO:0009808	12 out of 1209 genes, 1.0%	55 out of 32205 genes, 0.2%	<0.001	CmoCh02G006920 , CmoCh13G001860 , CmoCh03G003910 , CmoCh01G005700 , CmoCh17G008870 , CmoCh05G007700 , CmoCh11G013930 , CmoCh01G001900 , CmoCh20G003310 , CmoCh06G017080 , CmoCh01G001890 , CmoCh01G020440
lignin metabolic process
GO:0009072	29 out of 1209 genes, 2.4%	293 out of 32205 genes, 0.9%	0.001	CmoCh19G010770 , CmoCh03G012290 , CmoCh15G001460 , CmoCh01G004360 , CmoCh12G008030 , CmoCh02G001770 , CmoCh13G006760 , CmoCh06G011670 , CmoCh04G008570 , CmoCh14G020320 , CmoCh01G011110 , CmoCh12G001270 , CmoCh20G003310 , CmoCh03G012270 , CmoCh04G003140 , CmoCh05G007700 , CmoCh01G013690 , CmoCh11G009630 , CmoCh01G002480 , CmoCh11G001050 , CmoCh02G006920 , CmoCh07G005550 , CmoCh13G006770 , CmoCh03G…
aromatic amino acid family metabolic process
GO:0009698	15 out of 1209 genes, 1.2%	95 out of 32205 genes, 0.3%	0.001	CmoCh17G008870 , CmoCh03G012270 , CmoCh05G007700 , CmoCh03G012290 , CmoCh03G003910 , CmoCh01G005700 , CmoCh13G001860 , CmoCh02G006920 , CmoCh01G020440 , CmoCh07G009470 , CmoCh06G017080 , CmoCh01G001890 , CmoCh01G001900 , CmoCh11G013930 , CmoCh20G003310
phenylpropanoid metabolic process
GO:0009809	9 out of 1209 genes, 0.7%	34 out of 32205 genes, 0.1%	0.001	CmoCh17G008870 , CmoCh05G007700 , CmoCh02G006920 , CmoCh01G020440 , CmoCh01G001900 , CmoCh11G013930 , CmoCh20G003310 , CmoCh06G017080 , CmoCh01G001890
lignin biosynthetic process
GO:0050896	175 out of 1209 genes, 14.5%	3348 out of 32205 genes, 10.4%	0.002	CmoCh20G006510 , CmoCh15G014290 , CmoCh02G012510 , CmoCh11G013370 , CmoCh03G008470 , CmoCh10G011820 , CmoCh02G007690 , CmoCh20G008560 , CmoCh10G012350 , CmoCh17G004180 , CmoCh12G006010 , CmoCh14G010330 , CmoCh18G009140 , CmoCh14G016240 , CmoCh04G010570 , CmoCh04G011960 , CmoCh12G003380 , CmoCh06G009680 , CmoCh07G010570 , CmoCh17G003370 , CmoCh16G008670 , CmoCh10G001650 , CmoCh20G003420 , CmoCh16G…
response to stimulus
GO:0032269	16 out of 1209 genes, 1.3%	115 out of 32205 genes, 0.4%	0.002	CmoCh19G000650 , CmoCh12G011020 , CmoCh14G018210 , CmoCh06G001350 , CmoCh19G000670 , CmoCh19G000740 , CmoCh19G000660 , CmoCh19G000680 , CmoCh16G003360 , CmoCh14G018220 , CmoCh19G000720 , CmoCh19G000690 , CmoCh19G000730 , CmoCh19G000700 , CmoCh14G018200 , CmoCh19G000750
negative regulation of cellular protein metabolic process
GO:0051248	16 out of 1209 genes, 1.3%	115 out of 32205 genes, 0.4%	0.002	CmoCh19G000660 , CmoCh19G000740 , CmoCh14G018210 , CmoCh19G000670 , CmoCh06G001350 , CmoCh19G000650 , CmoCh12G011020 , CmoCh14G018200 , CmoCh19G000750 , CmoCh19G000690 , CmoCh19G000720 , CmoCh19G000730 , CmoCh19G000700 , CmoCh16G003360 , CmoCh14G018220 , CmoCh19G000680
negative regulation of protein metabolic process
GO:0009699	12 out of 1209 genes, 1.0%	69 out of 32205 genes, 0.2%	0.004	CmoCh02G006920 , CmoCh05G007700 , CmoCh03G012290 , CmoCh17G008870 , CmoCh03G012270 , CmoCh01G001890 , CmoCh06G017080 , CmoCh20G003310 , CmoCh01G001900 , CmoCh11G013930 , CmoCh01G020440 , CmoCh07G009470
phenylpropanoid biosynthetic process
GO:0009056	87 out of 1209 genes, 7.2%	1460 out of 32205 genes, 4.5%	0.011	CmoCh10G007420 , CmoCh02G009150 , CmoCh20G008120 , CmoCh13G001860 , CmoCh20G000520 , CmoCh03G003910 , CmoCh01G007460 , CmoCh03G012290 , CmoCh08G004780 , CmoCh01G003650 , CmoCh05G012800 , CmoCh11G001050 , CmoCh20G003430 , CmoCh17G009790 , CmoCh06G017080 , CmoCh01G009100 , CmoCh03G003860 , CmoCh03G009640 , CmoCh16G000880 , CmoCh05G007840 , CmoCh11G004790 , CmoCh07G007400 , CmoCh01G004360 , CmoCh00G…
catabolic process
GO:0006952	35 out of 1209 genes, 2.9%	430 out of 32205 genes, 1.3%	0.014	CmoCh14G001930 , CmoCh06G000220 , CmoCh08G009620 , CmoCh08G010590 , CmoCh11G016280 , CmoCh15G000470 , CmoCh05G012270 , CmoCh08G012220 , CmoCh02G014990 , CmoCh14G018460 , CmoCh07G012580 , CmoCh01G017050 , CmoCh03G006470 , CmoCh01G004070 , CmoCh07G006570 , CmoCh01G003190 , CmoCh02G007690 , CmoCh07G007400 , CmoCh07G008500 , CmoCh15G009030 , CmoCh17G012410 , CmoCh16G000880 , CmoCh04G010600 , CmoCh06G…
defense response
GO:0009810	8 out of 1209 genes, 0.7%	32 out of 32205 genes, 0.1%	0.014	CmoCh02G006920 , CmoCh17G008870 , CmoCh05G007700 , CmoCh11G013930 , CmoCh01G001900 , CmoCh20G003310 , CmoCh01G001890 , CmoCh01G020440
stilbene metabolic process
GO:0009811	8 out of 1209 genes, 0.7%	32 out of 32205 genes, 0.1%	0.014	CmoCh01G001890 , CmoCh11G013930 , CmoCh01G001900 , CmoCh20G003310 , CmoCh01G020440 , CmoCh02G006920 , CmoCh17G008870 , CmoCh05G007700
stilbene biosynthetic process
GO:0006026	11 out of 1209 genes, 0.9%	63 out of 32205 genes, 0.2%	0.014	CmoCh10G007420 , CmoCh16G000880 , CmoCh05G012840 , CmoCh11G004790 , CmoCh03G006570 , CmoCh13G005480 , CmoCh11G004800 , CmoCh02G011180 , CmoCh05G012800 , CmoCh02G011190 , CmoCh03G006590
aminoglycan catabolic process
GO:0044248	66 out of 1209 genes, 5.5%	1038 out of 32205 genes, 3.2%	0.019	CmoCh20G008120 , CmoCh02G009150 , CmoCh13G001860 , CmoCh20G000520 , CmoCh08G004780 , CmoCh03G012290 , CmoCh03G003910 , CmoCh01G007460 , CmoCh05G012800 , CmoCh01G003650 , CmoCh11G001050 , CmoCh17G009790 , CmoCh20G003430 , CmoCh01G009100 , CmoCh03G009640 , CmoCh05G007840 , CmoCh16G000880 , CmoCh01G004360 , CmoCh11G004790 , CmoCh00G001510 , CmoCh03G001720 , CmoCh05G012840 , CmoCh03G006570 , CmoCh13G…
cellular catabolic process
GO:0006558	16 out of 1209 genes, 1.3%	128 out of 32205 genes, 0.4%	0.019	CmoCh02G001770 , CmoCh12G008030 , CmoCh03G012290 , CmoCh15G001460 , CmoCh04G008570 , CmoCh06G011670 , CmoCh14G020320 , CmoCh20G003310 , CmoCh12G001270 , CmoCh05G007700 , CmoCh04G003140 , CmoCh03G012270 , CmoCh07G005550 , CmoCh02G006920 , CmoCh03G008600 , CmoCh07G009470
L-phenylalanine metabolic process
GO:1902221	16 out of 1209 genes, 1.3%	128 out of 32205 genes, 0.4%	0.019	CmoCh03G008600 , CmoCh07G009470 , CmoCh03G012270 , CmoCh04G003140 , CmoCh05G007700 , CmoCh02G006920 , CmoCh07G005550 , CmoCh14G020320 , CmoCh12G001270 , CmoCh20G003310 , CmoCh03G012290 , CmoCh15G001460 , CmoCh12G008030 , CmoCh02G001770 , CmoCh04G008570 , CmoCh06G011670
erythrose 4-phosphate/phosphoenolpyruvate family amino acid metabolic process
GO:1900674	10 out of 1209 genes, 0.8%	54 out of 32205 genes, 0.2%	0.024	CmoCh01G001890 , CmoCh01G001900 , CmoCh11G013930 , CmoCh20G003310 , CmoCh01G020440 , CmoCh11G020150 , CmoCh02G006920 , CmoCh17G008870 , CmoCh05G007700 , CmoCh17G004330
olefin biosynthetic process
GO:0006570	18 out of 1209 genes, 1.5%	162 out of 32205 genes, 0.5%	0.027	CmoCh10G008600 , CmoCh11G020160 , CmoCh13G006770 , CmoCh03G008600 , CmoCh07G009470 , CmoCh07G005550 , CmoCh11G009630 , CmoCh03G012270 , CmoCh12G001270 , CmoCh14G020320 , CmoCh06G011670 , CmoCh13G006760 , CmoCh04G008570 , CmoCh02G001770 , CmoCh12G008030 , CmoCh15G001460 , CmoCh03G012290 , CmoCh19G010770
tyrosine metabolic process
GO:0009064	19 out of 1209 genes, 1.6%	182 out of 32205 genes, 0.6%	0.045	CmoCh04G011660 , CmoCh04G022580 , CmoCh04G031130 , CmoCh20G008120 , CmoCh01G003900 , CmoCh04G030590 , CmoCh04G008570 , CmoCh04G003920 , CmoCh04G022550 , CmoCh12G003370 , CmoCh10G000680 , CmoCh04G013150 , CmoCh06G014520 , CmoCh03G001720 , CmoCh16G001000 , CmoCh11G001050 , CmoCh01G013730 , CmoCh12G001960 , CmoCh14G013440
glutamine family amino acid metabolic process

## Sheet: Sheet3
Gene Ontology term	Cluster frequency	Genome frequency of use	Corrected P-value	Genes annotated to the term
GO:0009638	6 out of 765 genes, 0.8%	12 out of 32205 genes, 0.0%	<0.001	CmoCh16G002600 , CmoCh01G007710 , CmoCh20G004870 , CmoCh16G002590 , CmoCh04G004250 , CmoCh02G008530
phototropism
GO:0010411	10 out of 765 genes, 1.3%	49 out of 32205 genes, 0.2%	<0.001	CmoCh19G009750 , CmoCh11G004020 , CmoCh11G004000 , CmoCh19G010950 , CmoCh19G010930 , CmoCh10G004370 , CmoCh18G008090 , CmoCh04G009080 , CmoCh19G010940 , CmoCh10G004350
xyloglucan metabolic process
GO:0009765	8 out of 765 genes, 1.0%	39 out of 32205 genes, 0.1%	0.001	CmoCh01G008340 , CmoCh11G001720 , CmoCh07G001300 , CmoCh07G010930 , CmoCh07G001290 , CmoCh02G000360 , CmoCh19G008790 , CmoCh04G027050
photosynthesis, light harvesting
GO:0018298	9 out of 765 genes, 1.2%	55 out of 32205 genes, 0.2%	0.002	CmoCh07G001290 , CmoCh02G000360 , CmoCh19G008790 , CmoCh06G015600 , CmoCh04G027050 , CmoCh11G001720 , CmoCh01G008340 , CmoCh07G001300 , CmoCh07G010930
protein-chromophore linkage
GO:0009637	10 out of 765 genes, 1.3%	74 out of 32205 genes, 0.2%	0.005	CmoCh04G004250 , CmoCh11G017640 , CmoCh16G002600 , CmoCh14G017310 , CmoCh16G000730 , CmoCh16G002590 , CmoCh20G004870 , CmoCh02G008530 , CmoCh04G025770 , CmoCh01G007710
response to blue light
GO:0006073	37 out of 765 genes, 4.8%	735 out of 32205 genes, 2.3%	0.011	CmoCh08G005180 , CmoCh10G004350 , CmoCh04G012020 , CmoCh04G012660 , CmoCh16G002050 , CmoCh18G008090 , CmoCh06G004890 , CmoCh19G010930 , CmoCh02G013060 , CmoCh04G023740 , CmoCh05G000200 , CmoCh17G002970 , CmoCh19G010940 , CmoCh19G008490 , CmoCh04G009080 , CmoCh15G008920 , CmoCh04G025770 , CmoCh04G028540 , CmoCh06G006860 , CmoCh01G018210 , CmoCh11G004000 , CmoCh19G009750 , CmoCh17G002480 , CmoCh14G…
cellular glucan metabolic process
GO:0044042	37 out of 765 genes, 4.8%	735 out of 32205 genes, 2.3%	0.011	CmoCh19G009750 , CmoCh11G004000 , CmoCh01G018210 , CmoCh06G006860 , CmoCh04G025770 , CmoCh04G028540 , CmoCh04G009080 , CmoCh15G008920 , CmoCh19G010940 , CmoCh19G008490 , CmoCh17G002970 , CmoCh05G000200 , CmoCh19G010930 , CmoCh04G023740 , CmoCh02G013060 , CmoCh06G004890 , CmoCh18G008090 , CmoCh16G002050 , CmoCh04G012660 , CmoCh04G012020 , CmoCh10G004350 , CmoCh08G005180 , CmoCh02G000790 , CmoCh11G…
glucan metabolic process
GO:0005976	41 out of 765 genes, 5.4%	893 out of 32205 genes, 2.8%	0.05	CmoCh04G009080 , CmoCh15G008920 , CmoCh19G010940 , CmoCh19G008490 , CmoCh17G002970 , CmoCh05G000200 , CmoCh01G018210 , CmoCh11G004000 , CmoCh19G009750 , CmoCh06G006860 , CmoCh04G025770 , CmoCh04G028540 , CmoCh16G002050 , CmoCh04G004250 , CmoCh04G012020 , CmoCh04G012660 , CmoCh08G005180 , CmoCh10G004350 , CmoCh14G015150 , CmoCh19G010930 , CmoCh04G023740 , CmoCh02G013060 , CmoCh18G008090 , CmoCh06G…
polysaccharide metabolic process
Biological process	Number of genes
Polysaccharide metabolic process	125
response to blue light	10
phototropism	6
photosynthesis, light harvesting	8
protein-chromophore linkage	9
