# Supplementary material
Source: MDPI journal article supplement (https://www.mdpi.com/2673-7140/3/4/56)
Supplement: s1 [file s1 › Supplementary Table S4.xlsx]

## Sheet: Supplementary Table 4 
Supplementary Table S4 List of stress response genes coexpressed at 72 and 120 hours post inoculation (hpi) in 394-1-27-12
Gene	Predicted function
CmoCh07G002420	Heat stress transcription factor B-2a
CmoCh16G013110	Unknown protein
CmoCh19G000650	Type I serine protease inhibitor
CmoCh05G012280	Wound-induced protein WIN1
CmoCh10G012340	Calmodulin-binding protein, putative, expressed
CmoCh01G007460	Putative heme-binding peroxidase
CmoCh17G007590	Protein PLANT CADMIUM RESISTANCE 8
CmoCh08G010590	(MYB transcription factor) (Myb DNA-binding protein) (Myb domain protein 14) (Myb family transcription factor)
CmoCh08G004800	Myb-like DNA-binding domain containing protein, expressed
CmoCh11G013370	Putative heme-binding peroxidase
CmoCh11G013380	Putative heme-binding peroxidase
CmoCh20G003430	Peroxidase (1.11.1.7)
CmoCh04G001050	(Major latex protein-like) (Polyketide cyclase/dehydrase and lipid transport superfamily protein)
CmoCh15G009030	Defensin-like protein 1
CmoCh14G018220	Proteinase inhibitor, putative
CmoCh06G001350	Protease inhibitor protein
CmoCh11G011760	(Respiratory burst oxidase, putative) (1.6.3.1)
CmoCh15G009040	Defensin-like protein 1
CmoCh05G012270	Wound-induced protein
CmoCh08G001560	SPX domain-containing 3-like protein
CmoCh19G000670	Proteinase inhibitor 1
CmoCh14G018210	Proteinase inhibitor
CmoCh10G012240	Calmodulin-binding protein, putative, expressed
CmoCh19G000720	Proteinase inhibitor 1
CmoCh14G018460	Ethylene-responsive transcription factor 1B
CmoCh04G022620	Defensin-like protein 6
CmoCh16G013140	Protease inhibitor protein
CmoCh07G007400	methyl esterase 1
CmoCh19G000660	Chymotrypsin inhibitor-2
CmoCh10G012220	Calmodulin-binding protein, putative, expressed
CmoCh14G018200	Proteinase inhibitor
