# Supplementary material
Source: MDPI journal article supplement (https://www.mdpi.com/2673-7140/3/4/56)
Supplement: s1 [file s1 › Supplementary Table S5.xlsx]

## Sheet: Supplementary Table 5 
Supplementary Table S5 List of oxidation-reduction genes coexpressed at 72 and 120 hours post inoculation (hpi) in 394-1-27-12
Gene	Predicted function
CmoCh11G011760	(Respiratory burst oxidase, putative) (1.6.3.1)
CmoCh03G012930	Glutaredoxin, putative
CmoCh05G007700	(Cinnamate-4-hydroxylase) (Cytochrome P450 protein)
CmoCh06G013700	Calmodulin 8 family protein
CmoCh17G002330	Glucose transport protein
CmoCh01G010360	Alcohol dehydrogenase
CmoCh18G004980	FAD-binding Berberine family protein
CmoCh20G009870	Cytochrome P450 family protein
CmoCh09G001800	Cytochrome P450
CmoCh20G006140	Isocitrate lyase
CmoCh07G005240	L-ascorbate oxidase family protein
CmoCh09G001790	Cytochrome P450
CmoCh13G005060	FAD-binding Berberine family protein
CmoCh01G007460	Putative heme-binding peroxidase
CmoCh04G024410	Nitrate reductase
CmoCh05G007130	Oxygen-dependent choline dehydrogenase
CmoCh09G002630	(Cytochrome P450, putative) (1.14.13.89)
CmoCh11G013370	Putative heme-binding peroxidase
CmoCh12G010430	Pyrophosphate-energized vacuolar membrane proton pump
CmoCh03G009020	(Phosphoenolpyruvate carboxykinase [ATP]) (4.1.1.49)
CmoCh11G013380	Putative heme-binding peroxidase
CmoCh20G003430	Peroxidase (1.11.1.7)
CmoCh13G006770	(Polyphenol oxidase) (1.10.3.1) (1.14.18.1)
CmoCh18G005030	FAD-binding Berberine family protein
CmoCh13G009720	(2-oxoglutarate (2OG) and Fe(II)-dependent oxygenase superfamily protein)
CmoCh05G011250	Lipoxygenase (1.13.11.-)
